# Supplementary material
Source: MDPI journal article supplement (https://www.mdpi.com/2813-2564/2/1/3)
Supplement: s1 [file s1]

Archive with 2 entries (2 files):
- supplementary_figures.pdf
- Supplementary_File_1_Differential_Expression_Results_DMSO_vs_3A4.xlsx
