# Supplementary material
Source: MDPI journal article supplement (https://www.mdpi.com/2813-2564/2/1/3)
Supplement: s1 [file s1 › supplementary_figures.pdf]

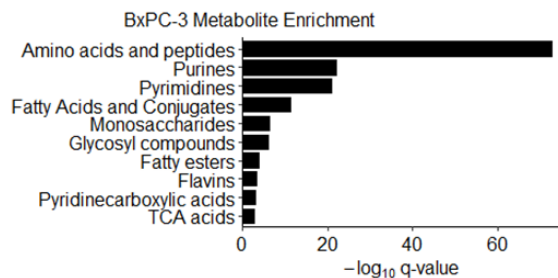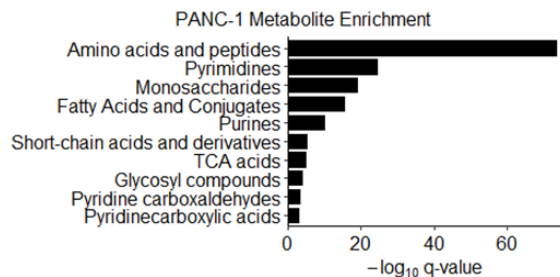

**Supplementary Figure S1. Metabolite class enrichment of total DDMs is associated with amino acids and fatty acids.** Total statistically significant ( $P < 0.05$ ) DDMs were used.

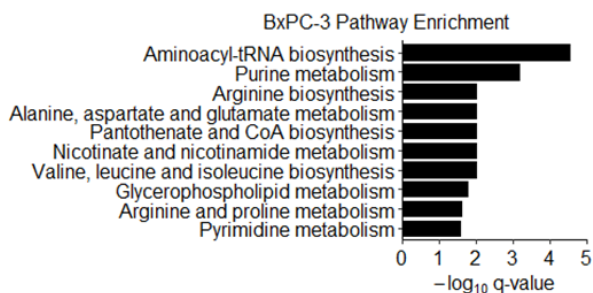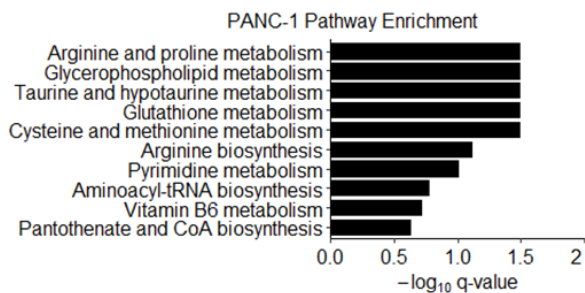

**Supplementary Figure S2. Metabolite pathway enrichment of total DDMs is associated with amino acid and glycerophospholipid metabolism.** Total statistically significant ( $P < 0.05$ ) DDMs were used.

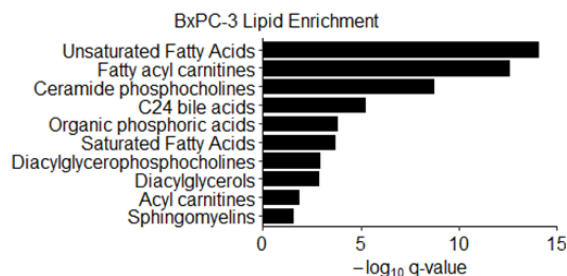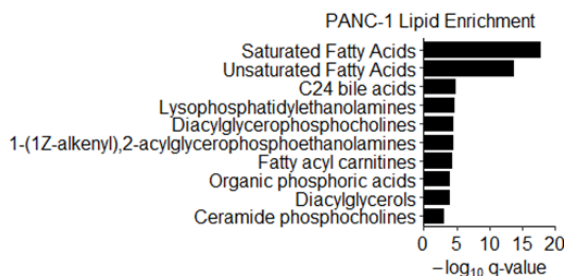

**Supplementary Figure S3. Lipid metabolite enrichment of total DDMs is associated with fatty acids and phospholipids.** Total statistically significant ( $P < 0.05$ ) DDMs were used.

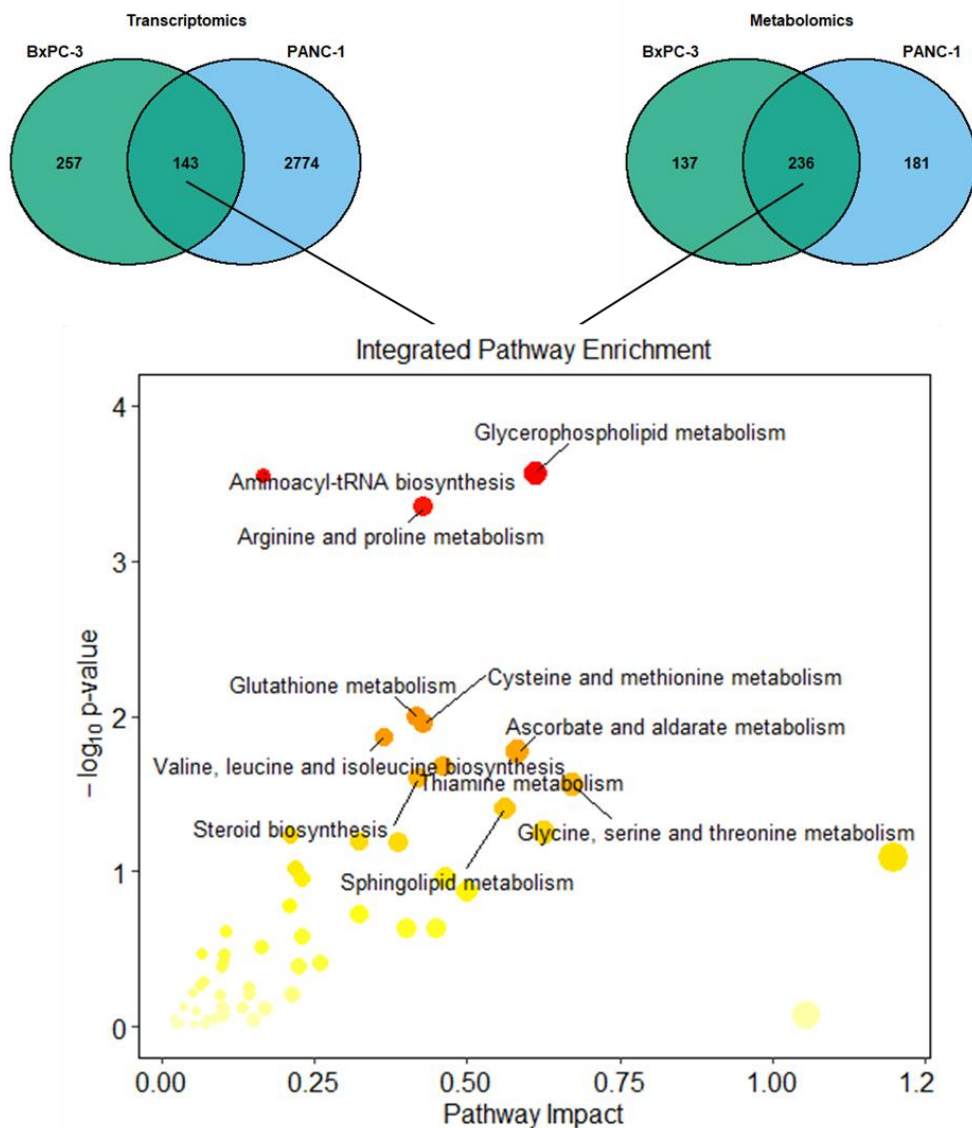

**Supplementary Figure S4. Integration of transcriptomics and metabolomics indicates glycerophospholipid metabolism is highly enriched.** Joint pathway enrichment analysis was performed with MetaboAnalyst 5.0 using the overlapping statistically significant DEGs and DDMs from BxPC-3 and PANC-1. Negative  $\log_{10} p$ -values are shown on y-axis and pathway impact values from pathway topology analysis are shown on x-axis. Labels are shown for those with  $p$ -values  $< 0.05$ . Color corresponds to statistical significance and size to pathway impact value.

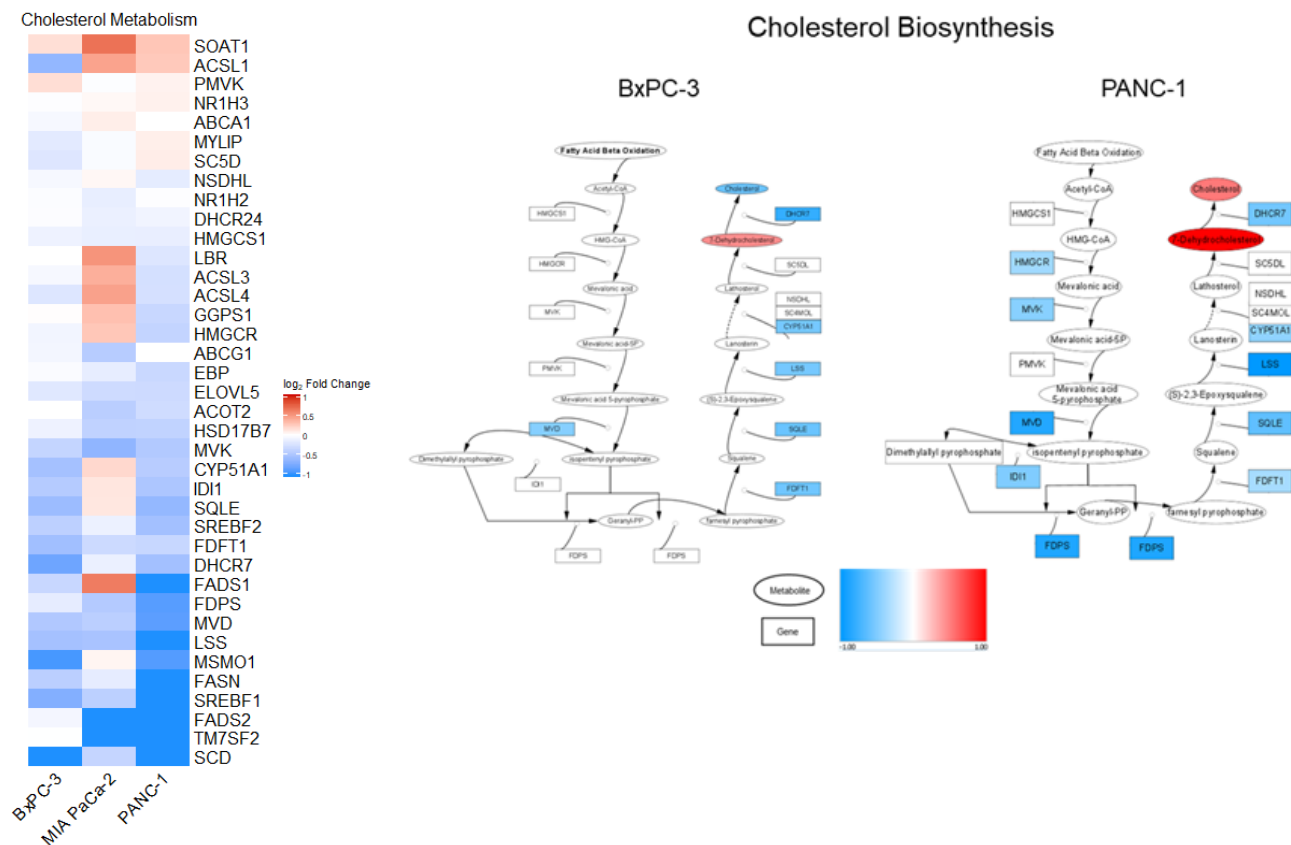

**Supplementary Figure S5. 3A4 affects the expression of cholesterol biosynthesis genes.** (Left) heatmap of log<sub>2</sub> fold change (vs. DMSO) expression values of cholesterol metabolism genes. (Right) cholesterol biosynthesis pathway map of metabolites and genes. Log<sub>2</sub> fold change (vs. DMSO) reported for metabolites and genes. Metabolites are depicted as ellipses and genes as rectangles.

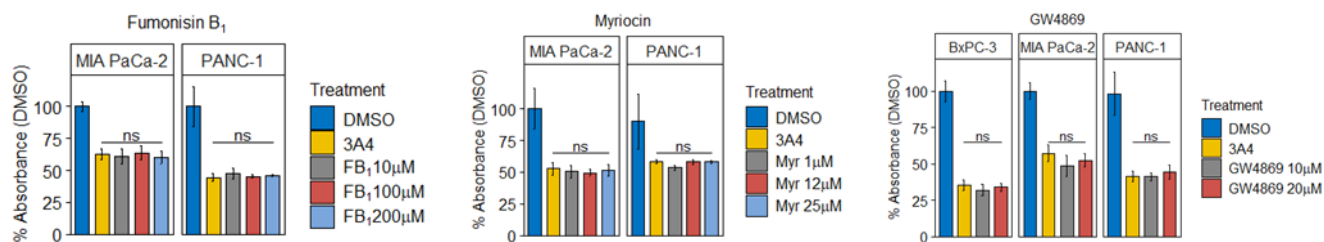

**Supplementary Figure S6. Ceramide synthesis inhibition does not rescue the antiproliferative effects of 3A4.** MTS viability assays of chemical ceramide synthesis inhibitors Fumonisin B<sub>1</sub>, Myriocin, and GW4869. Results are from three independent biological replicates and represent the mean  $\pm$  SEM. Student's t-test, with  $p < 0.05$  considered statistically significant.

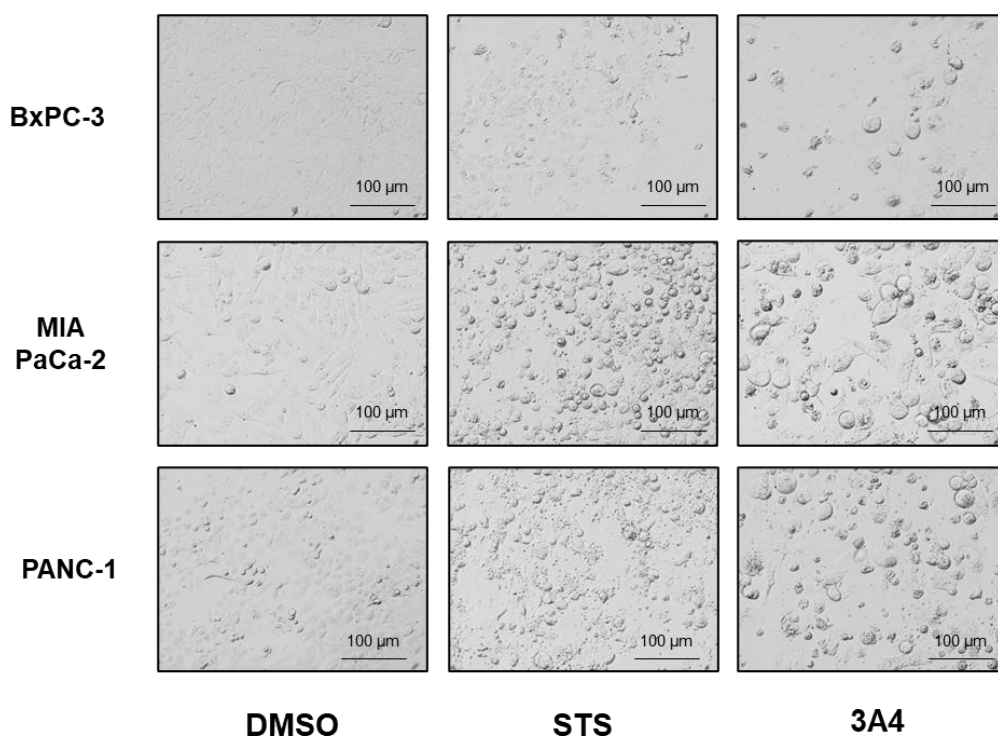

**Supplementary Figure S7. Morphological changes induced by 3A4 differ from apoptosis.** Cells were treated with DMSO, the apoptosis inducer staurosporine (STS), and 3A4 for 72 hours and imaged with brightfield microscopy at 400X total magnification.

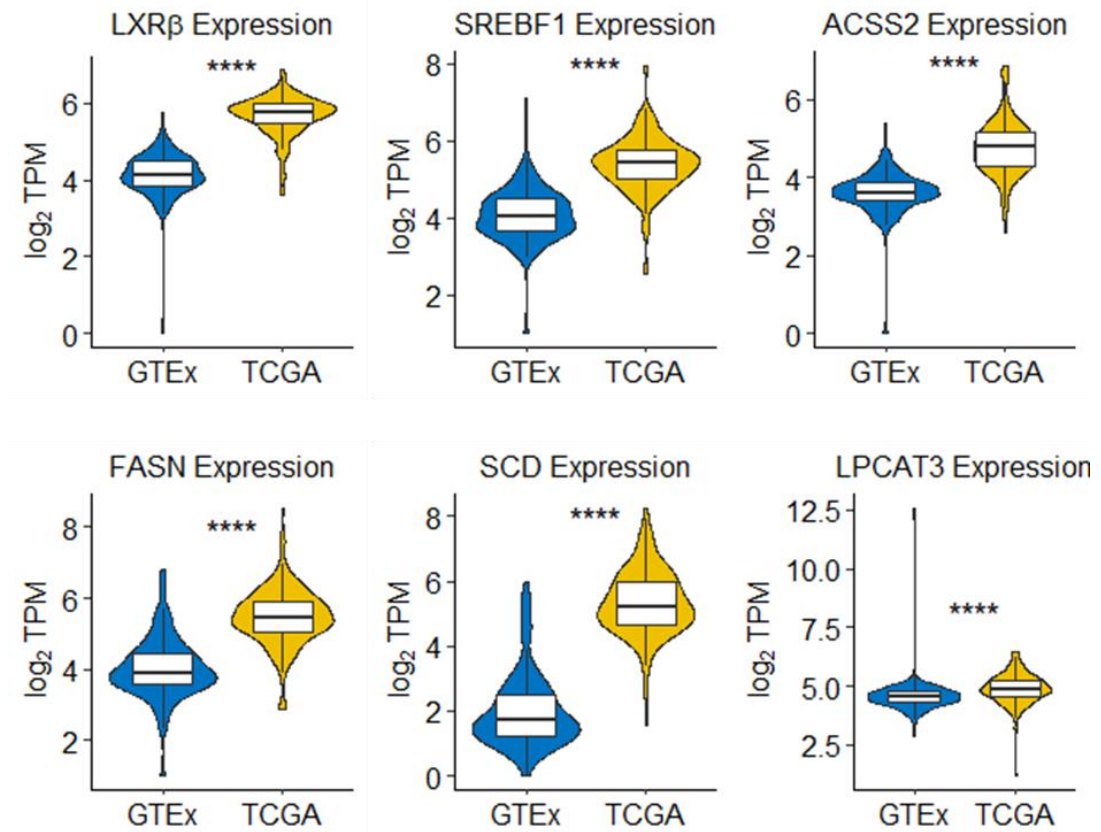

**Supplementary Figure S8. LXR $\beta$  and its target genes are overexpressed in pancreatic cancer.** TPM values of LXR $\beta$  and associated genes in TCGA pancreatic cancer samples (PAAD) and GTEx normal pancreas samples. Statistical significance of differences in means determined by Welch's t-test (\*\*\*\* =  $P < 0.0001$ ).

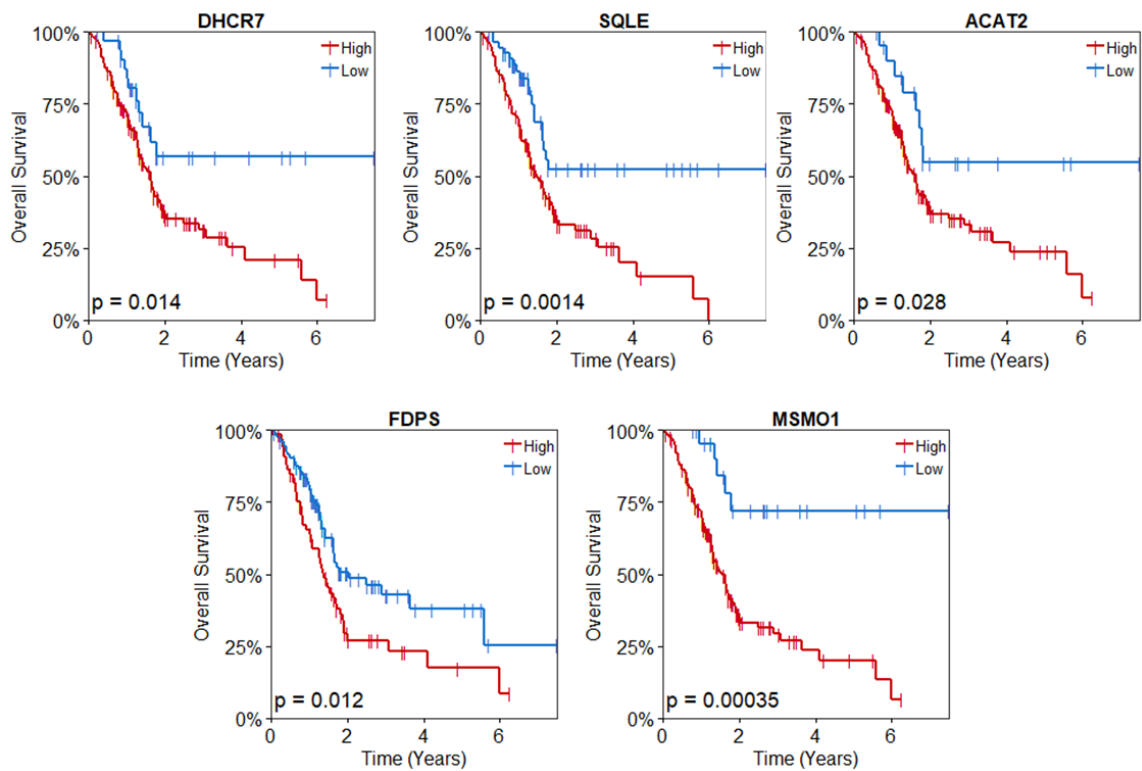

**Supplementary Figure S9. Cholesterol synthesis genes are correlated with survival in PDAC patients.** Kaplan-Meier plots of TCGA data from the PAAD cohort for genes involved in cholesterol synthesis that are downregulated by 3A4.

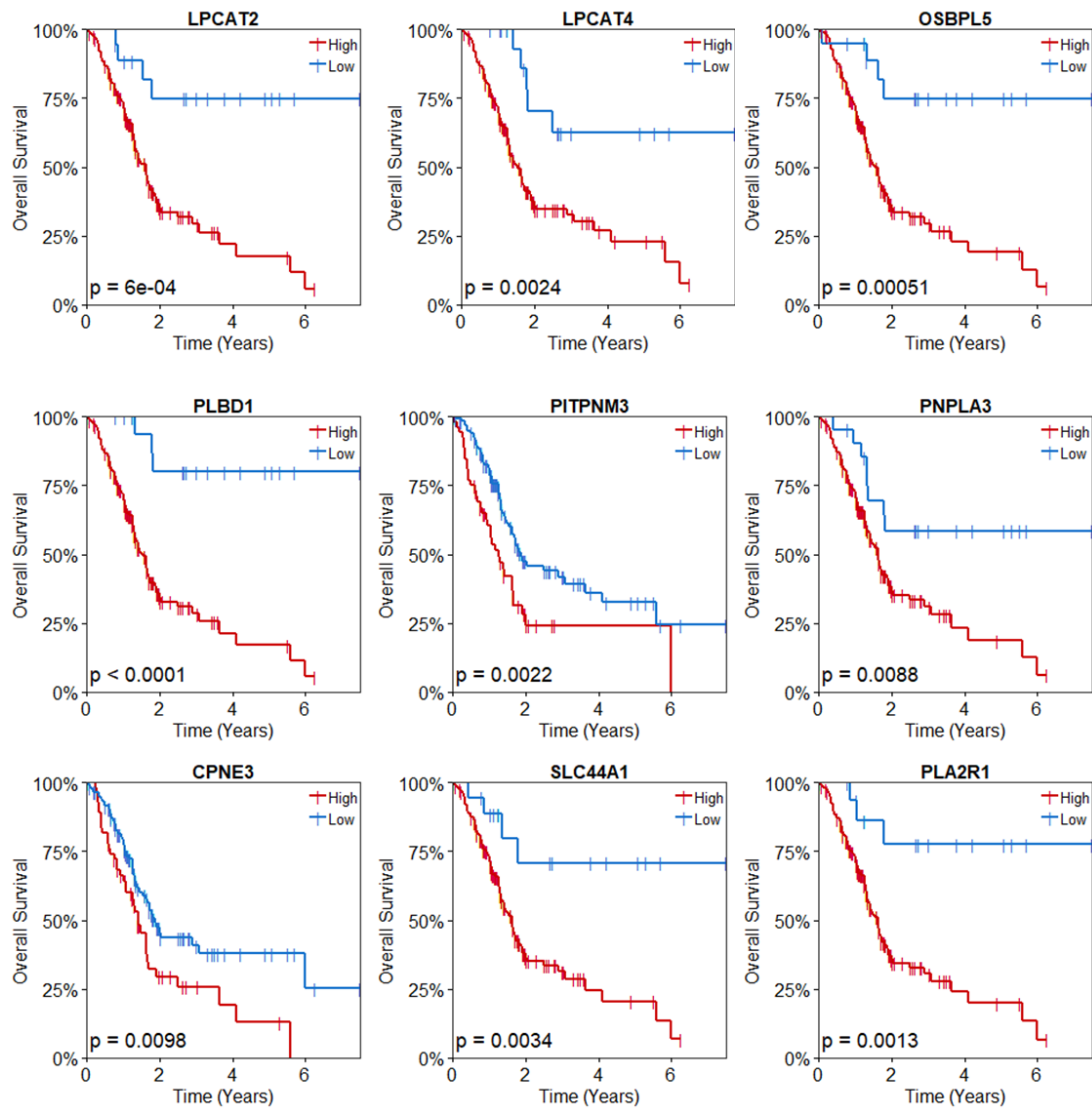

**Supplementary Figure S10. Phospholipid synthesis and remodeling genes are correlated with survival in PDAC patients.** Kaplan-Meier plots of TCGA data from the PAAD cohort for genes involved in phospholipid synthesis/remodeling that are downregulated by 3A4.
