# Supplementary material
Source: MDPI journal article supplement (https://www.mdpi.com/2813-2564/2/1/3)
Supplement: s1 [file s1 › Supplementary_File_1_Differential_Expression_Results_DMSO_vs_3A4.xlsx]

## Sheet: BxPC-3
gene_id	baseMean	log2FoldChange	lfcSE	stat	pvalue	padj	symbol
ENSG00000186205	225.755	0.0868154	0.214839	0.404095	0.686143	0.922101	2023-03-01
ENSG00000099785	89.7117	0.0889208	0.346478	0.256642	0.797455	0.955219	2023-03-02
ENSG00000117791	230.219	-0.38943	0.218089	-1.78565	0.0741565	0.429722	2023-03-02
ENSG00000173926	154.049	-0.117678	0.208102	-0.565485	0.571744	0.877995	2023-03-03
ENSG00000144583	575.847	0.0938254	0.20389	0.460178	0.645389	0.906221	2023-03-04
ENSG00000198060	1194.76	-0.122153	0.112807	-1.08285	0.278874	0.707001	2023-03-05
ENSG00000145495	5914.63	-0.173996	0.11053	-1.57419	0.115443	0.509484	2023-03-06
ENSG00000136536	1408.93	0.0658183	0.156508	0.420542	0.67409	0.917866	2023-03-07
ENSG00000165406	250.529	-0.125504	0.177166	-0.708397	0.478699	0.837858	2023-03-08
ENSG00000139266	531.264	-0.240227	0.147568	-1.6279	0.103545	0.489701	2023-03-09
ENSG00000168385	4349.55	-0.093143	0.244743	-0.380575	0.703518	0.926082	2023-09-02
ENSG00000125354	390.339	0.124912	0.147703	0.845694	0.397724	0.791376	2023-09-06
ENSG00000122545	5229.61	-0.0379002	0.187278	-0.202374	0.839624	0.964958	2023-09-07
ENSG00000164402	1563.85	-0.123781	0.143688	-0.861452	0.388989	0.786261	2023-09-08
ENSG00000184640	4034.11	0.132845	0.257544	0.515816	0.605983	0.88941	2023-09-09
ENSG00000186522	1861.28	-0.268605	0.157071	-1.71008	0.087251	0.460827	2023-09-10
ENSG00000138758	3062.18	0.172339	0.159837	1.07822	0.280938	0.709359	2023-09-11
ENSG00000128274	503.629	-0.665078	0.257523	-2.58259	0.00980605	0.157813	A4GALT
ENSG00000094914	852.428	0.104286	0.137072	0.760813	0.446769	0.821449	AAAS
ENSG00000081760	1628.03	-0.205744	0.132321	-1.55489	0.119973	0.516467	AACS
ENSG00000114771	697.454	0.110176	0.188847	0.583412	0.559616	0.873409	AADAC
ENSG00000240602	299.761	0.573336	0.316231	1.81303	0.0698277	0.417972	AADACP1
ENSG00000109576	109.865	0.0245103	0.27429	0.0893591	0.928797	0.984915	AADAT
ENSG00000103591	2297.88	-0.0145896	0.230564	-0.0632779	0.949545	0.989914	AAGAB
ENSG00000115977	799.728	0.133623	0.288313	0.463467	0.64303	0.905639	AAK1
ENSG00000087884	147.742	0.0732947	0.24663	0.297185	0.766325	0.944852	AAMDC
ENSG00000127837	2079.9	-0.115468	0.14071	-0.820609	0.411869	0.800856	AAMP
ENSG00000131043	1501.93	0.266928	0.148627	1.79596	0.0725008	0.425321	AAR2
ENSG00000090861	5533.84	-0.080792	0.117673	-0.686582	0.492346	0.843293	AARS
ENSG00000124608	697.959	-0.0240325	0.165756	-0.144987	0.884721	0.975091	AARS2
ENSG00000266967	406.211	0.115469	0.224033	0.51541	0.606267	0.889421	AARSD1
ENSG00000157426	333.292	-0.0892799	0.221621	-0.40285	0.687059	0.922579	AASDH
ENSG00000149313	1769.83	-0.0869509	0.134389	-0.647009	0.517626	0.856181	AASDHPPT
ENSG00000008311	293.688	-0.414118	0.297537	-1.39182	0.163977	0.579115	AASS
ENSG00000275700	1593	0.416601	0.181703	2.29275	0.0218622	0.239021	AATF
ENSG00000281376	350.247	0.0987965	0.190422	0.518831	0.603879	0.889398	ABALON
ENSG00000183044	849.657	-0.756818	0.162196	-4.66606	3.07e-06	0.000610442	ABAT
ENSG00000165029	948.039	-0.320491	0.264026	-1.21386	0.224801	0.658902	ABCA1
ENSG00000154263	270.922	0.356928	0.226082	1.57876	0.114392	0.507086	ABCA10
ENSG00000251595	136.052	0.34797	0.217226	1.60188	0.109183	0.499971	ABCA11P
ENSG00000144452	739.768	0.421293	0.212315	1.98428	0.0472245	0.348802	ABCA12
ENSG00000179869	902.873	0.516904	0.337521	1.53147	0.125653	0.523534	ABCA13
ENSG00000107331	1235.37	-0.473831	0.156328	-3.03101	0.00243737	0.0686993	ABCA2
ENSG00000154265	172.123	-0.21571	0.229615	-0.939445	0.347502	0.759026	ABCA5
ENSG00000064687	907.434	0.116249	0.181393	0.640866	0.52161	0.859022	ABCA7
ENSG00000135776	529.138	-0.142655	0.148872	-0.958242	0.337941	0.753101	ABCB10
ENSG00000073734	177.923	0.283392	0.270534	1.04753	0.294856	0.723759	ABCB11
ENSG00000115657	473.807	-0.324473	0.195189	-1.66236	0.096441	0.478634	ABCB6
ENSG00000131269	796.252	-0.0632899	0.158891	-0.398324	0.690392	0.923804	ABCB7
ENSG00000197150	622.012	0.0793926	0.163256	0.486308	0.626748	0.898329	ABCB8
ENSG00000150967	239.202	-0.00910975	0.173756	-0.0524285	0.958187	0.991068	ABCB9
ENSG00000103222	3407.99	-0.0646811	0.131445	-0.492076	0.622665	0.897548	ABCC1
ENSG00000124574	693.274	0.122091	0.157983	0.772812	0.439634	0.817373	ABCC10
ENSG00000108846	1253.66	-0.188901	0.199774	-0.945572	0.344367	0.756151	ABCC3
ENSG00000125257	602.4	0.441001	0.162309	2.71704	0.00658685	0.124246	ABCC4
ENSG00000114770	1816.56	-0.111172	0.12169	-0.913565	0.360946	0.768353	ABCC5
ENSG00000101986	958.642	-0.0107261	0.128516	-0.0834607	0.933485	0.985814	ABCD1
ENSG00000117528	2341.63	-0.0301557	0.128147	-0.23532	0.81396	0.958293	ABCD3
ENSG00000119688	538.547	0.0621758	0.166133	0.374253	0.708216	0.927022	ABCD4
ENSG00000164163	4303.23	0.119311	0.16627	0.717572	0.473021	0.835562	ABCE1
ENSG00000204574	1940.69	0.214749	0.122783	1.74902	0.080288	0.444919	ABCF1
ENSG00000033050	4021.23	0.1471	0.197309	0.74553	0.455951	0.826057	ABCF2
ENSG00000285292	153.182	0.878488	1.82514	0.481326	0.630285	0.900044	ABCF2
ENSG00000161204	1212.67	-0.0571244	0.143433	-0.398267	0.690434	0.923804	ABCF3
ENSG00000160179	171.257	-0.689576	0.362817	-1.90062	0.0573518	0.381473	ABCG1
ENSG00000118777	171.861	0.669717	0.240993	2.77899	0.00545286	0.112838	ABCG2
ENSG00000144827	857.525	-0.233365	0.173156	-1.34772	0.17775	0.597222	ABHD10
ENSG00000106077	608.029	0.0514567	0.160692	0.320219	0.748803	0.9392	ABHD11
ENSG00000100997	1786.17	-0.0887075	0.155172	-0.571671	0.567545	0.875703	ABHD12
ENSG00000139826	808.064	-0.333857	0.166631	-2.00356	0.0451168	0.342697	ABHD13
ENSG00000248487	124.297	0.00339309	0.406461	0.00834788	0.993339	0.998	ABHD14A
ENSG00000114786	330.566	0.328349	1.37082	0.239529	0.810696	0.957293	ABHD14A-ACY1
ENSG00000114779	276.085	-0.259993	0.438529	-0.592874	0.553265	0.87108	ABHD14B
ENSG00000168792	414.277	-0.216314	0.159757	-1.35402	0.17573	0.594782	ABHD15
ENSG00000204427	1077.89	0.00672799	0.135129	0.0497893	0.96029	0.991068	ABHD16A
ENSG00000129968	838.869	0.318293	0.253088	1.25764	0.208522	0.637889	ABHD17A
ENSG00000107362	255.633	-0.154727	0.168835	-0.916436	0.359438	0.767677	ABHD17B
ENSG00000136379	2336.82	-0.343168	0.213321	-1.60869	0.107684	0.4973	ABHD17C
ENSG00000164074	318.842	0.0363538	0.17703	0.205354	0.837295	0.964659	ABHD18
ENSG00000140526	4617.89	0.140515	0.142788	0.984085	0.325074	0.743465	ABHD2
ENSG00000158201	653.693	-0.0955966	0.152224	-0.627999	0.530004	0.862606	ABHD3
ENSG00000100439	712.88	-0.32283	0.134788	-2.39508	0.0166166	0.206854	ABHD4
ENSG00000011198	811.129	0.347478	0.214813	1.61758	0.105753	0.492735	ABHD5
ENSG00000163686	117.703	0.448581	0.43278	1.03651	0.299964	0.726342	ABHD6
ENSG00000127220	326.715	0.026539	0.184231	0.144053	0.885459	0.97535	ABHD8
ENSG00000136754	1512.7	-0.117811	0.210301	-0.560202	0.575342	0.879847	ABI1
ENSG00000138443	1011.04	-0.136495	0.260911	-0.523146	0.600872	0.88806	ABI2
ENSG00000097007	1922.09	0.146759	0.135652	1.08187	0.279308	0.707078	ABL1
ENSG00000143322	1188.45	0.682259	0.235094	2.90206	0.00370714	0.0903033	ABL2
ENSG00000099204	6158.45	-0.156202	0.113089	-1.38123	0.167209	0.582836	ABLIM1
ENSG00000173210	738.094	0.336106	0.167916	2.00163	0.0453241	0.343271	ABLIM3
ENSG00000175164	1487.33	-0.563657	0.167571	-3.3637	0.000769057	0.0337108	ABO
ENSG00000159842	1336.27	0.0158644	0.157735	0.100576	0.919887	0.983349	ABR
ENSG00000146386	2161.8	-0.0358966	0.187922	-0.191018	0.848511	0.967274	ABRACL
ENSG00000163322	160.093	0.000112767	0.220104	0.000512332	0.999591	0.999795	ABRAXAS1
ENSG00000165660	1073.44	0.110099	0.130109	0.846203	0.39744	0.791376	ABRAXAS2
ENSG00000146109	896.466	-0.109537	0.141254	-0.775463	0.438066	0.816441	ABT1
ENSG00000114626	378.717	-0.430736	0.221794	-1.94205	0.0521307	0.365332	ABTB1
ENSG00000166016	648.04	0.804211	0.241776	3.32626	0.000880188	0.0367266	ABTB2
ENSG00000060971	2001.2	-0.11023	0.111187	-0.99139	0.321495	0.741641	ACAA1
ENSG00000167315	1813.75	-0.0260283	0.152455	-0.170728	0.864438	0.970705	ACAA2
ENSG00000278540	4107.09	-0.427464	0.111774	-3.82436	0.000131114	0.00974284	ACACA
ENSG00000111271	208.212	0.255075	0.235519	1.08303	0.278793	0.707001	ACAD10
ENSG00000240303	343.38	-0.396227	0.301385	-1.31469	0.188615	0.613279	ACAD11
ENSG00000151498	678.191	0.0589207	0.169245	0.348139	0.727736	0.934635	ACAD8
ENSG00000177646	1312.82	0.159294	0.183819	0.86658	0.386172	0.784634	ACAD9
ENSG00000117054	1573.14	-0.103397	0.177142	-0.583699	0.559423	0.873409	ACADM
ENSG00000122971	324.547	-0.350362	0.167944	-2.08619	0.0369616	0.315255	ACADS
ENSG00000196177	142.233	-0.0650549	0.373526	-0.174164	0.861737	0.969693	ACADSB
ENSG00000072778	3011.9	0.0503735	0.106598	0.472556	0.63653	0.902532	ACADVL
ENSG00000114331	1054.79	-0.210116	0.157195	-1.33666	0.181333	0.602791	ACAP2
ENSG00000131584	1326.97	-0.133701	0.137839	-0.969977	0.332058	0.749135	ACAP3
ENSG00000075239	454.638	-0.0212822	0.142914	-0.148916	0.88162	0.974538	ACAT1
ENSG00000120437	1451.98	-0.513814	0.181608	-2.82925	0.0046657	0.102134	ACAT2
ENSG00000182827	1325.47	-0.0873304	0.142758	-0.611738	0.540711	0.865356	ACBD3
ENSG00000181513	56.3343	-0.482494	0.395254	-1.22072	0.222192	0.656015	ACBD4
ENSG00000107897	717.896	-0.189769	0.122306	-1.55159	0.120759	0.51849	ACBD5
ENSG00000230124	797.914	-0.271284	0.133558	-2.03121	0.0422335	0.333022	ACBD6
ENSG00000110455	130.643	-0.225605	0.309054	-0.729987	0.465398	0.831904	ACCS
ENSG00000102977	477.338	0.215021	0.172873	1.24381	0.21357	0.643899	ACD
ENSG00000130234	74.5899	-0.838957	0.588124	-1.4265	0.153725	0.561453	ACE2
ENSG00000177076	146.509	0.0741187	0.402485	0.184153	0.853894	0.968298	ACER2
ENSG00000078124	1704.64	0.311454	0.140422	2.21798	0.0265563	0.261878	ACER3
ENSG00000100813	3524.94	-0.248445	0.152107	-1.63335	0.102395	0.488167	ACIN1
ENSG00000144476	63.0779	-0.689215	0.431345	-1.59783	0.110081	0.501712	ACKR3
ENSG00000131473	4283.08	-0.138236	0.158255	-0.873501	0.38239	0.782381	ACLY
ENSG00000122729	1667.14	0.253144	0.1274	1.987	0.0469223	0.348528	ACO1
ENSG00000100412	2176.48	-0.171505	0.134747	-1.27279	0.203091	0.631062	ACO2
ENSG00000184227	313.963	-0.67597	0.207255	-3.26154	0.00110809	0.0416965	ACOT1
ENSG00000162390	877.112	-0.0802704	0.147311	-0.544902	0.585821	0.88327	ACOT11
ENSG00000112304	389.331	-0.0410781	0.195033	-0.210621	0.833183	0.963394	ACOT13
ENSG00000119673	433.219	-0.00095939	0.195284	-0.00491279	0.99608	0.998666	ACOT2
ENSG00000177465	273.876	0.319181	0.204993	1.55703	0.119462	0.515743	ACOT4
ENSG00000097021	2059.36	-0.0041665	0.222317	-0.0187412	0.985048	0.997177	ACOT7
ENSG00000101473	580.154	-0.0256381	0.163147	-0.157147	0.875129	0.971977	ACOT8
ENSG00000123130	959.628	0.201355	0.139574	1.44264	0.149121	0.556274	ACOT9
ENSG00000161533	828.698	0.119286	0.181651	0.656676	0.511389	0.854134	ACOX1
ENSG00000087008	239.068	0.0123302	0.186067	0.0662677	0.947165	0.989115	ACOX3
ENSG00000143727	937.911	0.193972	0.2071	0.936613	0.348958	0.759751	ACP1
ENSG00000134575	806.958	0.202659	0.13803	1.46823	0.142043	0.543955	ACP2
ENSG00000102575	30.0698	-0.419558	0.425905	-0.985097	0.324576	0.743379	ACP5
ENSG00000162836	553.837	0.0830469	0.136751	0.607284	0.543662	0.86662	ACP6
ENSG00000183760	169.331	-0.244564	0.285665	-0.856122	0.39193	0.787192	ACP7
ENSG00000167107	847.812	-0.343855	0.154331	-2.22805	0.0258775	0.259056	ACSF2
ENSG00000176715	403.844	-0.109787	0.254086	-0.432088	0.665678	0.914494	ACSF3
ENSG00000151726	1081.04	-0.715449	0.169548	-4.21973	2.45e-05	0.00312934	ACSL1
ENSG00000123983	6164.42	-0.125613	0.135402	-0.927704	0.353561	0.763308	ACSL3
ENSG00000068366	2714.25	-0.293144	0.116102	-2.52487	0.011574	0.172531	ACSL4
ENSG00000197142	4421.77	0.190156	0.186825	1.01783	0.308758	0.731556	ACSL5
ENSG00000154930	551.455	0.0568757	0.186704	0.304631	0.760647	0.94299	ACSS1
ENSG00000131069	1637.17	-0.835265	0.144283	-5.78908	7.08e-09	4.34e-06	ACSS2
ENSG00000107796	121.873	-0.0302887	0.328221	-0.0922815	0.926474	0.984325	ACTA2
ENSG00000075624	53211.9	0.00732343	0.131657	0.0556249	0.955641	0.991068	ACTB
ENSG00000169067	94.3511	0.0257809	0.304276	0.0847288	0.932477	0.985386	ACTBL2
ENSG00000184009	19579.7	0.211098	0.169033	1.24886	0.211718	0.641873	ACTG1
ENSG00000182584	65.5052	-0.282579	0.329904	-0.856549	0.391694	0.787188	ACTL10
ENSG00000136518	1671.14	0.150533	0.1594	0.944368	0.344982	0.756151	ACTL6A
ENSG00000072110	7801.69	0.0883581	0.14223	0.621235	0.534445	0.864203	ACTN1
ENSG00000130402	33729.9	0.0295518	0.129181	0.228763	0.819053	0.958971	ACTN4
ENSG00000131966	1071.41	-0.0171332	0.182729	-0.0937627	0.925298	0.983966	ACTR10
ENSG00000138107	1414.19	0.353523	0.223337	1.58291	0.113441	0.506237	ACTR1A
ENSG00000115073	879.04	-0.0619557	0.156817	-0.395083	0.692782	0.92423	ACTR1B
ENSG00000138071	4858.67	-0.191937	0.134949	-1.42229	0.154941	0.563017	ACTR2
ENSG00000115091	5538.86	-0.00182965	0.142316	-0.0128563	0.989742	0.997298	ACTR3
ENSG00000133627	168.159	0.290049	0.214549	1.3519	0.176407	0.595704	ACTR3B
ENSG00000106526	195.193	0.177942	0.246189	0.722787	0.469811	0.834658	ACTR3C
ENSG00000101442	373.054	0.506508	0.203246	2.49209	0.0126995	0.179595	ACTR5
ENSG00000075089	720.567	-0.04952	0.179962	-0.27517	0.783186	0.950303	ACTR6
ENSG00000113812	664.708	0.225957	0.17292	1.30671	0.191311	0.616056	ACTR8
ENSG00000184378	149.531	0.116222	0.223808	0.519292	0.603557	0.889119	ACTRT3
ENSG00000115170	840.13	-0.039681	0.181149	-0.219052	0.826609	0.96038	ACVR1
ENSG00000135503	1281.38	-0.10014	0.174599	-0.573544	0.566276	0.875703	ACVR1B
ENSG00000123612	259.482	-0.464701	0.522465	-0.889439	0.373767	0.776814	ACVR1C
ENSG00000121989	168.185	0.212161	0.254362	0.834089	0.404231	0.797059	ACVR2A
ENSG00000243989	572.573	-0.391769	0.381559	-1.02676	0.304534	0.729969	ACY1
ENSG00000119640	233.736	0.0848043	0.291326	0.291097	0.770977	0.945976	ACYP1
ENSG00000170634	202.006	-0.308034	0.19557	-1.57506	0.115243	0.509289	ACYP2
ENSG00000196839	453.588	-0.17256	0.192969	-0.894239	0.371194	0.77611	ADA
ENSG00000168803	225.031	0.115945	0.271676	0.426778	0.669541	0.916475	ADAL
ENSG00000137845	6796.84	-0.330425	0.151465	-2.18153	0.0291441	0.275728	ADAM10
ENSG00000143537	4586.59	0.035346	0.139879	0.252689	0.800508	0.955634	ADAM15
ENSG00000151694	448.49	-0.112566	0.151297	-0.744011	0.45687	0.82662	ADAM17
ENSG00000135074	119.756	-0.588828	0.70692	-0.832949	0.404873	0.797337	ADAM19
ENSG00000042980	821.801	-0.105959	0.181796	-0.582844	0.559998	0.873543	ADAM28
ENSG00000151651	4731.6	0.403436	0.18613	2.16749	0.0301973	0.279957	ADAM8
ENSG00000168615	8338.12	-0.0732169	0.105433	-0.694439	0.487407	0.840937	ADAM9
ENSG00000154734	1489.13	-0.271744	0.216509	-1.25512	0.209437	0.638769	ADAMTS1
ENSG00000151388	2232.52	0.0895026	0.19345	0.462665	0.643605	0.905639	ADAMTS12
ENSG00000166106	429.754	0.0118794	0.241428	0.0492049	0.960756	0.991068	ADAMTS15
ENSG00000140470	54.0513	-0.013696	0.433694	-0.0315798	0.974807	0.995176	ADAMTS17
ENSG00000173157	196.984	-0.466236	0.285756	-1.63159	0.102767	0.488531	ADAMTS20
ENSG00000143382	265.432	-0.434946	0.338607	-1.28452	0.198961	0.624428	ADAMTSL4
ENSG00000185761	165.656	-0.250025	0.349287	-0.715815	0.474106	0.835562	ADAMTSL5
ENSG00000105963	1175.61	-0.281321	0.168965	-1.66497	0.095918	0.477255	ADAP1
ENSG00000160710	6771.72	0.386809	0.0994477	3.88957	0.000100421	0.00839481	ADAR
ENSG00000197381	470.04	0.38069	0.167699	2.27008	0.0232026	0.246544	ADARB1
ENSG00000065457	937.227	0.161396	0.123961	1.30199	0.192919	0.617876	ADAT1
ENSG00000189007	464.59	0.156818	0.155638	1.00758	0.313655	0.735642	ADAT2
ENSG00000213638	67.8556	0.212466	0.338649	0.627393	0.530402	0.862691	ADAT3
ENSG00000063761	202.216	0.411616	0.236307	1.74187	0.0815311	0.447683	ADCK1
ENSG00000133597	576.655	-0.0798598	0.162844	-0.490408	0.623845	0.898004	ADCK2
ENSG00000173137	239.452	-0.200801	0.18544	-1.08283	0.278882	0.707001	ADCK5
ENSG00000138031	899.908	-0.139945	0.177539	-0.788252	0.430549	0.812806	ADCY3
ENSG00000174233	885.001	-0.367385	0.158602	-2.3164	0.0205366	0.231952	ADCY6
ENSG00000121281	964.794	-0.0713202	0.157147	-0.453845	0.649941	0.908299	ADCY7
ENSG00000162104	527.697	-0.0666939	0.127571	-0.522797	0.601116	0.888077	ADCY9
ENSG00000087274	2667.76	0.179685	0.221642	0.810701	0.417537	0.804108	ADD1
ENSG00000148700	2847.75	-0.30037	0.202184	-1.48563	0.137378	0.538085	ADD3
ENSG00000152990	900.238	-0.150824	0.121489	-1.24146	0.214436	0.644851	ADGRA3
ENSG00000121753	168.624	-0.486893	0.209832	-2.32039	0.0203198	0.231523	ADGRB2
ENSG00000123146	1375.35	0.159905	0.209421	0.763558	0.445131	0.820806	ADGRE5
ENSG00000153292	1704.01	-0.0336056	0.100939	-0.332931	0.739186	0.937251	ADGRF1
ENSG00000153294	948.42	0.0920903	0.167623	0.549391	0.582737	0.881655	ADGRF4
ENSG00000205336	3734.09	0.0172811	0.130797	0.132122	0.894888	0.975416	ADGRG1
ENSG00000112414	3268.16	-0.36617	0.167919	-2.18064	0.0292103	0.275848	ADGRG6
ENSG00000164199	82.0858	-0.840552	0.287644	-2.92219	0.00347577	0.085948	ADGRV1
ENSG00000248144	72.5079	0.174848	0.411416	0.42499	0.670844	0.916475	ADH1C
ENSG00000197894	3289.64	-0.0754069	0.131347	-0.574106	0.565896	0.875703	ADH5
ENSG00000182551	970.201	-0.248781	0.137178	-1.81356	0.0697454	0.417649	ADI1
ENSG00000159346	3368.79	-0.0488079	0.102841	-0.474594	0.635076	0.902267	ADIPOR1
ENSG00000006831	4693.23	-0.205911	0.0967439	-2.12842	0.0333026	0.298769	ADIPOR2
ENSG00000148671	665.876	-0.75321	0.177616	-4.24067	2.23e-05	0.00295397	ADIRF
ENSG00000156110	1788.38	0.0807216	0.118834	0.679278	0.496961	0.84593	ADK
ENSG00000148926	287.127	1.1101	0.341825	3.24758	0.0011639	0.0432435	ADM
ENSG00000101126	1663.52	-0.0479666	0.349081	-0.137408	0.890708	0.975416	ADNP
ENSG00000101544	1148.43	0.178785	0.124174	1.4398	0.149925	0.556698	ADNP2
ENSG00000259456	54.8569	-0.00363156	0.364856	-0.00995339	0.992058	0.997891	ADNP-AS1
ENSG00000181915	1076.67	-0.232217	0.106893	-2.17243	0.0298233	0.278666	ADO
ENSG00000170425	1148.57	-0.0434055	0.132245	-0.328221	0.742745	0.938523	ADORA2B
ENSG00000159322	2075.85	0.055552	0.117545	0.472601	0.636498	0.902532	ADPGK
ENSG00000116863	965.819	0.118939	0.139652	0.851687	0.394388	0.789406	ADPRHL2
ENSG00000170222	78.9136	0.167835	0.281581	0.596044	0.551146	0.870252	ADPRM
ENSG00000169252	1486.41	0.34507	0.175601	1.96508	0.0494045	0.357051	ADRB2
ENSG00000130706	4577.5	0.319196	0.179832	1.77497	0.0759028	0.434539	ADRM1
ENSG00000239900	1299.17	0.143849	0.146577	0.981384	0.326403	0.744554	ADSL
ENSG00000035687	2358.49	-0.198821	0.130817	-1.51984	0.128551	0.527707	ADSS
ENSG00000185100	48.0613	-0.773522	0.556742	-1.38937	0.164719	0.579788	ADSSL1
ENSG00000111863	68.681	0.648299	0.37364	1.73509	0.0827247	0.450288	ADTRP
ENSG00000139154	1071.88	-0.333333	0.147581	-2.25864	0.0239061	0.248429	AEBP2
ENSG00000181026	1335.73	0.424077	0.203508	2.08383	0.0371757	0.315698	AEN
ENSG00000104964	4701.74	-0.281	0.117177	-2.39809	0.0164807	0.206282	AES
ENSG00000196526	1496.37	0.169934	0.120159	1.41424	0.157291	0.566249	AFAP1
ENSG00000272620	1993.19	0.176406	0.153894	1.14628	0.251677	0.68427	AFAP1-AS1
ENSG00000157510	846.311	0.0248709	0.114582	0.217057	0.828164	0.960869	AFAP1L1
ENSG00000169129	3876.62	-0.262045	0.0887535	-2.9525	0.0031521	0.07996	AFAP1L2
ENSG00000130396	2040.04	0.0590297	0.135094	0.436953	0.662145	0.913137	AFDN
ENSG00000172493	907.006	-0.516075	0.63279	-0.815555	0.414755	0.802228	AFF1
ENSG00000072364	3275.18	0.272659	0.165565	1.64684	0.0995902	0.483269	AFF4
ENSG00000223959	303.122	0.344383	0.226159	1.52274	0.127823	0.526352	AFG3L1P
ENSG00000141385	2425.56	0.0537577	0.120297	0.446877	0.654964	0.910428	AFG3L2
ENSG00000183077	188.689	-0.102187	0.259064	-0.394445	0.693252	0.92423	AFMID
ENSG00000119844	752.811	0.0691823	0.151166	0.457658	0.647198	0.906879	AFTPH
ENSG00000038002	452.103	-0.163442	0.188944	-0.865025	0.387025	0.784987	AGA
ENSG00000157985	703.361	0.212385	0.18954	1.12053	0.262488	0.694045	AGAP1
ENSG00000135439	251.665	0.22008	0.205627	1.07029	0.284491	0.713555	AGAP2
ENSG00000255737	339.666	0.209931	0.173539	1.2097	0.226393	0.660951	AGAP2-AS1
ENSG00000133612	2297.84	-0.17375	0.121012	-1.4358	0.151059	0.558284	AGAP3
ENSG00000188234	168.153	-0.277378	0.203666	-1.36193	0.17322	0.591497	AGAP4
ENSG00000204149	192.132	0.0552168	0.315413	0.175062	0.861031	0.969609	AGAP6
ENSG00000204172	136.801	-0.010334	0.272303	-0.0379503	0.969727	0.994327	AGAP9
ENSG00000084693	463.156	-0.083268	0.174238	-0.477898	0.632723	0.900662	AGBL5
ENSG00000204305	40.4454	-0.6293	0.459869	-1.36843	0.171177	0.588853	AGER
ENSG00000173744	1394.82	0.363431	0.12607	2.88277	0.00394201	0.093273	AGFG1
ENSG00000106351	411.907	0.602356	0.208279	2.89207	0.00382716	0.0920082	AGFG2
ENSG00000164252	963.123	-0.213763	0.181603	-1.17709	0.239158	0.672799	AGGF1
ENSG00000006530	784.884	0.00632539	0.141107	0.0448269	0.964245	0.992345	AGK
ENSG00000162688	1461.87	-0.213777	0.159337	-1.34167	0.179704	0.59973	AGL
ENSG00000116771	322.861	0.39736	0.207496	1.91502	0.0554899	0.376777	AGMAT
ENSG00000092847	844.391	0.231154	0.411149	0.562215	0.57397	0.879205	AGO1
ENSG00000123908	2729.69	0.337024	0.1786	1.88703	0.0591566	0.388212	AGO2
ENSG00000126070	845.789	0.341441	0.149819	2.27902	0.022666	0.243954	AGO3
ENSG00000134698	437.415	-0.0829909	0.194499	-0.42669	0.669605	0.916475	AGO4
ENSG00000204310	1014.8	0.0803308	0.135612	0.592357	0.553612	0.871173	AGPAT1
ENSG00000169692	1424.44	-0.304421	0.242065	-1.2576	0.208536	0.637889	AGPAT2
ENSG00000160216	1099.79	-0.41125	0.165823	-2.48005	0.0131363	0.181296	AGPAT3
ENSG00000026652	416.5	-0.029045	0.21826	-0.133075	0.894134	0.975416	AGPAT4
ENSG00000155189	1508.66	-0.1901	0.367085	-0.517864	0.604553	0.889398	AGPAT5
ENSG00000018510	2796.92	-0.103899	0.121654	-0.854052	0.393076	0.788326	AGPS
ENSG00000106541	6034.26	-0.688037	0.248178	-2.77235	0.00556535	0.113885	AGR2
ENSG00000188157	20130.4	-0.299945	0.203683	-1.47261	0.140856	0.541243	AGRN
ENSG00000135049	497.538	0.123034	0.149003	0.825715	0.408966	0.799668	AGTPBP1
ENSG00000177674	697.502	0.66476	0.169984	3.91072	9.2e-05	0.00802327	AGTRAP
ENSG00000153207	1962.11	0.0765725	0.171563	0.446323	0.655364	0.910428	AHCTF1
ENSG00000226121	396.399	0.176962	0.193777	0.913227	0.361123	0.768471	AHCTF1P1
ENSG00000101444	6591.06	0.0711748	0.154924	0.459417	0.645934	0.906221	AHCY
ENSG00000168710	2865.2	-0.1899	0.228287	-0.831846	0.405496	0.797631	AHCYL1
ENSG00000158467	1634.19	-0.226412	0.217295	-1.04196	0.297431	0.724973	AHCYL2
ENSG00000126705	957.559	-0.135679	0.184251	-0.736382	0.461498	0.829467	AHDC1
ENSG00000135541	394.552	-0.0683194	0.153745	-0.44437	0.656775	0.911314	AHI1
ENSG00000124942	55140.3	0.257501	0.162658	1.58309	0.113402	0.506237	AHNAK
ENSG00000185567	4801.31	-0.256813	0.181821	-1.41245	0.157817	0.56674	AHNAK2
ENSG00000106546	2706.85	-0.375081	0.178011	-2.10707	0.0351117	0.307316	AHR
ENSG00000063438	112.343	-0.150966	0.354758	-0.425547	0.670438	0.916475	AHRR
ENSG00000100591	4365.32	0.155405	0.149013	1.04289	0.296997	0.724973	AHSA1
ENSG00000173209	836.925	-0.208878	0.372173	-0.561239	0.574635	0.87968	AHSA2P
ENSG00000186063	1422.17	-0.0654399	0.167203	-0.39138	0.695516	0.924475	AIDA
ENSG00000126878	492.488	-0.77731	0.429053	-1.81169	0.0700344	0.418433	AIF1L
ENSG00000156709	1296.99	-0.0292177	0.132856	-0.219919	0.825934	0.959982	AIFM1
ENSG00000042286	555.181	-0.18159	0.194108	-0.935511	0.349525	0.759751	AIFM2
ENSG00000146416	1891.81	-0.228349	0.115704	-1.97356	0.0484323	0.353114	AIG1
ENSG00000163568	415.011	-0.426744	0.346646	-1.23106	0.218299	0.650562	AIM2
ENSG00000164022	2134.46	0.188432	0.151982	1.23983	0.215037	0.64547	AIMP1
ENSG00000106305	711.5	0.579391	0.159467	3.63329	0.000279825	0.0170887	AIMP2
ENSG00000110711	1199.54	-0.300309	0.149808	-2.00462	0.0450032	0.34201	AIP
ENSG00000129474	4523.02	0.802016	0.254564	3.15055	0.00162965	0.0529294	AJUBA
ENSG00000106992	388.217	0.231924	0.25359	0.914565	0.36042	0.767751	AK1
ENSG00000004455	4249.25	0.530686	0.100339	5.28893	1.23e-07	4.02e-05	AK2
ENSG00000147853	1615.67	-0.417899	0.175104	-2.38657	0.0170063	0.208859	AK3
ENSG00000162433	1500.7	0.257927	0.156329	1.6499	0.0989639	0.482983	AK4
ENSG00000085231	489.51	-0.283383	0.188962	-1.49968	0.133697	0.534387	AK6
ENSG00000165695	237.877	0.80264	0.269916	2.97367	0.00294262	0.0773873	AK8
ENSG00000155085	81.8454	-0.152188	0.290304	-0.524237	0.600114	0.887585	AK9
ENSG00000121057	1489.99	-0.0475447	0.169231	-0.280946	0.778752	0.948727	AKAP1
ENSG00000108599	828.1	0.00458376	0.136673	0.0335382	0.973245	0.995161	AKAP10
ENSG00000023516	2174.07	0.0621032	0.147005	0.422457	0.672692	0.917182	AKAP11
ENSG00000131016	7300.17	1.41048	0.347401	4.06009	4.91e-05	0.00504709	AKAP12
ENSG00000170776	3564.45	0.206118	0.175582	1.17392	0.240428	0.674308	AKAP13
ENSG00000197976	587.613	0.0735114	0.148013	0.496654	0.619433	0.895961	AKAP17A
ENSG00000105127	954.262	0.148767	0.144978	1.02613	0.304829	0.729971	AKAP8
ENSG00000011243	1176.41	-0.0404263	0.133187	-0.303531	0.761485	0.943078	AKAP8L
ENSG00000127914	1690.12	-0.023988	0.226779	-0.105777	0.915759	0.98314	AKAP9
ENSG00000166452	286.669	0.0355245	0.258568	0.137389	0.890723	0.975416	AKIP1
ENSG00000174574	2454.86	-0.13456	0.293365	-0.458677	0.646466	0.90663	AKIRIN1
ENSG00000135334	1052.96	0.0255092	0.105792	0.241126	0.809457	0.957005	AKIRIN2
ENSG00000117448	1895.76	-0.111435	0.106429	-1.04704	0.295081	0.723954	AKR1A1
ENSG00000085662	4231.83	0.124775	0.25971	0.48044	0.630914	0.90007	AKR1B1
ENSG00000198074	2959.16	-1.00445	0.26952	-3.72683	0.000193903	0.0129529	AKR1B10
ENSG00000187134	2304.66	-0.705933	0.133082	-5.30449	1.13e-07	3.78e-05	AKR1C1
ENSG00000151632	877.398	-0.4807	0.167154	-2.87579	0.00403015	0.0943871	AKR1C2
ENSG00000196139	1809.61	-0.537056	0.17467	-3.07469	0.00210724	0.0629043	AKR1C3
ENSG00000165568	141.52	0.194452	0.251763	0.772362	0.4399	0.817533	AKR1E2
ENSG00000053371	1001.25	0.155656	0.160973	0.966966	0.333561	0.749839	AKR7A2
ENSG00000162482	43.224	0.732747	0.382654	1.91491	0.0555044	0.376777	AKR7A3
ENSG00000142208	3054.07	-0.0362652	0.163797	-0.221403	0.824778	0.959969	AKT1
ENSG00000204673	1601.48	0.0357316	0.158313	0.225702	0.821434	0.959365	AKT1S1
ENSG00000105221	2388.42	-0.146787	0.10263	-1.43025	0.152644	0.560115	AKT2
ENSG00000117020	127.635	0.41203	0.513822	0.801894	0.422614	0.807369	AKT3
ENSG00000166971	351.095	-0.0617317	0.176533	-0.349688	0.726573	0.934124	AKTIP
ENSG00000148218	750.305	-0.134458	0.137849	-0.975402	0.329361	0.747571	ALAD
ENSG00000023330	1340.68	0.0192097	0.137938	0.139263	0.889242	0.975416	ALAS1
ENSG00000170017	8498.37	-0.191148	0.159512	-1.19833	0.230788	0.664477	ALCAM
ENSG00000161618	1033.16	-0.133379	0.153316	-0.869959	0.384323	0.783559	ALDH16A1
ENSG00000059573	2174.44	0.187047	0.124478	1.50265	0.13293	0.53316	ALDH18A1
ENSG00000165092	57.5688	-1.36085	0.617172	-2.20497	0.0274563	0.266861	ALDH1A1
ENSG00000128918	56.0132	-0.371126	0.414061	-0.896307	0.370089	0.775989	ALDH1A2
ENSG00000184254	32467.5	-0.209174	0.173834	-1.2033	0.228861	0.663102	ALDH1A3
ENSG00000137124	736.587	0.22716	0.16809	1.35142	0.176561	0.595817	ALDH1B1
ENSG00000144908	360.808	-0.862667	0.209951	-4.10889	3.98e-05	0.00449954	ALDH1L1
ENSG00000111275	309.182	-0.188081	0.199681	-0.941904	0.346242	0.757569	ALDH2
ENSG00000108602	4974.49	-0.962262	0.212777	-4.52241	6.11e-06	0.00108381	ALDH3A1
ENSG00000072210	1360.6	-0.284188	0.222111	-1.27949	0.200726	0.626623	ALDH3A2
ENSG00000006534	392.786	-0.603888	0.327208	-1.84558	0.0649538	0.404429	ALDH3B1
ENSG00000159423	880.776	-0.802183	0.247637	-3.23936	0.001198	0.0439555	ALDH4A1
ENSG00000112294	260.345	-0.96964	0.338513	-2.86441	0.00417782	0.096208	ALDH5A1
ENSG00000119711	142.916	-0.211747	0.312853	-0.676827	0.498516	0.84715	ALDH6A1
ENSG00000164904	1063.02	-0.507389	0.140236	-3.6181	0.000296778	0.0175769	ALDH7A1
ENSG00000143149	1679.37	0.00167594	0.119554	0.0140183	0.988815	0.997298	ALDH9A1
ENSG00000285043	571.677	0.0766419	0.705045	0.108705	0.913436	0.982691	ALDOA
ENSG00000149925	13382.5	-0.051567	0.149786	-0.34427	0.730643	0.936108	ALDOA
ENSG00000109107	379.84	0.148444	0.149316	0.994158	0.320146	0.740749	ALDOC
ENSG00000033011	765.658	0.202414	0.135781	1.49074	0.136029	0.536689	ALG1
ENSG00000139133	318.023	-0.129259	0.190201	-0.679592	0.496763	0.84593	ALG10
ENSG00000175548	427.376	-0.612188	0.363163	-1.68571	0.0918511	0.470307	ALG10B
ENSG00000253710	506.191	1.3232	0.332192	3.98325	6.8e-05	0.00625112	ALG11
ENSG00000182858	360.125	-0.194249	0.166316	-1.16795	0.242828	0.675095	ALG12
ENSG00000101901	594.376	-0.154448	0.165461	-0.933439	0.350593	0.76057	ALG13
ENSG00000189366	211.97	-0.120641	0.25713	-0.469184	0.638938	0.903749	ALG1L
ENSG00000251287	33.6831	0.251542	0.446074	0.563902	0.572821	0.878482	ALG1L2
ENSG00000119523	1347.41	-0.221686	0.210607	-1.05261	0.292521	0.721883	ALG2
ENSG00000214160	1062.25	0.407112	0.161841	2.51552	0.0118858	0.174179	ALG3
ENSG00000120697	1100.77	0.034444	0.220589	0.156145	0.875918	0.972119	ALG5
ENSG00000088035	629.528	-0.0410513	0.183333	-0.223916	0.822822	0.959463	ALG6
ENSG00000159063	1447.4	0.323613	0.107239	3.01767	0.0025473	0.07069	ALG8
ENSG00000086848	567.62	0.162481	0.204975	0.792687	0.42796	0.811415	ALG9
ENSG00000100601	430.987	0.178494	0.155518	1.14774	0.251077	0.684218	ALKBH1
ENSG00000189046	187.898	0.141911	0.209754	0.676559	0.498686	0.84715	ALKBH2
ENSG00000166199	594.754	0.00147587	0.201318	0.00733107	0.994151	0.998305	ALKBH3
ENSG00000160993	260.059	-0.164052	0.182661	-0.898124	0.36912	0.775139	ALKBH4
ENSG00000091542	1397.09	0.212175	0.128697	1.64864	0.0992205	0.483248	ALKBH5
ENSG00000239382	221.644	0.236227	0.218245	1.0824	0.279076	0.707078	ALKBH6
ENSG00000125652	176.65	0.0764663	0.22279	0.343221	0.731432	0.93648	ALKBH7
ENSG00000137760	220.18	0.0109903	0.205349	0.0535198	0.957318	0.991068	ALKBH8
ENSG00000116127	604.553	0.384879	0.137964	2.78971	0.00527554	0.110095	ALMS1
ENSG00000215067	78.9321	0.0938083	0.351725	0.266709	0.789693	0.952437	ALOX12-AS1
ENSG00000262943	162.981	0.0974793	0.276543	0.352493	0.724469	0.933454	ALOX12P2
ENSG00000012779	129.741	-0.166107	0.261513	-0.635176	0.525313	0.859726	ALOX5
ENSG00000163286	580.044	-0.252093	0.228604	-1.10275	0.270135	0.69912	ALPG
ENSG00000073331	218.559	-0.179543	0.332434	-0.540087	0.589137	0.883713	ALPK1
ENSG00000136383	267.079	-0.0612785	0.209131	-0.293015	0.76951	0.945616	ALPK3
ENSG00000163283	328.797	-0.351827	0.287669	-1.22302	0.22132	0.655057	ALPP
ENSG00000003393	1198.08	0.0796224	0.136305	0.584148	0.559121	0.873329	ALS2
ENSG00000178038	2435.7	-0.320162	0.189057	-1.69347	0.0903664	0.467497	ALS2CL
ENSG00000183684	1484.25	0.322728	0.18795	1.7171	0.0859618	0.4587	ALYREF
ENSG00000242110	513.982	-0.342225	0.292622	-1.16952	0.242196	0.675095	AMACR
ENSG00000110497	1220.52	0.221376	0.164679	1.34429	0.178856	0.598614	AMBRA1
ENSG00000123505	2216.67	0.283949	0.162709	1.74513	0.0809618	0.446306	AMD1
ENSG00000162066	332.252	-0.116009	0.204548	-0.567146	0.570615	0.877452	AMDHD2
ENSG00000184675	618.142	0.0167636	0.151643	0.110547	0.911976	0.982644	AMER1
ENSG00000159461	1582.16	0.230119	0.229694	1.00185	0.316417	0.737679	AMFR
ENSG00000104899	96.8679	0.73141	0.487176	1.50133	0.133271	0.533675	AMH
ENSG00000181754	159.118	0.289926	0.235499	1.23111	0.21828	0.650562	AMIGO1
ENSG00000139211	2661.52	-0.665404	0.223829	-2.97282	0.00295074	0.0773873	AMIGO2
ENSG00000101935	1571.27	-0.119818	0.22146	-0.541036	0.588483	0.883573	AMMECR1
ENSG00000144233	881.653	0.125052	0.126891	0.985507	0.324375	0.743379	AMMECR1L
ENSG00000166126	71.9716	-0.501981	0.403059	-1.24543	0.212974	0.643363	AMN
ENSG00000151743	104.199	-0.569713	0.352658	-1.61548	0.106206	0.493403	AMN1
ENSG00000166025	3350.23	0.139172	0.14044	0.990976	0.321697	0.741641	AMOTL1
ENSG00000114019	2332.73	0.427277	0.146505	2.91646	0.00354026	0.0872494	AMOTL2
ENSG00000116337	785.511	0.132886	0.171164	0.776369	0.437531	0.816441	AMPD2
ENSG00000133805	400.949	0.245998	0.329669	0.746197	0.455549	0.826057	AMPD3
ENSG00000196704	930.238	0.258577	0.162085	1.59532	0.11064	0.502423	AMZ2
ENSG00000153107	2525.04	0.20456	0.137373	1.48909	0.136465	0.536909	ANAPC1
ENSG00000164162	283.591	-0.107632	0.227088	-0.473968	0.635523	0.902378	ANAPC10
ENSG00000141552	789.336	0.0505097	0.269515	0.18741	0.85134	0.967979	ANAPC11
ENSG00000129055	726.279	0.49967	0.247386	2.0198	0.0434045	0.335123	ANAPC13
ENSG00000110200	528.498	-0.167641	0.179367	-0.934628	0.34998	0.759926	ANAPC15
ENSG00000176248	921.597	-0.0188854	0.140603	-0.134317	0.893152	0.975416	ANAPC2
ENSG00000053900	698.719	-0.0163268	0.185536	-0.0879978	0.929878	0.984915	ANAPC4
ENSG00000089053	3768.15	0.148031	0.111761	1.32453	0.185328	0.607209	ANAPC5
ENSG00000196510	1188.75	0.0444608	0.144794	0.307063	0.758795	0.942467	ANAPC7
ENSG00000013523	880.449	0.0958829	0.13257	0.723265	0.469517	0.834658	ANGEL1
ENSG00000174606	353.546	0.0087427	0.189724	0.046081	0.963246	0.9923	ANGEL2
ENSG00000167772	221.922	-0.25665	0.245835	-1.04399	0.296489	0.724625	ANGPTL4
ENSG00000029534	2230.06	-0.437903	0.1548	-2.82883	0.00467181	0.102134	ANK1
ENSG00000151150	1135.54	-0.28842	0.130904	-2.20329	0.027574	0.267083	ANK3
ENSG00000166839	162.932	-0.388576	0.312855	-1.24203	0.214224	0.644688	ANKDD1A
ENSG00000132623	756.472	-0.0131569	0.181163	-0.0726245	0.942105	0.988045	ANKEF1
ENSG00000185722	2175.17	-0.153262	0.138364	-1.10767	0.268004	0.697488	ANKFY1
ENSG00000154122	1374.12	-0.327561	0.14075	-2.32725	0.0199518	0.228807	ANKH
ENSG00000131503	1453.63	-0.393379	0.289233	-1.36008	0.173806	0.592493	ANKHD1
ENSG00000254996	1923.36	0.323973	0.272786	1.18765	0.234973	0.668825	ANKHD1-EIF4EBP3
ENSG00000001629	3105.16	-0.0806727	0.131116	-0.615275	0.538373	0.864653	ANKIB1
ENSG00000160117	111.964	0.0153832	0.307837	0.0499721	0.960145	0.991068	ANKLE1
ENSG00000176915	3684.66	-0.00341383	0.121777	-0.0280334	0.977635	0.996083	ANKLE2
ENSG00000144504	210.491	0.0323577	0.235984	0.137118	0.890938	0.975416	ANKMY1
ENSG00000106524	701.558	-0.107226	0.194547	-0.551158	0.581525	0.881578	ANKMY2
ENSG00000164331	256.535	0.0597545	0.292869	0.204032	0.838329	0.964659	ANKRA2
ENSG00000148677	1952.92	0.162753	0.20812	0.782017	0.434204	0.814749	ANKRD1
ENSG00000088448	3333.33	0.0666933	0.167424	0.398351	0.690371	0.923804	ANKRD10
ENSG00000167522	4575.33	0.273385	0.126995	2.15272	0.0313408	0.287479	ANKRD11
ENSG00000101745	413.761	1.13253	0.368455	3.07372	0.00211409	0.0629649	ANKRD12
ENSG00000076513	1088.3	0.0585729	0.118115	0.495898	0.619967	0.895991	ANKRD13A
ENSG00000198720	133.497	0.380034	0.282349	1.34597	0.178311	0.597807	ANKRD13B
ENSG00000118454	755.452	-0.10114	0.134237	-0.753443	0.451184	0.824009	ANKRD13C
ENSG00000172932	606.265	-0.0520952	0.159104	-0.327428	0.743344	0.938863	ANKRD13D
ENSG00000134461	88.36	-0.298715	0.274246	-1.08922	0.276056	0.704661	ANKRD16
ENSG00000132466	3867.92	0.0604811	0.105575	0.572871	0.566732	0.875703	ANKRD17
ENSG00000180071	174.859	0.0454544	0.286641	0.158576	0.874003	0.971858	ANKRD18A
ENSG00000230453	223.87	-0.0029126	0.193463	-0.0150551	0.987988	0.997189	ANKRD18B
ENSG00000152766	774.745	0.210468	0.186623	1.12777	0.259417	0.692655	ANKRD22
ENSG00000107890	413.372	-0.107937	0.170144	-0.634382	0.525832	0.860148	ANKRD26
ENSG00000105186	1921.73	-0.0225559	0.123597	-0.182496	0.855194	0.968298	ANKRD27
ENSG00000206560	1015.89	0.0715549	0.139591	0.512605	0.608227	0.890771	ANKRD28
ENSG00000154065	115.966	-0.759468	0.385728	-1.96892	0.0489624	0.355197	ANKRD29
ENSG00000164236	848.11	0.519177	0.225646	2.30085	0.0214003	0.236712	ANKRD33B
ENSG00000135976	210.853	-0.0937039	0.281058	-0.333397	0.738835	0.937251	ANKRD36
ENSG00000196912	142.618	-0.0663673	0.252864	-0.262463	0.792965	0.953489	ANKRD36B
ENSG00000174501	74.9252	-0.122163	0.367513	-0.332405	0.739584	0.937251	ANKRD36C
ENSG00000186352	86.315	-0.0221805	0.338778	-0.0654722	0.947798	0.989565	ANKRD37
ENSG00000213337	158.993	0.293	0.217177	1.34913	0.177295	0.596785	ANKRD39
ENSG00000154945	1039.48	-0.0299581	0.138971	-0.21557	0.829323	0.961448	ANKRD40
ENSG00000137494	222.909	-0.371699	0.297135	-1.25095	0.210954	0.640762	ANKRD42
ENSG00000065413	125.78	-0.679317	0.25222	-2.69335	0.00707378	0.130096	ANKRD44
ENSG00000186106	384.814	-0.306805	0.149082	-2.05796	0.0395942	0.326908	ANKRD46
ENSG00000168876	505.21	0.632642	0.378749	1.67034	0.0948512	0.475559	ANKRD49
ENSG00000151458	850.734	-0.42041	0.132326	-3.17708	0.00148765	0.049526	ANKRD50
ENSG00000139645	3149.18	0.0238806	0.124802	0.191348	0.848253	0.967274	ANKRD52
ENSG00000100124	330.527	0.135978	0.210278	0.646659	0.517853	0.856279	ANKRD54
ENSG00000235098	255.291	-0.558798	0.271206	-2.06042	0.0393584	0.325692	ANKRD65
ENSG00000156381	720.598	-0.480725	0.188117	-2.55546	0.0106048	0.164975	ANKRD9
ENSG00000064999	1257.23	0.093174	0.111257	0.837467	0.40233	0.796271	ANKS1A
ENSG00000168096	271.339	0.0540206	0.176879	0.30541	0.760054	0.94263	ANKS3
ENSG00000165138	1332.82	0.00443358	0.173855	0.0255016	0.979655	0.99652	ANKS6
ENSG00000163516	613.7	0.00221387	0.122765	0.0180334	0.985612	0.997177	ANKZF1
ENSG00000011426	5980.36	-0.0846502	0.142905	-0.592352	0.553615	0.871173	ANLN
ENSG00000131620	9442.67	-0.207047	0.155237	-1.33375	0.182287	0.603614	ANO1
ENSG00000160746	578.12	-0.0357799	0.142133	-0.251736	0.801245	0.955634	ANO10
ENSG00000177119	2992.49	-0.0497526	0.120122	-0.414183	0.67874	0.919185	ANO6
ENSG00000074855	193.169	-0.485395	0.219933	-2.20702	0.0273128	0.266481	ANO8
ENSG00000185101	497.069	-0.140389	0.265263	-0.529244	0.596636	0.886429	ANO9
ENSG00000140350	3208.14	-0.0709023	0.109975	-0.644711	0.519115	0.857306	ANP32A
ENSG00000136938	8000.36	0.0247141	0.130766	0.188995	0.850097	0.967979	ANP32B
ENSG00000143401	1353.86	0.013415	0.206624	0.0649246	0.948234	0.989599	ANP32E
ENSG00000169604	1450.84	-0.262924	0.120534	-2.18131	0.0291601	0.275728	ANTXR1
ENSG00000163297	2187.81	0.343383	0.192723	1.78175	0.0747903	0.430681	ANTXR2
ENSG00000135046	21727.3	0.0893428	0.106818	0.836404	0.402928	0.796815	ANXA1
ENSG00000109511	4088.38	0.14839	0.152769	0.971332	0.331383	0.748935	ANXA10
ENSG00000122359	6779.65	-0.0618719	0.103457	-0.598045	0.54981	0.869548	ANXA11
ENSG00000182718	68682.3	0.116964	0.126569	0.924113	0.355428	0.764869	ANXA2
ENSG00000213406	33.7999	-0.0485066	0.42293	-0.114692	0.908689	0.981467	ANXA2P1
ENSG00000231991	8563.57	0.133445	0.124392	1.07278	0.283371	0.711959	ANXA2P2
ENSG00000138772	5644.25	0.0014416	0.138954	0.0103747	0.991722	0.99769	ANXA3
ENSG00000196975	3034.15	-0.315604	0.151108	-2.0886	0.0367439	0.314676	ANXA4
ENSG00000164111	8591.25	0.33597	0.129032	2.60377	0.00922043	0.152943	ANXA5
ENSG00000197043	592.428	0.383403	0.227618	1.68441	0.0921022	0.470719	ANXA6
ENSG00000138279	3153.07	0.225816	0.138782	1.62712	0.103711	0.489823	ANXA7
ENSG00000265190	7157.51	-0.496171	0.135338	-3.66615	0.000246229	0.0153507	ANXA8
ENSG00000264230	7107.12	-0.34577	0.111963	-3.08826	0.00201332	0.0613072	ANXA8L1
ENSG00000143412	106.124	-0.469693	0.327791	-1.4329	0.151886	0.560073	ANXA9
ENSG00000002726	237.849	0.618793	0.23975	2.58099	0.00985169	0.157895	AOC1
ENSG00000138356	264.591	1.16393	0.324482	3.58705	0.000334446	0.0189258	AOX1
ENSG00000138660	810.57	-0.329739	0.202932	-1.62487	0.10419	0.490733	AP1AR
ENSG00000100280	3088.24	0.189216	0.167106	1.13231	0.257504	0.691359	AP1B1
ENSG00000166747	3419.2	-0.0025557	0.150461	-0.0169857	0.986448	0.997177	AP1G1
ENSG00000213983	1248.74	-0.0512319	0.148389	-0.345254	0.729903	0.935703	AP1G2
ENSG00000072958	639.903	-0.279938	0.217841	-1.28505	0.198774	0.624411	AP1M1
ENSG00000129354	1379.86	-0.285543	0.163664	-1.7447	0.081038	0.446391	AP1M2
ENSG00000106367	2683.89	0.0334422	0.171607	0.194877	0.845489	0.966339	AP1S1
ENSG00000182287	114.168	0.0520135	0.27133	0.191698	0.847978	0.967274	AP1S2
ENSG00000152056	804.993	-0.512297	0.197971	-2.58773	0.00966107	0.157238	AP1S3
ENSG00000196961	3201.48	-0.0205761	0.137941	-0.149166	0.881422	0.97452	AP2A1
ENSG00000183020	1139.94	0.0607198	0.119289	0.509016	0.610741	0.891831	AP2A2
ENSG00000006125	5563.31	0.093161	0.134652	0.691864	0.489023	0.841803	AP2B1
ENSG00000161203	6070.53	0.0956479	0.133023	0.719035	0.472119	0.834671	AP2M1
ENSG00000042753	3279.56	0.0630861	0.137891	0.457508	0.647306	0.906943	AP2S1
ENSG00000132842	1690.27	-0.363444	0.123803	-2.93567	0.00332833	0.0832817	AP3B1
ENSG00000065000	3909.37	0.123431	0.171471	0.719838	0.471625	0.834671	AP3D1
ENSG00000185009	1912.58	0.038216	0.0967963	0.394808	0.692984	0.92423	AP3M1
ENSG00000070718	1003.58	0.00443922	0.33714	0.0131673	0.989494	0.997298	AP3M2
ENSG00000177879	1740.85	-0.099441	0.168537	-0.590024	0.555175	0.871191	AP3S1
ENSG00000157823	839.39	-0.281575	0.302734	-0.930107	0.352316	0.762085	AP3S2
ENSG00000134262	451.953	0.505693	0.150751	3.35451	0.00079507	0.0343046	AP4B1
ENSG00000081014	792.064	0.257793	0.251826	1.02369	0.30598	0.730082	AP4E1
ENSG00000221838	330.032	0.29776	0.22725	1.31028	0.190103	0.614945	AP4M1
ENSG00000100478	158.289	0.15956	0.303826	0.525169	0.599466	0.887356	AP4S1
ENSG00000254470	991.761	-0.203372	0.167358	-1.21519	0.224294	0.658183	AP5B1
ENSG00000053770	1460.99	-0.33375	0.269098	-1.24025	0.214881	0.645346	AP5M1
ENSG00000125843	244.072	0.547001	0.27697	1.97495	0.0482739	0.352308	AP5S1
ENSG00000242802	701.234	0.4647	0.177391	2.61964	0.00880237	0.147517	AP5Z1
ENSG00000120868	581.318	0.105174	0.161983	0.649292	0.51615	0.855777	APAF1
ENSG00000011132	213.316	0.10722	0.203941	0.525737	0.599071	0.887356	APBA3
ENSG00000163697	1032.2	0.0136761	0.13701	0.0998185	0.920488	0.983349	APBB2
ENSG00000113108	190.763	-0.0296918	0.206757	-0.143607	0.88581	0.975381	APBB3
ENSG00000134982	224.802	-0.175567	0.538651	-0.325937	0.744472	0.938904	APC
ENSG00000164062	3364.02	-0.114962	0.126332	-0.909996	0.362825	0.769199	APEH
ENSG00000100823	1046.19	0.486778	0.276019	1.76357	0.0778045	0.438933	APEX1
ENSG00000169188	1576.86	-0.0596987	0.134606	-0.443506	0.6574	0.911395	APEX2
ENSG00000117362	2103.97	0.0861656	0.110694	0.778411	0.436327	0.815629	APH1A
ENSG00000138613	167.099	-0.373074	0.338548	-1.10198	0.27047	0.699257	APH1B
ENSG00000166181	2398.63	0.0926322	0.166459	0.556487	0.577878	0.881166	API5
ENSG00000149089	403.698	-0.0909981	0.159972	-0.568839	0.569465	0.876809	APIP
ENSG00000105290	47.5423	-0.0719654	0.475519	-0.151341	0.879707	0.973871	APLP1
ENSG00000084234	42852.1	-0.494576	0.127225	-3.88742	0.000101316	0.0084218	APLP2
ENSG00000101474	7073.06	-0.30039	0.123371	-2.43485	0.0148982	0.194668	APMAP
ENSG00000128383	65.7599	-0.0756782	0.482831	-0.156738	0.875451	0.972009	APOBEC3A
ENSG00000179750	869.631	0.585421	0.174206	3.36051	0.000778	0.0337119	APOBEC3B
ENSG00000244509	1086.8	0.00653516	0.130196	0.050195	0.959967	0.991068	APOBEC3C
ENSG00000128394	93.6022	-0.0510364	0.265811	-0.192003	0.84774	0.967274	APOBEC3F
ENSG00000239713	189.29	-0.497257	0.204373	-2.43309	0.0149706	0.194923	APOBEC3G
ENSG00000130208	51.0899	-0.222651	0.422283	-0.527255	0.598017	0.88718	APOC1
ENSG00000189058	82.4831	-0.367787	0.314851	-1.16813	0.242755	0.675095	APOD
ENSG00000100342	181.876	-0.227703	0.239874	-0.94926	0.342489	0.755679	APOL1
ENSG00000128335	395.122	-0.207757	0.184226	-1.12773	0.259434	0.692655	APOL2
ENSG00000128284	435.175	-0.292895	0.153017	-1.91413	0.0556036	0.377003	APOL3
ENSG00000221963	2391.28	-0.329299	0.117934	-2.79223	0.00523458	0.109554	APOL6
ENSG00000178878	435.503	-0.625015	0.343404	-1.82006	0.0687497	0.415748	APOLD1
ENSG00000184831	245.274	0.0821377	0.195182	0.420827	0.673881	0.917866	APOO
ENSG00000155008	969.155	-0.167555	0.173205	-0.967383	0.333352	0.749839	APOOL
ENSG00000256053	607.683	-0.0897853	0.21641	-0.414885	0.678226	0.919185	APOPT1
ENSG00000142192	14170.5	-0.278861	0.158843	-1.75558	0.0791603	0.442174	APP
ENSG00000062725	740.713	-0.134693	0.136996	-0.983187	0.325515	0.743909	APPBP2
ENSG00000157500	1046.96	-0.0438556	0.174839	-0.250834	0.801942	0.955692	APPL1
ENSG00000136044	407.708	-0.173099	0.166584	-1.03911	0.298753	0.725628	APPL2
ENSG00000198931	1508.54	-0.0825829	0.135455	-0.609671	0.54208	0.866001	APRT
ENSG00000214293	190.217	-0.221911	0.243643	-0.910804	0.362399	0.769199	APTR
ENSG00000137074	1005.32	0.185117	0.152669	1.21254	0.225307	0.659689	APTX
ENSG00000165272	22637.2	-0.581608	0.214691	-2.70905	0.00674762	0.12563	AQP3
ENSG00000161798	111.236	-1.68792	0.446398	-3.78121	0.000156071	0.0112562	AQP5
ENSG00000021776	3167.55	0.0958302	0.126476	0.757692	0.448635	0.822423	AQR
ENSG00000078061	821.843	0.161206	0.145142	1.11068	0.266705	0.696367	ARAF
ENSG00000186635	3463.77	-0.173903	0.121501	-1.43129	0.152346	0.560115	ARAP1
ENSG00000047365	939.224	-0.278521	0.189734	-1.46796	0.142116	0.544094	ARAP2
ENSG00000120318	1381.26	0.152336	0.121183	1.25707	0.208727	0.63793	ARAP3
ENSG00000095139	6055.55	0.217703	0.336587	0.646795	0.517765	0.85623	ARCN1
ENSG00000109321	2934.27	-0.11913	0.165444	-0.720062	0.471487	0.834671	AREG
ENSG00000119682	2039.95	0.0210014	0.146982	0.142885	0.886381	0.975399	AREL1
ENSG00000143761	8003.35	-0.216356	0.0905013	-2.39065	0.0168188	0.207945	ARF1
ENSG00000134287	6754.02	-0.125527	0.126147	-0.995085	0.319695	0.740461	ARF3
ENSG00000168374	3024.89	-0.151903	0.252148	-0.602435	0.546884	0.868276	ARF4
ENSG00000004059	2490.72	-0.125007	0.0989854	-1.26288	0.206632	0.635651	ARF5
ENSG00000165527	3819.63	-0.262572	0.118373	-2.21817	0.0265429	0.261878	ARF6
ENSG00000101199	1353.15	0.306249	0.116081	2.63823	0.00833403	0.143383	ARFGAP1
ENSG00000149182	2142.43	-0.0155891	0.114627	-0.135999	0.891822	0.975416	ARFGAP2
ENSG00000242247	1003.72	-0.0962852	0.144042	-0.668452	0.503845	0.850683	ARFGAP3
ENSG00000066777	3116.76	-0.208248	0.120231	-1.73207	0.0832605	0.451701	ARFGEF1
ENSG00000124198	3929.76	0.130509	0.108311	1.20495	0.228224	0.662703	ARFGEF2
ENSG00000164144	458.478	0.0716625	0.264087	0.271359	0.786115	0.950303	ARFIP1
ENSG00000132254	874.151	-0.0305925	0.186773	-0.163795	0.869893	0.971858	ARFIP2
ENSG00000101246	1106.8	-0.0980514	0.143808	-0.681823	0.495351	0.844828	ARFRP1
ENSG00000081181	523.892	-0.133883	0.234917	-0.569917	0.568734	0.876299	ARG2
ENSG00000134884	4486.19	-0.819677	0.156954	-5.22242	1.77e-07	5.53e-05	ARGLU1
ENSG00000175220	1907.31	0.344866	0.136033	2.53517	0.0112393	0.17083	ARHGAP1
ENSG00000071205	134.319	0.0611396	0.252577	0.242063	0.808731	0.956719	ARHGAP10
ENSG00000198826	1272.5	0.550021	0.305448	1.8007	0.0717496	0.422966	ARHGAP11A
ENSG00000285077	266.186	-0.0537539	0.410032	-0.131097	0.895699	0.97589	ARHGAP11B
ENSG00000165322	826.673	-0.20336	0.216627	-0.938754	0.347857	0.759381	ARHGAP12
ENSG00000140750	984.502	0.211436	0.182698	1.15729	0.247152	0.679945	ARHGAP17
ENSG00000146376	1899.63	-0.145522	0.166062	-0.876308	0.380863	0.781132	ARHGAP18
ENSG00000213390	524.944	-0.0104343	0.143516	-0.0727044	0.942041	0.988045	ARHGAP19
ENSG00000107863	2700.82	0.118988	0.115719	1.02825	0.303834	0.729489	ARHGAP21
ENSG00000275832	5184.08	-0.204308	0.130451	-1.56617	0.117309	0.512613	ARHGAP23
ENSG00000138639	305.342	0.114781	0.223184	0.514288	0.607051	0.889862	ARHGAP24
ENSG00000163219	324.556	-0.220128	0.199095	-1.10564	0.268882	0.698333	ARHGAP25
ENSG00000145819	682.62	0.319909	0.316245	1.01158	0.311737	0.733861	ARHGAP26
ENSG00000159314	1217.69	0.0035791	0.125309	0.0285621	0.977214	0.995965	ARHGAP27
ENSG00000215769	196.486	-1.05313	0.302069	-3.48638	0.000489608	0.0243365	ARHGAP27P1
ENSG00000137962	2975.66	0.0602117	0.147851	0.407245	0.683828	0.921236	ARHGAP29
ENSG00000134909	1489.49	-0.299379	0.116202	-2.57636	0.00998453	0.159355	ARHGAP32
ENSG00000160007	4370.92	0.32829	0.197696	1.66058	0.0967974	0.479279	ARHGAP35
ENSG00000147799	337.198	0.0398112	0.162852	0.244463	0.806873	0.956383	ARHGAP39
ENSG00000089820	173.636	-0.0749616	0.192096	-0.39023	0.696366	0.924475	ARHGAP4
ENSG00000165895	815.988	-0.160158	0.150826	-1.06188	0.288292	0.717585	ARHGAP42
ENSG00000180448	525.998	0.318129	0.155053	2.05174	0.0401947	0.328547	ARHGAP45
ENSG00000100852	3370.14	-0.0385034	0.186354	-0.206614	0.836311	0.964616	ARHGAP5
ENSG00000258655	112.414	0.0563642	0.25519	0.220872	0.825192	0.959982	ARHGAP5-AS1
ENSG00000241484	345.353	0.293243	0.252225	1.16262	0.244982	0.677134	ARHGAP8
ENSG00000141522	3398.27	0.1018	0.149172	0.682435	0.494964	0.844729	ARHGDIA
ENSG00000111348	6881.21	0.110636	0.145715	0.759264	0.447694	0.82203	ARHGDIB
ENSG00000076928	2042.56	0.101865	0.141614	0.719313	0.471948	0.834671	ARHGEF1
ENSG00000104728	916.027	0.481414	0.311684	1.54456	0.122453	0.519562	ARHGEF10
ENSG00000074964	328.979	-0.151611	0.248952	-0.608998	0.542526	0.86631	ARHGEF10L
ENSG00000132694	1093.8	0.0575185	0.135504	0.424479	0.671217	0.916475	ARHGEF11
ENSG00000196914	5250.73	-0.0615942	0.0965683	-0.63783	0.523584	0.859538	ARHGEF12
ENSG00000130762	2315.75	-0.45774	0.181762	-2.51835	0.0117908	0.173651	ARHGEF16
ENSG00000110237	1192.15	-0.416584	0.201195	-2.07054	0.0384014	0.320659	ARHGEF17
ENSG00000104880	3390.93	0.0410515	0.130157	0.315399	0.752459	0.94006	ARHGEF18
ENSG00000142632	604.148	0.0219521	0.142051	0.154537	0.877186	0.972639	ARHGEF19
ENSG00000116584	2951.04	0.381446	0.121669	3.13511	0.00171791	0.0548279	ARHGEF2
ENSG00000214944	879.245	-0.0520803	0.118432	-0.43975	0.660118	0.912469	ARHGEF28
ENSG00000163947	843.024	0.0614501	0.12347	0.497691	0.618702	0.895431	ARHGEF3
ENSG00000204959	923.417	-0.0326793	0.13643	-0.239532	0.810693	0.957293	ARHGEF34P
ENSG00000213214	656.652	-0.16728	0.139669	-1.19769	0.231036	0.664563	ARHGEF35
ENSG00000183111	594.358	-0.176538	0.247069	-0.714528	0.474901	0.835562	ARHGEF37
ENSG00000137135	440.589	-0.0787587	0.248115	-0.317428	0.750919	0.939909	ARHGEF39
ENSG00000136002	458.545	-0.1539	0.181664	-0.847166	0.396903	0.791356	ARHGEF4
ENSG00000165801	821.32	0.25577	0.121698	2.10168	0.0355809	0.309561	ARHGEF40
ENSG00000050327	1014.74	0.169387	0.140124	1.20883	0.226727	0.661085	ARHGEF5
ENSG00000102606	1418.27	0.17348	0.148488	1.1683	0.242684	0.675095	ARHGEF7
ENSG00000131089	276.704	-0.282238	0.241149	-1.17039	0.241844	0.675095	ARHGEF9
ENSG00000117713	3149.23	0.167186	0.170098	0.98288	0.325666	0.743944	ARID1A
ENSG00000049618	1254.83	0.054255	0.213454	0.254176	0.799359	0.955537	ARID1B
ENSG00000189079	1281.08	0.00944306	0.120827	0.0781533	0.937706	0.987442	ARID2
ENSG00000116017	191.342	0.314347	0.214698	1.46413	0.143158	0.546092	ARID3A
ENSG00000179361	706.557	0.431793	0.27093	1.59374	0.110994	0.503096	ARID3B
ENSG00000032219	766.721	-0.130257	0.208394	-0.625048	0.531939	0.863419	ARID4A
ENSG00000054267	1013.96	-0.0200468	0.130095	-0.154093	0.877536	0.972741	ARID4B
ENSG00000196843	102.938	-0.0550232	0.364974	-0.150759	0.880166	0.974114	ARID5A
ENSG00000150347	479.094	-0.463797	0.255965	-1.81195	0.0699933	0.418433	ARID5B
ENSG00000166233	1390.7	0.0456169	0.123248	0.370122	0.711292	0.928428	ARIH1
ENSG00000177479	2124.31	0.11463	0.122506	0.935714	0.34942	0.759751	ARIH2
ENSG00000120805	1238.35	-0.0901897	0.120615	-0.747751	0.45461	0.825676	ARL1
ENSG00000169379	468.849	-0.0953874	0.153398	-0.621829	0.534055	0.864203	ARL13B
ENSG00000179674	652.141	0.0451539	0.149031	0.302983	0.761903	0.943078	ARL14
ENSG00000152219	667.052	-0.17939	0.139088	-1.28976	0.197135	0.622777	ARL14EP
ENSG00000268223	100.327	1.06224	0.343869	3.08909	0.00200768	0.0613072	ARL14EPL
ENSG00000185305	260.363	-0.278256	0.17951	-1.55009	0.121121	0.519363	ARL15
ENSG00000214087	124.222	-0.000542123	0.231228	-0.00234454	0.998129	0.99908	ARL16
ENSG00000185829	393.602	-0.11805	0.19436	-0.607378	0.5436	0.86662	ARL17A
ENSG00000228696	133.465	-0.167188	0.286441	-0.583672	0.559441	0.873409	ARL17A
ENSG00000213465	691.318	0.140253	0.145792	0.962006	0.336046	0.751747	ARL2
ENSG00000102931	741.863	1.2998	0.302191	4.30124	1.7e-05	0.00240277	ARL2BP
ENSG00000138175	366.722	-0.281476	0.168551	-1.66997	0.094925	0.475559	ARL3
ENSG00000122644	465.362	0.00738228	0.205019	0.0360079	0.971276	0.995014	ARL4A
ENSG00000188042	532.321	-0.0901141	0.270274	-0.333417	0.738819	0.937251	ARL4C
ENSG00000175906	846.816	-0.324209	0.151964	-2.13346	0.0328868	0.296849	ARL4D
ENSG00000162980	940.465	-0.226433	0.17815	-1.27103	0.20372	0.631948	ARL5A
ENSG00000165997	1469.9	-0.394823	0.170331	-2.31797	0.0204508	0.231606	ARL5B
ENSG00000113966	159.038	-0.103432	0.2453	-0.421655	0.673277	0.91747	ARL6
ENSG00000170540	8904.79	-0.140135	0.134169	-1.04447	0.296268	0.724425	ARL6IP1
ENSG00000182196	1070.75	-0.153594	0.116432	-1.31917	0.187113	0.61015	ARL6IP4
ENSG00000144746	2644.6	-0.345255	0.21308	-1.62031	0.105166	0.492147	ARL6IP5
ENSG00000177917	642.413	-0.293943	0.199785	-1.4713	0.141211	0.541756	ARL6IP6
ENSG00000143862	304.073	-0.194409	0.167231	-1.16252	0.245026	0.677134	ARL8A
ENSG00000134108	2512.12	-0.128375	0.147993	-0.867442	0.3857	0.784354	ARL8B
ENSG00000104442	1472.4	0.0400807	0.179567	0.223208	0.823374	0.959548	ARMC1
ENSG00000170632	1045.14	-0.0691164	0.168401	-0.410428	0.681492	0.920357	ARMC10
ENSG00000140691	282.194	0.10482	0.299461	0.35003	0.726316	0.934124	ARMC5
ENSG00000105676	587.107	0.176658	0.283812	0.622447	0.533648	0.864203	ARMC6
ENSG00000125449	211.401	-0.191727	0.219136	-0.87492	0.381617	0.781779	ARMC7
ENSG00000114098	1238.98	0.122977	0.128236	0.958988	0.337565	0.752541	ARMC8
ENSG00000135931	158.452	0.142899	0.215184	0.664077	0.506641	0.851812	ARMC9
ENSG00000184867	113.353	-0.0218802	0.306574	-0.0713701	0.943103	0.988045	ARMCX2
ENSG00000102401	1025.7	-0.0664985	0.390346	-0.170358	0.864729	0.970705	ARMCX3
ENSG00000196440	90.7507	0.0592028	0.545039	0.108621	0.913503	0.982691	ARMCX4
ENSG00000125962	403.573	0.0426567	0.1755	0.243058	0.80796	0.956717	ARMCX5
ENSG00000198960	402.916	0.173771	0.243853	0.712605	0.47609	0.836147	ARMCX6
ENSG00000120029	655.463	0.0339736	0.128054	0.265307	0.790773	0.952722	ARMH3
ENSG00000146476	1094.91	-0.422238	0.623012	-0.677737	0.497939	0.846663	ARMT1
ENSG00000143437	549.396	-0.0113744	0.174103	-0.0653311	0.94791	0.989565	ARNT
ENSG00000133794	348.399	-0.115377	0.230608	-0.500314	0.616854	0.894678	ARNTL
ENSG00000029153	4352.54	0.282362	0.129083	2.18745	0.02871	0.272879	ARNTL2
ENSG00000241685	4870.73	0.00363533	0.103435	0.0351461	0.971963	0.995161	ARPC1A
ENSG00000130429	5453.95	0.354815	0.31904	1.11213	0.266082	0.69636	ARPC1B
ENSG00000163466	10118.3	-0.0502788	0.163259	-0.30797	0.758105	0.942222	ARPC2
ENSG00000111229	5265.61	-0.0608415	0.194735	-0.312432	0.754712	0.940864	ARPC3
ENSG00000241553	3162.67	0.228283	0.131184	1.74018	0.0818277	0.448225	ARPC4
ENSG00000250151	26.5581	-0.635648	0.499854	-1.27167	0.203491	NA	ARPC4-TTLL3
ENSG00000162704	3790.42	0.0235695	0.223105	0.105643	0.915866	0.98314	ARPC5
ENSG00000136950	2869.82	0.11048	0.141183	0.78253	0.433903	0.814668	ARPC5L
ENSG00000242498	1013.37	-0.428495	0.17501	-2.4484	0.0143492	0.190741	ARPIN
ENSG00000128989	3775.46	-0.14016	0.16974	-0.825734	0.408955	0.799668	ARPP19
ENSG00000137486	180.103	-0.0625339	0.198485	-0.315056	0.752719	0.94006	ARRB1
ENSG00000141480	331.724	0.105623	0.21399	0.493587	0.621598	0.896839	ARRB2
ENSG00000197070	1102.23	-0.127425	0.165681	-0.769097	0.441836	0.818938	ARRDC1
ENSG00000203993	277.703	-0.176375	0.2662	-0.662566	0.507608	0.852433	ARRDC1-AS1
ENSG00000105643	622.487	0.0834712	0.174107	0.479425	0.631636	0.90025	ARRDC2
ENSG00000113369	1467.19	0.361033	0.156609	2.30531	0.0211494	0.235201	ARRDC3
ENSG00000140450	879.968	0.540494	0.240704	2.24547	0.024738	0.252582	ARRDC4
ENSG00000100299	457.675	-0.30849	0.169703	-1.81782	0.069091	0.416442	ARSA
ENSG00000113273	186.578	-0.0759315	0.205928	-0.368728	0.71233	0.928936	ARSB
ENSG00000006756	529.578	-0.136366	0.149354	-0.913034	0.361225	0.768528	ARSD
ENSG00000180801	696.494	-0.118393	0.180503	-0.655907	0.511884	0.854311	ARSJ
ENSG00000164291	141.523	-0.410865	0.314559	-1.30616	0.191498	0.616119	ARSK
ENSG00000117407	193.226	-0.216617	0.408809	-0.529873	0.5962	0.886196	ARTN
ENSG00000173409	268.436	-0.162456	0.214949	-0.755787	0.449777	0.823285	ARV1
ENSG00000099889	510.427	-0.243183	0.169404	-1.43552	0.15114	0.558305	ARVCF
ENSG00000104763	1365.91	-0.379127	0.184026	-2.06019	0.0393807	0.325693	ASAH1
ENSG00000204147	203.338	0.0158317	0.58977	0.0268439	0.978584	0.996234	ASAH2B
ENSG00000153317	2153.79	0.207865	0.103918	2.00027	0.0454708	0.343965	ASAP1
ENSG00000151693	1237.89	-0.0488279	0.111576	-0.437618	0.661663	0.913106	ASAP2
ENSG00000088280	195.838	-0.832473	0.293755	-2.8339	0.00459842	0.101434	ASAP3
ENSG00000065802	619.644	0.00804957	0.434957	0.0185066	0.985235	0.997177	ASB1
ENSG00000196372	554.31	0.0756802	0.163066	0.464107	0.642571	0.905639	ASB13
ENSG00000267080	65.8939	0.0518537	0.381953	0.135759	0.892012	0.975416	ASB16-AS1
ENSG00000115239	458.289	0.0366742	0.165436	0.221682	0.824562	0.959905	ASB3
ENSG00000148331	1212.16	0.336723	0.280788	1.19921	0.230446	0.664477	ASB6
ENSG00000183475	764.626	-0.0221546	0.118634	-0.186748	0.851858	0.967979	ASB7
ENSG00000177981	382.657	0.18866	0.190389	0.990919	0.321725	0.741641	ASB8
ENSG00000102048	72.245	0.590075	0.350281	1.68458	0.0920699	0.470719	ASB9
ENSG00000100325	1396.99	0.216691	0.205118	1.05642	0.290774	0.719854	ASCC2
ENSG00000112249	4428.62	-0.0607817	0.0976139	-0.622675	0.533498	0.864182	ASCC3
ENSG00000183734	95.7837	-0.329541	0.260318	-1.26592	0.205543	0.634481	ASCL2
ENSG00000111875	678.504	-0.0138723	0.14881	-0.0932215	0.925728	0.984121	ASF1A
ENSG00000105011	1293.73	-0.0708529	0.153028	-0.463007	0.643359	0.905639	ASF1B
ENSG00000116539	2267.22	0.0215449	0.12478	0.172664	0.862916	0.970203	ASH1L
ENSG00000235919	26.6113	-0.696168	0.500376	-1.39129	0.164138	NA	ASH1L-AS1
ENSG00000129691	1442.44	0.0526857	0.140003	0.37632	0.706679	0.926591	ASH2L
ENSG00000110881	108.707	-0.274902	0.378009	-0.727234	0.467082	0.832978	ASIC1
ENSG00000126522	776.921	0.201024	0.212892	0.944251	0.345041	0.756151	ASL
ENSG00000169093	112.635	-0.383431	0.266641	-1.43801	0.150432	0.55751	ASMTL
ENSG00000198356	1389.86	0.0865143	0.141504	0.611391	0.540941	0.865356	ASNA1
ENSG00000070669	663.878	0.403908	0.183208	2.20465	0.0274787	0.266861	ASNS
ENSG00000138381	850.935	0.167839	0.150173	1.11764	0.263721	0.694831	ASNSD1
ENSG00000198363	10342.3	-0.346662	0.133701	-2.59281	0.00951951	0.155707	ASPH
ENSG00000174939	409.742	0.0810738	0.184865	0.438558	0.660982	0.912764	ASPHD1
ENSG00000128203	121.67	0.139672	0.285191	0.489747	0.624313	0.898004	ASPHD2
ENSG00000066279	2943.85	-0.0762914	0.197606	-0.386079	0.699438	0.925283	ASPM
ENSG00000169696	241.305	-0.00102067	0.231749	-0.00440421	0.996486	0.998666	ASPSCR1
ENSG00000130707	3197.31	-0.237331	0.176861	-1.3419	0.179627	0.59973	ASS1
ENSG00000034533	244.624	0.0635156	0.214488	0.296126	0.767134	0.94492	ASTE1
ENSG00000171456	890.665	0.269855	0.303526	0.889068	0.373967	0.776814	ASXL1
ENSG00000143970	1400.69	0.130891	0.153692	0.851648	0.39441	0.789406	ASXL2
ENSG00000138138	2082.83	-0.367904	0.177638	-2.07108	0.038351	0.320659	ATAD1
ENSG00000156802	4714.26	-0.0747279	0.148204	-0.504222	0.614105	0.893324	ATAD2
ENSG00000119778	546.695	-0.204104	0.142658	-1.43073	0.152508	0.560115	ATAD2B
ENSG00000197785	2513.68	0.292413	0.184864	1.58177	0.113702	0.506476	ATAD3A
ENSG00000160072	1793.93	0.593193	0.170941	3.47016	0.000520139	0.0255947	ATAD3B
ENSG00000176208	479.131	0.0116774	0.209969	0.0556148	0.955649	0.991068	ATAD5
ENSG00000137343	95.7977	0.271654	0.355373	0.76442	0.444617	0.820275	ATAT1
ENSG00000107669	1035.57	0.0945032	0.156158	0.605178	0.545061	0.867327	ATE1
ENSG00000123268	681.761	0.0774822	0.155047	0.499733	0.617263	0.894678	ATF1
ENSG00000115966	681.855	0.235053	0.207438	1.13313	0.257161	0.691294	ATF2
ENSG00000162772	282.583	0.883485	0.393868	2.2431	0.0248904	0.25361	ATF3
ENSG00000128272	7555.4	-0.330666	0.115957	-2.85161	0.00434978	0.0987128	ATF4
ENSG00000169136	1723.9	0.172518	0.233884	0.737622	0.460744	0.828928	ATF5
ENSG00000118217	2646.55	-0.0103039	0.113832	-0.090519	0.927875	0.984811	ATF6
ENSG00000213676	1693.88	0.0349861	0.110646	0.316199	0.751851	0.940038	ATF6B
ENSG00000170653	1092.53	0.145931	0.13837	1.05464	0.291589	0.720913	ATF7
ENSG00000171681	1730.01	-0.0362864	0.207674	-0.174727	0.861294	0.969609	ATF7IP
ENSG00000166669	82.2124	0.253632	0.289201	0.877011	0.380481	0.780936	ATF7IP2
ENSG00000152348	223.677	-0.17401	0.191579	-0.908297	0.363721	0.769879	ATG10
ENSG00000123395	1079.6	0.235532	0.252911	0.931284	0.351707	0.761549	ATG101
ENSG00000145782	944.255	-0.0391155	0.174487	-0.224175	0.822621	0.959463	ATG12
ENSG00000175224	2115.39	0.1606	0.151802	1.05795	0.290077	0.71917	ATG13
ENSG00000126775	705.465	0.179839	0.161001	1.11701	0.26399	0.694956	ATG14
ENSG00000085978	1012.65	0.253557	0.140131	1.80943	0.0703839	0.419594	ATG16L1
ENSG00000168010	189.698	-0.470046	0.302338	-1.55471	0.120016	0.516467	ATG16L2
ENSG00000110046	1123.7	0.285753	0.162831	1.7549	0.0792764	0.442654	ATG2A
ENSG00000066739	1156.15	0.14795	0.144599	1.02317	0.306226	0.730227	ATG2B
ENSG00000144848	1971.32	-0.0672318	0.144991	-0.463698	0.642864	0.905639	ATG3
ENSG00000101844	517.185	-0.0212477	0.177239	-0.119882	0.904577	0.980162	ATG4A
ENSG00000168397	1095.65	0.239578	0.124027	1.93166	0.0534011	0.369563	ATG4B
ENSG00000125703	304.263	0.0414544	0.257891	0.160744	0.872295	0.971858	ATG4C
ENSG00000130734	307.807	-0.00399102	0.200459	-0.0199094	0.984116	0.997177	ATG4D
ENSG00000057663	1159.29	0.0337641	0.152337	0.221642	0.824593	0.959905	ATG5
ENSG00000197548	664.998	0.0725239	0.153212	0.473355	0.63596	0.902378	ATG7
ENSG00000198925	1532.01	-0.112686	0.148148	-0.760635	0.446875	0.821449	ATG9A
ENSG00000138363	2946.24	0.176893	0.129408	1.36694	0.171645	0.58954	ATIC
ENSG00000198513	89.4697	0.188298	0.311406	0.60467	0.545399	0.867327	ATL1
ENSG00000119787	1039.14	0.00469627	0.163783	0.0286737	0.977125	0.995943	ATL2
ENSG00000184743	2819.01	0.103246	0.158877	0.649851	0.515789	0.855721	ATL3
ENSG00000149311	769.348	0.205617	0.187782	1.09498	0.273528	0.702831	ATM
ENSG00000166454	2393.64	0.173976	0.09579	1.81622	0.0693367	0.41738	ATMIN
ENSG00000111676	2861.25	0.225185	0.137262	1.64055	0.100891	0.486061	ATN1
ENSG00000177556	868.909	0.356632	0.171987	2.0736	0.0381163	0.320094	ATOX1
ENSG00000145246	852.514	-0.31206	0.148083	-2.10733	0.0350893	0.307316	ATP10D
ENSG00000068650	3044.17	0.124165	0.172531	0.719664	0.471732	0.834671	ATP11A
ENSG00000058063	2400.5	-0.304923	0.149135	-2.0446	0.040894	0.330699	ATP11B
ENSG00000101974	1165.77	-0.430677	0.131049	-3.28638	0.00101484	0.0399233	ATP11C
ENSG00000105726	1060.22	0.215015	0.17597	1.22189	0.22175	0.65567	ATP13A1
ENSG00000159363	1957.19	0.266713	0.193436	1.37882	0.16795	0.583963	ATP13A2
ENSG00000133657	3780.59	0.236037	0.184034	1.28257	0.199642	0.625363	ATP13A3
ENSG00000163399	23356.1	0.034447	0.112035	0.307467	0.758488	0.942288	ATP1A1
ENSG00000203865	1760.65	-0.095724	0.126146	-0.758835	0.447951	0.822297	ATP1A1-AS1
ENSG00000143153	3658.25	-0.261532	0.139758	-1.87132	0.0613002	0.395018	ATP1B1
ENSG00000069849	5265.36	-0.515572	0.25952	-1.98664	0.0469622	0.348528	ATP1B3
ENSG00000166896	167.078	-0.0148116	0.278966	-0.0530948	0.957656	0.991068	ATP23
ENSG00000260442	18.6577	0.400372	0.564711	0.708986	0.478333	NA	ATP2A1-AS1
ENSG00000174437	7705.49	-0.0499486	0.163579	-0.305348	0.760101	0.94263	ATP2A2
ENSG00000070961	1600.83	0.163017	0.113031	1.44222	0.149239	0.556451	ATP2B1
ENSG00000058668	1680.79	0.000250029	0.249573	0.00100183	0.999201	0.999676	ATP2B4
ENSG00000017260	5192.73	-0.158776	0.0994285	-1.59688	0.110292	0.5022	ATP2C1
ENSG00000064270	1154.6	0.193859	0.162621	1.19209	0.233226	0.666689	ATP2C2
ENSG00000152234	7294.64	-0.236873	0.121538	-1.94896	0.0513001	0.362874	ATP5F1A
ENSG00000110955	13571.9	0.0158857	0.184514	0.0860945	0.931391	0.985132	ATP5F1B
ENSG00000165629	4508.59	-0.102233	0.14484	-0.705838	0.480289	0.838295	ATP5F1C
ENSG00000099624	679.296	0.2825	0.212543	1.32914	0.183801	0.605288	ATP5F1D
ENSG00000124172	9275.11	0.00946729	0.171773	0.0551151	0.956047	0.991068	ATP5F1E
ENSG00000130770	2353.54	0.086029	0.107853	0.797651	0.425073	0.809068	ATP5IF1
ENSG00000159199	917.299	0.310301	0.127616	2.43152	0.0150356	0.195251	ATP5MC1
ENSG00000135390	1397.9	0.115494	0.240075	0.481077	0.630462	0.900044	ATP5MC2
ENSG00000154518	3389.97	-0.308046	0.116782	-2.6378	0.00834459	0.143383	ATP5MC3
ENSG00000173915	1774.98	-0.0642641	0.175933	-0.365276	0.714905	0.92974	ATP5MD
ENSG00000169020	1942.99	-0.354134	0.173587	-2.04009	0.0413417	0.331844	ATP5ME
ENSG00000241468	3292.04	-0.00738095	0.157668	-0.0468131	0.962662	0.9922	ATP5MF
ENSG00000248919	131.088	-0.399099	0.305652	-1.30573	0.191645	0.616235	ATP5MF-PTCD1
ENSG00000167283	2467	-0.183856	0.150123	-1.2247	0.220688	0.654105	ATP5MG
ENSG00000156411	1339.41	-0.0670553	0.166767	-0.40209	0.687618	0.922766	ATP5MPL
ENSG00000116459	5656.36	-0.135428	0.13505	-1.0028	0.315957	0.737182	ATP5PB
ENSG00000167863	2613.13	0.104909	0.135272	0.775545	0.438018	0.816441	ATP5PD
ENSG00000154723	1710.47	0.060418	0.142736	0.423284	0.672088	0.916869	ATP5PF
ENSG00000241837	2745.92	0.0132996	0.169082	0.0786573	0.937305	0.987386	ATP5PO
ENSG00000198899	68295.8	-0.243616	0.0894225	-2.72432	0.00644331	0.123032	ATP6
ENSG00000071553	2842.05	-0.092607	0.129738	-0.713801	0.47535	0.835683	ATP6AP1
ENSG00000182220	664.14	-0.155526	0.132336	-1.17524	0.2399	0.673862	ATP6AP2
ENSG00000033627	716.246	0.0269138	0.164064	0.164045	0.869696	0.971858	ATP6V0A1
ENSG00000185344	974.275	0.165335	0.145754	1.13434	0.256651	0.690708	ATP6V0A2
ENSG00000117410	2123.12	0.349333	0.166233	2.10147	0.0355996	0.309561	ATP6V0B
ENSG00000185883	2951.25	0.14291	0.130306	1.09672	0.272764	0.701972	ATP6V0C
ENSG00000159720	2283.26	0.0692281	0.156133	0.443391	0.657483	0.911395	ATP6V0D1
ENSG00000113732	3294.66	0.183501	0.128915	1.42343	0.154611	0.562541	ATP6V0E1
ENSG00000171130	144.927	0.465431	0.247539	1.88023	0.0600762	0.391528	ATP6V0E2
ENSG00000114573	2819.74	-0.0110727	0.119945	-0.0923153	0.926448	0.984325	ATP6V1A
ENSG00000147416	3322.38	0.172394	0.128808	1.33837	0.180775	0.601865	ATP6V1B2
ENSG00000155097	2094.1	-0.0393222	0.121329	-0.324097	0.745865	0.939036	ATP6V1C1
ENSG00000100554	2262.63	-0.186236	0.224352	-0.830107	0.406478	0.798236	ATP6V1D
ENSG00000131100	2204.05	0.0889975	0.189775	0.468963	0.639096	0.903789	ATP6V1E1
ENSG00000128524	2603.09	-0.135884	0.0955992	-1.42139	0.155203	0.5631	ATP6V1F
ENSG00000136888	2579.24	-0.0787609	0.178292	-0.441751	0.658669	0.911835	ATP6V1G1
ENSG00000254870	1021.02	1.20997	0.807845	1.49778	0.134191	0.534905	ATP6V1G2-DDX39B
ENSG00000047249	900.166	-0.00240762	0.178675	-0.0134749	0.989249	0.997298	ATP6V1H
ENSG00000165240	360.005	-0.117245	0.18493	-0.633998	0.526082	0.860148	ATP7A
ENSG00000228253	44089.8	-0.0947849	0.132212	-0.716915	0.473426	0.835562	ATP8
ENSG00000124406	202.47	0.0704909	0.363011	0.194184	0.846032	0.966716	ATP8A1
ENSG00000081923	2807.98	-0.292769	0.115694	-2.53054	0.0113887	0.172388	ATP8B1
ENSG00000054793	2121.16	-0.01012	0.159738	-0.063354	0.949485	0.989914	ATP9A
ENSG00000166377	310.838	-0.0818074	0.185066	-0.442044	0.658458	0.911835	ATP9B
ENSG00000123472	640.013	0.0595995	0.208358	0.286044	0.774844	0.946789	ATPAF1
ENSG00000171953	274.371	0.0591638	0.226811	0.26085	0.794208	0.953893	ATPAF2
ENSG00000175054	2029.82	0.21003	0.144174	1.45678	0.145177	0.549182	ATR
ENSG00000138085	1606.25	-0.0191078	0.114181	-0.167347	0.867097	0.971351	ATRAID
ENSG00000164053	385.408	0.278712	0.155072	1.7973	0.072288	0.424868	ATRIP
ENSG00000088812	3408.58	-0.0586054	0.140073	-0.418393	0.67566	0.918217	ATRN
ENSG00000085224	2303.65	-0.0389813	0.174185	-0.223793	0.822919	0.959463	ATRX
ENSG00000124788	606.873	-0.282664	0.188807	-1.4971	0.134366	0.534906	ATXN1
ENSG00000130638	2318.99	-0.21843	0.124611	-1.7529	0.0796196	0.443393	ATXN10
ENSG00000224470	2655.06	0.0683823	0.132651	0.515507	0.606199	0.88941	ATXN1L
ENSG00000204842	632.517	0.167902	0.153747	1.09207	0.274803	0.703456	ATXN2
ENSG00000168488	2256.14	0.268403	0.123715	2.16952	0.030043	0.279055	ATXN2L
ENSG00000066427	460.051	-0.13943	0.233245	-0.597781	0.549986	0.869548	ATXN3
ENSG00000163635	258.558	0.459852	0.321164	1.43183	0.152193	0.560115	ATXN7
ENSG00000146776	325.882	-0.132022	0.169358	-0.779546	0.435658	0.815334	ATXN7L1
ENSG00000162650	141.721	0.336214	0.310114	1.08416	0.278292	0.706926	ATXN7L2
ENSG00000087152	1819.58	-0.00519787	0.0964246	-0.0539061	0.95701	0.991068	ATXN7L3
ENSG00000253719	1964.71	-0.223422	0.141818	-1.57541	0.115161	0.509198	ATXN7L3B
ENSG00000148090	339.234	-0.0459872	0.27321	-0.168322	0.86633	0.971351	AUH
ENSG00000127423	730.606	0.153208	0.168168	0.911046	0.362271	0.769199	AUNIP
ENSG00000115307	2345.58	0.0603525	0.132939	0.453987	0.649838	0.908243	AUP1
ENSG00000087586	2658.56	0.283978	0.287799	0.986723	0.323778	0.742827	AURKA
ENSG00000175756	1501.68	0.00521827	0.103183	0.050573	0.959666	0.991068	AURKAIP1
ENSG00000178999	771.43	0.043962	0.178109	0.246826	0.805043	0.956184	AURKB
ENSG00000158321	314.013	-0.206669	0.294586	-0.701557	0.482956	0.838295	AUTS2
ENSG00000169857	605.519	0.0706029	0.147665	0.478127	0.63256	0.900608	AVEN
ENSG00000135407	113.703	-0.0626144	0.266176	-0.235237	0.814025	0.958293	AVIL
ENSG00000105778	1298.4	0.353251	0.223101	1.58337	0.113336	0.506237	AVL9
ENSG00000119986	970.145	0.136479	0.133642	1.02123	0.307145	0.731068	AVPI1
ENSG00000103126	1105.15	0.0662022	0.179647	0.368513	0.712491	0.928936	AXIN1
ENSG00000167601	4569.45	0.353306	0.172864	2.04384	0.0409695	0.330836	AXL
ENSG00000160862	49.6201	-0.347031	0.488304	-0.710686	0.477279	0.836679	AZGP1
ENSG00000163512	580.107	-0.130144	0.26757	-0.486392	0.62669	0.898329	AZI2
ENSG00000155096	4774.92	0.060561	0.12582	0.481332	0.63028	0.900044	AZIN1
ENSG00000166710	16495.4	-1.38921	0.918316	-1.51278	0.130335	0.530464	B2M
ENSG00000169255	565.234	-0.0889533	0.157013	-0.566536	0.57103	0.877631	B3GALNT1
ENSG00000162885	917.852	-0.0753828	0.121877	-0.618516	0.536236	0.864203	B3GALNT2
ENSG00000235863	146.213	-0.366793	0.249217	-1.47178	0.14108	0.541446	B3GALT4
ENSG00000176022	758.084	0.0878256	0.153394	0.572549	0.56695	0.875703	B3GALT6
ENSG00000149541	661.45	0.528655	0.136444	3.87453	0.000106832	0.00862978	B3GAT3
ENSG00000187676	473.976	-0.139228	0.194633	-0.715336	0.474402	0.835562	B3GLCT
ENSG00000170340	814.406	-0.267621	0.1537	-1.74119	0.0816507	0.447919	B3GNT2
ENSG00000179913	2253.72	0.0538933	0.12974	0.415395	0.677853	0.919185	B3GNT3
ENSG00000176597	1558.51	-0.409952	0.341322	-1.20107	0.229724	0.663643	B3GNT5
ENSG00000156966	859.474	-0.138111	0.211872	-0.651862	0.51449	0.855236	B3GNT7
ENSG00000177191	45.3537	-0.146638	0.378399	-0.387522	0.69837	0.925044	B3GNT8
ENSG00000237172	423.986	-0.289198	0.171151	-1.68973	0.0910802	0.46932	B3GNT9
ENSG00000175711	57.3324	-0.0527893	0.365687	-0.144356	0.885219	0.975243	B3GNTL1
ENSG00000135454	85.0132	0.265802	0.280119	0.94889	0.342676	0.755679	B4GALNT1
ENSG00000139044	355.412	-0.648444	0.220186	-2.94498	0.0032298	0.0816496	B4GALNT3
ENSG00000086062	6283.82	-0.137959	0.129313	-1.06686	0.286035	0.714627	B4GALT1
ENSG00000117411	2084.16	-0.0378632	0.151317	-0.250225	0.802413	0.955712	B4GALT2
ENSG00000158850	518.925	0.0193078	0.17114	0.112819	0.910174	0.98199	B4GALT3
ENSG00000121578	810.267	-0.705224	0.20408	-3.45563	0.000549003	0.0265707	B4GALT4
ENSG00000158470	8231.87	-0.382535	0.107712	-3.55148	0.000383073	0.0209522	B4GALT5
ENSG00000118276	294.738	-0.534613	0.244712	-2.18466	0.0289137	0.274279	B4GALT6
ENSG00000027847	389.96	0.114379	0.201131	0.568679	0.569574	0.876809	B4GALT7
ENSG00000174684	189.42	-0.490897	0.213452	-2.2998	0.0214598	0.236863	B4GAT1
ENSG00000108641	201.683	-0.205847	0.257167	-0.80044	0.423456	0.808156	B9D1
ENSG00000123810	92.8261	-0.252202	0.327166	-0.770869	0.440784	0.818186	B9D2
ENSG00000247081	197.342	0.132435	0.216104	0.61283	0.539989	0.865068	BAALC-AS1
ENSG00000105393	997.151	0.0579386	0.136528	0.424372	0.671295	0.916475	BABAM1
ENSG00000158019	458.126	0.424917	0.187105	2.27101	0.0231464	0.246544	BABAM2
ENSG00000186318	429.717	-0.16055	0.179614	-0.893857	0.371398	0.77611	BACE1
ENSG00000182240	1304.71	-0.235223	0.19347	-1.21581	0.224057	0.65802	BACE2
ENSG00000156273	1550.88	0.158213	0.164595	0.961221	0.336441	0.751946	BACH1
ENSG00000002330	1066.02	-0.121981	0.148193	-0.823123	0.410438	0.800366	BAD
ENSG00000107262	1134.09	-0.284717	0.128764	-2.21115	0.0270252	0.264025	BAG1
ENSG00000112208	245.837	0.214316	0.210021	1.02045	0.307515	0.731068	BAG2
ENSG00000151929	4526.59	0.0984065	0.110064	0.894086	0.371276	0.77611	BAG3
ENSG00000156735	781.589	-0.0193578	0.172769	-0.112044	0.910789	0.982302	BAG4
ENSG00000166170	2011.13	-0.0304919	0.0993258	-0.306989	0.758852	0.942467	BAG5
ENSG00000204463	2665.74	0.200148	0.139911	1.43054	0.152563	0.560115	BAG6
ENSG00000266074	299.666	-0.301006	0.331227	-0.908758	0.363478	0.769696	BAHCC1
ENSG00000140320	696.421	0.202455	0.125158	1.6176	0.105749	0.492735	BAHD1
ENSG00000175866	1411.78	0.040138	0.163178	0.245976	0.805701	0.956184	BAIAP2
ENSG00000226137	276.841	-0.32316	0.179077	-1.80459	0.0711396	0.421029	BAIAP2-DT
ENSG00000006453	2748.05	0.0553123	0.116768	0.473694	0.635718	0.902378	BAIAP2L1
ENSG00000030110	1851.18	0.470346	0.333137	1.41187	0.157988	0.56679	BAK1
ENSG00000095739	149.282	0.291879	0.24917	1.17141	0.241435	0.674978	BAMBI
ENSG00000175334	1605.85	-0.123634	0.239373	-0.516492	0.605511	0.88941	BANF1
ENSG00000153064	150.948	-0.44303	0.259333	-1.70835	0.0875719	0.460827	BANK1
ENSG00000172530	340.189	-0.0115385	0.252404	-0.0457143	0.963538	0.992338	BANP
ENSG00000163930	1824.32	-0.0435734	0.174849	-0.249205	0.803202	0.956184	BAP1
ENSG00000138376	499.589	-0.29244	0.184611	-1.58409	0.113174	0.505963	BARD1
ENSG00000043039	566.438	-0.0845906	0.162637	-0.52012	0.60298	0.888854	BARX2
ENSG00000176788	1797.98	-0.0154997	0.116501	-0.133043	0.894159	0.975416	BASP1
ENSG00000156127	287.688	0.229917	0.160832	1.42954	0.152848	0.560365	BATF
ENSG00000168062	103.291	0.547979	0.335449	1.63357	0.102349	0.488167	BATF2
ENSG00000087088	1105.04	0.189954	0.175737	1.0809	0.279742	0.707372	BAX
ENSG00000198604	2846.52	0.110918	0.131077	0.846206	0.397438	0.791376	BAZ1A
ENSG00000009954	5917.15	0.151553	0.112827	1.34323	0.179197	0.599136	BAZ1B
ENSG00000076108	4153.04	0.11639	0.121837	0.955289	0.339431	0.754244	BAZ2A
ENSG00000123636	929.917	0.0688222	0.181171	0.379873	0.704039	0.926082	BAZ2B
ENSG00000105327	137.379	0.0268352	0.258923	0.103642	0.917454	0.98314	BBC3
ENSG00000214413	163.754	0.213586	0.245691	0.869328	0.384668	0.783559	BBIP1
ENSG00000254560	98.0854	0.053022	0.338934	0.156438	0.875688	0.97201	BBOX1-AS1
ENSG00000174483	225.405	0.358983	0.265703	1.35107	0.176673	0.595918	BBS1
ENSG00000179941	438.268	-0.0429675	0.18023	-0.238404	0.811568	0.957396	BBS10
ENSG00000125124	703.916	-0.165487	0.172845	-0.95743	0.33835	0.753175	BBS2
ENSG00000140463	285.664	-0.0295902	0.221192	-0.133776	0.89358	0.975416	BBS4
ENSG00000163093	170.708	0.227643	0.215332	1.05717	0.290435	0.719631	BBS5
ENSG00000138686	264.364	-0.0860242	0.182556	-0.471222	0.637482	0.902941	BBS7
ENSG00000122507	116.443	0.497996	0.327579	1.52023	0.128452	0.527707	BBS9
ENSG00000114439	2471	0.121016	0.658084	0.183891	0.854099	0.968298	BBX
ENSG00000187244	1249.93	-0.963056	0.284505	-3.38502	0.00071172	0.0322201	BCAM
ENSG00000075790	711.461	-0.0359607	0.311559	-0.115422	0.908111	0.981104	BCAP29
ENSG00000185825	5464.52	0.17297	0.144686	1.19548	0.231899	0.665156	BCAP31
ENSG00000050820	2898.67	0.0369057	0.17745	0.207978	0.835246	0.964374	BCAR1
ENSG00000137936	3552.49	0.460293	0.21748	2.11648	0.0343036	0.304592	BCAR3
ENSG00000064787	125.964	-0.10978	0.227505	-0.482541	0.629422	0.899684	BCAS1
ENSG00000116752	1621.97	0.191679	0.16432	1.16649	0.243414	0.675517	BCAS2
ENSG00000141376	165.294	-0.0750062	0.222812	-0.336634	0.736393	0.937083	BCAS3
ENSG00000124243	1445.08	-0.269102	0.170878	-1.57482	0.115298	0.509289	BCAS4
ENSG00000105552	996.073	0.253301	0.169998	1.49002	0.136219	0.536689	BCAT2
ENSG00000107949	2657.08	0.152548	0.17323	0.880608	0.37853	0.77947	BCCIP
ENSG00000186666	108.938	0.251582	0.264033	0.952845	0.340669	0.755056	BCDIN3D
ENSG00000114200	134.319	-0.304509	0.245168	-1.24205	0.21422	0.644688	BCHE
ENSG00000248098	651.348	-0.283298	0.149739	-1.89195	0.0584973	0.385688	BCKDHA
ENSG00000083123	278.37	-0.284144	0.179816	-1.58019	0.114062	0.506944	BCKDHB
ENSG00000103507	693.907	0.104703	0.177701	0.589211	0.55572	0.871488	BCKDK
ENSG00000142867	1260.18	0.129697	0.157081	0.825669	0.408992	0.799668	BCL10
ENSG00000140379	55.9279	1.91846	0.968583	1.98068	0.0476269	0.350367	BCL2A1
ENSG00000171552	3591.27	0.224482	0.234543	0.957101	0.338516	0.753265	BCL2L1
ENSG00000137875	44.3905	-0.0196128	0.385874	-0.0508268	0.959464	0.991068	BCL2L10
ENSG00000153094	296.62	0.180225	0.486875	0.370166	0.711258	0.928428	BCL2L11
ENSG00000126453	850.959	0.339161	0.165335	2.05136	0.0402319	0.328669	BCL2L12
ENSG00000099968	1288.04	0.15106	0.126115	1.19779	0.230997	0.664563	BCL2L13
ENSG00000121380	60.2683	-0.132727	0.323951	-0.409712	0.682018	0.92047	BCL2L14
ENSG00000129473	599.986	0.111051	1.58623	0.0700095	NA	NA	BCL2L2
ENSG00000258643	136.513	-0.689762	1.41123	-0.488766	0.625007	0.898021	BCL2L2-PABPN1
ENSG00000069399	766.847	0.10416	0.18551	0.561478	0.574472	0.879522	BCL3
ENSG00000113916	379.458	-0.615487	0.194888	-3.15815	0.00158772	0.052025	BCL6
ENSG00000110987	548.811	-0.128822	0.157056	-0.820232	0.412084	0.801136	BCL7A
ENSG00000106635	1245.56	0.322343	0.125661	2.56518	0.0103122	0.162445	BCL7B
ENSG00000099385	998.989	-0.00829248	0.113233	-0.0732337	0.94162	0.988045	BCL7C
ENSG00000116128	288.373	0.11021	0.17529	0.628731	0.529525	0.86207	BCL9
ENSG00000186174	4987.1	0.00542644	0.126157	0.0430133	0.965691	0.992679	BCL9L
ENSG00000029363	3390.94	-0.195627	0.166149	-1.17742	0.239027	0.672779	BCLAF1
ENSG00000173681	173.686	0.0412945	0.228931	0.18038	0.856854	0.968512	BCLAF3
ENSG00000197580	53.8754	-0.382054	0.425905	-0.897039	0.369698	0.775502	BCO2
ENSG00000183337	826.806	0.438407	0.212304	2.065	0.0389232	0.323547	BCOR
ENSG00000085185	318.355	-0.0785166	0.199514	-0.39354	0.693921	0.92423	BCORL1
ENSG00000186716	3903.68	0.178211	0.159335	1.11847	0.263365	0.694549	BCR
ENSG00000169668	68.0624	-0.122218	0.298575	-0.409338	0.682292	0.920546	BCRP2
ENSG00000074582	455.14	0.507544	0.189199	2.68259	0.00730556	0.131653	BCS1L
ENSG00000236824	112.548	0.800725	0.387809	2.06474	0.0389474	0.323564	BCYRN1
ENSG00000161267	438.573	-0.0860818	0.309887	-0.277785	0.781178	0.949952	BDH1
ENSG00000164039	396.817	0.130423	0.220258	0.592135	0.55376	0.871173	BDH2
ENSG00000168398	286.753	-0.0990206	0.30442	-0.325277	0.744972	0.938904	BDKRB2
ENSG00000176697	303.631	-0.145014	0.274911	-0.527496	0.597849	0.88718	BDNF
ENSG00000145734	1714.65	0.0620629	0.143233	0.433299	0.664798	0.914021	BDP1
ENSG00000126581	1387.74	0.0432478	0.129627	0.333633	0.738656	0.937251	BECN1
ENSG00000178409	213.689	0.16972	0.202045	0.840011	0.400902	0.794836	BEND3
ENSG00000151917	96.6744	-0.43409	0.27937	-1.55382	0.120228	0.517169	BEND6
ENSG00000167995	493.428	0.962111	0.356177	2.70122	0.00690864	0.12789	BEST1
ENSG00000105829	547.477	0.573047	0.267337	2.14354	0.0320701	0.291984	BET1
ENSG00000177951	1256.71	0.0975407	0.14163	0.688702	0.491011	0.842801	BET1L
ENSG00000166681	3081.12	-0.376188	0.147266	-2.55449	0.0106345	0.165222	BEX3
ENSG00000184515	116.691	0.390894	0.249058	1.56949	0.116535	0.510487	BEX5
ENSG00000103429	1199.87	-0.100276	0.188332	-0.532443	0.59442	0.886028	BFAR
ENSG00000198908	122.28	0.605559	1.80637	0.335235	0.737448	0.937251	BHLHB9
ENSG00000134107	4411.17	-0.335085	0.130378	-2.5701	0.0101669	0.161152	BHLHE40
ENSG00000123095	541.555	0.151641	0.233749	0.648735	0.51651	0.855886	BHLHE41
ENSG00000151746	179.731	-0.329956	0.198817	-1.65959	0.0969964	0.479862	BICD1
ENSG00000185963	2533.68	-0.0470108	0.14405	-0.326351	0.744159	0.938904	BICD2
ENSG00000135127	484.001	0.0744874	0.186881	0.398582	0.690201	0.923804	BICDL1
ENSG00000162069	351.363	-0.229541	0.177668	-1.29196	0.196369	0.621597	BICDL2
ENSG00000063169	294.862	0.352516	0.240211	1.46752	0.142234	0.544404	BICRA
ENSG00000112624	369.833	-0.0160422	0.165872	-0.0967144	0.922953	0.983554	BICRAL
ENSG00000015475	1302.31	-0.0983089	0.147801	-0.665144	0.505958	0.851378	BID
ENSG00000100290	508.213	0.805011	0.17291	4.65566	3.23e-06	0.000633535	BIK
ENSG00000136717	357.441	-0.122716	0.170246	-0.720813	0.471025	0.834671	BIN1
ENSG00000147439	973.029	-0.294219	0.167783	-1.75357	0.0795046	0.443256	BIN3
ENSG00000110330	1552.79	-0.608447	0.248864	-2.44489	0.0144895	0.19154	BIRC2
ENSG00000023445	973.487	0.287892	0.197794	1.45551	0.145527	0.549711	BIRC3
ENSG00000089685	715.588	-0.677469	0.138432	-4.89388	9.89e-07	0.000246542	BIRC5
ENSG00000115760	3967.54	0.146515	0.13054	1.12238	0.261701	0.693645	BIRC6
ENSG00000282851	137.913	-0.194213	0.328788	-0.590692	0.554727	0.871191	BISPR
ENSG00000134897	330.295	-0.412173	0.3106	-1.32702	0.184501	0.60593	BIVM
ENSG00000166619	8035.66	-0.0786312	0.154222	-0.509857	0.610152	0.89183	BLCAP
ENSG00000197299	1137.92	0.0216707	0.151031	0.143485	0.885907	0.975399	BLM
ENSG00000108578	891.904	-0.167421	0.142319	-1.17638	0.239442	0.67334	BLMH
ENSG00000135441	706.697	0.0959581	0.156931	0.611466	0.540891	0.865356	BLOC1S1
ENSG00000196072	485.096	0.824887	0.413225	1.99622	0.0459101	0.344982	BLOC1S2
ENSG00000189114	389.041	0.205188	0.23592	0.869736	0.384445	0.783559	BLOC1S3
ENSG00000186222	264.402	-0.206457	0.202633	-1.01887	0.308263	0.731068	BLOC1S4
ENSG00000188428	361.582	-0.048856	0.201052	-0.243001	0.808004	0.956717	BLOC1S5
ENSG00000259040	3521.43	0.668042	3.72501	0.179339	0.857671	0.968602	BLOC1S5-TXNDC5
ENSG00000104164	1072.1	0.00441204	0.296928	0.014859	0.988145	0.997189	BLOC1S6
ENSG00000106605	414.375	-0.481794	0.176861	-2.72414	0.00644687	0.123032	BLVRA
ENSG00000090013	930.227	-0.363317	0.295435	-1.22977	0.218783	0.650994	BLVRB
ENSG00000117475	1062.56	0.133033	0.142703	0.932238	0.351214	0.761256	BLZF1
ENSG00000104081	187.573	-0.274161	0.489093	-0.56055	0.575104	0.879847	BMF
ENSG00000168283	1394.41	-0.223271	0.215564	-1.03575	0.300319	0.726711	BMI1
ENSG00000168487	3359.43	-0.294301	0.132503	-2.2211	0.0263444	0.261196	BMP1
ENSG00000125845	611.938	0.287536	0.187657	1.53224	0.125463	0.523234	BMP2
ENSG00000138756	494.78	0.643261	0.338399	1.90089	0.0573158	0.381405	BMP2K
ENSG00000125378	200.032	-0.153	0.286084	-0.534809	0.592782	0.884967	BMP4
ENSG00000107779	517.839	-0.386976	0.161153	-2.4013	0.0163372	0.204918	BMPR1A
ENSG00000138696	259.179	-0.0488068	0.229748	-0.212436	0.831767	0.962771	BMPR1B
ENSG00000204217	1450.13	-0.138697	0.155136	-0.89403	0.371306	0.77611	BMPR2
ENSG00000165733	2846.89	0.26573	0.133628	1.98859	0.0467468	0.348207	BMS1
ENSG00000251079	59.2283	0.644002	0.558335	1.15343	0.248732	0.681798	BMS1P2
ENSG00000164603	317.608	-0.248454	0.223572	-1.11129	0.266442	0.696367	BMT2
ENSG00000113734	140.538	0.0778228	0.242067	0.321493	0.747837	0.9392	BNIP1
ENSG00000140299	2232.92	-0.0699785	0.168353	-0.415664	0.677656	0.919185	BNIP2
ENSG00000104765	2195.91	-0.391755	0.210591	-1.86027	0.0628478	0.39874	BNIP3L
ENSG00000145919	972.513	0.191079	0.213967	0.893033	0.37184	0.776121	BOD1
ENSG00000038219	1719.68	0.0553499	0.129087	0.428781	0.668083	0.915906	BOD1L1
ENSG00000176720	648.126	-0.142392	0.191461	-0.743713	0.45705	0.826716	BOK
ENSG00000178096	69.9735	0.00672135	0.33681	0.0199559	0.984079	0.997177	BOLA1
ENSG00000183336	494.706	-0.174028	0.171532	-1.01455	0.310319	0.732625	BOLA2
ENSG00000169627	746.988	-0.0826004	0.147558	-0.559781	0.575629	0.880011	BOLA2B
ENSG00000261740	574.175	-0.0526215	0.14497	-0.362982	0.716619	0.930258	BOLA2-SMG1P6
ENSG00000163170	432.521	0.537238	0.17172	3.12857	0.00175657	0.0556014	BOLA3
ENSG00000261236	2310.07	0.37398	0.19093	1.95873	0.0501439	0.359692	BOP1
ENSG00000136122	884.196	0.389978	0.175804	2.21825	0.0265376	0.261878	BORA
ENSG00000165714	125.986	0.667889	0.364796	1.83085	0.0671224	0.41124	BORCS5
ENSG00000196544	185.402	0.0689858	0.187671	0.367589	0.71318	0.929079	BORCS6
ENSG00000166275	310.068	-0.2531	0.217958	-1.16123	0.245547	0.67763	BORCS7
ENSG00000254901	233.716	0.0105173	0.19844	0.0529999	0.957732	0.991068	BORCS8
ENSG00000064489	54.6649	0.167336	0.461104	0.362903	0.716678	0.930258	BORCS8-MEF2B
ENSG00000172331	396.69	0.162496	0.201592	0.806068	0.420204	0.805686	BPGM
ENSG00000137274	134.334	-0.248481	0.320583	-0.775089	0.438287	0.816447	BPHL
ENSG00000162813	502.551	-0.231803	0.283423	-0.817872	0.41343	0.801427	BPNT1
ENSG00000171634	1661.07	-0.0532283	0.111343	-0.478057	0.63261	0.900608	BPTF
ENSG00000157764	1120.95	0.0834985	0.207569	0.402269	0.687486	0.922766	BRAF
ENSG00000089234	738.652	0.130978	0.137736	0.950933	0.341638	0.755679	BRAP
ENSG00000106009	1311.72	0.0271721	0.112869	0.240741	0.809756	0.95702	BRAT1
ENSG00000012048	1096.5	0.0510098	0.133741	0.381406	0.702902	0.926082	BRCA1
ENSG00000139618	892.001	0.192117	0.183811	1.04519	0.295934	0.724425	BRCA2
ENSG00000185515	745.073	-0.0679317	0.38168	-0.177981	0.858738	0.96917	BRCC3
ENSG00000100425	869.095	-0.10698	0.140304	-0.76249	0.445767	0.821066	BRD1
ENSG00000204256	3786.61	-0.00217105	0.129658	-0.0167445	0.98664	0.997177	BRD2
ENSG00000169925	1086.42	0.0963674	0.197115	0.488889	0.624921	0.898021	BRD3
ENSG00000235106	313.232	0.434788	0.333605	1.3033	0.192471	0.617507	BRD3OS
ENSG00000141867	1281.06	0.416355	0.165599	2.51424	0.011929	0.174187	BRD4
ENSG00000166164	2659.73	0.0629524	0.162292	0.387897	0.698092	0.925044	BRD7
ENSG00000112983	1358.09	0.0151653	0.109618	0.138347	0.889967	0.975416	BRD8
ENSG00000028310	2098.73	0.326246	0.14713	2.2174	0.0265957	0.261916	BRD9
ENSG00000185024	558.495	0.140141	0.154036	0.909799	0.362929	0.769223	BRF1
ENSG00000104221	400.113	0.0822357	0.189482	0.434002	0.664287	0.913767	BRF2
ENSG00000164713	1669.24	0.231368	0.113496	2.03855	0.0414951	0.332026	BRI3
ENSG00000184992	807.881	0.0511444	0.245126	0.208645	0.834725	0.964374	BRI3BP
ENSG00000182685	56.2817	-0.194616	0.361053	-0.539023	0.589871	0.883785	BRICD5
ENSG00000136492	592.938	-0.0451216	0.167702	-0.269058	0.787885	0.951424	BRIP1
ENSG00000113460	2206.23	0.354541	0.193541	1.83187	0.0669713	0.41124	BRIX1
ENSG00000254999	2539.26	0.121909	0.114211	1.0674	0.285791	0.714627	BRK1
ENSG00000174744	1137.83	0.489773	0.281962	1.73702	0.0823845	0.449579	BRMS1
ENSG00000100916	412.318	-0.038097	0.292604	-0.1302	0.896408	0.97636	BRMS1L
ENSG00000162819	992.476	0.0191018	0.200693	0.0951792	0.924172	0.983674	BROX
ENSG00000156983	581.688	0.167482	0.200418	0.835664	0.403344	0.797059	BRPF1
ENSG00000096070	1335.75	0.252647	0.171667	1.47173	0.141093	0.541446	BRPF3
ENSG00000185658	1089.7	-0.150876	0.255152	-0.59132	0.554306	0.871191	BRWD1
ENSG00000165288	1222.6	-0.16085	0.162852	-0.987705	0.323297	0.742223	BRWD3
ENSG00000168000	1320.75	0.108841	0.13949	0.780279	0.435227	0.815334	BSCL2
ENSG00000160058	1545.98	-0.000870976	0.138418	-0.00629236	0.994979	0.998305	BSDC1
ENSG00000172270	12080.1	0.0333677	0.120722	0.276401	0.78224	0.950303	BSG
ENSG00000130303	6373.48	-0.369211	0.179036	-2.06222	0.0391873	0.324824	BST2
ENSG00000095564	2330.06	-0.144927	0.126165	-1.14871	0.250675	0.684111	BTAF1
ENSG00000064726	3929.89	-0.184511	0.133971	-1.37725	0.168435	0.584674	BTBD1
ENSG00000148925	1275.91	-0.0884698	0.120056	-0.736904	0.461181	0.829201	BTBD10
ENSG00000151136	460.029	-0.0630745	0.156487	-0.403064	0.686901	0.922451	BTBD11
ENSG00000222009	112.117	-0.277421	0.682895	-0.406243	0.684564	0.921318	BTBD19
ENSG00000133243	1688	-0.0442467	0.140409	-0.315127	0.752665	0.94006	BTBD2
ENSG00000132640	892.624	1.64448	0.291002	5.65109	1.59e-08	8.09e-06	BTBD3
ENSG00000011114	1244.16	3.38e-05	0.165085	0.000204699	0.999837	0.999905	BTBD7
ENSG00000183826	527.893	-0.0870881	0.216493	-0.402267	0.687487	0.922766	BTBD9
ENSG00000174808	296.571	-0.360588	0.207022	-1.74178	0.0815462	0.447683	BTC
ENSG00000169814	292.385	-0.194875	0.177531	-1.09769	0.27234	0.701739	BTD
ENSG00000145741	8321.56	-0.00450356	0.155284	-0.029002	0.976863	0.995943	BTF3
ENSG00000134717	1078.37	-0.199357	0.255641	-0.779834	0.435489	0.815334	BTF3L4
ENSG00000133639	1548.99	-0.0229575	0.132933	-0.1727	0.862887	0.970203	BTG1
ENSG00000159388	804.379	-0.143134	0.204581	-0.699642	0.484151	0.838786	BTG2
ENSG00000154640	502.368	-0.125385	0.19316	-0.649126	0.516257	0.855777	BTG3
ENSG00000112763	718.214	0.0274185	0.148147	0.185076	0.85317	0.968298	BTN2A1
ENSG00000124508	171.12	0.51665	0.344976	1.49764	0.134226	0.534905	BTN2A2
ENSG00000124549	127.63	-0.204099	0.257899	-0.79139	0.428717	0.812009	BTN2A3P
ENSG00000026950	181.663	-0.163218	0.353601	-0.461587	0.644378	0.905966	BTN3A1
ENSG00000186470	239.106	0.141119	0.519064	0.271873	0.78572	0.950303	BTN3A2
ENSG00000111801	157.123	-0.46376	0.490043	-0.946367	0.343961	0.755946	BTN3A3
ENSG00000166167	800.247	-0.0921447	0.118734	-0.776062	0.437712	0.816441	BTRC
ENSG00000169679	2473.99	0.134629	0.116523	1.15538	0.247933	0.68106	BUB1
ENSG00000156970	1966.4	-0.192432	0.172157	-1.11777	0.263665	0.694831	BUB1B
ENSG00000154473	5662.32	-0.133604	0.10783	-1.23902	0.215338	0.646057	BUB3
ENSG00000137656	971.734	0.056989	0.147003	0.387673	0.698258	0.925044	BUD13
ENSG00000071462	1736.8	0.331604	0.140577	2.35888	0.0183301	0.215571	BUD23
ENSG00000106245	1668.92	0.247829	0.156738	1.58116	0.113841	0.506636	BUD31
ENSG00000112578	510.896	0.237808	0.191846	1.23958	0.215131	0.645568	BYSL
ENSG00000082153	4937.2	0.397348	0.192278	2.06653	0.0387784	0.323256	BZW1
ENSG00000136261	2818.84	0.0709509	0.114369	0.620366	0.535017	0.864203	BZW2
ENSG00000165511	123.768	0.190557	0.254097	0.749937	0.453293	0.825149	C10orf25
ENSG00000119965	329.897	-0.0682238	0.191641	-0.355999	0.721841	0.932737	C10orf88
ENSG00000137720	324.815	0.0837098	0.193272	0.433119	0.664928	0.914021	C11orf1
ENSG00000171067	843.633	0.21731	0.209205	1.03874	0.298925	0.725676	C11orf24
ENSG00000149179	371.993	-0.296298	0.172871	-1.71398	0.0865319	0.460117	C11orf49
ENSG00000149300	66.7408	-0.00986857	0.33517	-0.0294435	0.976511	0.995869	C11orf52
ENSG00000182919	105.805	-0.05851	0.298126	-0.196259	0.844407	0.966053	C11orf54
ENSG00000110696	3003.77	-0.102567	0.149827	-0.684575	0.493612	0.843809	C11orf58
ENSG00000175573	602.511	0.36777	0.22314	1.64816	0.0993201	0.483248	C11orf68
ENSG00000180425	78.2801	-0.881023	0.438017	-2.01139	0.0442842	0.338821	C11orf71
ENSG00000166352	58.8647	0.0598063	0.358122	0.167	0.86737	0.971351	C11orf74
ENSG00000173715	224.896	-0.122408	0.227489	-0.538084	0.590519	0.884126	C11orf80
ENSG00000188070	608.068	0.0299061	0.131254	0.22785	0.819763	0.958971	C11orf95
ENSG00000187479	45.5765	0.0158016	0.487824	0.0323921	0.974159	0.995161	C11orf96
ENSG00000278615	405.814	0.384606	0.393535	0.977312	0.328415	0.746942	C11orf98
ENSG00000139637	548.217	0.271549	0.166785	1.62814	0.103496	0.489624	C12orf10
ENSG00000133641	771.322	0.260147	0.226827	1.1469	0.251423	0.68424	C12orf29
ENSG00000047621	684.952	0.228136	0.134428	1.69709	0.08968	0.466406	C12orf4
ENSG00000157895	410.306	0.188574	0.193687	0.973606	0.330252	0.748488	C12orf43
ENSG00000111412	1277.61	0.107469	0.133266	0.806423	0.419999	0.805686	C12orf49
ENSG00000177627	90.8102	0.309633	0.32384	0.956129	0.339007	0.754069	C12orf54
ENSG00000111678	569.43	0.0167979	0.278126	0.0603966	0.95184	0.990617	C12orf57
ENSG00000130921	376.338	-0.0383773	0.224343	-0.171065	0.864173	0.970654	C12orf65
ENSG00000174206	235.501	-0.15966	0.202583	-0.788119	0.430627	0.812806	C12orf66
ENSG00000204954	109.494	-0.0593919	0.289916	-0.204859	0.837682	0.964659	C12orf73
ENSG00000235162	399.964	0.147883	0.337608	0.438031	0.661364	0.912904	C12orf75
ENSG00000174456	120.083	-0.130338	0.287739	-0.452973	0.650568	0.9084	C12orf76
ENSG00000179933	2167.99	0.199379	0.123305	1.61695	0.105888	0.492735	C14orf119
ENSG00000100802	157.283	-0.127726	0.216085	-0.591089	0.554461	0.871191	C14orf93
ENSG00000250021	114.142	5.98213	2.05753	2.90743	NA	NA	C15orf38-AP3S2
ENSG00000167173	1335.39	0.590528	0.159548	3.70125	0.000214538	0.0139053	C15orf39
ENSG00000169609	353.637	0.17347	0.165918	1.04552	0.295783	0.724343	C15orf40
ENSG00000186073	395.606	0.383759	0.193281	1.98549	0.0470897	0.348658	C15orf41
ENSG00000166920	3279.33	0.0652129	0.344901	0.189077	0.850032	0.967979	C15orf48
ENSG00000189227	153.224	-0.0878973	0.209183	-0.420192	0.674345	0.917866	C15orf61
ENSG00000166780	54.2836	0.59719	0.342065	1.74584	0.0808391	0.446101	C16orf45
ENSG00000185905	780.448	0.18365	0.176056	1.04313	0.296886	0.724973	C16orf54
ENSG00000140688	1467.45	0.0569441	0.237303	0.239964	0.810358	0.95727	C16orf58
ENSG00000125149	812.722	-0.081677	0.138797	-0.588464	0.556221	0.871825	C16orf70
ENSG00000182831	2704.26	0.0418679	0.102744	0.407496	0.683644	0.921104	C16orf72
ENSG00000154102	499.775	0.160376	0.159909	1.00292	0.315898	0.737182	C16orf74
ENSG00000155330	318.546	-0.242119	0.163988	-1.47644	0.139826	0.540326	C16orf87
ENSG00000174109	351.134	0.0823691	0.193869	0.424869	0.670932	0.916475	C16orf91
ENSG00000260456	47.1138	-0.104478	0.447584	-0.233427	0.81543	0.958386	C16orf95
ENSG00000256806	63.3756	-0.340704	0.370393	-0.919846	0.357653	0.766407	C17orf100
ENSG00000258315	99.4065	0.934117	0.399316	2.33929	0.0193204	0.223651	C17orf49
ENSG00000212719	235.666	-0.115555	0.320354	-0.360711	0.718315	0.930967	C17orf51
ENSG00000125319	270.069	0.222677	0.213999	1.04055	0.298082	0.725155	C17orf53
ENSG00000186665	153.998	0.337642	0.260931	1.29399	0.19567	0.621265	C17orf58
ENSG00000214226	55.6275	0.120321	0.41465	0.290175	0.771682	0.945976	C17orf67
ENSG00000108666	278.297	-0.0206651	0.199348	-0.103664	0.917436	0.98314	C17orf75
ENSG00000141219	441.821	0.352207	0.351619	1.00167	0.316503	0.737755	C17orf80
ENSG00000141428	224.669	-0.117876	0.201192	-0.585891	0.557949	0.872658	C18orf21
ENSG00000152242	978.888	0.115234	0.13534	0.85144	0.394525	0.789406	C18orf25
ENSG00000177576	226.371	0.262227	0.293229	0.894274	0.371175	0.77611	C18orf32
ENSG00000166845	252.498	-0.0938876	0.326884	-0.28722	0.773944	0.946632	C18orf54
ENSG00000131943	367.677	-0.010527	0.155858	-0.0675425	0.94615	0.989115	C19orf12
ENSG00000228300	641.045	0.248035	0.197808	1.25392	0.209871	0.639319	C19orf24
ENSG00000119559	308.541	-0.226485	0.305406	-0.741587	0.458337	0.827629	C19orf25
ENSG00000167644	3531.59	0.00126917	0.145428	0.00872718	0.993037	0.997928	C19orf33
ENSG00000160392	270.287	-0.0110246	0.31954	-0.0345014	0.972477	0.995161	C19orf47
ENSG00000167747	1320.42	0.0332137	0.222316	0.149399	0.881239	0.97452	C19orf48
ENSG00000104979	975.233	0.00693765	0.227965	0.030433	0.975722	0.995585	C19orf53
ENSG00000188493	255.958	0.159107	0.218273	0.728937	0.46604	0.832039	C19orf54
ENSG00000132016	188.691	-0.291132	0.256416	-1.13539	0.256212	0.690536	C19orf57
ENSG00000130813	449.566	-0.260713	0.153912	-1.69391	0.0902833	0.467231	C19orf66
ENSG00000174917	420.96	-0.102455	0.146108	-0.701228	0.483161	0.838295	C19orf70
ENSG00000183397	44.9902	0.306562	0.375908	0.815524	0.414772	0.802228	C19orf71
ENSG00000197223	298.525	-0.262039	0.233061	-1.12434	0.26087	0.693102	C1D
ENSG00000106392	994.71	-0.220674	0.21749	-1.01464	0.310278	0.732625	C1GALT1
ENSG00000171155	536.311	0.00834456	1.35646	0.00615173	NA	NA	C1GALT1C1
ENSG00000116922	514.866	0.186178	0.175755	1.0593	0.289463	0.718796	C1orf109
ENSG00000000460	846.343	0.347606	0.14497	2.39777	0.016495	0.206282	C1orf112
ENSG00000162817	223.813	-0.110688	0.178018	-0.621781	0.534086	0.864203	C1orf115
ENSG00000182795	4129.56	-0.11249	0.107105	-1.05028	0.293589	0.722337	C1orf116
ENSG00000197982	1266.79	0.354953	0.17964	1.97592	0.048164	0.351681	C1orf122
ENSG00000162384	466.009	-0.118795	0.167936	-0.707383	0.479328	0.837858	C1orf123
ENSG00000143633	338.321	-0.0471429	0.197167	-0.239101	0.811027	0.957293	C1orf131
ENSG00000131591	305.39	-0.391892	0.246515	-1.58973	0.111896	0.50499	C1orf159
ENSG00000198912	910.339	0.120106	0.125227	0.959108	0.337504	0.752541	C1orf174
ENSG00000119280	448.593	-0.0183775	0.15089	-0.121794	0.903062	0.979787	C1orf198
ENSG00000253313	134.028	0.354286	0.28378	1.24845	0.211866	0.641987	C1orf210
ENSG00000142686	241.395	0.122941	0.195168	0.629924	0.528744	0.861942	C1orf216
ENSG00000239887	176.781	0.111277	0.195045	0.570521	0.568324	0.876035	C1orf226
ENSG00000143793	435.537	-0.131141	0.166044	-0.789801	0.429644	0.812531	C1orf35
ENSG00000143612	2495.17	0.164508	0.120804	1.36178	0.173268	0.591497	C1orf43
ENSG00000164008	260.917	0.134881	0.211203	0.638633	0.523062	0.859463	C1orf50
ENSG00000162642	929.318	-0.0367319	0.124518	-0.294991	0.768001	0.945063	C1orf52
ENSG00000203724	56.5424	-0.353568	0.499373	-0.708023	0.478931	0.837858	C1orf53
ENSG00000118292	51.3358	-0.20894	0.367609	-0.568376	0.56978	0.876809	C1orf54
ENSG00000143443	72.0959	0.0942578	0.322512	0.292261	0.770087	0.945976	C1orf56
ENSG00000162757	384.135	-0.293328	0.180948	-1.62106	0.105005	0.492019	C1orf74
ENSG00000108561	3263.07	0.0546238	0.180463	0.302687	0.762128	0.943078	C1QBP
ENSG00000133466	1328.46	0.250784	0.248805	1.00795	0.313477	0.735478	C1QTNF6
ENSG00000159403	873.302	-0.826114	0.228535	-3.61483	0.000300541	0.017617	C1R
ENSG00000139178	466.91	-0.30477	0.208542	-1.46143	0.143896	0.547632	C1RL
ENSG00000205885	347.91	-0.17724	0.190024	-0.932722	0.350963	0.76101	C1RL-AS1
ENSG00000182326	534.98	-0.733815	0.222852	-3.29283	0.000991848	0.0392287	C1S
ENSG00000088854	937.189	0.0574641	0.140596	0.408717	0.682748	0.920825	C20orf194
ENSG00000176659	380.885	-0.0677381	0.170439	-0.397434	0.691047	0.924079	C20orf197
ENSG00000101220	1313.49	0.296369	0.141101	2.10041	0.0356932	0.30966	C20orf27
ENSG00000196476	108.873	-0.187541	0.267321	-0.70156	0.482954	0.838295	C20orf96
ENSG00000160298	104.277	-0.16705	0.328734	-0.50816	0.611341	0.892059	C21orf58
ENSG00000154642	458.14	-0.376898	0.16767	-2.24785	0.0245856	0.251909	C21orf91
ENSG00000242259	321.737	-0.963072	0.186721	-5.15782	2.5e-07	7.66e-05	C22orf39
ENSG00000184208	317.356	-0.0411846	0.485494	-0.0848302	0.932396	0.985386	C22orf46
ENSG00000172375	219.706	0.341678	0.249175	1.37123	0.170302	0.587697	C2CD2L
ENSG00000168014	1189.43	0.0404004	0.163067	0.247754	0.804325	0.956184	C2CD3
ENSG00000111731	939.288	-0.0521151	0.141739	-0.367683	0.71311	0.92907	C2CD5
ENSG00000273045	66.2003	0.00521281	0.37812	0.0137861	0.989001	0.997298	C2orf15
ENSG00000115998	173.707	0.104327	0.231952	0.44978	0.652869	0.9098	C2orf42
ENSG00000135974	634.522	-0.169812	0.157073	-1.0811	0.279651	0.707324	C2orf49
ENSG00000168887	452.393	-0.107981	0.200985	-0.537259	0.591089	0.884373	C2orf68
ENSG00000178074	380.539	-0.15055	0.211971	-0.710239	0.477556	0.836829	C2orf69
ENSG00000237651	167.274	0.118123	0.281149	0.420145	0.674379	0.917866	C2orf74
ENSG00000186132	72.3052	-0.127127	0.320503	-0.396647	0.691628	0.924079	C2orf76
ENSG00000125730	5103.49	0.317376	0.218199	1.45453	0.145801	0.550183	C3
ENSG00000114405	169.82	0.174853	0.227596	0.76826	0.442333	0.819165	C3orf14
ENSG00000179021	519.152	0.066498	0.197109	0.337366	0.735841	0.936925	C3orf38
ENSG00000114529	513.49	-0.0109497	0.301288	-0.0363429	0.971009	0.995014	C3orf52
ENSG00000188315	108.628	0.261097	0.264993	0.985298	0.324478	0.743379	C3orf62
ENSG00000163689	161.788	0.415847	0.261737	1.5888	0.112106	0.505026	C3orf67
ENSG00000123843	101.603	0.778409	0.331733	2.34649	0.018951	0.220816	C4BPB
ENSG00000154274	404.028	-0.309337	0.151885	-2.03666	0.0416846	0.332055	C4orf19
ENSG00000164096	911.979	-0.068327	0.154666	-0.441772	0.658654	0.911835	C4orf3
ENSG00000151470	380.871	-0.311391	0.213314	-1.45978	0.144351	0.548228	C4orf33
ENSG00000163633	48.6532	-0.255459	0.515765	-0.495301	0.620387	0.895991	C4orf36
ENSG00000205208	174.663	-0.218104	0.198381	-1.09942	0.271585	0.700895	C4orf46
ENSG00000243449	298.99	0.185195	0.185605	0.997794	0.318379	0.73955	C4orf48
ENSG00000197405	34.502	-0.788957	0.560761	-1.40694	0.159445	0.569812	C5AR1
ENSG00000113583	1768.15	-0.563998	0.126113	-4.47217	7.74e-06	0.00125338	C5orf15
ENSG00000082213	1242.92	0.0155136	0.112567	0.137816	0.890386	0.975416	C5orf22
ENSG00000181904	118.46	0.308103	0.348481	0.884129	0.376627	0.778098	C5orf24
ENSG00000181751	621.491	-0.240974	0.206626	-1.16623	0.243522	0.675517	C5orf30
ENSG00000172244	474.017	0.106339	0.212332	0.500814	0.616502	0.894678	C5orf34
ENSG00000205765	967.602	0.114376	0.301484	0.379375	0.704409	0.926082	C5orf51
ENSG00000197536	139.304	-0.0998829	0.257626	-0.387706	0.698234	0.925044	C5orf56
ENSG00000164241	101.896	-0.31223	0.308301	-1.01275	0.311181	0.733367	C5orf63
ENSG00000224186	68.2281	-0.273957	0.329267	-0.832021	0.405397	0.797631	C5orf66
ENSG00000196821	4256.46	-0.106275	0.121466	-0.874932	0.381611	0.781779	C6orf106
ENSG00000185127	912.585	-0.179021	0.137328	-1.3036	0.192371	0.617507	C6orf120
ENSG00000188112	1033.66	-0.0528041	0.147426	-0.358173	0.720214	0.931643	C6orf132
ENSG00000204564	216.592	-0.443575	0.260309	-1.70403	0.0883751	0.462398	C6orf136
ENSG00000197261	464.066	0.0804725	0.264334	0.304434	0.760797	0.943078	C6orf141
ENSG00000130349	213.331	0.0286559	0.236513	0.12116	0.903564	0.97984	C6orf203
ENSG00000181577	166.799	-0.758268	0.314324	-2.41238	0.0158489	0.201311	C6orf223
ENSG00000221821	27.4037	0.542832	0.542509	1.00059	0.317023	0.737995	C6orf226
ENSG00000204439	597.713	-0.0784259	0.152019	-0.515897	0.605927	0.88941	C6orf47
ENSG00000204387	1226.81	0.730707	0.121278	6.02504	1.69e-09	1.24e-06	C6orf48
ENSG00000112308	3630.01	-0.205595	0.129351	-1.58944	0.111961	0.50499	C6orf62
ENSG00000198663	1248.49	-0.228137	0.148617	-1.53507	0.124767	0.521825	C6orf89
ENSG00000136197	168.69	-0.0424584	0.526008	-0.0807182	0.935666	0.986855	C7orf25
ENSG00000146576	469.033	0.374025	0.184608	2.02606	0.0427591	0.334309	C7orf26
ENSG00000146826	432.894	0.322449	0.188769	1.70817	0.0876051	0.460827	C7orf43
ENSG00000146540	1338.8	0.260698	0.126703	2.05755	0.0396332	0.327046	C7orf50
ENSG00000269955	127.962	1.72189	3.72696	0.462011	0.644074	0.905865	C7orf55-LUC7L2
ENSG00000177335	108.795	-0.398567	0.379157	-1.05119	0.293169	0.721945	C8orf31
ENSG00000182307	1151.57	0.112789	0.156135	0.722384	0.470059	0.834658	C8orf33
ENSG00000164743	60.6472	-0.163636	0.338097	-0.483992	0.628392	0.899141	C8orf48
ENSG00000241852	328.333	-0.12749	0.169289	-0.753091	0.451395	0.824095	C8orf58
ENSG00000176731	962.647	-0.0437389	0.131277	-0.33318	0.738998	0.937251	C8orf59
ENSG00000189376	401.721	0.0450753	0.209213	0.215452	0.829415	0.961448	C8orf76
ENSG00000213563	201.187	0.139781	0.341054	0.409851	0.681915	0.92047	C8orf82
ENSG00000160345	53.8619	0.0904453	0.342131	0.264359	0.791503	0.952856	C9orf116
ENSG00000204352	86.6657	-1.42269	2.66728	-0.533384	0.593768	0.885835	C9orf129
ENSG00000171159	1043.53	0.242788	0.160152	1.51598	0.129524	0.52893	C9orf16
ENSG00000148120	583.446	-0.232768	0.147694	-1.57602	0.115022	0.508816	C9orf3
ENSG00000135045	371.256	-0.175058	0.190225	-0.920268	0.357433	0.766269	C9orf40
ENSG00000165118	547.939	-0.0388039	0.145596	-0.266518	0.78984	0.952456	C9orf64
ENSG00000147894	468.703	0.194863	0.240483	0.8103	0.417768	0.80432	C9orf72
ENSG00000136819	2357.35	-0.0069346	0.157629	-0.0439932	0.96491	0.992361	C9orf78
ENSG00000165181	137.845	-0.0495537	0.339033	-0.146162	0.883794	0.975063	C9orf84
ENSG00000155621	234.292	0.032032	0.226767	0.141255	0.887668	0.975399	C9orf85
ENSG00000063180	64.8679	-0.371631	0.392098	-0.947802	0.34323	0.755679	CA11
ENSG00000074410	450.93	-1.36666	0.259424	-5.26805	1.38e-07	4.41e-05	CA12
ENSG00000185015	90.8406	0.133013	0.326814	0.406999	0.684009	0.921236	CA13
ENSG00000104267	113.41	0.478495	0.24952	1.91766	0.0551544	0.375297	CA2
ENSG00000169239	100.042	-0.0606839	0.379165	-0.160046	0.872845	0.971858	CA5B
ENSG00000186312	125.872	0.0406688	0.296042	0.137375	0.890734	0.975416	CA5BP1
ENSG00000120159	454.692	0.0435147	0.215674	0.201761	0.840103	0.964969	CAAP1
ENSG00000135932	2342.17	-0.521634	0.564927	-0.923365	0.355817	0.765107	CAB39
ENSG00000102547	193.972	-0.220362	0.247747	-0.889464	0.373754	0.776814	CAB39L
ENSG00000099991	1072.27	0.322905	0.110141	2.93173	0.00337079	0.0837744	CABIN1
ENSG00000134508	316.298	0.242209	0.195095	1.24149	0.214424	0.644851	CABLES1
ENSG00000149679	324.604	0.0942943	0.187236	0.503612	0.614534	0.893646	CABLES2
ENSG00000154040	72.4615	0.0650932	0.479605	0.135722	0.892041	0.975416	CABYR
ENSG00000160325	100.382	-0.118571	0.317001	-0.374039	0.708375	0.927022	CACFD1
ENSG00000158966	259.169	0.0403255	0.18052	0.223386	0.823235	0.959463	CACHD1
ENSG00000067191	200.588	-0.338895	0.193306	-1.75315	0.0795756	0.443315	CACNB1
ENSG00000167535	500.083	-0.0709548	0.170883	-0.415225	0.677977	0.919185	CACNB3
ENSG00000105298	743.715	-0.0447824	0.16727	-0.267725	0.788911	0.952038	CACTIN
ENSG00000151893	2057.88	0.133318	0.151853	0.877941	0.379976	0.780372	CACUL1
ENSG00000116161	2631.17	0.407367	0.235307	1.73121	0.0834137	0.452198	CACYBP
ENSG00000084774	1929.95	0.412482	0.152279	2.70873	0.00675411	0.12563	CAD
ENSG00000182985	61.8857	0.0225132	0.42198	0.0533515	0.957452	0.991068	CADM1
ENSG00000105767	613.957	-0.516726	0.155554	-3.32185	0.000894233	0.0368539	CADM4
ENSG00000081803	252.628	-0.33311	0.20828	-1.59934	0.109746	0.501256	CADPS2
ENSG00000104327	847.308	-0.341951	0.308837	-1.10722	0.268198	0.697591	CALB1
ENSG00000012822	632.44	-0.350579	0.211836	-1.65495	0.0979342	0.482211	CALCOCO1
ENSG00000136436	989.847	-0.0498369	0.176783	-0.281909	0.778013	0.948377	CALCOCO2
ENSG00000122786	3265.69	-0.355423	0.138261	-2.57066	0.0101505	0.161104	CALD1
ENSG00000138172	93.6523	-0.959353	0.336175	-2.85373	0.00432093	0.0983202	CALHM2
ENSG00000188820	63.3146	0.94418	0.862158	1.09514	0.273457	0.702831	CALHM6
ENSG00000198668	7407.47	0.020235	0.115406	0.175338	0.860814	0.969609	CALM1
ENSG00000143933	6248.2	-0.141345	0.231702	-0.610029	0.541843	0.865857	CALM2
ENSG00000160014	6678.75	0.0224462	0.10101	0.222217	0.824145	0.959758	CALM3
ENSG00000129007	120.381	-1.13319	0.304804	-3.71776	0.000200998	0.0132614	CALML4
ENSG00000179218	20223	-0.242429	0.153264	-1.58178	0.113701	0.506476	CALR
ENSG00000128595	5261.78	-0.0893008	0.268866	-0.332139	0.739784	0.937264	CALU
ENSG00000183049	188.809	-0.294071	0.250597	-1.17348	0.240602	0.674537	CAMK1D
ENSG00000145349	713.137	-0.350459	0.233204	-1.5028	0.132891	0.53316	CAMK2D
ENSG00000148660	975.775	-0.0241422	0.118657	-0.203462	0.838774	0.964659	CAMK2G
ENSG00000162545	695.339	-0.0286361	0.234853	-0.121932	0.902953	0.979787	CAMK2N1
ENSG00000163888	66.603	-0.43732	0.311719	-1.40293	0.160638	0.572145	CAMK2N2
ENSG00000004660	263.143	-0.210956	0.190829	-1.10547	0.268956	0.698402	CAMKK1
ENSG00000110931	1250.45	0.0198584	0.136332	0.145662	0.884188	0.975091	CAMKK2
ENSG00000143919	148.724	-0.0875643	0.221486	-0.39535	0.692585	0.92423	CAMKMT
ENSG00000164615	511.641	-0.108735	0.20401	-0.532987	0.594043	0.885975	CAMLG
ENSG00000130559	1398.49	0.1012	0.167859	0.602885	0.546585	0.868082	CAMSAP1
ENSG00000118200	1439.08	-0.0222099	0.149213	-0.148847	0.881674	0.974538	CAMSAP2
ENSG00000076826	541.826	0.262028	0.148625	1.76302	0.0778978	0.439247	CAMSAP3
ENSG00000171735	415.618	-0.179964	0.176804	-1.01787	0.308738	0.731556	CAMTA1
ENSG00000108509	504.158	0.0464119	0.14834	0.312874	0.754376	0.940769	CAMTA2
ENSG00000111530	4245.97	0.00581946	0.130487	0.044598	0.964428	0.992345	CAND1
ENSG00000171302	2134.01	0.132998	0.161791	0.822033	0.411058	0.800557	CANT1
ENSG00000127022	15393.8	-0.0709965	0.228603	-0.310567	0.756129	0.941594	CANX
ENSG00000131236	15872.1	0.0304561	0.144617	0.210598	0.833201	0.963394	CAP1
ENSG00000112186	129.12	0.475167	0.231105	2.05606	0.0397764	0.327188	CAP2
ENSG00000042493	1541.19	-0.238426	0.147962	-1.61139	0.107094	0.495759	CAPG
ENSG00000014216	13191.9	0.0483487	0.108895	0.443993	0.657047	0.911395	CAPN1
ENSG00000142330	349.313	0.0879603	0.195299	0.450389	0.65243	0.909784	CAPN10
ENSG00000103326	2365.23	0.168583	0.101755	1.65676	0.0975681	0.480896	CAPN15
ENSG00000162909	16095	0.229013	0.118018	1.94049	0.0523204	0.365902	CAPN2
ENSG00000149260	311.488	-0.0227317	0.259609	-0.0875612	0.930225	0.984915	CAPN5
ENSG00000131375	994.06	0.170795	0.170865	0.999593	0.317508	0.738575	CAPN7
ENSG00000126247	7010.58	0.382811	0.16788	2.28027	0.0225919	0.243691	CAPNS1
ENSG00000256812	387.858	-0.838854	0.237595	-3.5306	0.000414621	0.0216841	CAPNS2
ENSG00000135387	12949.4	0.0680665	0.114647	0.593703	0.552711	0.87082	CAPRIN1
ENSG00000110888	2688.04	0.365808	0.108788	3.36259	0.000772143	0.0337108	CAPRIN2
ENSG00000180881	46.733	-0.453992	0.454013	-0.999954	0.317333	0.738285	CAPS2
ENSG00000116489	8613.69	-0.622698	0.292354	-2.12995	0.0331758	0.29836	CAPZA1
ENSG00000198898	2351.95	-0.0366616	0.262411	-0.139711	0.888889	0.975399	CAPZA2
ENSG00000077549	5232.42	0.118386	0.120174	0.98512	0.324565	0.743379	CAPZB
ENSG00000100065	1270.82	0.236265	0.19713	1.19852	0.230713	0.664477	CARD10
ENSG00000198286	1610.39	0.165238	0.170022	0.97186	0.33112	0.748697	CARD11
ENSG00000204397	338.962	0.0070465	0.160106	0.0440114	0.964895	0.992361	CARD16
ENSG00000165233	634.325	-0.130836	0.170853	-0.76578	0.443807	0.820079	CARD19
ENSG00000132357	1519.77	0.0252752	0.159531	0.158435	0.874114	0.971858	CARD6
ENSG00000105483	286.139	-0.0120629	0.208985	-0.0577216	0.95397	0.991068	CARD8
ENSG00000268001	229.531	-0.140699	0.223205	-0.630359	0.528459	0.86187	CARD8-AS1
ENSG00000153048	943.903	-0.103276	0.189157	-0.545978	0.585081	0.882914	CARHSP1
ENSG00000142453	886.31	0.169825	0.153833	1.10396	0.269612	0.698615	CARM1
ENSG00000079691	906.821	-0.205666	0.136685	-1.50467	0.132409	0.532337	CARMIL1
ENSG00000156017	720.091	-0.150536	0.195267	-0.770922	0.440753	0.818186	CARNMT1
ENSG00000110619	1717.14	0.0211846	0.122192	0.173371	0.86236	0.970023	CARS
ENSG00000134905	977.176	0.113302	0.190737	0.594025	0.552496	0.87082	CARS2
ENSG00000108349	1184.93	0.253694	0.166427	1.52436	0.12742	0.52622	CASC3
ENSG00000166734	882.23	0.247131	0.332538	0.743164	0.457382	0.826716	CASC4
ENSG00000249395	272.004	-0.1637	0.23444	-0.698262	0.485013	0.839159	CASC9
ENSG00000127995	384.875	-0.299451	0.165658	-1.80765	0.0706614	0.420057	CASD1
ENSG00000147044	1491.18	0.100109	0.114962	0.870801	0.383863	0.783273	CASK
ENSG00000177303	319.017	0.0792342	0.189063	0.419089	0.675151	0.918068	CASKIN2
ENSG00000137752	1398.12	-0.208649	0.147677	-1.41287	0.157693	0.56674	CASP1
ENSG00000003400	454.697	-0.735324	0.329322	-2.23284	0.0255595	0.256694	CASP10
ENSG00000106144	711.801	-0.425369	0.668279	-0.636513	0.524442	0.859538	CASP2
ENSG00000164305	1422.47	-0.226798	0.138561	-1.63681	0.101669	0.487111	CASP3
ENSG00000196954	1928.68	0.202402	0.0989998	2.04447	0.0409075	0.330699	CASP4
ENSG00000138794	389.2	0.0210784	0.198827	0.106013	0.915572	0.98314	CASP6
ENSG00000165806	1129.1	0.0223124	0.335624	0.0664805	0.946995	0.989115	CASP7
ENSG00000064012	1076.06	0.221853	0.138071	1.60681	0.108097	0.49841	CASP8
ENSG00000118412	706.997	-0.12037	0.246175	-0.488962	0.624869	0.898021	CASP8AP2
ENSG00000132906	364.998	0.424298	0.244648	1.73432	0.0828619	0.450701	CASP9
ENSG00000153113	5752.93	-0.146823	0.094429	-1.55485	0.119983	0.516467	CAST
ENSG00000239282	55.2542	-0.39105	0.439271	-0.890225	0.373345	0.776814	CASTOR1
ENSG00000239521	104.076	-0.668738	0.251435	-2.65969	0.00782136	0.137676	CASTOR3
ENSG00000130940	248.776	-0.309354	0.19407	-1.59403	0.110929	0.503096	CASZ1
ENSG00000121691	1245.15	-0.461757	0.155815	-2.9635	0.00304165	0.07865	CAT
ENSG00000175294	93.9647	0.676245	0.284927	2.3734	0.0176253	0.212385	CATSPER1
ENSG00000166762	83.2188	0.271139	0.329855	0.821996	0.411079	0.800557	CATSPER2
ENSG00000205771	55.7207	0.0995875	0.399463	0.249303	0.803126	0.956184	CATSPER2P1
ENSG00000219435	36.9667	0.116613	0.723661	0.161144	0.87198	0.971858	CATSPERZ
ENSG00000105974	38960	-0.364788	0.145945	-2.49948	0.0124376	0.177597	CAV1
ENSG00000105971	7530.8	-0.569074	0.145708	-3.90559	9.4e-05	0.00804041	CAV2
ENSG00000177469	8355.61	-0.012062	0.130968	-0.0920991	0.926619	0.984357	CAVIN1
ENSG00000168497	426.785	-0.18272	0.190309	-0.960123	0.336993	0.752494	CAVIN2
ENSG00000170955	465.022	0.195143	0.218475	0.893204	0.371748	0.77611	CAVIN3
ENSG00000099625	140.128	0.412129	0.270744	1.52221	0.127956	0.526571	CBARP
ENSG00000078699	716.46	-0.217106	0.199294	-1.08937	0.27599	0.704661	CBFA2T2
ENSG00000067955	1988.75	-0.451446	0.210205	-2.14765	0.0317417	0.289712	CBFB
ENSG00000110395	1729.63	0.231411	0.185116	1.25009	0.211268	0.641301	CBL
ENSG00000114423	491.068	-0.252083	0.188213	-1.33935	0.180457	0.601238	CBLB
ENSG00000142273	934.474	-0.207699	0.155555	-1.33521	0.181808	0.603144	CBLC
ENSG00000105879	639.668	-0.623826	0.226417	-2.7552	0.00586555	0.117461	CBLL1
ENSG00000159228	1667.15	-0.39326	0.142096	-2.76755	0.00564786	0.114934	CBR1
ENSG00000159231	140.413	-0.341456	0.305144	-1.119	0.26314	0.694417	CBR3
ENSG00000236830	49.6482	0.64035	0.468267	1.36749	0.171472	0.589456	CBR3-AS1
ENSG00000145439	349.73	-0.343525	0.17917	-1.91731	0.055199	0.375297	CBR4
ENSG00000172785	609.561	0.0971843	0.155511	0.624934	0.532014	0.863419	CBWD1
ENSG00000136682	764.538	0.107868	0.129294	0.834286	0.40412	0.797059	CBWD2
ENSG00000215126	292.995	0.184536	0.178648	1.03296	0.301624	0.727926	CBWD2
ENSG00000147996	444.695	-0.00716866	0.158762	-0.0451534	0.963985	0.992345	CBWD5
ENSG00000196873	366.556	-0.162107	0.158383	-1.02351	0.306066	0.730082	CBWD5
ENSG00000108468	1897.34	-0.0288042	0.113174	-0.254512	0.7991	0.955537	CBX1
ENSG00000173894	174.559	0.0606874	0.263016	0.230737	0.817519	0.958878	CBX2
ENSG00000122565	7222.01	-0.00396228	0.158987	-0.024922	0.980117	0.996609	CBX3
ENSG00000141582	762.587	-0.176722	0.154855	-1.14121	0.253781	0.686879	CBX4
ENSG00000094916	4310.15	-0.265049	0.179779	-1.47431	0.140398	0.541003	CBX5
ENSG00000183741	1279.83	0.0595478	0.172308	0.34559	0.729651	0.935536	CBX6
ENSG00000100307	202.022	-0.0558376	0.258587	-0.215933	0.82904	0.961448	CBX7
ENSG00000141570	174.173	0.108081	0.210086	0.51446	0.606931	0.889862	CBX8
ENSG00000100211	354.752	0.0393386	0.209802	0.187503	0.851266	0.967979	CBY1
ENSG00000132024	797.565	-0.134582	0.119764	-1.12372	0.261131	0.693258	CC2D1A
ENSG00000154222	828.481	0.269071	0.211831	1.27021	0.204008	0.63248	CC2D1B
ENSG00000048342	180.897	0.294096	0.218104	1.34842	0.177524	0.59679	CC2D2A
ENSG00000060339	2467.98	0.124504	0.129434	0.961906	0.336097	0.751747	CCAR1
ENSG00000158941	3918.56	0.0992267	0.121911	0.813925	0.415688	0.802732	CCAR2
ENSG00000254166	1198.77	0.769559	0.33168	2.32018	0.0203309	0.231523	CCAT1
ENSG00000135736	127.967	-0.12011	0.247485	-0.485323	0.627447	0.898524	CCDC102A
ENSG00000167131	62.2303	-0.142646	0.394644	-0.361455	0.71776	0.930596	CCDC103
ENSG00000159884	96.6892	0.119949	0.333584	0.359577	0.719163	0.93143	CCDC107
ENSG00000164221	90.8267	0.284373	0.277678	1.02411	0.305782	0.730082	CCDC112
ENSG00000103021	266.205	0.289301	0.221445	1.30642	0.191408	0.6161	CCDC113
ENSG00000136710	723.903	-0.226193	0.261161	-0.866104	0.386433	0.784652	CCDC115
ENSG00000159873	683.496	-0.0685652	0.125473	-0.546455	0.584753	0.882914	CCDC117
ENSG00000160799	499.123	-0.0566059	0.155256	-0.364597	0.715412	0.92974	CCDC12
ENSG00000147144	548.554	0.121619	0.233543	0.520756	0.602537	0.888791	CCDC120
ENSG00000151773	108.304	-0.0829529	0.320639	-0.258711	0.795858	0.954613	CCDC122
ENSG00000007080	1110.3	-0.0922584	0.148447	-0.621492	0.534276	0.864203	CCDC124
ENSG00000183323	107.646	0.0439447	0.319015	0.137751	0.890437	0.975416	CCDC125
ENSG00000169193	91.6747	-0.260541	0.282487	-0.922311	0.356366	0.765657	CCDC126
ENSG00000164366	869.753	0.0550729	0.114942	0.479137	0.631841	0.900278	CCDC127
ENSG00000104957	228.441	-0.00439308	0.197384	-0.0222566	0.982243	0.996878	CCDC130
ENSG00000100147	108.963	0.588556	0.299363	1.96603	0.0492953	0.356754	CCDC134
ENSG00000185298	365.683	-0.665831	0.446309	-1.49186	0.135736	0.536689	CCDC137
ENSG00000163006	227.27	0.239738	0.224434	1.06819	0.285436	0.71422	CCDC138
ENSG00000175455	1317.77	-0.278138	0.219933	-1.26465	0.205997	0.634886	CCDC14
ENSG00000135637	393.453	0.68121	0.358925	1.89792	0.0577069	0.382817	CCDC142
ENSG00000154874	325.074	0.249703	0.292984	0.852276	0.394061	0.789249	CCDC144B
ENSG00000135205	177.578	-0.688541	0.238765	-2.88376	0.00392955	0.093273	CCDC146
ENSG00000149548	98.27	-0.0810365	0.261109	-0.310355	0.756291	0.941604	CCDC15
ENSG00000144395	96.5447	0.0807515	0.324351	0.248963	0.803389	0.956184	CCDC150
ENSG00000198865	591.171	-0.142355	0.21177	-0.672215	0.501447	0.849443	CCDC152
ENSG00000183401	33.6521	0.290286	0.427813	0.678535	0.497432	0.846167	CCDC159
ENSG00000198937	136.626	0.0865246	0.256823	0.336904	0.736189	0.937083	CCDC167
ENSG00000154781	140.049	-0.266202	0.325134	-0.818748	0.41293	0.801412	CCDC174
ENSG00000122483	756.144	-0.0142587	0.154546	-0.0922618	0.92649	0.984325	CCDC18
ENSG00000165813	1095.41	-0.242948	0.180312	-1.34737	0.177861	0.597458	CCDC186
ENSG00000196118	79.2607	-0.010829	0.418011	-0.025906	0.979332	0.99652	CCDC189
ENSG00000223745	103.74	-0.0541031	0.522252	-0.103596	0.91749	0.98314	CCDC18-AS1
ENSG00000185860	471.2	-0.538417	0.153383	-3.51028	0.000447628	0.0226742	CCDC190
ENSG00000101997	286.02	0.10094	0.1745	0.578451	0.562959	0.87481	CCDC22
ENSG00000159214	292.311	-0.170249	0.329425	-0.516806	0.605292	0.889398	CCDC24
ENSG00000147419	2024.3	0.0419016	0.127094	0.329691	0.741634	0.938025	CCDC25
ENSG00000024862	414.26	-0.18695	0.214131	-0.873066	0.382627	0.782489	CCDC28A
ENSG00000160050	166.969	-0.136916	0.200575	-0.682621	0.494847	0.844724	CCDC28B
ENSG00000128891	578.072	0.164307	0.132445	1.24057	0.214765	0.645255	CCDC32
ENSG00000109881	412.081	-0.0378519	0.18213	-0.207829	0.835363	0.964374	CCDC34
ENSG00000180329	655.669	0.00679656	0.153243	0.0443517	0.964624	0.992345	CCDC43
ENSG00000108588	2863.51	0.253136	0.151233	1.67382	0.0941666	0.474953	CCDC47
ENSG00000152492	1447.14	-0.0450919	0.10679	-0.422247	0.672845	0.917274	CCDC50
ENSG00000164051	628.78	0.188899	0.135813	1.39088	0.164261	0.579147	CCDC51
ENSG00000176155	355.945	-0.214189	0.210668	-1.01671	0.30929	0.732025	CCDC57
ENSG00000160124	624.55	0.266796	0.187073	1.42616	0.153821	0.561453	CCDC58
ENSG00000133773	609.468	0.24938	0.15377	1.62177	0.104852	0.491617	CCDC59
ENSG00000108091	1739.53	0.197056	0.139286	1.41476	0.157138	0.566249	CCDC6
ENSG00000183273	80.6135	-0.17429	0.308619	-0.564743	0.572249	0.878311	CCDC60
ENSG00000104983	225.388	-0.293807	0.22291	-1.31805	0.187487	0.610963	CCDC61
ENSG00000180376	303.936	0.028721	0.169277	0.169668	0.865271	0.970965	CCDC66
ENSG00000166510	193.455	-0.149873	0.20799	-0.720577	0.47117	0.834671	CCDC68
ENSG00000198624	715.12	0.248527	0.303302	0.819404	0.412556	0.801381	CCDC69
ENSG00000177352	348.027	-0.0819178	0.158788	-0.515895	0.605928	0.88941	CCDC71
ENSG00000253276	499.46	-0.0378598	0.19391	-0.195244	0.845202	0.966246	CCDC71L
ENSG00000120647	427.386	-0.242663	0.192673	-1.25946	0.207865	0.637549	CCDC77
ENSG00000162004	50.1992	0.184854	0.462027	0.400093	0.689088	0.923367	CCDC78
ENSG00000091986	370.439	0.00244452	0.287591	0.00849997	0.993218	0.998	CCDC80
ENSG00000149231	953.895	-0.224682	0.216621	-1.03721	0.299636	0.72626	CCDC82
ENSG00000186166	279.02	0.292292	0.163949	1.78282	0.0746159	0.430579	CCDC84
ENSG00000175602	1234.45	0.451231	0.160116	2.81815	0.00483017	0.104203	CCDC85B
ENSG00000205476	3026.52	0.183593	0.108777	1.68779	0.0914506	0.469802	CCDC85C
ENSG00000110104	1256.76	0.76448	0.191552	3.99099	6.58e-05	0.00608858	CCDC86
ENSG00000115355	875.866	0.0292747	0.272885	0.107279	0.914568	0.982932	CCDC88A
ENSG00000168071	139.232	-0.0360578	0.263065	-0.137068	0.890977	0.975416	CCDC88B
ENSG00000015133	1547.21	-0.0546404	0.121616	-0.449286	0.653225	0.910015	CCDC88C
ENSG00000105321	589.42	0.100892	0.141261	0.714222	0.47509	0.835562	CCDC9
ENSG00000137500	805.844	-0.0788124	0.118034	-0.66771	0.504319	0.850733	CCDC90B
ENSG00000123106	641.336	-0.275044	0.222846	-1.23423	0.217116	0.649204	CCDC91
ENSG00000119242	181.487	-0.010995	0.188218	-0.0584164	0.953417	0.991001	CCDC92
ENSG00000125633	1808.45	0.159418	0.150571	1.05876	0.289711	0.718927	CCDC93
ENSG00000142039	855.496	-0.0278533	0.150253	-0.185376	0.852934	0.968298	CCDC97
ENSG00000188549	578.742	-0.00775991	0.181883	-0.0426642	0.965969	0.992687	CCDC9B
ENSG00000204536	292.493	-0.129637	0.188665	-0.687126	0.492003	0.843213	CCHCR1
ENSG00000115009	154.591	1.06937	0.320507	3.33648	0.000848464	0.0360793	CCL20
ENSG00000151882	565.541	0.142301	0.139383	1.02094	0.307284	0.731068	CCL28
ENSG00000271503	817.584	-0.869211	0.22034	-3.94485	7.98e-05	0.00712005	CCL5
ENSG00000136280	1370.15	-0.155177	0.109928	-1.41163	0.15806	0.56679	CCM2
ENSG00000145386	2516.67	-0.137417	0.150995	-0.910075	0.362783	0.769199	CCNA2
ENSG00000134057	4471.07	0.430547	0.151891	2.83457	0.00458868	0.101371	CCNB1
ENSG00000100814	924.999	0.270705	0.235246	1.15073	0.249844	0.682882	CCNB1IP1
ENSG00000157456	2393.53	0.226905	0.154041	1.47302	0.140746	0.541243	CCNB2
ENSG00000112237	1401.09	0.13	0.282835	0.459633	0.64578	0.906221	CCNC
ENSG00000110092	5936.93	-0.0916934	0.142834	-0.641956	0.520901	0.858426	CCND1
ENSG00000112576	796.506	0.146964	0.220018	0.667964	0.504157	0.850733	CCND3
ENSG00000166946	1704.24	0.084577	0.166636	0.507555	0.611766	0.892076	CCNDBP1
ENSG00000105173	414.776	-0.177216	0.179737	-0.985974	0.324146	0.743379	CCNE1
ENSG00000175305	470.783	-0.381343	0.202923	-1.87926	0.0602096	0.391975	CCNE2
ENSG00000162063	1452.89	0.176775	0.170276	1.03817	0.299191	0.725874	CCNF
ENSG00000113328	977.337	0.0936076	0.174574	0.536207	0.591816	0.884608	CCNG1
ENSG00000138764	895.368	-0.455309	0.19192	-2.37239	0.0176733	0.212788	CCNG2
ENSG00000134480	729.627	0.276791	0.147981	1.87045	0.0614214	0.395041	CCNH
ENSG00000118816	3363.96	0.0972778	0.134602	0.722706	0.46986	0.834658	CCNI
ENSG00000205089	50.9473	-0.00417302	0.330338	-0.0126326	0.989921	0.997298	CCNI2
ENSG00000107443	231.429	0.201188	0.276178	0.728474	0.466323	0.832143	CCNJ
ENSG00000135083	243.001	0.127122	0.247403	0.513828	0.607372	0.890155	CCNJL
ENSG00000090061	1313.41	0.244627	0.14614	1.67392	0.0941459	0.474953	CCNK
ENSG00000163660	2107.75	-0.110033	0.191231	-0.575395	0.565024	0.875703	CCNL1
ENSG00000221978	2454	-0.795308	0.296805	-2.67957	0.00737175	0.132108	CCNL2
ENSG00000152669	165.794	0.0542825	0.20893	0.259812	0.795009	0.954387	CCNO
ENSG00000262919	728.331	0.222452	0.312142	0.712665	0.476053	0.836147	CCNQ
ENSG00000129315	1853.54	-0.022368	0.108992	-0.205226	0.837396	0.964659	CCNT1
ENSG00000082258	510.902	-0.42042	0.403964	-1.04074	0.297997	0.725155	CCNT2
ENSG00000108100	1434.8	-0.111987	0.103567	-1.08129	0.279567	0.707315	CCNY
ENSG00000163249	1243.57	0.118704	0.115761	1.02542	0.305165	0.729971	CCNYL1
ENSG00000103540	381.273	-0.182625	0.307358	-0.594177	0.552393	0.87082	CCP110
ENSG00000260916	903.098	-0.644884	0.269373	-2.39402	0.016665	0.206913	CCPG1
ENSG00000121797	108.741	0.223533	0.384378	0.581544	0.560874	0.873786	CCRL2
ENSG00000173992	340.886	0.0555978	0.156356	0.355585	0.722151	0.932755	CCS
ENSG00000154429	233.326	-0.416753	0.236862	-1.75947	0.0784973	0.440605	CCSAP
ENSG00000107771	618.028	0.0410246	0.138275	0.296689	0.766704	0.944852	CCSER2
ENSG00000166226	9148.74	0.23369	0.152205	1.53536	0.124695	0.521825	CCT2
ENSG00000163468	8044.56	0.280588	0.151159	1.85624	0.0634192	0.399609	CCT3
ENSG00000115484	6769.26	0.141271	0.142632	0.990463	0.321948	0.741641	CCT4
ENSG00000150753	21469.2	0.084221	0.16765	0.502362	0.615413	0.894111	CCT5
ENSG00000146731	12288.2	0.233854	0.163439	1.43083	0.152479	0.560115	CCT6A
ENSG00000228409	158.73	0.160302	0.233902	0.685339	0.49313	0.843809	CCT6P1
ENSG00000234585	132.733	0.0186031	0.290845	0.0639622	0.949	0.989697	CCT6P3
ENSG00000135624	5989.73	0.162414	0.160272	1.01336	0.310886	0.732932	CCT7
ENSG00000156261	7309.58	0.128153	0.117363	1.09194	0.274859	0.703456	CCT8
ENSG00000122674	1685.94	0.0885453	0.117243	0.755228	0.450112	0.823387	CCZ1
ENSG00000146574	1544.18	0.045312	0.133857	0.338509	0.73498	0.93658	CCZ1B
ENSG00000156535	7899.49	-0.70721	0.155364	-4.55196	5.31e-06	0.000977451	CD109
ENSG00000170458	73.4636	0.159496	0.325341	0.490242	0.623963	0.898004	CD14
ENSG00000177697	4912.29	-0.170843	0.151412	-1.12833	0.259181	0.692655	CD151
ENSG00000177675	318.039	0.247003	0.211257	1.16921	0.242321	0.675095	CD163L1
ENSG00000135535	4290.37	-0.318615	0.156052	-2.04172	0.0411795	0.331441	CD164
ENSG00000204936	141.281	-0.496057	0.304449	-1.62936	0.103237	0.489345	CD177
ENSG00000272398	6210.97	0.205625	0.295309	0.696305	0.486238	0.83987	CD24
ENSG00000120217	380.864	-0.221742	0.408548	-0.542756	0.587298	0.883573	CD274
ENSG00000103855	1028.41	-0.0244797	0.288645	-0.0848089	0.932413	0.985386	CD276
ENSG00000215039	247.535	0.177285	0.204915	0.865167	0.386947	0.784987	CD27-AS1
ENSG00000198087	2709.19	-0.272377	0.165626	-1.64453	0.100066	0.484598	CD2AP
ENSG00000169217	2636.15	0.0598186	0.13767	0.434506	0.663921	0.913691	CD2BP2
ENSG00000241399	175.128	-0.761761	0.331113	-2.30061	0.0214139	0.236712	CD302
ENSG00000167775	1084.89	-0.235997	0.17091	-1.38083	0.167331	0.582907	CD320
ENSG00000117877	926.948	0.152668	0.422575	0.361281	0.717889	0.930682	CD3EAP
ENSG00000101017	64.5326	0.0579122	0.363616	0.159267	0.873458	0.971858	CD40
ENSG00000026508	6347.15	-0.106294	0.273663	-0.388411	0.697712	0.924981	CD44
ENSG00000117335	5321.52	-0.473237	0.13028	-3.63247	0.000280726	0.0170887	CD46
ENSG00000196776	5193.58	-0.322772	0.109985	-2.93468	0.00333888	0.0834041	CD47
ENSG00000169442	36.6742	0.0155494	0.738842	0.0210456	0.983209	0.997102	CD52
ENSG00000196352	3207.55	-0.0244371	0.127707	-0.191353	0.848249	0.967274	CD55
ENSG00000116815	1115.9	-0.500812	0.174202	-2.8749	0.00404159	0.0943871	CD58
ENSG00000085063	13890.6	-0.2082	0.113632	-1.83223	0.0669168	0.41124	CD59
ENSG00000013725	129.132	0.015265	0.224423	0.0680188	0.945771	0.989115	CD6
ENSG00000135404	9118.45	0.0550693	0.136334	0.40393	0.686264	0.922101	CD63
ENSG00000129226	335.934	1.18843	0.198108	5.99892	1.99e-09	1.33e-06	CD68
ENSG00000110848	47.6382	0.833935	0.550125	1.5159	0.129544	0.52893	CD69
ENSG00000019582	100.249	0.663807	0.305547	2.17252	0.0298162	0.278666	CD74
ENSG00000085117	2580.58	-0.394142	0.123212	-3.19891	0.0013795	0.047533	CD82
ENSG00000112149	260.932	0.768868	0.352231	2.18285	0.0290466	0.275008	CD83
ENSG00000114013	154.94	0.240835	0.363078	0.663313	0.50713	0.852308	CD86
ENSG00000010278	10291.2	-0.608258	0.135823	-4.47832	7.52e-06	0.00125338	CD9
ENSG00000002586	975.309	-0.261681	0.212428	-1.23185	0.218004	0.650212	CD99
ENSG00000102181	1248.64	0.261114	0.173707	1.50319	0.132791	0.53316	CD99L2
ENSG00000158825	801.53	0.586461	0.242912	2.4143	0.0157657	0.200831	CDA
ENSG00000102543	254.699	0.235067	0.193941	1.21205	0.225491	0.659967	CDADC1
ENSG00000140326	748.995	0.0109494	0.184271	0.0594201	0.952618	0.99087	CDAN1
ENSG00000151465	2429.38	0.22458	0.135595	1.65626	0.0976701	0.481092	CDC123
ENSG00000079335	301.149	0.191226	0.168513	1.13479	0.256464	0.690699	CDC14A
ENSG00000081377	1097.14	-0.231544	0.108757	-2.129	0.0332542	0.298699	CDC14B
ENSG00000130177	1928.27	0.0588251	0.117063	0.502507	0.615311	0.894111	CDC16
ENSG00000117399	5279.22	0.568152	0.161341	3.52144	0.000429216	0.0221581	CDC20
ENSG00000094880	1720.65	0.0143921	0.105758	0.136085	0.891754	0.975416	CDC23
ENSG00000164045	1128.18	0.133741	0.166793	0.801843	0.422644	0.807369	CDC25A
ENSG00000101224	4965.79	0.0993827	0.280345	0.354501	0.722964	0.933094	CDC25B
ENSG00000158402	325.087	-0.111119	0.181092	-0.613606	0.539476	0.864898	CDC25C
ENSG00000176386	1053.82	0.160242	0.146182	1.09618	0.272999	0.702216	CDC26
ENSG00000004897	2366.19	-0.0690151	0.171962	-0.40134	0.68817	0.922849	CDC27
ENSG00000099804	739.459	0.301315	0.165461	1.82106	0.0685975	0.415476	CDC34
ENSG00000105401	2872.67	-0.0943037	0.169617	-0.555981	0.578224	0.881166	CDC37
ENSG00000106993	345.395	-0.132636	0.205705	-0.644789	0.519064	0.857306	CDC37L1
ENSG00000168438	926.422	-0.0430713	0.140864	-0.305765	0.759784	0.94263	CDC40
ENSG00000070831	10224.6	0.165542	0.157143	1.05344	0.292137	0.72154	CDC42
ENSG00000143776	2419.97	-0.232413	0.152397	-1.52505	0.127247	0.52622	CDC42BPA
ENSG00000198752	3442.34	0.177225	0.11459	1.5466	0.12196	0.519562	CDC42BPB
ENSG00000171219	1135.9	-0.20079	0.118912	-1.68856	0.0913047	0.46938	CDC42BPG
ENSG00000128283	759.103	0.174014	0.164466	1.05805	0.290031	0.71917	CDC42EP1
ENSG00000149798	640.656	0.490324	0.240098	2.04218	0.0411337	0.331254	CDC42EP2
ENSG00000163171	1074.3	-0.112806	0.127336	-0.885893	0.375675	0.77729	CDC42EP3
ENSG00000179604	1560.41	-0.2003	0.127741	-1.56802	0.116876	0.511329	CDC42EP4
ENSG00000167617	598.471	-0.371164	0.178407	-2.08043	0.0374863	0.316248	CDC42EP5
ENSG00000197622	2502.13	-0.429301	0.28186	-1.5231	0.127734	0.526244	CDC42SE1
ENSG00000158985	1143.09	-0.085138	0.151731	-0.561113	0.57472	0.879719	CDC42SE2
ENSG00000093009	1042.45	0.00284953	0.166127	0.0171528	0.986315	0.997177	CDC45
ENSG00000096401	2087.65	0.106379	0.136348	0.780203	0.435272	0.815334	CDC5L
ENSG00000094804	2497.44	0.255754	0.16628	1.53809	0.124026	0.521372	CDC6
ENSG00000097046	1023.42	-0.0418115	0.138695	-0.301463	0.763062	0.943519	CDC7
ENSG00000134371	1308.1	0.0784157	0.189343	0.414147	0.678767	0.919185	CDC73
ENSG00000184661	1503.86	0.229886	0.155573	1.47768	0.139495	0.540195	CDCA2
ENSG00000111665	713.564	0.0557394	0.155836	0.357679	0.720584	0.931876	CDCA3
ENSG00000170779	1811.18	-0.0375033	0.152885	-0.245305	0.80622	0.956184	CDCA4
ENSG00000146670	2639.32	0.218188	0.153653	1.42	0.155606	0.563484	CDCA5
ENSG00000144354	704.437	-0.437472	0.230643	-1.89675	0.0578608	0.3833	CDCA7
ENSG00000164649	1567.94	0.0403367	0.164406	0.245348	0.806187	0.956184	CDCA7L
ENSG00000134690	2165.83	0.269012	0.149059	1.80474	0.0711159	0.421029	CDCA8
ENSG00000163814	5358.06	0.559293	0.181344	3.08415	0.00204134	0.0613072	CDCP1
ENSG00000039068	12879.4	-0.217051	0.133612	-1.62449	0.104272	0.490928	CDH1
ENSG00000140937	939.965	-0.177322	0.149079	-1.18945	0.234262	0.668352	CDH11
ENSG00000139880	611.074	-0.162156	0.149897	-1.08178	0.279348	0.707078	CDH24
ENSG00000062038	7695.16	-0.110543	0.14529	-0.760842	0.446752	0.821449	CDH3
ENSG00000179776	336.174	0.256485	0.338041	0.758742	0.448007	0.822297	CDH5
ENSG00000113361	549.761	0.273397	0.396851	0.688917	0.490876	0.842801	CDH6
ENSG00000150394	129.922	0.106194	0.335819	0.316224	0.751832	0.940038	CDH8
ENSG00000128536	68.7941	-0.0935722	0.308165	-0.303643	0.7614	0.943078	CDHR3
ENSG00000089486	585.823	0.670869	0.225371	2.97673	0.00291343	0.0769913	CDIP1
ENSG00000103502	921.827	-0.604938	0.249588	-2.42375	0.0153614	0.197819	CDIPT
ENSG00000170312	3314.81	-0.0890684	0.184789	-0.482001	0.629805	0.899993	CDK1
ENSG00000185324	839.234	-0.279783	0.221114	-1.26533	0.205752	0.634886	CDK10
ENSG00000008128	812.851	0.0333875	0.135154	0.247033	0.804883	0.956184	CDK11A
ENSG00000248333	1530.01	0.0754692	0.122309	0.617037	0.53721	0.864392	CDK11B
ENSG00000167258	1834.34	0.171896	0.160834	1.06878	0.285169	0.713917	CDK12
ENSG00000065883	1822.94	-0.0840138	0.102315	-0.82113	0.411572	0.800823	CDK13
ENSG00000058091	1106.15	-0.178903	0.146548	-1.22078	0.22217	0.656015	CDK14
ENSG00000102225	1637.68	0.158895	0.144285	1.10126	0.270783	0.699894	CDK16
ENSG00000059758	883.998	0.0681246	0.12577	0.54166	0.588053	0.883573	CDK17
ENSG00000117266	372.375	-0.346542	0.361949	-0.957434	0.338348	0.753175	CDK18
ENSG00000155111	385.747	-0.301322	0.182705	-1.64922	0.099102	0.483248	CDK19
ENSG00000123374	1455.14	0.122871	0.204182	0.601769	0.547328	0.868605	CDK2
ENSG00000156345	94.6435	0.189021	0.33079	0.571423	0.567713	0.875703	CDK20
ENSG00000111328	1123.55	-0.208277	0.22465	-0.927116	0.353866	0.763407	CDK2AP1
ENSG00000167797	588.561	-0.0710991	0.156521	-0.454245	0.649652	0.908243	CDK2AP2
ENSG00000250506	42.0049	-0.31126	0.587773	-0.529558	0.596419	0.886196	CDK3
ENSG00000135446	2590.44	0.133336	0.140415	0.949583	0.342324	0.755679	CDK4
ENSG00000164885	470.343	0.271922	0.165836	1.6397	0.101067	0.486075	CDK5
ENSG00000176749	125.18	-0.418421	0.266197	-1.57185	0.115986	0.510117	CDK5R1
ENSG00000101391	1091.05	0.227861	0.128695	1.77055	0.0766363	0.435515	CDK5RAP1
ENSG00000136861	1950.7	-0.0512466	0.0983699	-0.520958	0.602396	0.888791	CDK5RAP2
ENSG00000108465	888.039	0.257993	0.293514	0.87898	0.379412	0.780085	CDK5RAP3
ENSG00000105810	5037.48	0.205505	0.188728	1.0889	0.276199	0.704893	CDK6
ENSG00000134058	691.601	0.107252	0.149763	0.716146	0.473901	0.835562	CDK7
ENSG00000132964	836.924	0.254221	0.131211	1.9375	0.0526845	0.367173	CDK8
ENSG00000136807	1525.63	-0.137412	0.105872	-1.29791	0.194318	0.619788	CDK9
ENSG00000145996	344.778	0.0176728	0.178048	0.0992587	0.920933	0.983349	CDKAL1
ENSG00000100490	72.787	0.0240336	0.285053	0.0843127	0.932808	0.985453	CDKL1
ENSG00000124762	4291.12	-0.0490201	0.179646	-0.272871	0.784953	0.950303	CDKN1A
ENSG00000111276	1091.19	-0.244027	0.124873	-1.95421	0.0506767	0.361068	CDKN1B
ENSG00000168564	479.955	0.599927	0.463498	1.29435	0.195546	0.621263	CDKN2AIP
ENSG00000237190	286.78	-0.00581604	0.192435	-0.0302235	0.975889	0.995649	CDKN2AIPNL
ENSG00000123080	252.831	-0.457308	0.214478	-2.13219	0.032991	0.297424	CDKN2C
ENSG00000129355	136.837	-0.00459447	0.231799	-0.0198209	0.984186	0.997177	CDKN2D
ENSG00000100526	671.53	0.38366	0.23431	1.6374	0.101547	0.486982	CDKN3
ENSG00000064309	121.428	-0.0451048	0.271572	-0.166088	0.868088	0.971445	CDON
ENSG00000205643	51.114	-0.118354	0.450507	-0.262712	0.792772	0.953413	CDPF1
ENSG00000140743	1050.95	0.198428	0.14781	1.34245	0.179449	0.599507	CDR2
ENSG00000109089	504.657	-0.112996	0.174415	-0.647856	0.517078	0.856172	CDR2L
ENSG00000241322	234.896	0.389924	0.246765	1.58014	0.114075	0.506944	CDRT1
ENSG00000239704	94.8557	0.584603	1.79982	0.324812	NA	NA	CDRT4
ENSG00000163624	923.778	-0.181202	0.144249	-1.25618	0.209052	0.638459	CDS1
ENSG00000101290	1975.39	0.0586856	0.143873	0.407899	0.683348	0.921072	CDS2
ENSG00000167513	1232.28	0.285283	0.131963	2.16184	0.0306306	0.282373	CDT1
ENSG00000091527	3897.95	0.00442939	0.352449	0.0125675	0.989973	0.997298	CDV3
ENSG00000153046	1191.53	0.296266	0.149172	1.98608	0.0470246	0.348528	CDYL
ENSG00000166446	441.744	-0.0977367	0.21717	-0.450046	0.652677	0.909784	CDYL2
ENSG00000079385	2997.33	-0.178573	0.108096	-1.65199	0.0985375	0.482211	CEACAM1
ENSG00000186567	74.958	0.384644	0.330061	1.16537	0.243868	0.675967	CEACAM19
ENSG00000105388	8485.88	-0.264631	0.264481	-1.00057	0.317036	0.737995	CEACAM5
ENSG00000086548	41780.3	-0.416934	0.228464	-1.82495	0.0680093	0.413309	CEACAM6
ENSG00000007306	273.099	1.13672	0.375581	3.02658	0.00247341	0.0693168	CEACAM7
ENSG00000245848	580.048	-0.576533	0.173863	-3.31602	0.000913104	0.0371869	CEBPA
ENSG00000172216	2131.22	0.0523138	0.155741	0.335903	0.736944	0.937251	CEBPB
ENSG00000221869	1062.36	-0.525973	0.197797	-2.65916	0.00783369	0.137703	CEBPD
ENSG00000153879	1685.57	-0.142718	0.108177	-1.3193	0.187068	0.610139	CEBPG
ENSG00000115816	2370.31	0.215405	0.163004	1.32147	0.186344	0.608315	CEBPZ
ENSG00000218739	695.853	-0.10809	0.17297	-0.624908	0.532031	0.863419	CEBPZOS
ENSG00000237438	273.448	0.117291	0.217016	0.540471	0.588872	0.883713	CECR7
ENSG00000170835	219.315	-0.413108	0.305057	-1.3542	0.175673	0.594782	CEL
ENSG00000149187	3019.72	0.14796	0.133168	1.11108	0.266534	0.696367	CELF1
ENSG00000075275	4432.27	-0.396859	0.159485	-2.48838	0.0128328	0.180056	CELSR1
ENSG00000143126	1842.61	-0.54788	0.120454	-4.54846	5.4e-06	0.000981601	CELSR2
ENSG00000008300	1010.39	0.250477	0.144903	1.72859	0.0838831	0.452251	CELSR3
ENSG00000103888	2216.74	-0.310646	0.168803	-1.84028	0.0657268	0.408284	CEMIP
ENSG00000135048	788.225	0.463089	0.188993	2.4503	0.0142738	0.1904	CEMIP2
ENSG00000115163	366.969	0.00470327	0.274203	0.0171525	0.986315	0.997177	CENPA
ENSG00000125817	5279.28	0.0152692	0.0960334	0.158999	0.87367	0.971858	CENPB
ENSG00000177946	346.104	0.0117914	0.16943	0.0695942	0.944517	0.988595	CENPBD1
ENSG00000213753	695.873	0.0346616	0.14323	0.241999	0.808781	0.956719	CENPBD1P1
ENSG00000145241	418.22	-0.445552	0.1951	-2.28371	0.0223884	0.242741	CENPC
ENSG00000138778	1422.36	-0.0611077	0.213467	-0.286264	0.774676	0.946686	CENPE
ENSG00000117724	3876.16	-0.0908533	0.158416	-0.573511	0.566299	0.875703	CENPF
ENSG00000153044	607.079	0.0366683	0.218961	0.167465	0.867004	0.971351	CENPH
ENSG00000102384	633.319	-0.00278071	0.153182	-0.018153	0.985517	0.997177	CENPI
ENSG00000151849	764.485	0.0115588	0.132429	0.0872825	0.930447	0.984915	CENPJ
ENSG00000123219	578.583	-0.301365	0.177905	-1.69397	0.0902713	0.467231	CENPK
ENSG00000120334	361.846	-0.0168253	0.208735	-0.0806063	0.935755	0.986855	CENPL
ENSG00000100162	376.72	-0.0118369	0.351553	-0.0336704	0.97314	0.995161	CENPM
ENSG00000166451	1228.82	0.175679	0.148134	1.18594	0.235644	0.669441	CENPN
ENSG00000138092	463.41	0.243337	0.416218	0.584637	0.558792	0.873142	CENPO
ENSG00000188312	663.318	0.0155993	0.170447	0.0915202	0.927079	0.984501	CENPP
ENSG00000031691	314.583	-0.1053	0.277323	-0.379703	0.704166	0.926082	CENPQ
ENSG00000175279	292.055	-0.364544	0.302795	-1.20393	0.228617	0.662956	CENPS
ENSG00000251503	67.9867	0.48949	0.39472	1.2401	0.21494	0.64539	CENPS-CORT
ENSG00000102901	389.031	-0.155886	0.199937	-0.779672	0.435584	0.815334	CENPT
ENSG00000151725	1052.54	-0.240607	0.153814	-1.56427	0.117755	0.513494	CENPU
ENSG00000166582	292.256	0.0319981	0.199299	0.160553	0.872445	0.971858	CENPV
ENSG00000203760	1137.02	0.273295	0.158609	1.72307	0.0848754	0.455092	CENPW
ENSG00000169689	313.185	-0.0410653	0.184437	-0.222652	0.823806	0.959672	CENPX
ENSG00000116198	1016.76	0.205301	0.136151	1.5079	0.13158	0.531342	CEP104
ENSG00000168944	448.743	-0.165529	0.186481	-0.887648	0.37473	0.776814	CEP120
ENSG00000110318	276.918	-0.411078	0.26824	-1.5325	0.125398	0.523234	CEP126
ENSG00000100629	415.739	0.488651	0.159996	3.05414	0.00225704	0.0654986	CEP128
ENSG00000141577	315.302	0.141556	0.215887	0.655694	0.512021	0.854414	CEP131
ENSG00000174799	379.442	0.251569	0.162451	1.54858	0.121482	0.519363	CEP135
ENSG00000103995	743.137	0.103857	0.162614	0.638671	0.523037	0.859463	CEP152
ENSG00000135315	172.006	-0.261107	0.246047	-1.06121	0.288595	0.718041	CEP162
ENSG00000110274	882.307	0.293653	0.1698	1.72941	0.0837358	0.452251	CEP164
ENSG00000143702	805.16	0.0610956	0.189057	0.323161	0.746574	0.939036	CEP170
ENSG00000099814	2458.99	0.229442	0.115696	1.98315	0.0473509	0.349035	CEP170B
ENSG00000101639	1298.08	0.0387937	0.140992	0.275148	0.783202	0.950303	CEP192
ENSG00000126001	1114.94	0.216002	0.128259	1.68411	0.092161	0.470821	CEP250
ENSG00000198707	561.14	0.0701182	0.18902	0.370956	0.71067	0.928173	CEP290
ENSG00000166004	806.53	0.0239591	0.145325	0.164866	0.86905	0.971858	CEP295
ENSG00000135837	1289.16	0.160051	0.181686	0.88092	0.378361	0.779341	CEP350
ENSG00000106477	522.023	-0.14933	0.216865	-0.688584	0.491085	0.842801	CEP41
ENSG00000164118	294.857	-0.782643	0.271843	-2.87902	0.0039891	0.0938818	CEP44
ENSG00000138180	2779.58	0.240717	0.155963	1.54342	0.122729	0.519562	CEP55
ENSG00000166037	1254.47	0.100228	0.111224	0.901137	0.367515	0.773459	CEP57
ENSG00000183137	209.722	-0.117854	0.263291	-0.44762	0.654427	0.910428	CEP57L1
ENSG00000182923	539.296	-0.0808526	0.166536	-0.485497	0.627324	0.898524	CEP63
ENSG00000114107	518.039	-0.0895924	0.180737	-0.495706	0.620102	0.895991	CEP70
ENSG00000112877	763.331	0.16131	0.139075	1.15988	0.246097	0.678632	CEP72
ENSG00000101624	281.941	-0.0277009	0.174893	-0.158388	0.874151	0.971858	CEP76
ENSG00000148019	640.25	0.277062	0.168152	1.64768	0.0994177	0.483251	CEP78
ENSG00000173588	302.282	-0.00734344	0.208385	-0.0352398	0.971889	0.995161	CEP83
ENSG00000130695	1148.75	0.0212927	0.139774	0.152336	0.878922	0.973397	CEP85
ENSG00000121289	839.878	0.0456543	0.168306	0.271257	0.786193	0.950303	CEP89
ENSG00000258890	576.672	0.420569	0.141896	2.96393	0.0030374	0.07865	CEP95
ENSG00000182504	578.585	-0.305548	0.198072	-1.54261	0.122926	0.519565	CEP97
ENSG00000134255	990.31	-0.272474	0.225742	-1.20701	0.227427	0.661683	CEPT1
ENSG00000167123	299.545	-0.422296	0.207103	-2.03906	0.0414441	0.331936	CERCAM
ENSG00000100422	873.686	-0.0741596	0.201251	-0.368492	0.712506	0.928936	CERK
ENSG00000143418	2667.36	0.17068	0.118987	1.43445	0.151445	0.55901	CERS2
ENSG00000154227	244.991	-0.588754	0.254012	-2.31781	0.0204594	0.231606	CERS3
ENSG00000139624	545.531	-0.09897	0.249213	-0.397129	0.691272	0.924079	CERS5
ENSG00000172292	2240.41	-0.195837	0.150458	-1.3016	0.193052	0.617876	CERS6
ENSG00000172831	1143.91	-0.361341	0.216635	-1.66797	0.0953214	0.475994	CES2
ENSG00000172824	80.4946	0.343739	0.447845	0.76754	0.442761	0.819165	CES4A
ENSG00000147400	1082.47	0.261081	0.143949	1.8137	0.0697237	0.417649	CETN2
ENSG00000153140	390.318	0.0350616	0.243086	0.144235	0.885315	0.975265	CETN3
ENSG00000070761	1003.58	0.121805	0.190802	0.638382	0.523225	0.859463	CFAP20
ENSG00000159079	712.627	0.131165	0.182325	0.7194	0.471895	0.834671	CFAP298
ENSG00000137691	81.1713	0.300538	0.332063	0.905063	0.365432	0.771392	CFAP300
ENSG00000163001	321.99	0.164022	0.175016	0.937181	0.348666	0.759751	CFAP36
ENSG00000160226	93.8183	0.120068	0.259485	0.462718	0.643566	0.905639	CFAP410
ENSG00000206530	472.169	-0.0693526	0.210821	-0.328964	0.742183	0.938202	CFAP44
ENSG00000164323	1082.19	-0.0374937	0.152961	-0.24512	0.806364	0.956184	CFAP97
ENSG00000243649	820.286	0.317576	0.166506	1.9073	0.0564821	0.379961	CFB
ENSG00000197766	185.17	-0.224498	0.270012	-0.831435	0.405728	0.797631	CFD
ENSG00000153774	1486.58	0.187789	0.13635	1.37726	0.168432	0.584674	CFDP1
ENSG00000000971	5377.36	-0.879031	0.219462	-4.00539	6.19e-05	0.00585117	CFH
ENSG00000244414	46.1961	-22.8086	3.90769	-5.83685	NA	NA	CFHR1
ENSG00000205403	118.633	-0.298535	0.703424	-0.424402	0.671273	0.916475	CFI
ENSG00000172757	13488.7	0.0740585	0.176938	0.418556	0.675541	0.918217	CFL1
ENSG00000165410	446.106	0.0286805	0.294376	0.0974279	0.922387	0.983554	CFL2
ENSG00000003402	1233.5	-0.45403	0.318654	-1.42484	0.154204	0.562142	CFLAR
ENSG00000135346	230.114	0.261013	0.387854	0.672967	0.500969	0.849361	CGA
ENSG00000164430	870.855	0.028791	0.16323	0.176384	0.859993	0.969257	CGAS
ENSG00000196337	44.218	-0.397709	0.416023	-0.95598	0.339082	0.754069	CGB7
ENSG00000163320	1723.45	-0.266498	0.186284	-1.4306	0.152544	0.560115	CGGBP1
ENSG00000143375	925.947	-0.0129471	0.139106	-0.0930735	0.925845	0.984175	CGN
ENSG00000128849	275.074	0.0336467	0.250545	0.134294	0.89317	0.975416	CGNL1
ENSG00000138028	59.3259	-0.229196	0.398743	-0.574796	0.565429	0.875703	CGREF1
ENSG00000100532	198.698	-0.0715651	0.273781	-0.261395	0.793788	0.953874	CGRRF1
ENSG00000197180	22.5635	0.422715	0.562038	0.752111	0.451984	NA	CH17-340M24.3
ENSG00000128965	148.477	0.238971	0.350418	0.68196	0.495265	0.844828	CHAC1
ENSG00000143942	206.076	0.286293	0.235479	1.21579	0.224066	0.65802	CHAC2
ENSG00000167670	1709.99	-0.0393257	0.140934	-0.279036	0.780217	0.949412	CHAF1A
ENSG00000159259	533.424	0.0797449	0.141227	0.564656	0.572308	0.878311	CHAF1B
ENSG00000198824	685.167	0.726989	0.67696	1.0739	0.282866	0.711664	CHAMP1
ENSG00000172586	730.567	0.0142224	0.141859	0.100258	0.92014	0.983349	CHCHD1
ENSG00000250479	517.139	-0.245797	0.136699	-1.79809	0.0721624	0.424351	CHCHD10
ENSG00000106153	6806.84	0.0313589	0.109429	0.286568	0.774443	0.946686	CHCHD2
ENSG00000106554	640.596	0.127392	0.20586	0.618827	0.53603	0.864203	CHCHD3
ENSG00000163528	245.715	-0.038774	0.198341	-0.195492	0.845008	0.966239	CHCHD4
ENSG00000125611	172.963	0.273798	0.252148	1.08586	0.27754	0.706195	CHCHD5
ENSG00000159685	287.444	-0.095682	0.197812	-0.4837	0.628598	0.899141	CHCHD6
ENSG00000170791	1228.05	0.113341	0.110404	1.0266	0.304609	0.729969	CHCHD7
ENSG00000153922	1335.08	-0.0159477	0.14692	-0.108546	0.913562	0.982691	CHD1
ENSG00000131778	979.707	-0.0429989	0.13798	-0.311632	0.75532	0.941383	CHD1L
ENSG00000173575	3636.89	-0.15159	0.246498	-0.614975	0.538571	0.864653	CHD2
ENSG00000170004	3194.05	-0.215973	0.116202	-1.8586	0.0630834	0.398826	CHD3
ENSG00000111642	7273.73	0.375454	0.150311	2.49784	0.0124952	0.178141	CHD4
ENSG00000124177	2052.06	-0.0570973	0.124326	-0.459255	0.646051	0.906221	CHD6
ENSG00000171316	1560.55	0.30004	0.132086	2.27156	0.0231133	0.246424	CHD7
ENSG00000100888	2865.57	0.220786	0.146256	1.50959	0.131148	0.531161	CHD8
ENSG00000177200	2214.8	-0.111822	0.203291	-0.55006	0.582278	0.881578	CHD9
ENSG00000149554	1355.62	0.151411	0.133808	1.13156	0.257821	0.691707	CHEK1
ENSG00000183765	539.321	-0.300008	0.193771	-1.54826	0.12156	0.519363	CHEK2
ENSG00000085872	1136.31	0.225461	0.134582	1.67527	0.0938808	0.4745	CHERP
ENSG00000072609	735.785	-0.0405778	0.181229	-0.223904	0.822832	0.959463	CHFR
ENSG00000204116	299.748	-0.585928	0.247635	-2.36609	0.0179769	0.214165	CHIC1
ENSG00000109220	376.288	0.158925	0.191675	0.829136	0.407027	0.798621	CHIC2
ENSG00000177830	931.343	-0.00580981	0.116107	-0.0500383	0.960092	0.991068	CHID1
ENSG00000110721	930.969	0.084273	0.210633	0.400094	0.689088	0.923367	CHKA
ENSG00000100288	340.686	-0.215708	0.187151	-1.15259	0.24908	0.682096	CHKB
ENSG00000254413	41.1636	-0.65295	0.515252	-1.26724	0.205068	0.633782	CHKB-CPT1B
ENSG00000188419	1334.09	-0.196451	0.128371	-1.53034	0.125931	0.524113	CHM
ENSG00000203668	450.929	0.173259	0.179308	0.966268	0.33391	0.750015	CHML
ENSG00000131165	2625.65	0.361432	0.173568	2.08237	0.037309	0.315698	CHMP1A
ENSG00000255112	1575.88	-0.403492	0.13739	-2.93684	0.00331571	0.0831073	CHMP1B
ENSG00000130724	1497.77	0.13573	0.139591	0.972342	0.33088	0.748528	CHMP2A
ENSG00000083937	1198.76	-0.00611498	0.260517	-0.0234725	0.981273	0.996814	CHMP2B
ENSG00000115561	2306.85	-0.155214	0.137559	-1.12835	0.259172	0.692655	CHMP3
ENSG00000254505	583.475	0.327291	0.164475	1.98991	0.0466005	0.348037	CHMP4A
ENSG00000101421	6977.49	0.0380957	0.122857	0.310082	0.756499	0.941604	CHMP4B
ENSG00000164695	1012.48	-0.0615873	0.145925	-0.422048	0.67299	0.917333	CHMP4C
ENSG00000086065	3761.3	-0.195784	0.165681	-1.1817	0.237325	0.670575	CHMP5
ENSG00000176108	373.329	0.109672	0.219589	0.499441	0.617469	0.894678	CHMP6
ENSG00000147457	1085.91	0.521519	0.340297	1.53254	0.125389	0.523234	CHMP7
ENSG00000128656	45.3886	0.718324	0.415309	1.72961	0.0836997	0.452251	CHN1
ENSG00000110172	2262.86	0.0734927	0.146686	0.50102	0.616357	0.894678	CHORDC1
ENSG00000187446	2468.42	0.0688662	0.198779	0.346446	0.729008	0.935331	CHP1
ENSG00000123989	2603.4	-0.0889982	0.120303	-0.739786	0.45943	0.828179	CHPF
ENSG00000033100	2500.12	0.225779	0.264315	0.854206	0.392991	0.788325	CHPF2
ENSG00000111666	119.426	-0.0991613	0.264863	-0.374387	0.708116	0.927022	CHPT1
ENSG00000104472	459.438	0.209478	0.221925	0.943915	0.345213	0.756159	CHRAC1
ENSG00000169684	299.816	-0.0685997	0.189273	-0.362438	0.717025	0.930431	CHRNA5
ENSG00000170175	186.504	0.48759	0.239776	2.03352	0.0419996	0.333022	CHRNB1
ENSG00000115526	103.662	0.459736	0.320538	1.43426	0.151497	0.55906	CHST10
ENSG00000169105	436.966	-0.261354	0.164927	-1.58466	0.113044	0.505841	CHST14
ENSG00000182022	1291.8	0.103045	0.15327	0.672313	0.501385	0.849443	CHST15
ENSG00000147119	94.2987	-0.0924701	0.27233	-0.339552	0.734194	0.93658	CHST7
ENSG00000131873	1266.89	-0.120592	0.125752	-0.958963	0.337577	0.752541	CHSY1
ENSG00000127586	1466.18	0.0484511	0.145347	0.333348	0.738872	0.937251	CHTF18
ENSG00000168802	840.85	0.147917	0.210332	0.703255	0.481897	0.838295	CHTF8
ENSG00000160679	1359.34	-0.085152	0.17057	-0.499222	0.617623	0.894678	CHTOP
ENSG00000213341	1049.4	0.0116313	0.154875	0.0751012	0.940134	0.987801	CHUK
ENSG00000258289	620.6	0.0672527	0.15259	0.44074	0.659401	0.912203	CHURC1
ENSG00000125954	306.149	0.343299	0.369473	0.929159	0.352807	0.762351	CHURC1-FNTB
ENSG00000144021	1792.85	0.105518	0.133453	0.790674	0.429134	0.812175	CIAO1
ENSG00000166797	1610.58	0.224133	0.271527	0.825457	0.409112	0.799797	CIAO2A
ENSG00000166595	1081.09	-0.0390565	0.220516	-0.177114	0.859419	0.9692	CIAO2B
ENSG00000103245	426.724	0.0607102	0.271763	0.223394	0.823229	0.959463	CIAO3
ENSG00000005194	1348.67	0.199223	0.242652	0.821025	0.411632	0.800823	CIAPIN1
ENSG00000159208	90.0283	0.323941	0.310057	1.04478	0.296125	0.724425	CIART
ENSG00000185043	2629.81	0.112551	0.125902	0.893953	0.371347	0.77611	CIB1
ENSG00000136425	41.8631	-0.1062	0.421948	-0.251689	0.801281	0.955634	CIB2
ENSG00000079432	2225.35	-0.00796101	0.141292	-0.0563443	0.955068	0.991068	CIC
ENSG00000136305	82.5345	-0.719512	0.292717	-2.45805	0.0139695	0.188265	CIDEB
ENSG00000186162	137.221	0.249337	0.243586	1.02361	0.306019	0.730082	CIDECP1
ENSG00000100865	520.883	0.244162	0.258096	0.946011	0.344143	0.756066	CINP
ENSG00000163507	1770.24	0.228376	0.116994	1.95203	0.0509346	0.362205	CIP2A
ENSG00000198894	384.201	0.230725	1.01394	0.227554	0.819993	0.958971	CIPC
ENSG00000138433	603.948	0.0287587	0.177611	0.16192	0.871369	0.971858	CIR1
ENSG00000099622	1070.98	0.0397495	0.22553	0.176249	0.860098	0.969257	CIRBP
ENSG00000122873	835.108	-0.261168	0.140631	-1.85712	0.0632946	0.399165	CISD1
ENSG00000145354	744.359	-0.495642	0.190967	-2.59544	0.00944709	0.155212	CISD2
ENSG00000277972	670.672	0.1239	0.179877	0.688804	0.490947	0.842801	CISD3
ENSG00000114737	126.037	-0.573953	0.293774	-1.95372	0.0507343	0.361304	CISH
ENSG00000122966	1497.57	0.17376	0.116628	1.48986	0.136262	0.536689	CIT
ENSG00000164442	553.426	-0.415403	0.315511	-1.31661	0.187971	0.611885	CITED2
ENSG00000179862	1010.73	-0.135527	0.167489	-0.809169	0.418418	0.804625	CITED4
ENSG00000148337	1831.35	0.208171	0.121316	1.71594	0.0861739	0.458711	CIZ1
ENSG00000136108	2667.01	-0.0378938	0.277172	-0.136716	0.891256	0.975416	CKAP2
ENSG00000169607	1085.75	0.0589499	0.154739	0.380963	0.70323	0.926082	CKAP2L
ENSG00000136026	4145.03	-0.180463	0.117453	-1.53647	0.124424	0.521825	CKAP4
ENSG00000175216	7501.41	-0.0315731	0.116029	-0.272113	0.785535	0.950303	CKAP5
ENSG00000166165	465.399	-0.398863	0.189887	-2.10053	0.0356822	0.30966	CKB
ENSG00000217555	827.931	0.139673	0.152052	0.918585	0.358313	0.766682	CKLF
ENSG00000254788	95.6552	-0.380135	0.434821	-0.874233	0.381991	0.782139	CKLF-CMTM1
ENSG00000223572	1091.47	-0.339772	0.109325	-3.10792	0.00188412	0.0588557	CKMT1A
ENSG00000237289	1061.44	-0.335754	0.124851	-2.68924	0.00716148	0.130566	CKMT1B
ENSG00000247572	100.478	0.215559	0.288263	0.747785	0.45459	0.825676	CKMT2-AS1
ENSG00000173207	2303.33	-0.266171	0.220894	-1.20497	0.228215	0.662703	CKS1B
ENSG00000123975	3916.25	0.186463	0.204741	0.910727	0.362439	0.769199	CKS2
ENSG00000074054	1422	0.155149	0.130333	1.1904	0.233889	0.667677	CLASP1
ENSG00000163539	1377.69	-0.0268823	0.119623	-0.224726	0.822193	0.959463	CLASP2
ENSG00000104859	707.208	0.187788	0.131077	1.43265	0.151958	0.560115	CLASRP
ENSG00000140104	201.799	-0.137825	0.236315	-0.583224	0.559743	0.873421	CLBA1
ENSG00000137975	1013.57	-0.784066	0.244705	-3.20412	0.00135474	0.0468994	CLCA2
ENSG00000016602	224.68	-0.490469	0.279218	-1.75658	0.0789893	0.441722	CLCA4
ENSG00000261737	33.3895	-0.367043	0.466237	-0.787247	0.431137	0.812965	CLCA4-AS1
ENSG00000121940	599.387	0.0307242	0.178941	0.1717	0.863673	0.970573	CLCC1
ENSG00000175505	645.23	0.114966	0.153094	0.750946	0.452685	0.824914	CLCF1
ENSG00000114859	347.763	0.279629	0.184927	1.51211	0.130507	0.530735	CLCN2
ENSG00000109572	1556.64	-0.37179	0.243598	-1.52624	0.12695	0.525848	CLCN3
ENSG00000073464	214.229	-0.0216497	0.214243	-0.101052	0.919509	0.983349	CLCN4
ENSG00000171365	261.584	0.561533	0.394045	1.42505	0.154143	0.562142	CLCN5
ENSG00000011021	428.724	0.154296	0.174754	0.882935	0.377271	0.778628	CLCN6
ENSG00000103249	1237.4	0.0191031	0.176448	0.108265	0.913786	0.982715	CLCN7
ENSG00000163347	7330.59	-0.759273	0.125773	-6.03683	1.57e-09	1.22e-06	CLDN1
ENSG00000157224	1489.23	0.125339	0.140221	0.893864	0.371395	0.77611	CLDN12
ENSG00000113946	67.4375	-0.741403	0.476031	-1.55747	0.119359	0.515601	CLDN16
ENSG00000066405	304.425	0.69911	0.837547	0.834712	0.40388	0.797059	CLDN18
ENSG00000253958	281.953	-0.215708	0.224804	-0.959535	0.337289	0.752541	CLDN23
ENSG00000165215	55.8969	-0.634667	0.338592	-1.87443	0.0608717	0.394383	CLDN3
ENSG00000189143	2187.71	-0.522921	2.19881	-0.23782	NA	NA	CLDN4
ENSG00000181885	2764.61	0.0777671	0.130173	0.597414	0.550231	0.869548	CLDN7
ENSG00000213937	50.4073	0.230942	0.379106	0.609176	0.542408	0.866216	CLDN9
ENSG00000080822	1583.6	0.359322	0.226591	1.58577	0.112791	0.505692	CLDND1
ENSG00000038532	1024.9	-0.260415	0.171098	-1.52202	0.128003	0.526571	CLEC16A
ENSG00000110852	952.868	-0.576405	0.249331	-2.31181	0.0207882	0.233836	CLEC2B
ENSG00000069493	130.439	-0.149455	0.343926	-0.434557	0.663884	0.913691	CLEC2D
ENSG00000213719	8597.27	-0.0231864	0.128816	-0.179997	0.857155	0.968602	CLIC1
ENSG00000155962	145.236	-0.138855	0.254236	-0.546167	0.584951	0.882914	CLIC2
ENSG00000169583	74.296	-0.979647	0.3475	-2.81913	0.00481542	0.10419	CLIC3
ENSG00000169504	6018.75	-0.515809	0.174693	-2.95266	0.00315048	0.07996	CLIC4
ENSG00000112782	163.822	-0.648711	0.213337	-3.04079	0.00235961	0.0674117	CLIC5
ENSG00000113282	2604.62	0.0840903	0.171058	0.491588	0.623011	0.897782	CLINT1
ENSG00000130779	3624.66	0.00173213	0.108835	0.0159151	0.987302	0.997177	CLIP1
ENSG00000106665	566.974	-0.137233	0.16963	-0.809014	0.418507	0.804674	CLIP2
ENSG00000115295	1197.03	-0.314743	0.151602	-2.07612	0.0378829	0.318971	CLIP4
ENSG00000013441	1313.87	-0.186141	0.137851	-1.35031	0.176917	0.596193	CLK1
ENSG00000176444	681.115	-0.356367	0.209746	-1.69904	0.0893116	0.465127	CLK2
ENSG00000179335	1021.7	-0.0709225	0.12777	-0.55508	0.57884	0.881166	CLK3
ENSG00000113240	357.092	0.0463308	0.185056	0.250361	0.802308	0.955712	CLK4
ENSG00000165959	703.979	-0.277927	0.197536	-1.40697	0.159435	0.569812	CLMN
ENSG00000166250	566.954	0.289549	0.262021	1.10506	0.269133	0.698402	CLMP
ENSG00000188603	330.715	0.118281	0.224352	0.527212	0.598046	0.88718	CLN3
ENSG00000102805	491.122	0.0153478	0.251662	0.060986	0.95137	0.990617	CLN5
ENSG00000128973	1066.97	0.20384	0.202963	1.00432	0.315224	0.736981	CLN6
ENSG00000182372	465.079	0.149869	0.23429	0.639672	0.522386	0.859428	CLN8
ENSG00000074201	2917.96	-0.269509	0.183098	-1.47194	0.141037	0.541446	CLNS1A
ENSG00000134852	1529.86	-0.0285507	0.136399	-0.209317	0.8342	0.963912	CLOCK
ENSG00000172409	532.82	0.205144	0.238669	0.859532	0.390047	0.786442	CLP1
ENSG00000162129	831.461	0.285661	0.156355	1.827	0.0676991	0.412504	CLPB
ENSG00000125656	522.187	0.0822214	0.195343	0.420908	0.673822	0.917866	CLPP
ENSG00000204140	19.2708	-0.27982	0.556495	-0.502826	0.615086	NA	CLPSL1
ENSG00000104853	3242.59	-0.0931773	0.144801	-0.643484	0.51991	0.857947	CLPTM1
ENSG00000049656	5117.52	-0.0375555	0.127978	-0.293453	0.769176	0.945595	CLPTM1L
ENSG00000166855	1642.9	-0.102183	0.121662	-0.839896	0.400967	0.794856	CLPX
ENSG00000092853	1342.48	0.255136	0.185421	1.37598	0.168828	0.585125	CLSPN
ENSG00000171603	14009.9	-0.0175946	0.107344	-0.16391	0.869802	0.971858	CLSTN1
ENSG00000139182	742.283	-0.325304	0.218137	-1.49128	0.135888	0.536689	CLSTN3
ENSG00000122705	3434.29	0.0255365	0.200431	0.127408	0.898618	0.977911	CLTA
ENSG00000175416	1982.68	-0.269393	0.176573	-1.52567	0.127092	0.526128	CLTB
ENSG00000141367	8045.18	0.170956	0.132886	1.28649	0.198273	0.62373	CLTC
ENSG00000147003	88.1429	-0.305557	0.372012	-0.821363	0.41144	0.800823	CLTRN
ENSG00000120885	3621.45	-0.436027	0.162054	-2.69063	0.00713179	0.130186	CLU
ENSG00000103351	761.324	0.0882547	0.246075	0.35865	0.719857	0.931639	CLUAP1
ENSG00000132361	2332.88	0.287702	0.125662	2.28948	0.0220513	0.239971	CLUH
ENSG00000131797	193.311	0.1161	0.266318	0.435946	0.662876	0.913278	CLUHP3
[truncated: 10,316 more rows]

## Sheet: MIA PaCa-2
gene_id	baseMean	log2FoldChange	lfcSE	stat	pvalue	padj	symbol
ENSG00000186205	67.8184	-1.00276	0.350494	-2.86098	0.00422333	0.0338579	2023-03-01
ENSG00000099785	202.662	-0.98236	0.231248	-4.24809	2.16e-05	0.000614347	2023-03-02
ENSG00000117791	159.646	-0.545566	0.243576	-2.23982	0.0251025	0.11666	2023-03-02
ENSG00000173926	31.9311	0.35392	0.493138	0.717691	0.472948	0.719383	2023-03-03
ENSG00000198060	586.736	0.369448	0.209993	1.75934	0.0785201	0.247344	2023-03-05
ENSG00000145495	1604.65	-0.0863157	0.188537	-0.457819	0.647083	0.838542	2023-03-06
ENSG00000136536	804.339	-0.197639	0.231023	-0.855493	0.392278	0.652103	2023-03-07
ENSG00000165406	222.028	0.112895	0.209592	0.538641	0.590135	0.801705	2023-03-08
ENSG00000139266	51.2519	-0.606775	0.389325	-1.55853	0.119108	0.324857	2023-03-09
ENSG00000168385	2735.53	-0.502476	0.231705	-2.1686	0.0301134	0.13196	2023-09-02
ENSG00000100167	207.404	-0.367756	0.300042	-1.22568	0.220319	0.471569	2023-09-03
ENSG00000108387	63.7997	-1.58658	0.435676	-3.64166	0.000270882	0.00449705	2023-09-04
ENSG00000184702	304.544	-1.27304	0.2539	-5.01392	5.33e-07	2.78e-05	2023-09-05
ENSG00000125354	258.85	-0.878191	0.205714	-4.26899	1.96e-05	0.000570623	2023-09-06
ENSG00000122545	1722.33	0.309041	0.272483	1.13417	0.256725	0.518259	2023-09-07
ENSG00000164402	925.688	-0.617214	0.191663	-3.22031	0.00128054	0.0144148	2023-09-08
ENSG00000184640	1629.08	-0.696736	0.323871	-2.15128	0.0314544	0.135808	2023-09-09
ENSG00000186522	544.132	0.285498	0.242801	1.17585	0.239655	0.497577	2023-09-10
ENSG00000138758	1095.62	0.0979929	0.199886	0.490244	0.623961	0.823693	2023-09-11
ENSG00000094914	322.282	-0.380365	0.186888	-2.03526	0.0418249	0.164982	AAAS
ENSG00000081760	378.77	0.178803	0.21482	0.832339	0.405218	0.663837	AACS
ENSG00000103591	736.774	-0.150854	0.195927	-0.76995	0.441329	0.69506	AAGAB
ENSG00000115977	304.346	0.582168	0.217921	2.67146	0.00755229	0.051285	AAK1
ENSG00000087884	107.863	-0.440268	0.272142	-1.61779	0.105708	0.300819	AAMDC
ENSG00000127837	1649.6	0.288292	0.14314	2.01406	0.0440034	0.17074	AAMP
ENSG00000131043	433.694	0.0645172	0.192003	0.336021	0.736855	0.88494	AAR2
ENSG00000090861	3617.47	0.388592	0.157857	2.46167	0.0138291	0.07743	AARS
ENSG00000124608	357.215	0.169696	0.193299	0.877896	0.38	0.641643	AARS2
ENSG00000266967	349.423	-0.034775	0.209206	-0.166224	0.867981	0.945673	AARSD1
ENSG00000157426	159.306	-0.341329	0.312237	-1.09317	0.274318	0.538579	AASDH
ENSG00000149313	550.53	0.611511	0.239589	2.55233	0.0107005	0.065357	AASDHPPT
ENSG00000275700	1698.3	0.751877	0.149625	5.02509	5.03e-07	2.66e-05	AATF
ENSG00000181409	109.429	-0.795488	0.334265	-2.37981	0.0173216	0.090152	AATK
ENSG00000281376	37.5468	0.831205	0.685406	1.21272	0.225237	0.478421	ABALON
ENSG00000183044	57.1726	-1.14997	0.527465	-2.18019	0.0292432	0.129568	ABAT
ENSG00000165029	137.008	0.16595	0.360718	0.460055	0.645477	0.837747	ABCA1
ENSG00000154263	53.8756	1.40207	0.426564	3.28688	0.00101302	0.0120956	ABCA10
ENSG00000251595	27.7288	0.200667	0.616555	0.325465	0.744829	0.888753	ABCA11P
ENSG00000107331	1202.66	-1.0848	0.274186	-3.95644	7.61e-05	0.00166559	ABCA2
ENSG00000167972	514.213	-0.174256	0.211427	-0.824187	0.409833	0.668393	ABCA3
ENSG00000064687	448.109	-1.12223	0.257623	-4.35608	1.32e-05	0.000417939	ABCA7
ENSG00000135776	372.995	0.747465	0.323935	2.30746	0.0210295	0.103247	ABCB10
ENSG00000115657	150.792	-0.805001	0.33415	-2.4091	0.0159917	0.0857167	ABCB6
ENSG00000131269	404.929	0.0408575	0.168169	0.242954	0.808041	0.917059	ABCB7
ENSG00000197150	482.139	0.0981539	0.259299	0.378535	0.705033	0.869899	ABCB8
ENSG00000150967	106.762	-0.869603	0.289583	-3.00295	0.00267376	0.0243435	ABCB9
ENSG00000103222	456.666	0.430555	0.215815	1.99502	0.0460404	0.176156	ABCC1
ENSG00000124574	212.807	-0.168801	0.253001	-0.667193	0.504649	0.742757	ABCC10
ENSG00000023839	1083.39	0.149734	0.16824	0.889999	0.373466	0.636693	ABCC2
ENSG00000108846	31.6977	0.027785	0.558298	0.0497673	0.960308	0.985706	ABCC3
ENSG00000125257	334.318	0.593204	0.231691	2.56032	0.0104576	0.0643298	ABCC4
ENSG00000114770	972.099	0.138783	0.138092	1.005	0.314895	0.58202	ABCC5
ENSG00000101986	185.148	-0.627325	0.28152	-2.22835	0.0258572	0.119165	ABCD1
ENSG00000117528	740.288	0.392879	0.230203	1.70666	0.0878853	0.26672	ABCD3
ENSG00000119688	319.12	-0.595976	0.204225	-2.91824	0.00352015	0.029583	ABCD4
ENSG00000164163	1172.88	0.936156	0.247007	3.79	0.000150646	0.00283567	ABCE1
ENSG00000204574	1511.22	0.277375	0.164144	1.68982	0.0910615	0.273153	ABCF1
ENSG00000033050	1997.44	0.0690684	0.157692	0.437995	0.66139	0.846363	ABCF2
ENSG00000285292	247.802	0.975136	2.79592	0.348771	NA	NA	ABCF2
ENSG00000161204	570.191	-0.197862	0.153196	-1.29156	0.196509	0.441454	ABCF3
ENSG00000160179	109.073	-0.776547	0.405243	-1.91625	0.0553334	0.199195	ABCG1
ENSG00000144827	697.576	-0.49152	0.164173	-2.99391	0.00275424	0.024883	ABHD10
ENSG00000106077	496.534	-0.0458266	0.235887	-0.194273	0.845962	0.934825	ABHD11
ENSG00000225969	23.7115	-0.869103	0.53426	-1.62674	0.103792	0.296999	ABHD11-AS1
ENSG00000100997	607.682	-0.228593	0.182876	-1.24999	0.211303	0.460849	ABHD12
ENSG00000139826	143.68	0.618624	0.355583	1.73975	0.0819033	0.254311	ABHD13
ENSG00000248487	56.0913	-0.448156	0.418643	-1.0705	0.284396	0.550051	ABHD14A
ENSG00000114779	426.688	-0.384189	0.3818	-1.00626	0.314292	0.581332	ABHD14B
ENSG00000168792	123.486	-0.275682	0.300673	-0.916885	0.359203	0.623965	ABHD15
ENSG00000204427	429.078	-0.372834	0.223856	-1.66551	0.0958117	0.28173	ABHD16A
ENSG00000129968	940.963	-0.149129	0.176315	-0.84581	0.397659	0.657426	ABHD17A
ENSG00000107362	149.901	0.391677	0.273218	1.43357	0.151695	0.377479	ABHD17B
ENSG00000136379	66.3045	0.0974228	0.376457	0.258789	0.795798	0.911224	ABHD17C
ENSG00000164074	68.2318	-0.163764	0.476889	-0.3434	0.731298	0.882678	ABHD18
ENSG00000140526	424.278	0.272293	0.242046	1.12496	0.260605	0.522548	ABHD2
ENSG00000158201	213.799	0.159578	0.244685	0.652178	0.514287	0.750596	ABHD3
ENSG00000100439	275.115	-0.390526	0.274825	-1.421	0.155317	0.383568	ABHD4
ENSG00000011198	135.834	0.488267	0.261008	1.8707	0.0613867	0.212406	ABHD5
ENSG00000163686	60.5772	-0.408428	0.479155	-0.852391	0.393997	0.653709	ABHD6
ENSG00000127220	167.687	-0.342753	0.230038	-1.48999	0.136228	0.353718	ABHD8
ENSG00000136754	639.954	0.168802	0.1492	1.13138	0.257896	0.519308	ABI1
ENSG00000138443	879.955	0.630072	0.226869	2.77725	0.00548217	0.0410486	ABI2
ENSG00000097007	853.098	0.213065	0.173296	1.22949	0.218889	0.470123	ABL1
ENSG00000143322	505.163	0.938213	0.25724	3.64722	0.000265091	0.00442598	ABL2
ENSG00000099204	325.668	0.0597742	0.403056	0.148303	0.882104	0.952246	ABLIM1
ENSG00000163995	47.8672	-0.595705	0.449204	-1.32614	0.184795	0.42625	ABLIM2
ENSG00000159842	685.313	-0.0797373	0.191951	-0.415404	0.677846	0.854769	ABR
ENSG00000146386	136.867	0.702745	0.304034	2.31141	0.0208103	0.10239	ABRACL
ENSG00000163322	121.944	-0.127565	0.306001	-0.41688	0.676766	0.854194	ABRAXAS1
ENSG00000165660	360.885	0.751423	0.278804	2.69517	0.00703528	0.0486192	ABRAXAS2
ENSG00000146109	458.577	0.168795	0.163995	1.02927	0.303354	0.569716	ABT1
ENSG00000114626	359.352	-1.04189	0.311537	-3.34435	0.000824764	0.0105074	ABTB1
ENSG00000166016	205.968	1.94735	0.483687	4.02605	5.67e-05	0.00133578	ABTB2
ENSG00000060971	346.489	-0.616128	0.241142	-2.55505	0.0106173	0.0650088	ACAA1
ENSG00000167315	1109.53	0.040084	0.157375	0.254704	0.798952	0.913014	ACAA2
ENSG00000278540	1949.75	-0.205394	0.175406	-1.17096	0.241613	0.499986	ACACA
ENSG00000076555	86.282	-1.20204	0.423176	-2.84051	0.00450418	0.0354467	ACACB
ENSG00000111271	198.061	-0.773314	0.24825	-3.11506	0.0018391	0.0184972	ACAD10
ENSG00000240303	563.286	-0.0732053	0.23185	-0.315744	0.752197	0.892567	ACAD11
ENSG00000151498	275.553	-0.14072	0.189776	-0.741509	0.458385	0.70897	ACAD8
ENSG00000177646	839.586	-0.444425	0.174063	-2.55324	0.0106725	0.065241	ACAD9
ENSG00000117054	449.426	0.0210245	0.25758	0.0816233	0.934946	0.975317	ACADM
ENSG00000122971	126.24	-0.752288	0.306652	-2.45323	0.0141581	0.0788948	ACADS
ENSG00000196177	269.916	-0.319351	0.410331	-0.778277	0.436406	0.691088	ACADSB
ENSG00000072778	2261.84	-0.0544024	0.146685	-0.370878	0.710728	0.872278	ACADVL
ENSG00000072818	14.2939	-1.52037	0.751479	-2.02317	0.0430552	0.168212	ACAP1
ENSG00000114331	630.342	0.572688	0.248882	2.30104	0.0213893	0.104355	ACAP2
ENSG00000131584	248.533	-0.515073	0.202783	-2.54002	0.0110846	0.0666933	ACAP3
ENSG00000075239	1710.84	-0.469389	0.17485	-2.68452	0.00726334	0.0497262	ACAT1
ENSG00000120437	930.535	-0.594933	0.145712	-4.08292	4.45e-05	0.00109048	ACAT2
ENSG00000182827	559.817	0.499296	0.230324	2.16779	0.0301744	0.132161	ACBD3
ENSG00000181513	84.5048	-0.731166	0.392335	-1.86363	0.0623739	0.214935	ACBD4
ENSG00000107897	463.388	0.552298	0.211191	2.61516	0.00891849	0.0577092	ACBD5
ENSG00000230124	716.502	-0.0625771	0.158243	-0.395448	0.692512	0.862929	ACBD6
ENSG00000176244	139.035	-0.188032	0.27326	-0.688106	0.491386	0.73374	ACBD7
ENSG00000110455	37.288	-1.42669	0.598224	-2.38487	0.0170852	0.0892644	ACCS
ENSG00000102977	285.38	0.110743	0.26921	0.411363	0.680806	0.855986	ACD
ENSG00000159640	213.996	-1.749	0.301034	-5.80999	6.25e-09	6.14e-07	ACE
ENSG00000078124	250.923	1.27915	0.306262	4.17666	2.96e-05	0.000790444	ACER3
ENSG00000087085	64.168	1.64481	0.409421	4.01741	5.88e-05	0.00136837	ACHE
ENSG00000100813	1879.18	-0.0233738	0.15674	-0.149124	0.881455	0.951896	ACIN1
ENSG00000144476	87.9108	-0.807383	0.496311	-1.62677	0.103787	0.296999	ACKR3
ENSG00000131473	4372.26	-0.0692556	0.173008	-0.400303	0.688933	0.860871	ACLY
ENSG00000122729	407.857	-0.0447135	0.186575	-0.239655	0.810598	0.917889	ACO1
ENSG00000100412	1559.86	-0.315767	0.200277	-1.57665	0.114877	0.317206	ACO2
ENSG00000184227	101.68	-0.747354	0.308283	-2.42424	0.0153403	0.0834462	ACOT1
ENSG00000112304	611.641	-0.697953	0.212352	-3.28678	0.00101341	0.0120956	ACOT13
ENSG00000119673	167.441	-0.619373	0.311483	-1.98846	0.0467603	0.178082	ACOT2
ENSG00000097021	2460.11	-0.0424626	0.22801	-0.186231	0.852263	0.937855	ACOT7
ENSG00000101473	249.624	-0.457723	0.309281	-1.47996	0.138885	0.358025	ACOT8
ENSG00000123130	1126.02	0.285193	0.147342	1.93558	0.0529191	0.193465	ACOT9
ENSG00000161533	330.613	0.27108	0.198903	1.36288	0.172921	0.410264	ACOX1
ENSG00000168306	71.5115	0.843389	0.397208	2.12329	0.0337293	0.142239	ACOX2
ENSG00000087008	118.485	-0.537174	0.332644	-1.61486	0.10634	0.302275	ACOX3
ENSG00000143727	738.03	0.423167	0.305706	1.38423	0.166289	0.400813	ACP1
ENSG00000134575	151.926	-0.37533	0.267604	-1.40256	0.160749	0.392628	ACP2
ENSG00000162836	221.946	-0.709971	0.244189	-2.90746	0.00364373	0.030303	ACP6
ENSG00000167107	415.714	-1.8468	0.285631	-6.4657	1.01e-10	1.61e-08	ACSF2
ENSG00000176715	332.558	-0.699895	0.186286	-3.7571	0.000171897	0.00314079	ACSF3
ENSG00000151726	500.735	0.529012	0.218062	2.42597	0.0152677	0.0831059	ACSL1
ENSG00000123983	944.549	0.479574	0.226556	2.1168	0.0342769	0.143721	ACSL3
ENSG00000068366	706.813	0.519821	0.195156	2.66362	0.00773046	0.0521524	ACSL4
ENSG00000154930	139.551	-0.558863	0.298487	-1.87232	0.0611621	0.212047	ACSS1
ENSG00000131069	394.203	-0.341792	0.244535	-1.39772	0.162196	0.394243	ACSS2
ENSG00000107796	102.548	-0.91333	0.343205	-2.66118	0.00778676	0.0523259	ACTA2
ENSG00000075624	31338.1	-0.356798	0.157731	-2.26207	0.0236931	0.112066	ACTB
ENSG00000184009	16425.4	-0.105301	0.26735	-0.39387	0.693677	0.863453	ACTG1
ENSG00000136518	1302.15	0.460566	0.167002	2.75785	0.00581835	0.0428539	ACTL6A
ENSG00000072110	2790.22	0.156659	0.205734	0.761463	0.446381	0.699886	ACTN1
ENSG00000130402	4341.64	0.411637	0.187065	2.2005	0.0277713	0.125192	ACTN4
ENSG00000131966	341.147	0.158088	0.266561	0.593063	0.553139	0.777617	ACTR10
ENSG00000138107	1114.66	0.0611193	0.256535	0.238249	0.811688	0.918057	ACTR1A
ENSG00000115073	497.393	-0.168753	0.220207	-0.766336	0.443476	0.696699	ACTR1B
ENSG00000138071	2768.2	0.447716	0.212254	2.10934	0.0349152	0.145417	ACTR2
ENSG00000115091	2433.96	0.286748	0.130933	2.19004	0.0285216	0.127528	ACTR3
ENSG00000133627	248.185	-0.0128496	0.207718	-0.0618612	0.950673	0.981221	ACTR3B
ENSG00000101442	183.859	0.122711	0.223383	0.549331	0.582779	0.796436	ACTR5
ENSG00000075089	276.472	0.194644	0.247801	0.785487	0.432168	0.686955	ACTR6
ENSG00000113812	278.876	0.249234	0.239799	1.03935	0.298643	0.565415	ACTR8
ENSG00000184378	37.7042	-0.388351	0.480415	-0.808365	0.418881	0.675876	ACTRT3
ENSG00000115170	153.922	0.918934	0.256652	3.58047	0.000342983	0.00541291	ACVR1
ENSG00000135503	236.116	0.0627083	0.26831	0.233716	0.815205	0.919964	ACVR1B
ENSG00000243989	375.086	-0.772161	0.222657	-3.46794	0.000524469	0.00752096	ACY1
ENSG00000119640	156.331	0.180731	0.36114	0.500446	0.616761	0.818664	ACYP1
ENSG00000170634	86.6433	0.466174	0.317391	1.46877	0.141897	0.362863	ACYP2
ENSG00000196839	311.58	-0.877521	0.30033	-2.92186	0.00347949	0.0292834	ADA
ENSG00000168803	74.1653	0.331516	0.33448	0.99114	0.321617	0.589109	ADAL
ENSG00000137845	1380.26	-0.155652	0.192755	-0.807512	0.419372	0.676296	ADAM10
ENSG00000073670	179.843	-0.672594	0.334921	-2.00822	0.0446204	0.172298	ADAM11
ENSG00000143537	1000.18	-0.218403	0.149689	-1.45904	0.144555	0.366991	ADAM15
ENSG00000151694	477.824	0.310678	0.212822	1.4598	0.144345	0.366778	ADAM17
ENSG00000008277	245.916	-0.67242	0.236897	-2.83845	0.00453335	0.0356125	ADAM22
ENSG00000151651	80.4449	-0.718069	0.29993	-2.39413	0.01666	0.0880109	ADAM8
ENSG00000168615	1768.35	0.919537	0.225791	4.07251	4.65e-05	0.00113093	ADAM9
ENSG00000142303	61.2815	-1.39107	0.44629	-3.11697	0.0018272	0.0184358	ADAMTS10
ENSG00000145536	42.694	3.59525	0.851824	4.22065	2.44e-05	0.000674446	ADAMTS16
ENSG00000158859	111.128	2.45336	0.4709	5.20994	1.89e-07	1.16e-05	ADAMTS4
ENSG00000136378	105.796	-1.38847	0.373931	-3.71318	0.000204671	0.00364571	ADAMTS7
ENSG00000143382	235.149	-0.346273	0.247721	-1.39784	0.162162	0.394243	ADAMTSL4
ENSG00000185761	140.491	-0.290572	0.333727	-0.870689	0.383924	0.644985	ADAMTSL5
ENSG00000105963	106.654	0.1719	0.324229	0.530183	0.595985	0.805943	ADAP1
ENSG00000184060	31.7464	-0.747135	0.52172	-1.43206	0.152126	0.378119	ADAP2
ENSG00000160710	2501.55	-0.415143	0.139216	-2.982	0.00286368	0.0257	ADAR
ENSG00000197381	724.132	0.263713	0.198783	1.32664	0.184628	0.425932	ADARB1
ENSG00000065457	199.202	0.129219	0.227413	0.568213	0.569891	0.788007	ADAT1
ENSG00000189007	181.04	0.767443	0.293684	2.61316	0.00897084	0.0579399	ADAT2
ENSG00000213638	52.8729	0.506419	0.379927	1.33294	0.182553	0.423468	ADAT3
ENSG00000063761	91.7873	0.356657	0.308232	1.1571	0.247229	0.507004	ADCK1
ENSG00000133597	362.693	-0.13757	0.179725	-0.765448	0.444005	0.697342	ADCK2
ENSG00000173137	98.1481	-0.286207	0.334363	-0.855975	0.392011	0.651845	ADCK5
ENSG00000138031	751.421	-0.253266	0.180657	-1.40191	0.160941	0.392823	ADCY3
ENSG00000173175	51.7396	-0.367161	0.452427	-0.811537	0.417057	0.674295	ADCY5
ENSG00000174233	346.831	-0.783338	0.24607	-3.18339	0.0014556	0.0157482	ADCY6
ENSG00000121281	479.466	-0.0609369	0.213037	-0.286039	0.774848	0.901384	ADCY7
ENSG00000162104	221.287	-0.19086	0.260947	-0.731413	0.464527	0.713261	ADCY9
ENSG00000087274	1138.55	-0.126454	0.141869	-0.891342	0.372746	0.636432	ADD1
ENSG00000075340	253.906	0.425516	0.242888	1.7519	0.0797909	0.249432	ADD2
ENSG00000148700	80.7075	-0.405593	0.39943	-1.01543	0.309901	0.576425	ADD3
ENSG00000020181	86.525	-0.935246	0.391337	-2.38987	0.0168543	0.0885729	ADGRA2
ENSG00000152990	461.249	0.041285	0.185201	0.22292	0.823598	0.923979	ADGRA3
ENSG00000181790	156.054	-0.508588	0.352312	-1.44357	0.148859	0.373231	ADGRB1
ENSG00000121753	193.156	-2.02397	0.348438	-5.80869	6.3e-09	6.15e-07	ADGRB2
ENSG00000127507	62.5618	1.36813	0.415621	3.29176	0.000995614	0.0119798	ADGRE2
ENSG00000123146	1168.56	0.0352033	0.181743	0.193699	0.846412	0.935191	ADGRE5
ENSG00000205336	303.81	1.10834	0.341203	3.24832	0.00116088	0.0134824	ADGRG1
ENSG00000112414	2042.09	-0.606851	0.191777	-3.16436	0.00155426	0.0164116	ADGRG6
ENSG00000072071	584.34	-0.239097	0.168441	-1.41947	0.155761	0.384073	ADGRL1
ENSG00000197894	1317.9	-0.0126683	0.163274	-0.0775892	0.938155	0.976883	ADH5
ENSG00000182551	2653.45	0.136491	0.211422	0.645588	0.518546	0.753674	ADI1
ENSG00000159346	1346.72	0.214799	0.15321	1.40199	0.160917	0.392823	ADIPOR1
ENSG00000006831	1751.49	0.278563	0.176661	1.57682	0.114837	0.317194	ADIPOR2
ENSG00000148671	1764.78	-0.835454	0.279631	-2.9877	0.00281086	0.0253035	ADIRF
ENSG00000156110	630.899	0.48136	0.188687	2.55111	0.0107381	0.0654743	ADK
ENSG00000148926	43.0572	1.65916	0.621949	2.66768	0.0076377	0.0516853	ADM
ENSG00000224420	42.6856	1.05916	0.876456	1.20846	0.226871	0.479978	ADM5
ENSG00000101126	802.572	-0.238094	0.150318	-1.58394	0.113208	0.313943	ADNP
ENSG00000101544	376.28	0.183891	0.436827	0.420969	0.673778	0.852329	ADNP2
ENSG00000181915	364.307	0.391791	0.232875	1.68241	0.0924887	0.275507	ADO
ENSG00000163485	145.08	-0.447062	0.361194	-1.23774	0.215814	0.466877	ADORA1
ENSG00000170425	342.788	0.35868	0.20853	1.72004	0.085425	0.262013	ADORA2B
ENSG00000159322	374.266	-0.237592	0.242399	-0.980171	0.327001	0.594275	ADPGK
ENSG00000153531	70.1894	0.00339282	0.315372	0.0107582	0.991416	0.997664	ADPRHL1
ENSG00000116863	281.792	0.189227	0.217174	0.871315	0.383582	0.644768	ADPRHL2
ENSG00000170222	133.024	0.451693	0.266974	1.6919	0.0906653	0.27243	ADPRM
ENSG00000184160	153.691	0.474503	0.256496	1.84994	0.0643215	0.219241	ADRA2C
ENSG00000169252	74.1559	1.12305	0.46672	2.40626	0.0161167	0.0861239	ADRB2
ENSG00000130706	1941.22	0.417926	0.1688	2.47586	0.0132915	0.0753068	ADRM1
ENSG00000239900	1224.81	-0.0933665	0.174205	-0.535957	0.591988	0.803005	ADSL
ENSG00000035687	770.597	0.351502	0.234896	1.49642	0.134544	0.351214	ADSS
ENSG00000185100	56.4887	-0.766435	0.428836	-1.78725	0.0738977	0.238035	ADSSL1
ENSG00000111863	114.046	0.590658	0.332535	1.77623	0.0756955	0.241657	ADTRP
ENSG00000139154	467.65	0.283859	0.192131	1.47742	0.139562	0.358929	AEBP2
ENSG00000181026	533.161	1.00029	0.180729	5.53477	3.12e-08	2.42e-06	AEN
ENSG00000104964	3342.24	-0.928704	0.217615	-4.26765	1.98e-05	0.000573099	AES
ENSG00000196526	831.896	0.639712	0.66029	0.968835	0.332628	0.600527	AFAP1
ENSG00000157510	165.122	0.505384	0.237217	2.13047	0.0331328	0.140765	AFAP1L1
ENSG00000130396	636.812	0.492361	0.193759	2.5411	0.0110504	0.0666005	AFDN
ENSG00000172493	240.563	0.0176625	0.273996	0.0644627	0.948602	0.980503	AFF1
ENSG00000144218	89.3913	1.93149	1.20617	1.60135	0.1093	0.307212	AFF3
ENSG00000072364	1606.73	0.838028	0.229383	3.6534	0.000258793	0.00433753	AFF4
ENSG00000135537	83.8297	-0.146997	0.334547	-0.439392	0.660378	0.845847	AFG1L
ENSG00000223959	208.903	-0.852449	0.251317	-3.39193	0.00069403	0.00932856	AFG3L1P
ENSG00000141385	1460.05	0.336511	0.183835	1.83051	0.0671742	0.224894	AFG3L2
ENSG00000183077	154.354	-0.192675	0.293247	-0.657039	0.511156	0.748382	AFMID
ENSG00000119844	321.745	0.145086	0.204126	0.710765	0.47723	0.722482	AFTPH
ENSG00000038002	75.6767	0.043696	0.391779	0.111532	0.911194	0.965067	AGA
ENSG00000157985	331.939	0.758918	0.239052	3.1747	0.00149991	0.0160596	AGAP1
ENSG00000265018	55.3319	0.07574	0.382879	0.197817	0.843188	0.933885	AGAP12P
ENSG00000255737	134.71	0.0517565	0.316507	0.163524	0.870106	0.946319	AGAP2-AS1
ENSG00000133612	929.573	-0.529745	0.194436	-2.72451	0.00643963	0.0457805	AGAP3
ENSG00000188234	140.098	-0.653027	0.311088	-2.09917	0.035802	0.147963	AGAP4
ENSG00000172650	64.0489	0.586628	0.691183	0.84873	0.396032	0.6558	AGAP5
ENSG00000204149	191.698	1.21754	1.52637	0.797669	0.425062	0.680727	AGAP6
ENSG00000204172	117.562	-0.0881005	0.269047	-0.327454	0.743325	0.888052	AGAP9
ENSG00000084693	546.564	-0.412306	0.175948	-2.34334	0.0191121	0.0969476	AGBL5
ENSG00000204305	45.9714	-0.424701	0.392064	-1.08324	0.2787	0.543218	AGER
ENSG00000173744	463.455	0.696415	0.226726	3.07162	0.00212899	0.0206785	AGFG1
ENSG00000106351	68.0172	-0.437892	0.351704	-1.24506	0.21311	0.463125	AGFG2
ENSG00000164252	920.43	-0.0820487	0.184883	-0.443788	0.657196	0.844433	AGGF1
ENSG00000006530	407.195	-0.14832	0.170631	-0.869242	0.384715	0.645696	AGK
ENSG00000162688	199.282	0.0324011	0.309471	0.104698	0.916615	0.967008	AGL
ENSG00000092847	361.835	0.103077	0.435676	0.23659	0.812975	0.918745	AGO1
ENSG00000123908	1106.66	0.832818	0.203484	4.0928	4.26e-05	0.00105238	AGO2
ENSG00000126070	196.993	0.731077	0.312405	2.34016	0.0192755	0.0974638	AGO3
ENSG00000134698	257.868	0.262111	0.22726	1.15335	0.248765	0.508749	AGO4
ENSG00000204310	1424.1	0.0370188	0.176121	0.21019	0.833519	0.928972	AGPAT1
ENSG00000169692	645.554	-0.364076	0.228833	-1.59101	0.111607	0.311029	AGPAT2
ENSG00000160216	726.552	0.252617	0.335392	0.7532	0.451329	0.703849	AGPAT3
ENSG00000026652	88.4647	-0.0773124	0.310574	-0.248934	0.803412	0.915102	AGPAT4
ENSG00000155189	686.166	0.598318	0.229033	2.61237	0.00899181	0.0580341	AGPAT5
ENSG00000018510	879.165	0.55466	0.217488	2.5503	0.0107629	0.0655429	AGPS
ENSG00000188157	1102.28	-0.806142	0.269898	-2.98684	0.00281873	0.0253356	AGRN
ENSG00000135049	394.324	0.496892	0.19727	2.51884	0.0117742	0.0691159	AGTPBP1
ENSG00000177674	409.208	-0.570449	0.189268	-3.01397	0.00257853	0.023772	AGTRAP
ENSG00000153207	1701.02	0.47676	0.214937	2.21814	0.0265452	0.12137	AHCTF1
ENSG00000226121	417.174	0.734955	0.246872	2.97707	0.00291014	0.0259843	AHCTF1P1
ENSG00000101444	8636.79	-0.354972	0.167546	-2.11865	0.0341197	0.143256	AHCY
ENSG00000168710	1423.56	-0.613611	0.203718	-3.01206	0.00259479	0.0238717	AHCYL1
ENSG00000158467	199.452	0.103985	0.287126	0.362157	0.717234	0.875251	AHCYL2
ENSG00000126705	152.976	-0.115588	0.309784	-0.373125	0.709056	0.871804	AHDC1
ENSG00000135541	351.964	0.169417	0.249746	0.678358	0.497545	0.737895	AHI1
ENSG00000124942	4802.78	0.240089	1.13497	0.211539	0.832467	0.928677	AHNAK
ENSG00000185567	1396.97	-0.0551102	0.231767	-0.237783	0.81205	0.918228	AHNAK2
ENSG00000106546	60.14	1.88177	0.473972	3.97022	7.18e-05	0.00158597	AHR
ENSG00000063438	24.7365	-0.266813	0.564815	-0.47239	0.636648	0.832664	AHRR
ENSG00000100591	3039.52	0.415411	0.184874	2.24699	0.0246407	0.115154	AHSA1
ENSG00000173209	323.087	-1.10298	0.37121	-2.97131	0.00296528	0.0262804	AHSA2P
ENSG00000186063	1390.38	0.395896	0.196728	2.01241	0.0441773	0.171113	AIDA
ENSG00000126878	152.882	-0.973956	0.559502	-1.74076	0.0817263	0.253964	AIF1L
ENSG00000156709	1464.65	-0.404031	0.13583	-2.97454	0.00293426	0.0261201	AIFM1
ENSG00000042286	481.11	0.593798	0.168115	3.5321	0.000412278	0.00623237	AIFM2
ENSG00000146416	198.41	-0.35125	0.219444	-1.60063	0.109459	0.307313	AIG1
ENSG00000164022	779.807	0.245233	0.177284	1.38327	0.166581	0.401297	AIMP1
ENSG00000106305	428.779	0.241019	0.227376	1.06	0.289143	0.556285	AIMP2
ENSG00000110711	608.405	-0.857088	0.265938	-3.22289	0.00126906	0.0143519	AIP
ENSG00000232434	124.569	-0.600312	0.248312	-2.41757	0.0156245	0.0844431	AJM1
ENSG00000129474	183.39	0.091903	0.238216	0.385796	0.699648	0.866536	AJUBA
ENSG00000106992	374.221	-0.831074	0.285867	-2.90721	0.00364672	0.0303135	AK1
ENSG00000004455	2285.25	0.329273	0.186267	1.76775	0.0771026	0.244506	AK2
ENSG00000147853	347.174	0.206061	0.227226	0.906853	0.364484	0.628439	AK3
ENSG00000162433	492.208	0.497253	0.240261	2.06964	0.038486	0.1553	AK4
ENSG00000154027	442.152	1.45134	0.20191	7.18808	6.57e-13	1.71e-10	AK5
ENSG00000085231	818.828	0.784172	0.174463	4.49478	6.96e-06	0.000244871	AK6
ENSG00000121057	908.708	-0.122719	0.179008	-0.685553	0.492995	0.735038	AKAP1
ENSG00000108599	400.752	0.0623118	0.198792	0.313452	0.753937	0.892874	AKAP10
ENSG00000023516	487.34	0.250408	0.238841	1.04843	0.294441	0.561347	AKAP11
ENSG00000131016	1404.86	0.0517087	0.198422	0.260599	0.794402	0.91049	AKAP12
ENSG00000170776	480.381	0.953475	0.197532	4.82694	1.39e-06	6.22e-05	AKAP13
ENSG00000197976	924.454	0.217791	0.142904	1.52404	0.127498	0.339441	AKAP17A
ENSG00000118507	41.6192	0.7582	0.482645	1.57093	0.1162	0.319586	AKAP7
ENSG00000105127	490.881	0.121976	0.166832	0.731132	0.464698	0.713276	AKAP8
ENSG00000011243	758.226	0.216707	0.191967	1.12887	0.258951	0.520359	AKAP8L
ENSG00000127914	444.33	0.458242	0.291119	1.57407	0.115471	0.318196	AKAP9
ENSG00000166452	194.085	-0.676792	0.279798	-2.41886	0.0155694	0.084301	AKIP1
ENSG00000174574	1030.09	0.496673	0.191982	2.58708	0.00967937	0.060776	AKIRIN1
ENSG00000135334	399.963	0.88038	0.182196	4.83204	1.35e-06	6.09e-05	AKIRIN2
ENSG00000106948	80.4336	1.27505	0.380067	3.35481	0.000794181	0.010199	AKNA
ENSG00000162641	19.3206	0.856203	0.822738	1.04067	0.298027	0.564948	AKNAD1
ENSG00000117448	608.291	-0.358547	0.252527	-1.41984	0.155655	0.383964	AKR1A1
ENSG00000085662	671.863	-0.329999	0.261558	-1.26167	0.207069	0.456141	AKR1B1
ENSG00000187134	1982.69	1.7355	0.188507	9.20659	3.37e-20	3.48e-17	AKR1C1
ENSG00000151632	224.065	1.291	0.23206	5.56322	2.65e-08	2.1e-06	AKR1C2
ENSG00000196139	71.7831	0.63553	0.375254	1.6936	0.0903418	0.271643	AKR1C3
ENSG00000165568	152.199	0.0102159	0.319539	0.0319706	0.974495	0.990631	AKR1E2
ENSG00000053371	619.531	-0.627797	0.190605	-3.29372	0.000988722	0.0119349	AKR7A2
ENSG00000142208	1957.12	-0.109773	0.289231	-0.379535	0.704291	0.869751	AKT1
ENSG00000204673	838.324	-0.0181494	0.175167	-0.103612	0.917477	0.967269	AKT1S1
ENSG00000105221	1477.94	-0.568081	0.170139	-3.33893	0.000841027	0.010647	AKT2
ENSG00000117020	219.557	0.135262	0.317418	0.426133	0.670011	0.851027	AKT3
ENSG00000166971	222.985	-0.0918295	0.300167	-0.305928	0.75966	0.89502	AKTIP
ENSG00000148218	263.917	-0.387447	0.231409	-1.6743	0.0940724	0.278526	ALAD
ENSG00000023330	677.364	0.266419	0.181802	1.46544	0.142802	0.364357	ALAS1
ENSG00000161618	348.335	-0.214335	0.187182	-1.14507	0.252181	0.512614	ALDH16A1
ENSG00000059573	1425.75	0.0284811	0.160193	0.177792	0.858886	0.940932	ALDH18A1
ENSG00000165092	9241.61	-1.15342	0.149912	-7.694	1.43e-14	4.82e-12	ALDH1A1
ENSG00000184254	2118.45	0.762158	0.176321	4.32256	1.54e-05	0.000470772	ALDH1A3
ENSG00000137124	451.843	-0.158126	0.158254	-0.999188	0.317703	0.585111	ALDH1B1
ENSG00000108602	19.168	-1.35903	0.75373	-1.80307	0.0713778	0.233229	ALDH3A1
ENSG00000072210	929.184	-0.792401	0.24315	-3.25889	0.00111849	0.0130658	ALDH3A2
ENSG00000006534	113.007	-1.08894	0.288066	-3.78017	0.000156724	0.00292192	ALDH3B1
ENSG00000159423	603.26	-0.877752	0.22421	-3.91487	9.05e-05	0.00191363	ALDH4A1
ENSG00000112294	195.522	-1.40031	0.251169	-5.57515	2.47e-08	1.98e-06	ALDH5A1
ENSG00000119711	200.718	-0.500803	0.307262	-1.62989	0.103125	0.295766	ALDH6A1
ENSG00000164904	3173.02	-1.21852	0.140346	-8.68225	3.88e-18	2.62e-15	ALDH7A1
ENSG00000143149	1014.09	-0.09707	0.171931	-0.564586	0.572355	0.789551	ALDH9A1
ENSG00000285043	357.859	-0.0582509	1.33293	-0.0437014	0.965142	0.986923	ALDOA
ENSG00000149925	6716.72	-0.450402	0.236368	-1.90551	0.0567139	0.202239	ALDOA
ENSG00000109107	159.292	-1.69003	0.3536	-4.77951	1.76e-06	7.67e-05	ALDOC
ENSG00000033011	196.79	0.322147	0.285938	1.12663	0.259899	0.521667	ALG1
ENSG00000139133	52.8385	0.713791	0.681231	1.04779	0.294733	0.561702	ALG10
ENSG00000253710	152.248	0.784913	0.602376	1.30303	0.192565	0.437005	ALG11
ENSG00000182858	157.015	-0.874756	0.31922	-2.74029	0.00613846	0.0444187	ALG12
ENSG00000101901	256.653	0.113099	0.248597	0.454951	0.649145	0.83953	ALG13
ENSG00000172339	103.24	-0.214179	0.317573	-0.674425	0.500041	0.740002	ALG14
ENSG00000119523	457.972	0.405751	0.222467	1.82387	0.0681721	0.22648	ALG2
ENSG00000214160	502.347	0.284785	0.173916	1.63749	0.101528	0.292657	ALG3
ENSG00000120697	297.456	-0.0588528	0.283515	-0.207583	0.835555	0.930152	ALG5
ENSG00000088035	148.979	0.0805816	0.340185	0.236876	0.812753	0.918671	ALG6
ENSG00000159063	326.199	-0.0222176	0.226115	-0.098258	0.921727	0.969266	ALG8
ENSG00000086848	95.422	0.362674	0.293737	1.23469	0.216945	0.468203	ALG9
ENSG00000100601	183.149	0.110561	0.262216	0.421642	0.673286	0.852199	ALKBH1
ENSG00000189046	119.46	-0.105482	0.298395	-0.353498	0.723715	0.879059	ALKBH2
ENSG00000166199	170.763	-0.143026	0.232846	-0.614251	0.539049	0.768434	ALKBH3
ENSG00000160993	126.583	-0.285004	0.250584	-1.13736	0.255388	0.516948	ALKBH4
ENSG00000091542	632.658	0.39765	0.188383	2.11086	0.0347843	0.145218	ALKBH5
ENSG00000239382	207.064	-0.754421	0.242675	-3.10878	0.00187864	0.0188195	ALKBH6
ENSG00000125652	199.572	-0.144269	0.239625	-0.602062	0.547133	0.774052	ALKBH7
ENSG00000137760	105.672	1.32146	0.353998	3.73294	0.000189255	0.00341612	ALKBH8
ENSG00000116127	401.328	0.697018	0.253375	2.75093	0.00594257	0.0434232	ALMS1
ENSG00000230002	32.1346	0.575925	0.568062	1.01384	0.310658	0.577223	ALMS1-IT1
ENSG00000215067	54.4686	-0.666676	0.452804	-1.47233	0.140932	0.361026	ALOX12-AS1
ENSG00000179148	71.5409	5.31763	0.67087	7.92647	2.25e-15	9.44e-13	ALOXE3
ENSG00000073331	78.3083	-0.524897	0.327093	-1.60473	0.108553	0.305979	ALPK1
ENSG00000003393	619.943	0.389959	0.158017	2.46782	0.0135938	0.0764289	ALS2
ENSG00000178038	42.948	-0.304235	0.479446	-0.634556	0.525718	0.759275	ALS2CL
ENSG00000183684	1404.69	0.222639	0.193893	1.14826	0.250862	0.511232	ALYREF
ENSG00000242110	128.569	-0.345548	0.259964	-1.32921	0.183777	0.424906	AMACR
ENSG00000110497	478.944	0.202342	0.235727	0.858372	0.390687	0.6512	AMBRA1
ENSG00000123505	1288.3	1.07866	0.235567	4.579	4.67e-06	0.000173653	AMD1
ENSG00000162066	261.739	-0.441779	0.227215	-1.94432	0.0518564	0.190695	AMDHD2
ENSG00000184675	183.764	-0.0966249	0.226593	-0.426426	0.669798	0.850915	AMER1
ENSG00000159461	761.733	0.44544	0.228273	1.95134	0.0510162	0.188561	AMFR
ENSG00000104899	104.63	-0.0460779	0.322346	-0.142946	0.886333	0.953882	AMH
ENSG00000181754	67.3245	-0.0379974	0.325654	-0.11668	0.907114	0.962925	AMIGO1
ENSG00000176020	35.2366	0.200797	0.645122	0.311254	0.755607	0.893244	AMIGO3
ENSG00000101935	260.724	0.574103	0.271891	2.11152	0.034728	0.145093	AMMECR1
ENSG00000144233	518.714	0.346353	0.183481	1.88768	0.0590693	0.207273	AMMECR1L
ENSG00000151743	66.9368	0.0338101	0.354177	0.0954611	0.923949	0.970593	AMN1
ENSG00000166025	216.521	0.330083	0.267271	1.23501	0.216826	0.468133	AMOTL1
ENSG00000114019	733.343	0.343165	0.264801	1.29594	0.194997	0.439913	AMOTL2
ENSG00000116337	660.015	-0.609884	0.22602	-2.69836	0.00696812	0.0482879	AMPD2
ENSG00000133805	114.9	1.58787	0.347885	4.56436	5.01e-06	0.000184665	AMPD3
ENSG00000145020	43.8697	-1.43891	0.491436	-2.92797	0.00341184	0.0288876	AMT
ENSG00000196704	662.137	0.0620366	0.200877	0.308829	0.757452	0.893764	AMZ2
ENSG00000214174	49.0175	0.683362	0.568383	1.20229	0.22925	0.483347	AMZ2P1
ENSG00000153107	1155.89	0.315726	0.207069	1.52474	0.127324	0.339421	ANAPC1
ENSG00000164162	136.664	0.426832	0.243383	1.75375	0.0794738	0.248794	ANAPC10
ENSG00000141552	688.809	-0.291447	0.337672	-0.863105	0.388079	0.648596	ANAPC11
ENSG00000129055	419.45	-0.171159	0.208774	-0.819827	0.412315	0.67045	ANAPC13
ENSG00000110200	318.956	-0.486429	0.300639	-1.61798	0.105667	0.300749	ANAPC15
ENSG00000166295	607.743	-0.0938038	0.212473	-0.441487	0.658861	0.845129	ANAPC16
ENSG00000233673	40.374	0.738216	0.830562	0.888815	0.374102	0.63713	ANAPC1P1
ENSG00000176248	512.354	-0.334883	0.172487	-1.9415	0.0521979	0.191585	ANAPC2
ENSG00000053900	259.963	0.382733	0.224151	1.70748	0.087733	0.266534	ANAPC4
ENSG00000089053	1465.51	-0.183365	0.129216	-1.41906	0.155881	0.38426	ANAPC5
ENSG00000196510	626.211	-0.0539501	0.159556	-0.338127	0.735268	0.884373	ANAPC7
ENSG00000214274	37.029	-0.865988	0.67305	-1.28666	0.198212	0.443242	ANG
ENSG00000013523	320.72	-0.203761	0.253141	-0.804928	0.420861	0.677505	ANGEL1
ENSG00000174606	356.72	0.211729	0.224082	0.944873	0.344724	0.611934	ANGEL2
ENSG00000167772	146.041	0.630203	0.359176	1.75458	0.0793315	0.248526	ANGPTL4
ENSG00000029534	1223.33	-1.35469	0.160979	-8.41533	3.92e-17	2.15e-14	ANK1
ENSG00000145362	157.051	0.0830288	0.256966	0.323113	0.74661	0.889908	ANK2
ENSG00000151150	204.265	-1.47933	0.253226	-5.84194	5.16e-09	5.21e-07	ANK3
ENSG00000166839	82.9594	-0.428197	0.363892	-1.17671	0.239309	0.497301	ANKDD1A
ENSG00000185722	904.271	-0.145616	0.187679	-0.775877	0.437821	0.69202	ANKFY1
ENSG00000154122	100.22	0.690062	0.283595	2.43327	0.0149633	0.0818767	ANKH
ENSG00000131503	1207.02	-0.112043	0.21325	-0.525406	0.599301	0.807689	ANKHD1
ENSG00000254996	1230.78	-0.0479166	0.195872	-0.244632	0.806742	0.916532	ANKHD1-EIF4EBP3
ENSG00000001629	878.013	0.148531	0.175874	0.844527	0.398375	0.658069	ANKIB1
ENSG00000176915	613.589	0.0177474	0.166938	0.106311	0.915336	0.966457	ANKLE2
ENSG00000144504	194.83	-0.522834	0.226624	-2.30706	0.0210517	0.103325	ANKMY1
ENSG00000106524	154.167	-0.382673	0.300949	-1.27155	0.203532	0.451121	ANKMY2
ENSG00000164331	180.872	-0.451753	0.294915	-1.53181	0.12557	0.336319	ANKRA2
ENSG00000088448	362.475	-0.00650678	0.203688	-0.0319448	0.974516	0.990631	ANKRD10
ENSG00000167522	1505.54	0.621304	0.157353	3.94848	7.86e-05	0.00171126	ANKRD11
ENSG00000101745	407.928	0.595275	0.262463	2.26803	0.0233272	0.110662	ANKRD12
ENSG00000076513	231.548	0.963828	0.23652	4.07504	4.6e-05	0.00112027	ANKRD13A
ENSG00000198720	324.863	-0.33013	0.221322	-1.49163	0.135796	0.353275	ANKRD13B
ENSG00000118454	284.592	0.624375	0.290236	2.15127	0.031455	0.135808	ANKRD13C
ENSG00000172932	270.184	-0.373521	0.276732	-1.34976	0.177093	0.415875	ANKRD13D
ENSG00000134461	119.712	-0.107027	0.269005	-0.397863	0.690731	0.861988	ANKRD16
ENSG00000132466	1391.42	0.239901	0.169818	1.4127	0.157745	0.387356	ANKRD17
ENSG00000163126	22.1562	-0.126216	0.6548	-0.192756	0.84715	0.935491	ANKRD23
ENSG00000107890	218.999	0.333882	0.268104	1.24534	0.213006	0.463072	ANKRD26
ENSG00000105186	1089.58	-0.151891	0.15001	-1.01253	0.311283	0.577833	ANKRD27
ENSG00000206560	728.718	-0.0223804	0.152113	-0.14713	0.883029	0.952642	ANKRD28
ENSG00000164236	364.914	0.553212	0.230327	2.40186	0.0163121	0.0867989	ANKRD33B
ENSG00000272031	69.7099	0.0845214	0.452645	0.186728	0.851874	0.937691	ANKRD34A
ENSG00000135976	136.532	-0.0888029	0.289306	-0.306952	0.75888	0.894767	ANKRD36
ENSG00000196912	89.0486	-0.0799565	0.379033	-0.210948	0.832928	0.928806	ANKRD36B
ENSG00000174501	76.4284	0.756078	0.427368	1.76915	0.0768689	0.243985	ANKRD36C
ENSG00000186352	24.317	-0.431733	0.691406	-0.624428	0.532346	0.763625	ANKRD37
ENSG00000213337	207.14	-0.305713	0.223782	-1.36612	0.171903	0.408522	ANKRD39
ENSG00000154945	561.197	0.419207	0.194988	2.14992	0.0315618	0.136138	ANKRD40
ENSG00000137494	75.5995	-0.488263	0.320172	-1.525	0.127258	0.339297	ANKRD42
ENSG00000186106	70.8208	0.170051	0.331411	0.513113	0.607872	0.812607	ANKRD46
ENSG00000168876	95.1611	-0.0239653	0.364401	-0.0657663	0.947564	0.980352	ANKRD49
ENSG00000151458	1623.2	0.296372	0.202649	1.46249	0.143607	0.365747	ANKRD50
ENSG00000139645	921.818	0.0983958	0.193402	0.508762	0.610919	0.814543	ANKRD52
ENSG00000100124	272.665	-0.310987	0.211589	-1.46977	0.141624	0.362325	ANKRD54
ENSG00000135299	50.9866	0.310555	0.498484	0.622999	0.533285	0.764567	ANKRD6
ENSG00000156381	365.662	-0.319634	0.218055	-1.46584	0.142693	0.364263	ANKRD9
ENSG00000064999	384.47	0.336028	0.211938	1.5855	0.112853	0.313489	ANKS1A
ENSG00000168096	118.658	-0.201229	0.354818	-0.567133	0.570624	0.788566	ANKS3
ENSG00000165138	416.108	0.0676811	0.274924	0.246181	0.805542	0.916235	ANKS6
ENSG00000163516	402.962	-0.371635	0.188959	-1.96675	0.0492123	0.184086	ANKZF1
ENSG00000011426	2412.92	0.751437	0.247125	3.04072	0.00236013	0.0223142	ANLN
ENSG00000160746	171.044	-0.466266	0.294919	-1.58099	0.113879	0.315289	ANO10
ENSG00000177119	619.659	0.330734	0.18671	1.77138	0.0764983	0.243207	ANO6
ENSG00000074855	170.381	-0.99136	0.308049	-3.21819	0.00129001	0.0144886	ANO8
ENSG00000140350	1635.3	0.00405459	0.180294	0.0224887	0.982058	0.994446	ANP32A
ENSG00000259516	14.2222	-0.562127	0.787979	-0.713379	0.475611	0.721332	ANP32AP1
ENSG00000136938	5477.32	0.14382	0.184964	0.777555	0.436832	0.691326	ANP32B
ENSG00000143401	1458.83	0.647537	0.239945	2.69869	0.00696134	0.048279	ANP32E
ENSG00000169604	426.822	0.271843	0.20326	1.33741	0.181088	0.421347	ANTXR1
ENSG00000163297	1017.72	0.686923	0.169767	4.04626	5.2e-05	0.00124338	ANTXR2
ENSG00000135046	13659.5	0.92357	0.174064	5.30592	1.12e-07	7.47e-06	ANXA1
ENSG00000122359	1394.06	-0.912957	0.182019	-5.01572	5.28e-07	2.76e-05	ANXA11
ENSG00000182718	12837.6	0.52532	0.155936	3.36881	0.000754931	0.00985334	ANXA2
ENSG00000231991	1514.12	0.673629	0.192081	3.507	0.000453195	0.0067124	ANXA2P2
ENSG00000196975	718.863	0.0630386	0.189381	0.332866	0.739235	0.886341	ANXA4
ENSG00000164111	1340.88	1.09149	0.167329	6.52301	6.89e-11	1.2e-08	ANXA5
ENSG00000197043	3248.78	-1.12599	0.202663	-5.55598	2.76e-08	2.18e-06	ANXA6
ENSG00000138279	1187.33	0.0758624	0.134866	0.562501	0.573775	0.790411	ANXA7
ENSG00000143412	39.137	-1.95403	0.592991	-3.29521	0.000983478	0.0118917	ANXA9
ENSG00000131480	48.775	1.88597	0.474245	3.97679	6.99e-05	0.00155756	AOC2
ENSG00000138660	210.541	0.805913	0.269362	2.99193	0.00277217	0.0250321	AP1AR
ENSG00000100280	1175.21	-0.144093	0.188007	-0.766425	0.443423	0.696678	AP1B1
ENSG00000166747	1118.05	0.17493	0.221144	0.791023	0.428931	0.684242	AP1G1
ENSG00000213983	426.128	-0.695102	0.25908	-2.68296	0.00729731	0.0499393	AP1G2
ENSG00000072958	941.834	0.0604331	0.195585	0.308987	0.757332	0.893764	AP1M1
ENSG00000106367	1588.14	-0.135249	0.139087	-0.972401	0.330851	0.598549	AP1S1
ENSG00000182287	193.341	1.01766	0.32539	3.1275	0.00176299	0.0180519	AP1S2
ENSG00000196961	1463.01	-0.520883	0.161919	-3.21694	0.00129564	0.0145365	AP2A1
ENSG00000183020	1113.16	-0.64708	0.178293	-3.62931	0.000284177	0.00468678	AP2A2
ENSG00000006125	4947.94	0.15013	0.217016	0.691795	0.489066	0.731681	AP2B1
ENSG00000161203	2740.04	-0.183431	0.181991	-1.00791	0.313497	0.58035	AP2M1
ENSG00000042753	1461.31	-0.407355	0.155955	-2.612	0.00900133	0.0580742	AP2S1
ENSG00000132842	1221.88	-0.0035024	0.203766	-0.0171883	0.986286	0.995859	AP3B1
ENSG00000065000	2970.68	0.268468	0.186859	1.43674	0.150791	0.376098	AP3D1
ENSG00000185009	819.975	-0.0226637	0.217042	-0.104421	0.916835	0.967056	AP3M1
ENSG00000070718	271.053	-0.33811	0.260757	-1.29665	0.194751	0.439732	AP3M2
ENSG00000177879	718.52	0.22868	0.244767	0.934275	0.350162	0.615754	AP3S1
ENSG00000157823	439.19	-0.608428	0.366199	-1.66147	0.0966193	0.283016	AP3S2
ENSG00000134262	152.234	0.593895	0.274369	2.16459	0.0304194	0.132739	AP4B1
ENSG00000081014	163.87	0.483532	0.35338	1.3683	0.171217	0.407716	AP4E1
ENSG00000221838	180.144	-0.366373	0.303839	-1.20581	0.22789	0.481321	AP4M1
ENSG00000100478	58.0721	0.83247	0.585947	1.42073	0.155397	0.383613	AP4S1
ENSG00000254470	336.876	0.172531	0.190452	0.905902	0.364988	0.628733	AP5B1
ENSG00000053770	226.961	0.149345	0.306769	0.48683	0.626379	0.825308	AP5M1
ENSG00000125843	63.2699	-0.659419	0.348575	-1.89176	0.0585236	0.20611	AP5S1
ENSG00000242802	349.387	0.191404	0.221543	0.863959	0.387611	0.648514	AP5Z1
ENSG00000120868	115.109	0.182485	0.394971	0.462023	0.644065	0.836827	APAF1
ENSG00000034053	214.36	0.107559	0.217411	0.494726	0.620793	0.821547	APBA2
ENSG00000011132	291.229	-0.0743095	0.263893	-0.281589	0.778258	0.902841	APBA3
ENSG00000166313	362.531	-0.409923	0.207157	-1.97881	0.0478376	0.180634	APBB1
ENSG00000163697	137.586	-0.0205725	0.270726	-0.0759901	0.939427	0.977455	APBB2
ENSG00000113108	219.903	-0.925171	0.243688	-3.79654	0.00014673	0.00277981	APBB3
ENSG00000134982	230.999	0.00923128	0.449732	0.0205262	0.983624	0.995171	APC
ENSG00000115266	90.084	-0.199645	0.354712	-0.562836	0.573546	0.79032	APC2
ENSG00000164062	1003.01	-0.808255	0.175084	-4.61637	3.91e-06	0.000149389	APEH
ENSG00000100823	716.593	0.0239857	0.263648	0.0909764	0.927511	0.972307	APEX1
ENSG00000169188	668.669	-0.23993	0.152336	-1.575	0.115256	0.317902	APEX2
ENSG00000117362	1734.04	-0.547477	0.140172	-3.90576	9.39e-05	0.0019605	APH1A
ENSG00000138613	46.9066	0.0761604	0.425155	0.179136	0.857831	0.940336	APH1B
ENSG00000166181	757.036	0.508562	0.231754	2.1944	0.0282065	0.126602	API5
ENSG00000149089	597.563	-0.613525	0.196595	-3.12076	0.00180386	0.0182683	APIP
ENSG00000105290	149.899	-0.760687	0.318182	-2.39073	0.0168148	0.0884566	APLP1
ENSG00000084234	4076.79	-0.461036	0.12619	-3.6535	0.000258685	0.00433753	APLP2
ENSG00000101474	1655.47	0.0923006	0.12618	0.731499	0.464474	0.713261	APMAP
ENSG00000128383	31.601	-0.307652	0.500641	-0.614517	0.538874	0.768434	APOBEC3A
ENSG00000179750	554.131	-0.0556507	0.200441	-0.277641	0.781288	0.904418	APOBEC3B
ENSG00000244509	759.204	-1.02122	0.179323	-5.69488	1.23e-08	1.1e-06	APOBEC3C
ENSG00000243811	40.1951	-0.937333	0.432542	-2.16704	0.0302321	0.132265	APOBEC3D
ENSG00000128394	78.2866	-0.98531	0.428713	-2.2983	0.021545	0.104752	APOBEC3F
ENSG00000239713	79.9973	-2.27312	0.434556	-5.23091	1.69e-07	1.06e-05	APOBEC3G
ENSG00000130208	62.6003	-0.509724	0.367951	-1.3853	0.16596	0.400294	APOC1
ENSG00000130203	17.2766	0.91091	0.680925	1.33775	0.180976	0.4212	APOE
ENSG00000100342	37.778	-2.18872	0.550395	-3.97663	6.99e-05	0.00155756	APOL1
ENSG00000128335	221.896	-0.313531	0.214135	-1.46418	0.143145	0.364941	APOL2
ENSG00000178878	228.731	2.79625	0.464001	6.02639	1.68e-09	1.99e-07	APOLD1
ENSG00000204444	11.5166	-0.185911	0.827929	-0.22455	0.82233	0.923364	APOM
ENSG00000184831	273.096	-0.129553	0.189234	-0.684619	0.493585	0.735621	APOO
ENSG00000155008	332.558	0.440797	0.256535	1.71827	0.0857469	0.262708	APOOL
ENSG00000256053	195.883	0.187731	0.229369	0.818467	0.413091	0.671153	APOPT1
ENSG00000142192	9751.38	0.132999	0.151453	0.878157	0.379859	0.641527	APP
ENSG00000062725	344.75	0.183652	0.243624	0.753834	0.450949	0.70366	APPBP2
ENSG00000157500	507.479	0.442201	0.261251	1.69263	0.0905257	0.272103	APPL1
ENSG00000136044	197.196	-0.295588	0.211267	-1.39912	0.161777	0.393807	APPL2
ENSG00000198931	715.087	-0.145073	0.186052	-0.779747	0.43554	0.690213	APRT
ENSG00000214293	95.9738	0.288109	0.350052	0.823046	0.410482	0.668761	APTR
ENSG00000137074	272.623	0.321298	0.210309	1.52775	0.126576	0.337991	APTX
ENSG00000021776	729.895	0.101406	0.229661	0.441545	0.658819	0.845129	AQR
ENSG00000078061	567.856	-0.498163	0.166703	-2.98833	0.00280508	0.0252774	ARAF
ENSG00000186635	303.178	-0.504667	0.231349	-2.18141	0.029153	0.129429	ARAP1
ENSG00000120318	108.604	0.0998691	0.268434	0.372043	0.709861	0.872	ARAP3
ENSG00000198576	36.5631	2.13194	0.589907	3.61402	0.000301485	0.00487809	ARC
ENSG00000095139	1172.83	0.464364	0.244725	1.8975	0.0577622	0.204371	ARCN1
ENSG00000109321	1826.13	-0.251465	0.152684	-1.64697	0.0995648	0.289083	AREG
ENSG00000119682	660.843	0.0329442	0.20258	0.162623	0.870815	0.94651	AREL1
ENSG00000143761	5320.82	0.20563	0.147056	1.39831	0.16202	0.394035	ARF1
ENSG00000134287	1271.46	-0.485612	0.169598	-2.86331	0.00419234	0.0336901	ARF3
ENSG00000168374	1089.3	0.262227	0.179669	1.4595	0.144428	0.366882	ARF4
ENSG00000272146	14.1945	0.55411	0.892428	0.620902	0.534664	0.765472	ARF4-AS1
ENSG00000004059	1111.52	-0.285131	0.162074	-1.75927	0.0785322	0.247344	ARF5
ENSG00000165527	1695.32	0.320514	0.204779	1.56517	0.117543	0.321743	ARF6
ENSG00000101199	678.046	-0.295318	0.369657	-0.798897	0.42435	0.680082	ARFGAP1
ENSG00000149182	426.458	-0.113651	0.167064	-0.680286	0.496324	0.737094	ARFGAP2
ENSG00000242247	284.884	-0.158941	0.204577	-0.776924	0.437204	0.691541	ARFGAP3
ENSG00000066777	459.132	0.424099	0.190812	2.2226	0.0262425	0.120326	ARFGEF1
ENSG00000124198	884.884	0.511035	0.227633	2.24499	0.0247688	0.115537	ARFGEF2
ENSG00000164144	145.9	0.493303	0.379939	1.29838	0.194158	0.439374	ARFIP1
ENSG00000132254	449.82	-0.509936	0.192726	-2.64591	0.00814709	0.0540709	ARFIP2
ENSG00000101246	412.026	-0.818251	0.271311	-3.01591	0.00256207	0.0236699	ARFRP1
ENSG00000081181	146.628	0.723443	0.34892	2.07338	0.0381371	0.154512	ARG2
ENSG00000134884	1123.18	-0.680801	0.211742	-3.21523	0.00130339	0.014572	ARGLU1
ENSG00000175220	262.847	0.187003	0.244978	0.763345	0.445258	0.698623	ARHGAP1
ENSG00000071205	92.1942	1.1443	0.302823	3.77876	0.000157611	0.00293223	ARHGAP10
ENSG00000198826	423.69	1.43346	0.308725	4.64318	3.43e-06	0.000135855	ARHGAP11A
ENSG00000285077	128.769	-0.0623096	0.264302	-0.235752	0.813625	0.919121	ARHGAP11B
ENSG00000165322	873.169	-0.197787	0.26423	-0.74854	0.454134	0.705811	ARHGAP12
ENSG00000140750	301.915	0.131705	0.20149	0.653656	0.513333	0.749785	ARHGAP17
ENSG00000146376	128.538	-0.453875	0.293092	-1.54857	0.121484	0.329445	ARHGAP18
ENSG00000213390	224.139	0.42689	0.302187	1.41267	0.157754	0.387356	ARHGAP19
ENSG00000107863	887.104	-0.00571095	0.166935	-0.0342106	0.972709	0.989979	ARHGAP21
ENSG00000275832	65.824	-0.0814133	0.433333	-0.187877	0.850973	0.936992	ARHGAP23
ENSG00000145819	70.7275	1.42312	0.346856	4.1029	4.08e-05	0.00101889	ARHGAP26
ENSG00000159314	338.993	-0.441908	0.201774	-2.19012	0.0285158	0.127528	ARHGAP27
ENSG00000215769	172.738	-0.397367	0.253016	-1.57052	0.116293	0.319711	ARHGAP27P1
ENSG00000137962	598.338	0.658236	0.287863	2.28663	0.0222172	0.106955	ARHGAP29
ENSG00000134909	185.379	0.102337	0.279647	0.36595	0.714402	0.873793	ARHGAP32
ENSG00000004777	69.4796	-0.66101	0.402442	-1.6425	0.100487	0.290767	ARHGAP33
ENSG00000160007	1191.23	0.282624	0.256652	1.10119	0.270813	0.534601	ARHGAP35
ENSG00000147799	151.834	-0.341262	0.243608	-1.40087	0.161253	0.393084	ARHGAP39
ENSG00000006740	104.181	-0.224242	0.306576	-0.73144	0.46451	0.713261	ARHGAP44
ENSG00000180448	113.617	-0.192532	0.338492	-0.568793	0.569497	0.787938	ARHGAP45
ENSG00000100852	1117.45	0.363254	0.200173	1.8147	0.0695697	0.229586	ARHGAP5
ENSG00000258655	263.626	-0.0895353	0.237739	-0.376612	0.706462	0.870835	ARHGAP5-AS1
ENSG00000141522	2032.13	0.53074	0.133649	3.97114	7.15e-05	0.00158185	ARHGDIA
ENSG00000242173	129.809	-0.305326	0.266606	-1.14523	0.252113	0.512534	ARHGDIG
ENSG00000076928	401.378	-0.0401799	0.181236	-0.221699	0.824548	0.924396	ARHGEF1
ENSG00000074964	164.883	-0.0726449	0.312983	-0.232105	0.816456	0.920478	ARHGEF10L
ENSG00000132694	548.143	-0.161116	0.199272	-0.808525	0.418788	0.675876	ARHGEF11
ENSG00000196914	948.802	0.525891	0.211604	2.48526	0.0129455	0.073723	ARHGEF12
ENSG00000130762	76.7819	-1.04241	0.370794	-2.81129	0.00493431	0.0379484	ARHGEF16
ENSG00000110237	243	-0.664563	0.238042	-2.79179	0.0052417	0.0397046	ARHGEF17
ENSG00000104880	416.717	0.149407	0.187663	0.796146	0.425947	0.681423	ARHGEF18
ENSG00000142632	416.855	-0.0643113	0.180471	-0.356352	0.721577	0.877809	ARHGEF19
ENSG00000116584	1232.49	1.04281	0.172631	6.04069	1.53e-09	1.85e-07	ARHGEF2
ENSG00000240771	162.263	-0.967332	0.267784	-3.61236	0.000303419	0.00489845	ARHGEF25
ENSG00000114790	151.988	-0.217328	0.27553	-0.788762	0.430251	0.68518	ARHGEF26
ENSG00000214944	314.572	0.494871	0.262761	1.88335	0.0596531	0.208543	ARHGEF28
ENSG00000163947	185.102	0.0204699	0.222099	0.0921654	0.926567	0.971669	ARHGEF3
ENSG00000137135	110.713	-0.398133	0.301433	-1.3208	0.186567	0.428483	ARHGEF39
ENSG00000136002	178.451	-0.762372	0.230413	-3.30872	0.000937246	0.0114667	ARHGEF4
ENSG00000165801	187.267	-0.529753	0.29373	-1.80354	0.0713034	0.233136	ARHGEF40
ENSG00000102606	498.707	0.196382	0.179658	1.09309	0.274356	0.538579	ARHGEF7
ENSG00000131089	202.218	-0.552387	0.263895	-2.09321	0.0363306	0.14955	ARHGEF9
ENSG00000117713	450.588	0.169424	0.24833	0.682253	0.495079	0.736144	ARID1A
ENSG00000189079	269.742	0.0296547	0.246179	0.12046	0.904119	0.961109	ARID2
ENSG00000116017	341.286	0.0971901	0.213856	0.454465	0.649494	0.8398	ARID3A
ENSG00000179361	146.228	0.399222	0.263073	1.51753	0.129132	0.341991	ARID3B
ENSG00000032219	338.925	0.318232	0.253476	1.25547	0.209307	0.458602	ARID4A
ENSG00000054267	545.795	-0.0194452	0.194355	-0.10005	0.920305	0.968532	ARID4B
ENSG00000196843	71.301	0.170842	0.431398	0.39602	0.69209	0.862748	ARID5A
ENSG00000166233	367.853	0.111162	0.199338	0.557657	0.577078	0.792874	ARIH1
ENSG00000177479	1063.31	0.356113	0.182499	1.95131	0.0510202	0.188561	ARIH2
ENSG00000120805	487.711	-0.226693	0.191617	-1.18305	0.236787	0.493827	ARL1
ENSG00000169379	156.513	0.547319	0.283265	1.93218	0.0533375	0.194392	ARL13B
ENSG00000152219	206.134	0.274483	0.248164	1.10606	0.268702	0.532339	ARL14EP
ENSG00000185305	62.4525	-0.864307	0.498559	-1.73361	0.0829872	0.25664	ARL15
ENSG00000214087	110.165	0.224313	0.318714	0.703805	0.481554	0.725965	ARL16
ENSG00000185829	122.77	-0.0423603	0.251384	-0.168508	0.866183	0.945172	ARL17A
ENSG00000228696	22.6236	0.0339974	0.952806	0.0356814	0.971536	0.98972	ARL17A
ENSG00000213465	386.676	-0.419923	0.206716	-2.0314	0.0422147	0.166035	ARL2
ENSG00000102931	357.441	-0.343712	0.262313	-1.31031	0.190089	0.433655	ARL2BP
ENSG00000273003	111.161	-1.1091	3.30792	-0.335287	0.737409	0.885061	ARL2-SNX15
ENSG00000138175	404.778	-0.34207	0.188265	-1.81696	0.069224	0.228807	ARL3
ENSG00000122644	171.514	0.503015	0.268405	1.87409	0.0609177	0.211408	ARL4A
ENSG00000188042	2558.8	-0.0316516	0.139326	-0.227177	0.820286	0.922563	ARL4C
ENSG00000175906	69.7638	-0.127669	0.323627	-0.394494	0.693216	0.863255	ARL4D
ENSG00000162980	468.807	0.899446	0.266122	3.37983	0.000725315	0.00959725	ARL5A
ENSG00000165997	346.823	0.974766	0.329197	2.96104	0.003066	0.0268175	ARL5B
ENSG00000113966	42.0738	0.256998	0.444405	0.578296	0.563064	0.784168	ARL6
ENSG00000170540	1700.06	0.0552856	0.218514	0.253007	0.800263	0.913337	ARL6IP1
ENSG00000182196	586.419	-0.240331	0.274709	-0.874859	0.381651	0.643408	ARL6IP4
ENSG00000144746	542.548	-0.37875	0.17342	-2.184	0.0289621	0.128874	ARL6IP5
ENSG00000177917	315.115	-0.135137	0.194698	-0.694085	0.487629	0.73055	ARL6IP6
ENSG00000143862	435.31	-0.176641	0.185047	-0.954575	0.339793	0.606858	ARL8A
ENSG00000134108	475.736	1.28212	0.468234	2.73821	0.00617747	0.0446204	ARL8B
ENSG00000104442	420.334	0.527146	0.311017	1.69491	0.090093	0.271237	ARMC1
ENSG00000170632	613.285	-0.0288165	0.164183	-0.175515	0.860675	0.941844	ARMC10
ENSG00000140691	92.8125	0.134163	0.480744	0.279074	0.780188	0.903695	ARMC5
ENSG00000105676	490.565	-0.0908412	0.200555	-0.452949	0.650585	0.840329	ARMC6
ENSG00000125449	123.698	-0.723179	0.434691	-1.66366	0.0961795	0.282292	ARMC7
ENSG00000114098	366.372	0.254414	0.229964	1.10632	0.268587	0.532339	ARMC8
ENSG00000135931	337.431	-0.180195	0.174953	-1.02996	0.303027	0.569679	ARMC9
ENSG00000184867	208.337	-0.0350232	0.32278	-0.108505	0.913595	0.965997	ARMCX2
ENSG00000102401	461.416	-0.175723	0.311289	-0.5645	0.572414	0.789551	ARMCX3
ENSG00000125962	146.966	-0.0352823	0.452741	-0.0779305	0.937883	0.976716	ARMCX5
ENSG00000198960	159.799	-0.490423	0.299236	-1.63892	0.101231	0.29204	ARMCX6
ENSG00000120029	289.274	0.0486546	0.210406	0.231241	0.817127	0.920645	ARMH3
ENSG00000146476	280.321	0.288781	0.299064	0.965616	0.334236	0.601516	ARMT1
ENSG00000143437	567.765	-0.000952299	0.177469	-0.00536599	0.995719	0.999084	ARNT
ENSG00000133794	175.475	0.700153	0.251727	2.7814	0.00541258	0.0406495	ARNTL
ENSG00000029153	79.1975	2.06723	0.514552	4.01753	5.88e-05	0.00136837	ARNTL2
ENSG00000241685	3117.31	0.198942	0.180927	1.09957	0.271521	0.535572	ARPC1A
ENSG00000130429	2843.04	-0.536218	0.202293	-2.65071	0.00803236	0.0534508	ARPC1B
ENSG00000163466	3598.01	0.00705028	0.149444	0.0471767	0.962372	0.986048	ARPC2
ENSG00000111229	1799.28	-0.263331	0.193621	-1.36004	0.173818	0.411739	ARPC3
ENSG00000241553	1002.79	0.147749	0.163569	0.903281	0.366377	0.630138	ARPC4
ENSG00000250151	30.7523	-0.892171	0.585349	-1.52417	0.127466	0.339441	ARPC4-TTLL3
ENSG00000162704	1035.5	0.298448	0.242733	1.22953	0.218872	0.470123	ARPC5
ENSG00000136950	909.934	0.592719	0.175166	3.38375	0.000715026	0.00953985	ARPC5L
ENSG00000242498	149.979	-0.555663	0.287317	-1.93397	0.0531169	0.193905	ARPIN
ENSG00000128989	613.305	0.611886	0.335399	1.82435	0.0680993	0.226367	ARPP19
ENSG00000137486	195.483	-0.167328	0.316625	-0.528474	0.59717	0.806434	ARRB1
ENSG00000141480	674.755	-0.0785225	0.19555	-0.401548	0.688017	0.860379	ARRB2
ENSG00000197070	385.542	-0.492582	0.178912	-2.7532	0.00590151	0.0432491	ARRDC1
ENSG00000203993	165.897	0.316633	0.326136	0.970861	0.331618	0.599442	ARRDC1-AS1
ENSG00000105643	338.376	-0.0103423	0.19347	-0.0534565	0.957368	0.984353	ARRDC2
ENSG00000113369	707.099	1.51762	0.181644	8.35489	6.55e-17	3.29e-14	ARRDC3
ENSG00000100299	122.128	-0.0898878	0.31286	-0.28731	0.773875	0.900668	ARSA
ENSG00000113273	106.619	0.353141	0.388535	0.908905	0.3634	0.628013	ARSB
ENSG00000006756	236.331	-0.337642	0.232997	-1.44913	0.147302	0.371074	ARSD
ENSG00000164291	169.901	-0.101596	0.225041	-0.451458	0.65166	0.84093	ARSK
ENSG00000173409	391.444	-0.161886	0.1997	-0.810648	0.417568	0.67463	ARV1
ENSG00000099889	117.256	0.00267335	0.335669	0.00796424	0.993646	0.998452	ARVCF
ENSG00000214435	235.899	-0.674506	0.230033	-2.93222	0.00336551	0.0286117	AS3MT
ENSG00000104763	163.375	-0.350831	0.281148	-1.24785	0.212085	0.461815	ASAH1
ENSG00000204147	52.6864	0.680043	0.504263	1.34859	0.17747	0.416275	ASAH2B
ENSG00000153317	885.285	0.567441	0.228723	2.48091	0.0131049	0.0744593	ASAP1
ENSG00000151693	970.252	0.982887	0.24463	4.01785	5.87e-05	0.00136837	ASAP2
ENSG00000088280	102.464	-1.24614	0.370496	-3.36344	0.000769762	0.0099791	ASAP3
ENSG00000065802	257.081	0.473715	0.530853	0.892365	0.372197	0.635891	ASB1
ENSG00000196372	319.792	-0.40294	0.268741	-1.49936	0.13378	0.349633	ASB13
ENSG00000267080	68.592	-0.0822462	0.446533	-0.184188	0.853866	0.938218	ASB16-AS1
ENSG00000115239	298.863	-0.213295	0.180779	-1.17986	0.238054	0.495411	ASB3
ENSG00000148331	362.102	0.907333	0.36858	2.4617	0.013828	0.07743	ASB6
ENSG00000183475	161.199	0.127648	0.250339	0.509903	0.610119	0.813909	ASB7
ENSG00000177981	135.176	-0.433536	0.293277	-1.47825	0.139341	0.358571	ASB8
ENSG00000102048	131.452	-1.17463	0.322814	-3.63873	0.000273991	0.00454436	ASB9
ENSG00000138303	191.6	-0.0608424	0.211458	-0.287728	0.773555	0.90054	ASCC1
ENSG00000100325	587.375	0.0941759	0.273418	0.34444	0.730516	0.882512	ASCC2
ENSG00000112249	870.849	0.611211	0.20653	2.95943	0.0030821	0.0269182	ASCC3
ENSG00000111875	277.337	0.265112	0.286433	0.925566	0.354671	0.620075	ASF1A
ENSG00000105011	653.808	-0.44465	0.161243	-2.75764	0.00582197	0.0428626	ASF1B
ENSG00000116539	1029.36	0.321356	0.179578	1.7895	0.0735339	0.237418	ASH1L
ENSG00000235919	49.1389	0.753485	0.384128	1.96154	0.0498155	0.185369	ASH1L-AS1
ENSG00000129691	349.229	-0.183422	0.236867	-0.774367	0.438714	0.692683	ASH2L
ENSG00000110881	168.19	-0.489049	0.292208	-1.67363	0.0942026	0.278771	ASIC1
ENSG00000213199	61.8914	-0.0306068	0.392307	-0.0780174	0.937814	0.976715	ASIC3
ENSG00000126522	502.153	-0.295983	0.16004	-1.84943	0.0643951	0.219241	ASL
ENSG00000169093	1079.33	-0.749478	0.160866	-4.65901	3.18e-06	0.000127242	ASMTL
ENSG00000198356	1698.86	-0.368627	0.160645	-2.29467	0.0217523	0.105439	ASNA1
ENSG00000070669	872.439	0.818338	0.19126	4.27866	1.88e-05	0.000551865	ASNS
ENSG00000138381	570.709	1.12692	0.354953	3.17483	0.00149924	0.0160596	ASNSD1
ENSG00000198363	875.662	0.141827	0.147153	0.963806	0.335143	0.60247	ASPH
ENSG00000174939	387.157	-0.401256	0.230946	-1.73745	0.0823081	0.255258	ASPHD1
ENSG00000066279	1636.86	0.722632	0.28904	2.50011	0.0124154	0.0718249	ASPM
ENSG00000169696	211.445	-0.327556	0.217407	-1.50665	0.1319	0.347095	ASPSCR1
ENSG00000162174	81.9528	0.200216	0.351886	0.568981	0.569369	0.787938	ASRGL1
ENSG00000130707	554.104	-0.95871	0.276523	-3.46702	0.000526272	0.00753452	ASS1
ENSG00000034533	60.7154	0.162959	0.346097	0.470849	0.637749	0.833687	ASTE1
ENSG00000148219	145.161	-0.655192	0.300378	-2.18122	0.0291669	0.129435	ASTN2
ENSG00000171456	471.315	0.0440473	0.386283	0.114029	0.909215	0.964224	ASXL1
ENSG00000143970	615.205	-0.0123789	0.316399	-0.0391245	0.968791	0.98824	ASXL2
ENSG00000138138	559.814	0.448408	0.275896	1.62528	0.104103	0.297696	ATAD1
ENSG00000156802	1126.41	0.289057	0.204532	1.41326	0.157579	0.387144	ATAD2
ENSG00000119778	212.509	0.158003	0.254992	0.61964	0.535495	0.766157	ATAD2B
ENSG00000197785	1085.67	0.307572	0.210297	1.46256	0.143586	0.365747	ATAD3A
ENSG00000160072	977.589	0.770385	0.216701	3.55505	0.000377901	0.00582286	ATAD3B
ENSG00000176208	100.353	1.06192	0.568906	1.86661	0.0619566	0.213664	ATAD5
ENSG00000137343	115.444	-0.339806	0.302523	-1.12324	0.261337	0.523477	ATAT1
ENSG00000107669	293.166	0.384781	0.225307	1.70781	0.0876717	0.266454	ATE1
ENSG00000123268	205.243	0.540875	0.248141	2.17971	0.0292788	0.129628	ATF1
ENSG00000115966	539.806	0.297128	0.16538	1.79664	0.0723931	0.235031	ATF2
ENSG00000162772	127.132	2.75525	0.404911	6.80459	1.01e-11	2.17e-09	ATF3
ENSG00000128272	2991.88	0.72459	0.138001	5.25061	1.52e-07	9.62e-06	ATF4
ENSG00000169136	1068.31	0.601955	0.223646	2.69156	0.00711189	0.0489946	ATF5
ENSG00000118217	1082.08	0.395575	0.158787	2.49124	0.0127298	0.0729713	ATF6
ENSG00000213676	716.771	-0.147166	0.157009	-0.937308	0.3486	0.61458	ATF6B
ENSG00000170653	209.276	0.115449	0.362951	0.318084	0.750421	0.891676	ATF7
ENSG00000171681	1000.19	-0.102445	0.236127	-0.433857	0.664393	0.847852	ATF7IP
ENSG00000166669	27.8861	0.307896	0.542058	0.568012	0.570027	0.788063	ATF7IP2
ENSG00000152348	141.913	-0.162017	0.239708	-0.675894	0.499108	0.739216	ATG10
ENSG00000123395	427.888	0.33031	0.258334	1.27861	0.201033	0.447274	ATG101
ENSG00000145782	460.012	0.333589	0.253125	1.31788	0.187543	0.429601	ATG12
ENSG00000175224	711.734	0.24352	0.166679	1.46101	0.144013	0.366462	ATG13
ENSG00000126775	263.553	0.153206	0.240137	0.637993	0.523478	0.757907	ATG14
ENSG00000085978	598.838	0.462654	0.157361	2.94009	0.00328117	0.0281628	ATG16L1
ENSG00000168010	87.7857	-1.23987	0.322453	-3.84512	0.000120493	0.00238557	ATG16L2
ENSG00000110046	381.22	0.688539	0.237571	2.89825	0.0037525	0.0310168	ATG2A
ENSG00000066739	331.37	0.112407	0.219284	0.512609	0.608225	0.812607	ATG2B
ENSG00000144848	775.504	0.121589	0.150687	0.806896	0.419726	0.676371	ATG3
ENSG00000101844	147.562	0.41119	0.310998	1.32217	0.186113	0.427927	ATG4A
ENSG00000168397	798.449	-0.0455095	0.165389	-0.275166	0.783189	0.904922	ATG4B
ENSG00000125703	134.134	0.597279	0.338899	1.76241	0.0780001	0.24633	ATG4C
ENSG00000130734	234.9	0.105128	0.222936	0.471564	0.637238	0.833267	ATG4D
ENSG00000057663	572.972	0.491729	0.17847	2.75524	0.00586484	0.0430881	ATG5
ENSG00000197548	215.533	0.707435	0.225884	3.13185	0.00173708	0.0178385	ATG7
ENSG00000198925	653.846	-0.00174509	0.194066	-0.00899228	0.992825	0.998048	ATG9A
ENSG00000138363	2164.71	0.18005	0.13357	1.34799	0.177662	0.416575	ATIC
ENSG00000119787	596.756	0.599462	0.218475	2.74384	0.00607245	0.0440974	ATL2
ENSG00000184743	226.508	0.649869	0.274005	2.37174	0.0177046	0.091629	ATL3
ENSG00000149311	455.504	-0.227251	0.314644	-0.722249	0.470141	0.717167	ATM
ENSG00000166454	697.334	0.502005	0.183857	2.73041	0.00632548	0.0452959	ATMIN
ENSG00000111676	1496.66	0.097282	0.177704	0.54744	0.584077	0.79732	ATN1
ENSG00000177556	460.293	-0.139139	0.214089	-0.649912	0.515749	0.751981	ATOX1
ENSG00000068650	301.548	0.280735	0.289883	0.968443	0.332823	0.600535	ATP11A
ENSG00000058063	674.714	0.527339	0.281193	1.87537	0.0607421	0.21122	ATP11B
ENSG00000101974	164.731	0.534364	0.269789	1.98067	0.0476281	0.180153	ATP11C
ENSG00000105726	691.156	-0.249286	0.159093	-1.56691	0.117135	0.321072	ATP13A1
ENSG00000159363	429.404	-0.00863197	0.21227	-0.040665	0.967563	0.987931	ATP13A2
ENSG00000133657	1388.38	1.35566	0.193672	6.99979	2.56e-12	6.17e-10	ATP13A3
ENSG00000163399	2743.86	0.387813	0.143154	2.70907	0.0067473	0.0473803	ATP1A1
ENSG00000203865	211.807	0.465191	0.214773	2.16597	0.0303136	0.132515	ATP1A1-AS1
ENSG00000105409	213.429	-0.0655826	0.272857	-0.240355	0.810055	0.91773	ATP1A3
ENSG00000143153	219.982	0.780393	0.212156	3.67839	0.000234714	0.00405354	ATP1B1
ENSG00000069849	1126.44	-0.131233	0.23448	-0.559678	0.575699	0.79174	ATP1B3
ENSG00000166896	189.632	-0.586654	0.247291	-2.37232	0.0176767	0.0915451	ATP23
ENSG00000196296	77.0003	-0.542648	0.370898	-1.46307	0.143449	0.365451	ATP2A1
ENSG00000260442	16.6409	0.293234	0.72027	0.407117	0.683922	0.857879	ATP2A1-AS1
ENSG00000174437	1730.83	0.429362	0.179111	2.39719	0.0165216	0.0875952	ATP2A2
ENSG00000070961	117.836	1.34045	0.370047	3.62239	0.000291899	0.00476776	ATP2B1
ENSG00000058668	2102.92	0.224611	0.233007	0.963964	0.335064	0.602389	ATP2B4
ENSG00000017260	1260.42	0.530827	0.193954	2.73687	0.00620272	0.0447476	ATP2C1
ENSG00000152234	6004.52	-0.219873	0.123372	-1.78219	0.0747184	0.239406	ATP5F1A
ENSG00000110955	4879.5	-0.310529	0.205932	-1.50792	0.131576	0.346565	ATP5F1B
ENSG00000165629	3212.2	-0.499811	0.166206	-3.00718	0.00263683	0.0241198	ATP5F1C
ENSG00000099624	476.833	-0.563277	0.306686	-1.83666	0.0662607	0.223124	ATP5F1D
ENSG00000124172	3239.89	-0.1825	0.164358	-1.11038	0.266834	0.53014	ATP5F1E
ENSG00000130770	754.271	-0.335132	0.223252	-1.50113	0.133321	0.349056	ATP5IF1
ENSG00000159199	453.342	-0.0419555	0.236296	-0.177555	0.859073	0.941019	ATP5MC1
ENSG00000135390	594.671	-0.416605	0.169198	-2.46224	0.0138074	0.077382	ATP5MC2
ENSG00000154518	2496.23	-0.228656	0.126719	-1.80443	0.0711635	0.232811	ATP5MC3
ENSG00000173915	1360.5	0.364636	0.200192	1.82144	0.0685407	0.227104	ATP5MD
ENSG00000169020	1841.34	-0.478558	0.250334	-1.91168	0.0559178	0.200508	ATP5ME
ENSG00000241468	1257.89	-0.0568187	0.232698	-0.244173	0.807097	0.916757	ATP5MF
ENSG00000248919	106.322	-1.59803	0.48838	-3.27211	0.00106749	0.012565	ATP5MF-PTCD1
ENSG00000167283	777.149	-0.0565551	0.152636	-0.370522	0.710993	0.872294	ATP5MG
ENSG00000156411	668.765	-0.0931786	0.179483	-0.519151	0.603656	0.810372	ATP5MPL
ENSG00000116459	2771.96	-0.507279	0.164922	-3.07587	0.0020989	0.020455	ATP5PB
ENSG00000167863	1521.82	0.101888	0.165424	0.615921	0.537947	0.767715	ATP5PD
ENSG00000154723	820.886	0.258601	0.216538	1.19425	0.23238	0.4877	ATP5PF
ENSG00000241837	2459.81	-0.468731	0.225814	-2.07574	0.0379178	0.153921	ATP5PO
ENSG00000198899	24510.1	-0.143781	0.216309	-0.664702	0.506241	0.74398	ATP6
ENSG00000071553	938.401	-0.463953	0.146404	-3.16899	0.00152968	0.0162693	ATP6AP1
ENSG00000182220	402.013	-1.04131	0.283168	-3.67737	0.000235649	0.0040617	ATP6AP2
ENSG00000033627	400.327	0.286145	0.220424	1.29816	0.194232	0.439428	ATP6V0A1
ENSG00000185344	185.002	0.600101	0.277596	2.16178	0.0306351	0.133481	ATP6V0A2
ENSG00000117410	681.317	-0.0440848	0.196276	-0.224606	0.822285	0.923364	ATP6V0B
ENSG00000185883	544.284	0.0762925	0.254835	0.29938	0.76465	0.896712	ATP6V0C
ENSG00000159720	925.297	-0.123087	0.215869	-0.570194	0.568546	0.787614	ATP6V0D1
ENSG00000113732	1729.65	-0.0246394	0.142495	-0.172914	0.862719	0.943132	ATP6V0E1
ENSG00000171130	205.313	-1.27645	0.421953	-3.0251	0.0024855	0.0231818	ATP6V0E2
ENSG00000204934	88.7921	-0.0766096	0.321085	-0.238596	0.811419	0.917936	ATP6V0E2-AS1
ENSG00000114573	419.053	0.447905	0.338314	1.32393	0.185525	0.427038	ATP6V1A
ENSG00000239322	42.7478	2.05081	0.658623	3.11379	0.001847	0.0185661	ATP6V1B1-AS1
ENSG00000147416	1141.85	0.407529	0.174578	2.33436	0.019577	0.0984786	ATP6V1B2
ENSG00000155097	681.627	0.433724	0.188573	2.30003	0.0214465	0.104475	ATP6V1C1
ENSG00000143882	148.992	-0.235692	0.568931	-0.414271	0.678675	0.855027	ATP6V1C2
ENSG00000100554	511.822	0.194257	0.241279	0.805113	0.420754	0.677469	ATP6V1D
ENSG00000131100	1226.54	0.311433	0.166024	1.87584	0.0606778	0.211117	ATP6V1E1
ENSG00000250565	59.1495	0.0974347	0.378422	0.257476	0.796811	0.911968	ATP6V1E2
ENSG00000128524	1328.08	-0.0303057	0.139311	-0.217539	0.827788	0.926257	ATP6V1F
ENSG00000136888	999.001	0.295694	0.199763	1.48022	0.138814	0.357895	ATP6V1G1
ENSG00000213760	13.8364	-1.30773	0.7553	-1.7314	0.0833802	0.257538	ATP6V1G2
ENSG00000254870	128.061	3.96159	1.68605	2.34963	0.0187921	0.0957184	ATP6V1G2-DDX39B
ENSG00000047249	318.578	0.157289	0.211993	0.741955	0.458115	0.708802	ATP6V1H
ENSG00000165240	102.535	0.0513039	0.273352	0.187684	0.851124	0.937041	ATP7A
ENSG00000123191	128.741	-0.190632	0.359247	-0.530644	0.595666	0.805755	ATP7B
ENSG00000228253	10103.9	-0.00731428	0.212399	-0.0344365	0.972529	0.989945	ATP8
ENSG00000143515	497.414	-0.49517	0.239063	-2.0713	0.0383311	0.155008	ATP8B2
ENSG00000130270	224.355	-0.156019	0.275479	-0.566357	0.571151	0.788889	ATP8B3
ENSG00000054793	119.026	0.331426	0.395231	0.838561	0.401716	0.661302	ATP9A
ENSG00000166377	189.334	-0.479562	0.230892	-2.077	0.0378016	0.153663	ATP9B
ENSG00000123472	622.95	-0.0944706	0.26978	-0.350177	0.726206	0.880512	ATPAF1
ENSG00000171953	199.781	-0.67118	0.269893	-2.48683	0.0128886	0.0735456	ATPAF2
ENSG00000175054	536.192	0.431945	0.236664	1.82514	0.0679801	0.2263	ATR
ENSG00000138085	780.074	-0.605623	0.188397	-3.21461	0.00130623	0.0145892	ATRAID
ENSG00000164053	148.279	0.141632	0.350218	0.404411	0.68591	0.858963	ATRIP
ENSG00000088812	659.258	-0.0242093	0.175456	-0.137979	0.890257	0.955239	ATRN
ENSG00000085224	560.049	0.266011	0.289488	0.918902	0.358147	0.623116	ATRX
ENSG00000130638	635.567	-0.149677	0.155543	-0.962286	0.335906	0.603409	ATXN10
ENSG00000224470	660.539	0.363139	0.180156	2.0157	0.0438316	0.170271	ATXN1L
ENSG00000204842	384.625	0.0253131	0.16745	0.151168	0.879843	0.950802	ATXN2
ENSG00000168488	1112.54	0.376343	0.160174	2.34959	0.0187942	0.0957184	ATXN2L
ENSG00000066427	191.872	0.446963	0.243219	1.8377	0.0661067	0.22278	ATXN3
ENSG00000163635	36.0703	0.827829	0.660405	1.25352	0.210018	0.45953	ATXN7
ENSG00000285258	112.821	0.981454	0.403268	2.43375	0.0149433	0.0818149	ATXN7
ENSG00000146776	74.078	-0.343512	0.411456	-0.83487	0.403791	0.662587	ATXN7L1
ENSG00000162650	51.2239	-0.111821	0.367348	-0.304401	0.760823	0.895436	ATXN7L2
ENSG00000087152	546.935	-0.169157	0.29314	-0.577052	0.563904	0.784649	ATXN7L3
ENSG00000253719	480.431	0.118722	0.178472	0.665214	0.505914	0.743775	ATXN7L3B
ENSG00000148090	169.453	-0.563375	0.254676	-2.21212	0.0269583	0.122595	AUH
ENSG00000127423	129.179	0.726852	0.355408	2.04512	0.0408431	0.161908	AUNIP
ENSG00000115307	1601.07	0.187209	0.147351	1.2705	0.203907	0.451781	AUP1
ENSG00000087586	1733.99	0.742101	0.177622	4.17799	2.94e-05	0.000789399	AURKA
ENSG00000175756	1280.47	-0.2255	0.181042	-1.24557	0.212923	0.463062	AURKAIP1
ENSG00000178999	757.392	0.0119321	0.14949	0.0798188	0.936381	0.976135	AURKB
ENSG00000169857	183.619	0.479264	0.290277	1.65106	0.0987272	0.287467	AVEN
ENSG00000105778	489.261	0.414076	0.355638	1.16432	0.244296	0.503446	AVL9
ENSG00000119986	361.236	0.499499	0.241625	2.06725	0.0387105	0.155737	AVPI1
ENSG00000103126	545.22	0.202339	0.181302	1.11603	0.264408	0.526951	AXIN1
ENSG00000167601	1049.54	1.29316	0.175363	7.3742	1.65e-13	4.69e-11	AXL
ENSG00000163512	202.54	0.296993	0.227038	1.30812	0.190833	0.434525	AZI2
ENSG00000155096	925.74	1.17276	0.249471	4.70101	2.59e-06	0.000106841	AZIN1
ENSG00000142920	123.679	-0.704516	0.330699	-2.13039	0.0331396	0.140765	AZIN2
ENSG00000172232	33.9558	-1.08899	0.581582	-1.87247	0.0611422	0.212047	AZU1
ENSG00000166710	1739.99	-0.879557	0.309077	-2.84575	0.00443065	0.0350249	B2M
ENSG00000162885	539.886	0.551998	0.183844	3.00253	0.00267742	0.0243517	B3GALNT2
ENSG00000176022	314.234	-0.281981	0.19316	-1.45983	0.144335	0.366778	B3GALT6
ENSG00000149541	302.109	-0.298222	0.186804	-1.59644	0.11039	0.308934	B3GAT3
ENSG00000187676	103.152	-0.164024	0.286709	-0.572092	0.567259	0.786849	B3GLCT
ENSG00000170340	255.02	0.776238	0.242869	3.19612	0.00139291	0.0152061	B3GNT2
ENSG00000176597	46.4267	2.95596	0.801942	3.686	0.000227803	0.00396928	B3GNT5
ENSG00000237172	112.568	-0.472233	0.288219	-1.63845	0.101328	0.292184	B3GNT9
ENSG00000175711	153.583	-0.00532285	0.281657	-0.0188984	0.984922	0.995735	B3GNTL1
ENSG00000135454	238.462	0.0517898	0.240717	0.215148	0.829652	0.927138	B4GALNT1
ENSG00000139044	84.8946	-0.543928	0.400241	-1.359	0.174147	0.412069	B4GALNT3
ENSG00000182272	629.508	-0.64699	0.177464	-3.64575	0.000266614	0.00443877	B4GALNT4
ENSG00000086062	138.711	0.358228	0.273057	1.31192	0.189549	0.432787	B4GALT1
ENSG00000117411	714.703	-0.26833	0.161019	-1.66645	0.0956228	0.281552	B4GALT2
ENSG00000158850	400.884	0.383445	0.171741	2.2327	0.0255687	0.118233	B4GALT3
ENSG00000121578	198.808	0.38563	0.242385	1.59098	0.111614	0.311029	B4GALT4
ENSG00000158470	788.611	0.567091	0.213148	2.66055	0.00780143	0.0523699	B4GALT5
ENSG00000027847	325.946	0.289427	0.259151	1.11683	0.264068	0.526617	B4GALT7
ENSG00000174684	156.892	-1.22409	0.270699	-4.52194	6.13e-06	0.000220299	B4GAT1
ENSG00000108641	251.217	-0.575712	0.305074	-1.88712	0.059144	0.207464	B9D1
ENSG00000123810	45.2046	-0.02697	0.416073	-0.0648203	0.948317	0.98038	B9D2
ENSG00000105393	1157.86	-0.351454	0.185709	-1.8925	0.0584249	0.205969	BABAM1
ENSG00000158019	330.472	0.673874	0.210715	3.19804	0.00138366	0.0151564	BABAM2
ENSG00000186318	164.104	-0.143943	0.395507	-0.363945	0.715899	0.874529	BACE1
ENSG00000182240	234.989	-0.608128	0.223118	-2.72558	0.00641879	0.0457433	BACE2
ENSG00000156273	283.514	1.39442	0.269667	5.17091	2.33e-07	1.38e-05	BACH1
ENSG00000002330	250.772	-0.633495	0.308595	-2.05284	0.0400883	0.159962	BAD
ENSG00000107262	195.172	0.493874	0.38542	1.28139	0.200055	0.446002	BAG1
ENSG00000112208	323.334	0.914528	0.253247	3.61121	0.000304772	0.00491578	BAG2
ENSG00000151929	774.997	0.703464	0.168393	4.17751	2.95e-05	0.000789842	BAG3
ENSG00000156735	163.671	0.97489	0.293577	3.32073	0.000897832	0.0111082	BAG4
ENSG00000166170	402.96	0.626402	0.257392	2.43365	0.0149474	0.0818149	BAG5
ENSG00000204463	1728.36	0.0787637	0.149982	0.525155	0.599475	0.807747	BAG6
ENSG00000266074	138.557	-0.929147	0.295593	-3.14334	0.00167034	0.0173662	BAHCC1
ENSG00000140320	330.712	-0.0684971	0.282891	-0.242133	0.808677	0.917085	BAHD1
ENSG00000175866	349.667	0.207843	0.200533	1.03645	0.299991	0.566261	BAIAP2
ENSG00000226137	204.272	-1.27407	0.249154	-5.11361	3.16e-07	1.78e-05	BAIAP2-DT
ENSG00000006453	199.097	-0.0576002	0.242381	-0.237644	0.812157	0.918234	BAIAP2L1
ENSG00000007516	199.796	0.144967	0.320534	0.452266	0.651077	0.840487	BAIAP3
ENSG00000030110	549.916	0.265873	0.1725	1.54129	0.123246	0.332432	BAK1
ENSG00000095739	28.9962	0.272042	1.02377	0.265727	0.79045	0.90917	BAMBI
ENSG00000175334	436.014	-0.0863259	0.412567	-0.209241	0.83426	0.929299	BANF1
ENSG00000172530	292.408	0.1023	0.241346	0.423874	0.671658	0.851709	BANP
ENSG00000163930	886.03	-0.111587	0.174574	-0.639193	0.522697	0.757089	BAP1
ENSG00000138376	142.257	0.262337	0.288667	0.908788	0.363462	0.628013	BARD1
ENSG00000043039	229.932	0.0549527	0.211893	0.259342	0.795372	0.910991	BARX2
ENSG00000123685	18.1773	2.12691	0.785393	2.70808	0.00676737	0.0474769	BATF3
ENSG00000087088	718.313	-0.159821	0.14109	-1.13276	0.257315	0.518856	BAX
ENSG00000198604	929.904	0.766894	0.19934	3.84716	0.000119494	0.00237642	BAZ1A
ENSG00000009954	3002	0.597585	0.196749	3.03729	0.00238715	0.0225032	BAZ1B
ENSG00000076108	1120.81	-0.00813964	0.156239	-0.0520974	0.958451	0.984778	BAZ2A
ENSG00000123636	209.967	0.339624	0.312661	1.08624	0.277374	0.541713	BAZ2B
ENSG00000105327	140.229	0.167311	0.326292	0.512765	0.608116	0.812607	BBC3
ENSG00000214413	123.186	-0.20495	0.342622	-0.598182	0.549718	0.775534	BBIP1
ENSG00000119636	27.7466	-0.0887147	0.535162	-0.165772	0.868337	0.945755	BBOF1
ENSG00000254560	20.1766	0.0519481	0.660029	0.0787057	0.937267	0.976595	BBOX1-AS1
ENSG00000174483	61.0316	-0.0471098	0.507288	-0.092866	0.92601	0.971606	BBS1
ENSG00000179941	193.281	0.0434464	0.276024	0.157401	0.874929	0.949048	BBS10
ENSG00000125124	550.152	-0.744599	0.186566	-3.99107	6.58e-05	0.0014909	BBS2
ENSG00000140463	91.5457	-0.494149	0.327688	-1.50799	0.131558	0.346565	BBS4
ENSG00000163093	125.978	-0.020434	0.315576	-0.0647516	0.948372	0.98038	BBS5
ENSG00000138686	261.562	0.405444	0.220172	1.84149	0.0655503	0.221521	BBS7
ENSG00000122507	112.268	-0.615704	0.288248	-2.13602	0.0326779	0.139784	BBS9
ENSG00000114439	234.66	0.629875	0.373788	1.68511	0.0919672	0.274698	BBX
ENSG00000187244	393.533	-1.03767	0.262859	-3.94764	7.89e-05	0.0017152	BCAM
ENSG00000132692	28.6137	0.984265	0.544263	1.80844	0.0705386	0.231412	BCAN
ENSG00000075790	223.041	0.173843	0.370064	0.469765	0.638523	0.834017	BCAP29
ENSG00000185825	2161.63	-0.54605	0.171956	-3.17552	0.00149571	0.0160462	BCAP31
ENSG00000050820	865.154	0.245541	0.17265	1.42219	0.154972	0.382932	BCAR1
ENSG00000137936	2547.54	0.458477	0.132338	3.46444	0.000531334	0.00757614	BCAR3
ENSG00000116752	660.285	0.727941	0.168176	4.32844	1.5e-05	0.000461555	BCAS2
ENSG00000141376	281.478	-0.34988	0.253126	-1.38224	0.166898	0.40151	BCAS3
ENSG00000124243	1648.57	-0.695246	0.21512	-3.2319	0.00122969	0.0140295	BCAS4
ENSG00000105552	728.871	-0.192295	0.198581	-0.968344	0.332873	0.600535	BCAT2
ENSG00000107949	1140.53	0.287283	0.233216	1.23183	0.218012	0.469254	BCCIP
ENSG00000186666	53.8618	0.371284	0.437722	0.848219	0.396316	0.656086	BCDIN3D
ENSG00000248098	623.988	-0.585563	0.202903	-2.88593	0.00390257	0.0318973	BCKDHA
ENSG00000083123	260.372	-0.494766	0.25085	-1.97236	0.0485689	0.182533	BCKDHB
ENSG00000103507	535.168	-0.363823	0.178166	-2.04204	0.0411473	0.162784	BCKDK
ENSG00000142867	490.686	1.30635	0.253342	5.15647	2.52e-07	1.47e-05	BCL10
ENSG00000171791	85.1444	1.20635	0.448969	2.68693	0.0072112	0.0494655	BCL2
ENSG00000171552	640.429	0.54746	0.17783	3.07856	0.00208007	0.0203052	BCL2L1
ENSG00000153094	130.114	-0.321244	0.296061	-1.08506	0.277895	0.54243	BCL2L11
ENSG00000126453	445.182	0.255879	0.164846	1.55223	0.120607	0.327677	BCL2L12
ENSG00000099968	1212.56	0.0495367	0.135701	0.365042	0.71508	0.874101	BCL2L13
ENSG00000129473	316.979	-0.220868	0.777312	-0.284144	0.7763	0.901855	BCL2L2
ENSG00000258643	104.918	0.654666	0.463106	1.41364	0.157467	0.387032	BCL2L2-PABPN1
ENSG00000069399	220.697	-0.351298	0.270114	-1.30055	0.193412	0.438192	BCL3
ENSG00000113916	205.007	-0.445239	0.232529	-1.91477	0.055522	0.199577	BCL6
ENSG00000110987	89.8738	0.107572	0.349239	0.308017	0.758069	0.894291	BCL7A
ENSG00000106635	493.944	0.375829	0.182288	2.06174	0.0392329	0.157478	BCL7B
ENSG00000099385	1024.99	-0.430251	0.169035	-2.54534	0.0109172	0.0661617	BCL7C
ENSG00000116128	294.147	-0.152357	0.225239	-0.676425	0.498771	0.739117	BCL9
ENSG00000186174	482.036	0.498227	0.234058	2.12865	0.0332835	0.141072	BCL9L
ENSG00000029363	1175.3	0.845315	0.228627	3.69735	0.000217864	0.00383027	BCLAF1
ENSG00000173681	132.708	0.365371	0.265766	1.37479	0.169198	0.405213	BCLAF3
ENSG00000183337	392.26	0.464801	0.239748	1.93871	0.0525372	0.192509	BCOR
ENSG00000085185	265.48	0.0632543	0.256567	0.246542	0.805263	0.91615	BCORL1
ENSG00000186716	724.712	-0.0822522	0.160325	-0.513033	0.607928	0.812607	BCR
ENSG00000074582	375.112	-0.186558	0.204409	-0.912669	0.361417	0.626016	BCS1L
ENSG00000236824	44.0977	0.886063	0.488903	1.81235	0.0699322	0.230361	BCYRN1
ENSG00000161267	411.507	-0.35643	0.206164	-1.72887	0.0838322	0.258435	BDH1
ENSG00000164039	45.384	-0.379145	0.454633	-0.833958	0.404304	0.663129	BDH2
ENSG00000145734	832.74	0.646141	0.204568	3.15857	0.00158547	0.0166512	BDP1
ENSG00000166546	51.9444	-0.80108	0.409291	-1.95724	0.0503194	0.186638	BEAN1
ENSG00000126581	718.706	-0.0691318	0.163101	-0.423859	0.671668	0.851709	BECN1
ENSG00000183092	567.965	-0.813123	0.163714	-4.96674	6.81e-07	3.41e-05	BEGAIN
ENSG00000178409	88.6208	1.14273	0.352783	3.23919	0.0011987	0.013765	BEND3
ENSG00000165626	106.217	0.232804	0.297603	0.782263	0.43406	0.688893	BEND7
ENSG00000167995	75.0354	2.07574	0.567586	3.65714	0.000255042	0.00429081	BEST1
ENSG00000105829	246.437	0.294689	0.26043	1.13154	0.257826	0.519308	BET1
ENSG00000177951	324.998	-0.113603	0.175083	-0.64885	0.516435	0.75242	BET1L
ENSG00000133134	78.0681	1.48211	0.343741	4.3117	1.62e-05	0.000488061	BEX2
ENSG00000166681	2197.91	-0.892989	0.187808	-4.75479	1.99e-06	8.52e-05	BEX3
ENSG00000103429	401.763	-0.370844	0.394219	-0.940705	0.346856	0.613557	BFAR
ENSG00000125864	99.86	-1.19513	0.30523	-3.91552	9.02e-05	0.00191084	BFSP1
ENSG00000134107	359.021	1.22057	0.207682	5.87713	4.17e-09	4.36e-07	BHLHE40
ENSG00000123095	239.268	0.299125	0.22443	1.33282	0.182592	0.423502	BHLHE41
ENSG00000151746	283.495	0.574492	0.289673	1.98324	0.0473401	0.179576	BICD1
ENSG00000185963	991.134	0.0955129	0.142584	0.669872	0.50294	0.741856	BICD2
ENSG00000063169	84.0396	-0.0872959	0.295717	-0.295201	0.76784	0.898223	BICRA
ENSG00000112624	110.27	0.17663	0.273283	0.646327	0.518068	0.7533	BICRAL
ENSG00000015475	910.869	-0.341588	0.14866	-2.29778	0.0215741	0.104835	BID
ENSG00000136717	632.129	-0.0851921	0.194675	-0.437612	0.661667	0.846389	BIN1
ENSG00000147439	243.481	-0.157329	0.215424	-0.730323	0.465192	0.713504	BIN3
ENSG00000110330	512.358	0.581905	0.232285	2.50513	0.0122407	0.0710009	BIRC2
ENSG00000023445	354.048	2.20474	0.257952	8.5471	1.26e-17	7.92e-15	BIRC3
ENSG00000089685	461.628	-0.141213	0.289791	-0.487292	0.626051	0.825308	BIRC5
ENSG00000115760	1163.44	0.171949	0.172786	0.995152	0.319663	0.587435	BIRC6
ENSG00000134897	90.5971	-0.820401	0.550453	-1.49041	0.136117	0.353594	BIVM
ENSG00000166619	405.303	0.020007	0.2007	0.0996864	0.920593	0.968637	BLCAP
ENSG00000197299	196.265	0.770686	0.378456	2.0364	0.0417104	0.164604	BLM
ENSG00000108578	479.505	-0.189905	0.177322	-1.07096	0.284187	0.549815	BLMH
ENSG00000135441	264.593	-0.388064	0.275984	-1.40611	0.159691	0.390758	BLOC1S1
ENSG00000196072	268.938	-0.342567	0.3614	-0.947889	0.343186	0.610862	BLOC1S2
ENSG00000189114	78.4059	0.56403	0.352736	1.59902	0.109817	0.307997	BLOC1S3
ENSG00000186222	147.53	0.0449576	0.236809	0.189848	0.849429	0.935995	BLOC1S4
ENSG00000188428	155.436	-0.0597117	0.249163	-0.239649	0.810602	0.917889	BLOC1S5
ENSG00000259040	2519.78	-0.108006	3.32046	-0.0325276	0.974051	0.990419	BLOC1S5-TXNDC5
ENSG00000104164	265.122	0.632725	0.397228	1.59285	0.111193	0.310202	BLOC1S6
ENSG00000106605	290.711	-0.208731	0.207261	-1.00709	0.313891	0.580896	BLVRA
ENSG00000090013	1124.41	-0.955629	0.336183	-2.84259	0.00447491	0.0352953	BLVRB
ENSG00000117475	195.027	0.701501	0.297345	2.35922	0.0183136	0.0938417	BLZF1
ENSG00000168283	228.902	1.21357	0.354551	3.42283	0.000619731	0.00855891	BMI1
ENSG00000168487	265.419	-0.86291	0.224789	-3.83876	0.000123656	0.00243721	BMP1
ENSG00000138756	186.426	1.89763	0.323999	5.8569	4.72e-09	4.79e-07	BMP2K
ENSG00000101144	376.121	0.122017	0.227287	0.536841	0.591377	0.802694	BMP7
ENSG00000116985	86.1634	-0.629835	0.335349	-1.87815	0.0603612	0.210266	BMP8B
ENSG00000107779	357.759	0.237469	0.226706	1.04747	0.294881	0.561862	BMPR1A
ENSG00000204217	277.069	0.454477	0.285735	1.59055	0.11171	0.3112	BMPR2
ENSG00000165733	1752.04	0.440433	0.20297	2.16995	0.0300108	0.131707	BMS1
ENSG00000204177	61.2137	-0.00253121	0.486019	-0.00520805	0.995845	0.999084	BMS1P1
ENSG00000251079	22.5107	-0.282684	0.871205	-0.324475	0.745579	0.889222	BMS1P2
ENSG00000271816	26.207	-0.000150564	0.808444	-0.000186239	0.999851	0.999965	BMS1P4
ENSG00000164603	72.4233	0.588654	0.547428	1.07531	0.282236	0.547622	BMT2
ENSG00000113734	134.723	0.0213196	0.315238	0.0676304	0.94608	0.979872	BNIP1
ENSG00000140299	331.994	0.579716	0.198135	2.92586	0.00343508	0.0289928	BNIP2
ENSG00000104765	683.445	0.155792	0.17459	0.892328	0.372217	0.635891	BNIP3L
ENSG00000145919	1383.6	-0.0252334	0.229477	-0.10996	0.912441	0.96551	BOD1
ENSG00000038219	498.528	0.440758	0.166419	2.64848	0.00808544	0.0537227	BOD1L1
ENSG00000176720	549.715	0.304348	0.180306	1.68795	0.0914203	0.273544	BOK
ENSG00000183336	338.421	0.139078	0.270557	0.514043	0.607222	0.812386	BOLA2
ENSG00000169627	489.213	0.0168055	0.254216	0.0661073	0.947292	0.980145	BOLA2B
ENSG00000261740	385.807	-0.0262612	0.203867	-0.128815	0.897504	0.958149	BOLA2-SMG1P6
ENSG00000163170	297.339	0.208979	0.362816	0.575991	0.564621	0.785038	BOLA3
ENSG00000225439	27.4903	-0.680308	0.578482	-1.17602	0.239585	0.49756	BOLA3-AS1
ENSG00000261236	1761.84	0.165465	0.149421	1.10737	0.268133	0.531966	BOP1
ENSG00000136122	298.741	0.4653	0.254853	1.82576	0.0678867	0.2263	BORA
ENSG00000165714	79.1929	-0.215158	0.336157	-0.640052	0.522139	0.756588	BORCS5
ENSG00000196544	104.117	-0.534884	0.303521	-1.76227	0.0780243	0.246362	BORCS6
ENSG00000166275	49.2385	0.0850568	0.398709	0.213331	0.831069	0.927936	BORCS7
ENSG00000254901	111.977	-0.598197	0.327184	-1.82832	0.0675012	0.22553	BORCS8
ENSG00000064489	41.5722	0.791843	0.510078	1.5524	0.120567	0.327618	BORCS8-MEF2B
ENSG00000172331	167.352	0.394229	0.270276	1.45862	0.14467	0.367179	BPGM
ENSG00000137274	163.192	-1.23309	0.315506	-3.90831	9.29e-05	0.00195229	BPHL
ENSG00000162813	413.372	-0.145543	0.197334	-0.737545	0.460791	0.711065	BPNT1
ENSG00000171634	792.392	-0.0524838	0.196022	-0.267744	0.788897	0.908345	BPTF
ENSG00000157764	466.209	0.229983	0.244473	0.94073	0.346843	0.613557	BRAF
ENSG00000089234	314.95	0.369937	0.176926	2.09091	0.0365358	0.150135	BRAP
ENSG00000106009	594.753	-0.329651	0.153098	-2.15321	0.0313024	0.135358	BRAT1
ENSG00000012048	368.299	-0.212874	0.20241	-1.0517	0.292939	0.559982	BRCA1
ENSG00000139618	147.789	0.977428	0.435639	2.24366	0.024854	0.115842	BRCA2
ENSG00000185515	371.091	0.327378	0.220124	1.48724	0.136951	0.354809	BRCC3
ENSG00000100425	330.054	0.130102	0.205151	0.634176	0.525966	0.759446	BRD1
ENSG00000204256	1539.13	0.300369	0.127143	2.36244	0.0181548	0.0932457	BRD2
ENSG00000169925	343.725	0.187818	0.234967	0.799336	0.424095	0.679966	BRD3
ENSG00000235106	311.999	-0.69677	0.365294	-1.90742	0.0564657	0.201773	BRD3OS
ENSG00000141867	586.121	0.651345	0.182385	3.57126	0.000355272	0.00554219	BRD4
ENSG00000166164	1064.35	0.36432	0.191314	1.90431	0.0568705	0.202459	BRD7
ENSG00000112983	1599.76	-0.240149	0.131141	-1.83123	0.0670664	0.224718	BRD8
ENSG00000028310	624.352	0.0792798	0.158641	0.499742	0.617257	0.818858	BRD9
ENSG00000185024	287.801	-0.422538	0.193945	-2.17864	0.0293582	0.129842	BRF1
ENSG00000104221	178.149	0.199006	0.264598	0.752108	0.451986	0.704385	BRF2
ENSG00000164713	773.453	0.410462	0.159685	2.57045	0.0101567	0.062897	BRI3
ENSG00000184992	181.651	-0.143385	0.348459	-0.411483	0.680719	0.855952	BRI3BP
ENSG00000182685	24.333	-0.359497	0.538236	-0.667917	0.504187	0.742507	BRICD5
ENSG00000162670	358.738	-0.659633	0.211927	-3.11255	0.0018548	0.0186232	BRINP3
ENSG00000136492	158.177	0.345664	0.383533	0.901263	0.367448	0.631124	BRIP1
ENSG00000113460	704.239	0.992985	0.298868	3.32248	0.000892195	0.0110775	BRIX1
ENSG00000254999	971.346	-0.135963	0.14476	-0.939227	0.347614	0.614088	BRK1
ENSG00000174744	576.487	-0.173077	0.284546	-0.608258	0.543016	0.770709	BRMS1
ENSG00000100916	154.531	0.40832	0.283205	1.44178	0.149364	0.374185	BRMS1L
ENSG00000162819	321.205	0.774755	0.315157	2.45832	0.013959	0.0780578	BROX
ENSG00000156983	291.27	0.305654	0.219396	1.39316	0.163572	0.396547	BRPF1
ENSG00000096070	507.474	0.440307	0.208065	2.1162	0.0343274	0.14383	BRPF3
ENSG00000160469	54.719	-0.0984198	0.474915	-0.207237	0.835825	0.930193	BRSK1
ENSG00000174672	164.463	-0.0897407	0.273056	-0.328654	0.742418	0.88774	BRSK2
ENSG00000185658	707.491	0.332625	0.310168	1.0724	0.28354	0.549127	BRWD1
ENSG00000165288	387.601	-0.382111	0.220764	-1.73086	0.0834772	0.257747	BRWD3
ENSG00000168000	398.487	-0.750471	0.296017	-2.53523	0.0112374	0.0673301	BSCL2
ENSG00000160058	808.717	-0.347552	0.215897	-1.6098	0.107441	0.304182	BSDC1
ENSG00000172270	5186.78	-0.438166	0.149352	-2.93378	0.00334857	0.0285229	BSG
ENSG00000130303	156.227	-2.52237	0.382091	-6.60148	4.07e-11	7.53e-09	BST2
ENSG00000095564	1124.58	0.515222	0.16906	3.04757	0.00230702	0.0219479	BTAF1
ENSG00000064726	822.223	0.162102	0.230559	0.703084	0.482003	0.726455	BTBD1
ENSG00000148925	434.703	0.0915343	0.218754	0.418435	0.675629	0.853323	BTBD10
ENSG00000133243	1768.77	-0.726227	0.210419	-3.45133	0.000557827	0.00787723	BTBD2
ENSG00000132640	283.906	-0.2139	0.329218	-0.649722	0.515872	0.752098	BTBD3
ENSG00000011114	229.489	0.449939	0.270405	1.66395	0.0961226	0.28222	BTBD7
ENSG00000183826	110.746	0.282696	0.34827	0.811715	0.416955	0.674254	BTBD9
ENSG00000174808	88.6892	-0.613564	0.426822	-1.43752	0.150571	0.375915	BTC
ENSG00000169814	139.766	-0.532508	0.339454	-1.56872	0.116714	0.320345	BTD
ENSG00000145741	6510.38	0.219127	0.155974	1.40489	0.160053	0.391315	BTF3
ENSG00000134717	453.718	-0.0916979	0.168694	-0.543577	0.586733	0.79916	BTF3L4
ENSG00000133639	196.489	1.56123	0.32853	4.75216	2.01e-06	8.59e-05	BTG1
ENSG00000159388	312.588	-1.02416	0.195946	-5.22672	1.73e-07	1.08e-05	BTG2
ENSG00000154640	228.107	1.17188	0.301429	3.88775	0.000101177	0.00207561	BTG3
ENSG00000112763	449.545	0.125237	0.182583	0.685916	0.492766	0.734989	BTN2A1
ENSG00000124508	296.83	0.722212	0.278925	2.58927	0.0096181	0.0606078	BTN2A2
ENSG00000124549	133.452	0.0854843	0.293999	0.290764	0.771232	0.899561	BTN2A3P
ENSG00000026950	95.3931	-1.51155	0.343314	-4.40281	1.07e-05	0.000350505	BTN3A1
ENSG00000186470	128.287	0.191813	0.413634	0.463727	0.642843	0.836183	BTN3A2
ENSG00000111801	46.3838	-1.01923	0.440267	-2.31504	0.020611	0.101827	BTN3A3
ENSG00000165810	67.8869	-0.102348	0.610708	-0.16759	0.866906	0.945399	BTNL9
ENSG00000166167	473.885	-0.0473762	0.196272	-0.24138	0.809261	0.9172	BTRC
ENSG00000169679	2206.14	0.550996	0.177993	3.0956	0.00196412	0.0194214	BUB1
ENSG00000156970	939.322	0.176416	0.146534	1.20393	0.228618	0.482397	BUB1B
ENSG00000154473	2345.7	0.282547	0.15098	1.87141	0.0612877	0.212352	BUB3
ENSG00000137656	207.588	0.108055	0.232537	0.464677	0.642163	0.835853	BUD13
ENSG00000071462	1217.46	0.290992	0.171401	1.69772	0.08956	0.270124	BUD23
ENSG00000106245	628.562	0.302356	0.207095	1.45999	0.144293	0.366751	BUD31
ENSG00000112578	410.329	0.235394	0.217219	1.08367	0.278511	0.54304	BYSL
ENSG00000082153	1823.11	1.29121	0.253785	5.08783	3.62e-07	2e-05	BZW1
ENSG00000136261	1080.1	0.377489	0.170406	2.21523	0.026744	0.121957	BZW2
ENSG00000222047	67.8282	-1.12016	0.468992	-2.38843	0.0169203	0.088799	C10orf55
ENSG00000119965	137.856	0.190058	0.295891	0.642326	0.520662	0.755447	C10orf88
ENSG00000137720	198.242	-0.334704	0.266071	-1.25795	0.20841	0.457289	C11orf1
ENSG00000171067	238.503	0.603733	0.258091	2.33923	0.0193237	0.0976797	C11orf24
ENSG00000149179	156.304	-0.653207	0.340591	-1.91786	0.0551283	0.19869	C11orf49
ENSG00000182919	70.8622	-0.219523	0.446611	-0.491532	0.62305	0.823102	C11orf54
ENSG00000110696	1414.96	0.288196	0.212001	1.35941	0.174017	0.411983	C11orf58
ENSG00000175573	353.014	0.324487	0.201826	1.60776	0.107888	0.305095	C11orf68
ENSG00000180425	99.6575	-0.375337	0.388481	-0.966166	0.333961	0.601267	C11orf71
ENSG00000166352	70.107	-0.328739	0.371307	-0.885355	0.375965	0.638233	C11orf74
ENSG00000173715	55.9098	0.0414874	0.427788	0.0969813	0.922741	0.969891	C11orf80
ENSG00000188070	135.544	-0.236419	0.306164	-0.772198	0.439997	0.694	C11orf95
ENSG00000278615	136.922	-1.19034	0.413581	-2.87814	0.00400029	0.0324995	C11orf98
ENSG00000139637	319.261	0.0355458	0.21276	0.16707	0.867315	0.945621	C12orf10
ENSG00000133641	172.075	0.899188	0.322239	2.79044	0.00526363	0.0398536	C12orf29
ENSG00000047621	333.571	0.279369	0.265122	1.05374	0.292004	0.559168	C12orf4
ENSG00000157895	154.237	-0.0646061	0.24273	-0.266164	0.790113	0.909154	C12orf43
ENSG00000151131	127.626	0.801475	0.328453	2.44015	0.0146812	0.0808031	C12orf45
ENSG00000111412	277.767	0.723512	0.251548	2.87623	0.00402452	0.0326511	C12orf49
ENSG00000185306	46.5762	3.14631	0.543224	5.79192	6.96e-09	6.69e-07	C12orf56
ENSG00000111678	966.198	-1.20497	0.314989	-3.82543	0.000130544	0.00254734	C12orf57
ENSG00000182993	46.1585	0.663632	0.482467	1.3755	0.168977	0.404795	C12orf60
ENSG00000130921	170.064	-0.155713	0.314008	-0.495887	0.619974	0.821117	C12orf65
ENSG00000174206	51.9646	-0.265617	0.426808	-0.622334	0.533723	0.764679	C12orf66
ENSG00000204954	89.5207	-0.570145	0.34202	-1.66699	0.095516	0.281378	C12orf73
ENSG00000235162	167.713	0.0928811	0.294186	0.315723	0.752213	0.892567	C12orf75
ENSG00000174456	90.8992	-0.203568	0.356808	-0.570525	0.568322	0.787374	C12orf76
ENSG00000179933	861.842	0.51415	0.146261	3.51528	0.000439292	0.00657852	C14orf119
ENSG00000179008	11.9822	6.365	3.90928	1.62818	NA	NA	C14orf39
ENSG00000100802	82.1156	-0.630226	0.353334	-1.78365	0.0744798	0.239122	C14orf93
ENSG00000250021	41.4548	6.37618	3.86131	1.6513	NA	NA	C15orf38-AP3S2
ENSG00000167173	114.867	0.592386	0.324545	1.82528	0.0679585	0.2263	C15orf39
ENSG00000169609	111.984	0.0371672	0.28173	0.131925	0.895043	0.956926	C15orf40
ENSG00000186073	132.211	0.206553	0.303056	0.681566	0.495513	0.736434	C15orf41
ENSG00000166920	13.334	0.417792	0.779004	0.536316	0.59174	0.802951	C15orf48
ENSG00000189227	106.282	0.302792	0.299645	1.0105	0.312254	0.579208	C15orf61
ENSG00000166780	914.775	-0.0863154	0.158838	-0.543418	0.586842	0.799169	C16orf45
ENSG00000140688	644.025	-0.271427	0.288375	-0.941229	0.346587	0.613392	C16orf58
ENSG00000125149	319.21	-0.213055	0.198214	-1.07487	0.282431	0.547878	C16orf70
ENSG00000182831	514.389	0.979863	0.285571	3.43124	0.000600828	0.00833056	C16orf72
ENSG00000154102	39.1196	-0.700345	0.441938	-1.58471	0.113031	0.313736	C16orf74
ENSG00000155330	96.0695	0.944879	0.393331	2.40225	0.0162947	0.0867662	C16orf87
ENSG00000174109	132.456	0.53431	0.31382	1.7026	0.0886431	0.268002	C16orf91
ENSG00000260456	31.3907	0.291374	0.570106	0.511087	0.60929	0.813358	C16orf95
ENSG00000256806	35.2715	-0.413181	0.491248	-0.841084	0.400301	0.659577	C17orf100
ENSG00000258315	186.932	0.313611	0.514643	0.609375	0.542276	0.770195	C17orf49
ENSG00000212719	186.13	1.01128	0.24928	4.05679	4.98e-05	0.00119984	C17orf51
ENSG00000125319	107.223	0.235294	0.305931	0.769109	0.441829	0.695477	C17orf53
ENSG00000186665	133.401	0.161025	0.258639	0.622587	0.533556	0.764679	C17orf58
ENSG00000214226	48.7753	0.883391	0.40161	2.19962	0.0278336	0.125376	C17orf67
ENSG00000108666	241.036	-0.0434535	0.226466	-0.191876	0.847839	0.935534	C17orf75
ENSG00000141219	303.974	0.608553	0.343549	1.77137	0.0764993	0.243207	C17orf80
ENSG00000187624	80.4906	-0.25177	0.314264	-0.801143	0.423049	0.679359	C17orf97
ENSG00000141428	219.854	-0.261036	0.282645	-0.923547	0.355722	0.620987	C18orf21
ENSG00000152242	371.355	0.731844	0.234504	3.12082	0.00180349	0.0182683	C18orf25
ENSG00000177576	133.996	-0.694662	0.5059	-1.37312	0.169715	0.405814	C18orf32
ENSG00000166845	66.8225	0.829493	0.456916	1.81542	0.0694599	0.229372	C18orf54
ENSG00000131943	203.086	-0.351579	0.321898	-1.09221	0.274742	0.538792	C19orf12
ENSG00000228300	257.648	0.262386	0.22791	1.15127	0.249622	0.509591	C19orf24
ENSG00000119559	159.675	0.0909235	0.244537	0.371819	0.710027	0.872124	C19orf25
ENSG00000167644	863.099	0.0772795	0.209317	0.369198	0.71198	0.872723	C19orf33
ENSG00000105072	132.369	-0.0283342	0.277633	-0.102056	0.918712	0.967816	C19orf44
ENSG00000160392	137.614	-0.348102	0.266734	-1.30505	0.191875	0.436127	C19orf47
ENSG00000167747	651.637	0.0916783	0.252448	0.363157	0.716488	0.875066	C19orf48
ENSG00000104979	1092.36	0.00755645	0.161031	0.0469254	0.962573	0.986048	C19orf53
ENSG00000188493	84.2135	0.302072	0.361307	0.836053	0.403125	0.662371	C19orf54
ENSG00000132016	6.82211	-1.33075	1.94902	-0.682782	0.494745	0.736143	C19orf57
ENSG00000130813	265.585	-0.853475	0.266523	-3.20225	0.00136357	0.0150301	C19orf66
ENSG00000174917	354.014	-0.130916	0.283874	-0.461177	0.644672	0.837017	C19orf70
ENSG00000183397	10.1357	-0.675238	1.08646	-0.621501	0.53427	0.765214	C19orf71
ENSG00000221916	16.5572	0.0405543	0.618663	0.0655516	0.947735	0.98038	C19orf73
ENSG00000197223	150.311	0.371939	0.294495	1.26297	0.206599	0.455621	C1D
ENSG00000106392	131.677	0.902941	0.3055	2.95562	0.00312042	0.0272107	C1GALT1
ENSG00000171155	400.105	-0.545719	0.207246	-2.6332	0.00845853	0.0554025	C1GALT1C1
ENSG00000223658	43.4003	-0.438867	0.419541	-1.04606	0.295531	0.56237	C1GALT1C1L
ENSG00000116922	328.931	0.397153	0.247498	1.60468	0.108565	0.305979	C1orf109
ENSG00000000460	291.452	0.136804	0.247074	0.553695	0.579788	0.794002	C1orf112
ENSG00000162817	69.1009	-0.599784	0.39023	-1.537	0.124294	0.334027	C1orf115
ENSG00000197982	235	0.549986	0.240221	2.2895	0.0220506	0.106415	C1orf122
ENSG00000162384	309.178	-0.580725	0.210963	-2.75273	0.00591006	0.0432756	C1orf123
ENSG00000143633	203.02	0.069096	0.27674	0.249678	0.802836	0.914754	C1orf131
ENSG00000131591	69.0043	-0.718371	0.340566	-2.10935	0.0349148	0.145417	C1orf159
ENSG00000198912	444.478	0.463224	0.176321	2.62717	0.0086099	0.0560632	C1orf174
ENSG00000119280	289.276	0.337145	0.193798	1.73968	0.081916	0.254311	C1orf198
ENSG00000142686	539.987	-0.149466	0.178463	-0.837519	0.402301	0.661871	C1orf216
ENSG00000239887	336.45	0.738808	0.217533	3.3963	0.000683032	0.00925145	C1orf226
ENSG00000143793	329.978	-0.0652261	0.207012	-0.315084	0.752698	0.892588	C1orf35
ENSG00000143612	1350.12	0.134456	0.174419	0.770883	0.440776	0.694639	C1orf43
ENSG00000164008	146.379	-0.566765	0.295897	-1.91541	0.05544	0.199388	C1orf50
ENSG00000283580	10.7811	1.0212	1.4825	0.688837	0.490926	0.73324	C1orf50
ENSG00000162642	276.8	0.55632	0.237142	2.34594	0.0189792	0.0964929	C1orf52
ENSG00000143443	151.745	-0.259677	0.264492	-0.981794	0.326201	0.593618	C1orf56
ENSG00000162757	89.2828	-0.0048543	0.298948	-0.0162379	0.987045	0.996049	C1orf74
ENSG00000108561	5423.37	-0.110852	0.165391	-0.670241	0.502704	0.741658	C1QBP
ENSG00000186897	82.6354	-0.320552	0.362861	-0.883403	0.377019	0.63894	C1QL4
ENSG00000133466	176.882	-0.947995	0.28018	-3.38352	0.000715623	0.00953985	C1QTNF6
ENSG00000159403	89.8281	-2.11053	0.383435	-5.50427	3.71e-08	2.82e-06	C1R
ENSG00000139178	229.861	-1.42107	0.285055	-4.98525	6.19e-07	3.18e-05	C1RL
ENSG00000205885	151.678	-0.427303	0.307161	-1.39114	0.164183	0.3977	C1RL-AS1
ENSG00000182326	85.9792	-0.942934	0.334889	-2.81566	0.00486767	0.0375509	C1S
ENSG00000088854	219.379	0.527619	0.244206	2.16055	0.0307305	0.133764	C20orf194
ENSG00000101220	1067.9	0.035095	0.16826	0.208577	0.834779	0.929759	C20orf27
ENSG00000196476	140.118	-0.687569	0.32638	-2.10665	0.0351478	0.146049	C20orf96
ENSG00000160298	144.695	-0.518163	0.237023	-2.18613	0.0288064	0.128304	C21orf58
ENSG00000242259	254.251	-0.570414	0.259297	-2.19985	0.0278175	0.125336	C22orf39
ENSG00000184208	165.19	-0.287055	0.46895	-0.612121	0.540458	0.769071	C22orf46
ENSG00000157617	389.67	0.135795	0.199541	0.680535	0.496166	0.736934	C2CD2
ENSG00000172375	91.6723	0.634684	0.292876	2.16707	0.0302293	0.132265	C2CD2L
ENSG00000168014	242.928	0.224611	0.208227	1.07868	0.280731	0.545905	C2CD3
ENSG00000183186	96.6163	-0.928261	0.337319	-2.75188	0.00592547	0.0433163	C2CD4C
ENSG00000111731	490.981	-0.52289	0.175574	-2.97818	0.00289966	0.0259699	C2CD5
ENSG00000115998	86.8632	0.333645	0.409622	0.814519	0.415348	0.67319	C2orf42
ENSG00000135974	380.081	0.181603	0.185968	0.976527	0.328803	0.596335	C2orf49
ENSG00000168887	252.686	-0.534023	0.213862	-2.49705	0.0125232	0.0721633	C2orf68
ENSG00000178074	287.501	0.957281	0.328172	2.91701	0.00353402	0.0296712	C2orf69
ENSG00000204128	91.9764	-0.10832	0.326062	-0.332208	0.739732	0.886569	C2orf72
ENSG00000237651	53.5918	0.57962	0.547265	1.05912	0.289544	0.556486	C2orf74
ENSG00000186132	91.6364	-0.0797335	0.327982	-0.243103	0.807925	0.917059	C2orf76
ENSG00000284308	63.1824	-0.227856	0.34822	-0.654345	0.51289	0.749505	C2orf81
ENSG00000174928	29.6661	0.773772	0.564112	1.37167	0.170168	0.406428	C3orf33
ENSG00000179021	192.262	0.507942	0.264415	1.921	0.0547311	0.197745	C3orf38
ENSG00000114529	105.992	0.870165	0.336178	2.58841	0.00964212	0.0606722	C3orf52
ENSG00000164096	357.897	0.179943	0.246078	0.731244	0.46463	0.713276	C4orf3
ENSG00000205208	158.636	0.287755	0.29823	0.964877	0.334607	0.60192	C4orf46
ENSG00000243449	122.304	-0.369372	0.32048	-1.15256	0.249091	0.508922	C4orf48
ENSG00000106804	98.9798	0.200732	0.44685	0.449216	0.653276	0.841893	C5
ENSG00000113583	910.106	-0.326006	0.19405	-1.68001	0.0929555	0.276119	C5orf15
ENSG00000082213	473.033	0.187375	0.220874	0.848337	0.39625	0.656086	C5orf22
ENSG00000181904	267.866	-1.1529	0.982953	-1.17289	0.240839	0.499138	C5orf24
ENSG00000181751	236.196	0.409128	0.24617	1.66198	0.0965177	0.282819	C5orf30
ENSG00000172244	203.04	0.153764	0.251834	0.610578	0.541479	0.769603	C5orf34
ENSG00000205765	472.285	0.728982	0.362974	2.00836	0.0446052	0.172293	C5orf51
ENSG00000164241	30.6662	1.32054	0.921975	1.43229	0.152061	0.378119	C5orf63
ENSG00000224186	33.948	0.333065	0.575356	0.578885	0.562667	0.784168	C5orf66
ENSG00000196821	1605.23	0.229111	0.15608	1.46791	0.142128	0.363253	C6orf106
ENSG00000185127	487.764	0.245057	0.260821	0.939561	0.347443	0.614083	C6orf120
ENSG00000204564	131.05	0.00899571	0.367477	0.0244797	0.98047	0.993435	C6orf136
ENSG00000130349	122.928	0.0588687	0.319215	0.184417	0.853686	0.938197	C6orf203
ENSG00000221821	51.6416	0.278121	0.448771	0.619739	0.53543	0.766151	C6orf226
ENSG00000204439	174.466	0.401384	0.283202	1.41731	0.156393	0.38509	C6orf47
ENSG00000204387	886.484	-0.263187	0.165201	-1.59313	0.111132	0.310096	C6orf48
ENSG00000137434	29.0559	0.451489	0.614448	0.734789	0.462468	0.711841	C6orf52
ENSG00000112308	935.124	0.815562	0.241877	3.37181	0.000746773	0.00979777	C6orf62
ENSG00000198663	404.907	-0.319961	0.187123	-1.7099	0.0872849	0.26569	C6orf89
ENSG00000136197	122.85	0.0935708	0.503454	0.185858	0.852556	0.937855	C7orf25
ENSG00000146576	211.235	0.280222	0.283878	0.987122	0.323583	0.59083	C7orf26
ENSG00000146826	130.317	-0.146261	0.316612	-0.461958	0.644112	0.836827	C7orf43
ENSG00000146540	899.231	0.062667	0.153149	0.409191	0.6824	0.856887	C7orf50
ENSG00000269955	74.6359	0.214141	3.7281	0.0574398	0.954195	0.982764	C7orf55-LUC7L2
ENSG00000136275	19.3533	-0.887645	0.749207	-1.18478	0.236105	0.493046	C7orf69
ENSG00000177335	25.7279	-0.227358	0.550514	-0.412993	0.679612	0.855341	C8orf31
ENSG00000182307	416.178	0.356056	0.324603	1.0969	0.272686	0.536793	C8orf33
ENSG00000241852	111.134	-0.216018	0.308157	-0.700999	0.483304	0.727417	C8orf58
ENSG00000176731	260.757	-0.121081	0.269407	-0.449434	0.653118	0.841824	C8orf59
ENSG00000189376	97.8599	0.102633	0.339141	0.302627	0.762174	0.896349	C8orf76
ENSG00000213563	143.512	-0.682419	0.533967	-1.27802	0.201244	0.447639	C8orf82
ENSG00000160345	82.9526	-0.854192	0.328702	-2.59868	0.00935834	0.0595041	C9orf116
ENSG00000204352	31.6246	1.17976	3.71914	0.317212	0.751083	0.892006	C9orf129
ENSG00000171159	286.327	-0.170255	0.251059	-0.678146	0.497679	0.737998	C9orf16
ENSG00000196366	54.7222	-1.5438	0.628509	-2.45629	0.014038	0.0784494	C9orf163
ENSG00000148120	59.9204	0.527568	0.394252	1.33815	0.180847	0.421066	C9orf3
ENSG00000135045	382.492	0.263904	0.219557	1.20198	0.229371	0.483347	C9orf40
ENSG00000147894	59.3306	1.05328	0.40304	2.61334	0.00896629	0.0579332	C9orf72
ENSG00000136819	1156.71	0.28648	0.159966	1.79088	0.0733131	0.236984	C9orf78
ENSG00000155621	113.527	-0.277237	0.258411	-1.07285	0.283337	0.54897	C9orf85
ENSG00000063180	218.143	-1.79108	0.330827	-5.41394	6.17e-08	4.32e-06	CA11
ENSG00000169239	33.963	0.737918	0.609164	1.21136	0.225756	0.479018	CA5B
ENSG00000186312	116.894	1.02665	0.316075	3.24813	0.00116165	0.0134824	CA5BP1
ENSG00000120159	134.093	-0.329615	0.312042	-1.05631	0.290825	0.557602	CAAP1
ENSG00000135932	464.787	0.493173	0.316891	1.55629	0.11964	0.326005	CAB39
ENSG00000102547	141.715	0.442315	0.264429	1.67271	0.0943835	0.279089	CAB39L
ENSG00000099991	883.995	-0.298867	0.169661	-1.76156	0.0781444	0.246564	CABIN1
ENSG00000134508	76.1273	0.723949	0.42359	1.70908	0.0874362	0.266046	CABLES1
ENSG00000149679	200.587	-0.384689	0.239587	-1.60563	0.108355	0.305781	CABLES2
ENSG00000154040	112.188	0.144724	0.366639	0.394731	0.693042	0.863221	CABYR
ENSG00000160325	87.9397	-1.48233	0.330004	-4.49187	7.06e-06	0.000247752	CACFD1
ENSG00000158966	299.869	0.491986	0.274939	1.78944	0.0735442	0.237418	CACHD1
ENSG00000141837	86.4361	-2.11736	0.419827	-5.04341	4.57e-07	2.44e-05	CACNA1A
ENSG00000067191	95.8283	0.745235	0.392119	1.90054	0.0573629	0.20349	CACNB1
ENSG00000167535	130.638	-0.854652	0.311854	-2.74055	0.0061336	0.044418	CACNB3
ENSG00000075461	280.634	0.296203	0.271101	1.09259	0.274573	0.538637	CACNG4
ENSG00000130433	40.6854	0.506025	0.60776	0.832606	0.405067	0.663758	CACNG6
ENSG00000105605	67.6701	-0.816355	0.349235	-2.33755	0.0194107	0.0979909	CACNG7
ENSG00000105298	516.138	0.189708	0.21389	0.886939	0.375111	0.637635	CACTIN
ENSG00000226800	24.6255	-0.490258	0.595282	-0.823572	0.410183	0.668529	CACTIN-AS1
ENSG00000151893	571.196	0.420485	0.266741	1.57638	0.114939	0.317227	CACUL1
ENSG00000116161	2351.98	0.857006	0.215353	3.97953	6.91e-05	0.00154451	CACYBP
ENSG00000084774	1983.61	0.258057	0.175305	1.47204	0.141009	0.361171	CAD
ENSG00000175161	94.8242	-0.232978	0.419741	-0.555052	0.578859	0.79346	CADM2
ENSG00000105767	152.158	-0.747865	0.262617	-2.84774	0.00440308	0.0348954	CADM4
ENSG00000172137	339.505	0.210438	0.304376	0.691374	0.489331	0.73178	CALB2
ENSG00000012822	327.115	-0.604761	0.264006	-2.29071	0.0219804	0.106223	CALCOCO1
ENSG00000136436	913.882	-0.0850777	0.17858	-0.476412	0.633781	0.830477	CALCOCO2
ENSG00000122786	718.414	0.423739	0.253521	1.67142	0.0946392	0.279451	CALD1
ENSG00000198668	1583.37	0.326994	0.16282	2.00832	0.0446094	0.172293	CALM1
ENSG00000143933	3230.23	-0.320175	0.209747	-1.52648	0.12689	0.338418	CALM2
ENSG00000160014	3003.45	0.137643	0.250578	0.549304	0.582797	0.796436	CALM3
ENSG00000129007	28.5884	-0.490364	0.560885	-0.874268	0.381972	0.643675	CALML4
ENSG00000179218	6742.15	-0.576876	0.180794	-3.1908	0.00141879	0.015426	CALR
ENSG00000128595	1613.42	-0.154842	0.136625	-1.13334	0.257073	0.518703	CALU
ENSG00000134072	423.459	-0.711369	0.203039	-3.50361	0.000459	0.00677395	CAMK1
ENSG00000183049	125.494	-0.596674	0.2883	-2.06963	0.0384872	0.1553	CAMK1D
ENSG00000058404	64.0717	-0.83996	0.44839	-1.87328	0.0610298	0.211755	CAMK2B
ENSG00000145349	95.7987	0.0130844	0.349379	0.0374505	0.970126	0.989045	CAMK2D
ENSG00000148660	440.504	-0.469224	0.17627	-2.66196	0.00776864	0.0522813	CAMK2G
ENSG00000162545	106.136	2.19944	0.408259	5.38736	7.15e-08	4.93e-06	CAMK2N1
ENSG00000163888	26.2724	-0.0284405	0.604983	-0.0470104	0.962505	0.986048	CAMK2N2
ENSG00000004660	232.629	-0.875927	0.224075	-3.90909	9.26e-05	0.00194833	CAMKK1
ENSG00000110931	428.918	-0.32307	0.188861	-1.71062	0.0871518	0.265503	CAMKK2
ENSG00000143919	89.6151	0.162523	0.361504	0.449574	0.653018	0.841818	CAMKMT
ENSG00000164615	977.078	0.0585273	0.190339	0.307489	0.758471	0.894482	CAMLG
ENSG00000130559	608.743	0.473087	0.159615	2.96393	0.00303734	0.0267087	CAMSAP1
ENSG00000118200	694.062	0.587133	0.251287	2.3365	0.0194651	0.0981122	CAMSAP2
ENSG00000076826	125.051	0.338737	0.356096	0.951253	0.341476	0.609126	CAMSAP3
ENSG00000171735	300.58	0.232151	0.26888	0.8634	0.387918	0.648596	CAMTA1
ENSG00000108509	358.617	0.0129797	0.186583	0.0695653	0.94454	0.979249	CAMTA2
ENSG00000111530	1451.23	-0.0794504	0.170469	-0.466069	0.641166	0.835545	CAND1
ENSG00000171302	732.816	0.169231	0.178813	0.946409	0.34394	0.611298	CANT1
ENSG00000127022	7557.04	0.467431	0.203037	2.3022	0.0213239	0.104109	CANX
ENSG00000131236	6122.39	0.162382	0.173258	0.937229	0.348641	0.61458	CAP1
ENSG00000112186	375.276	-0.410828	0.199093	-2.0635	0.0390653	0.156841	CAP2
ENSG00000042493	1165.64	-0.43899	0.265846	-1.65129	0.0986784	0.28742	CAPG
ENSG00000014216	1302.06	-0.506238	0.151479	-3.34196	0.000831876	0.0105597	CAPN1
ENSG00000142330	201.62	0.122521	0.248804	0.49244	0.622408	0.822794	CAPN10
ENSG00000260942	83.5551	0.302715	0.292591	1.0346	0.300855	0.56705	CAPN10-DT
ENSG00000103326	613.69	0.354468	0.188532	1.88014	0.0600888	0.209596	CAPN15
ENSG00000162909	6367.83	0.954124	0.161682	5.90123	3.61e-09	3.82e-07	CAPN2
ENSG00000149260	118.214	-0.12179	0.351926	-0.346068	0.729292	0.882124	CAPN5
ENSG00000131375	297.612	-0.0118692	0.226272	-0.0524556	0.958166	0.984778	CAPN7
ENSG00000126247	3509.24	-0.411264	0.32351	-1.27126	0.203638	0.451299	CAPNS1
ENSG00000135387	3310.32	0.40297	0.180614	2.2311	0.0256743	0.118628	CAPRIN1
ENSG00000110888	1593.26	0.00332983	0.181104	0.0183863	0.985331	0.995735	CAPRIN2
ENSG00000105519	20.3285	-1.74986	0.655587	-2.66915	0.00760429	0.0515187	CAPS
ENSG00000180881	39.7234	-0.382489	0.452269	-0.845712	0.397713	0.657426	CAPS2
ENSG00000116489	2600.58	0.0622289	0.27786	0.223958	0.82279	0.923603	CAPZA1
ENSG00000198898	919.446	0.509257	0.303939	1.67553	0.0938311	0.278045	CAPZA2
ENSG00000077549	1793.71	-0.0598034	0.144677	-0.413357	0.679345	0.855235	CAPZB
ENSG00000100065	219.503	-0.0160645	0.221999	-0.0723627	0.942313	0.97881	CARD10
ENSG00000204397	400.799	-1.07886	0.292511	-3.68827	0.000225784	0.00393801	CARD16
ENSG00000255221	49.3352	1.31789	0.504098	2.61436	0.0089396	0.0577983	CARD17
ENSG00000165233	333.404	-0.299788	0.222634	-1.34655	0.178125	0.417325	CARD19
ENSG00000105483	216.497	0.139815	0.206914	0.675716	0.499221	0.739286	CARD8
ENSG00000153048	287.569	-0.734677	0.365403	-2.0106	0.0443682	0.171622	CARHSP1
ENSG00000142453	1214.58	0.0145314	0.175641	0.0827337	0.934063	0.975222	CARM1
ENSG00000079691	59.3193	-0.0330811	0.402926	-0.0821021	0.934566	0.975317	CARMIL1
ENSG00000159753	44.2666	0.60754	0.524895	1.15745	0.247088	0.506985	CARMIL2
ENSG00000156017	187.48	0.956361	0.296369	3.22692	0.0012513	0.0142297	CARNMT1
ENSG00000110619	746.3	0.500075	0.163876	3.05154	0.0022767	0.0217101	CARS
ENSG00000134905	733.753	-0.0324315	0.18172	-0.17847	0.858354	0.940642	CARS2
ENSG00000204682	102.942	-0.35978	0.279949	-1.28517	0.198735	0.443958	CASC10
ENSG00000108349	580.168	0.258038	0.222101	1.16181	0.245314	0.504784	CASC3
ENSG00000166734	337.556	-1.05268	0.212327	-4.95782	7.13e-07	3.54e-05	CASC4
ENSG00000246228	37.031	-0.307433	0.500559	-0.614179	0.539097	0.768434	CASC8
ENSG00000127995	109.79	0.117336	0.372894	0.314662	0.753018	0.892588	CASD1
ENSG00000147044	277.648	0.255171	0.203353	1.25482	0.209545	0.458919	CASK
ENSG00000167971	67.1308	-1.55161	0.546152	-2.84098	0.00449745	0.0354254	CASKIN1
ENSG00000177303	150.87	0.380109	0.289286	1.31396	0.188861	0.431958	CASKIN2
ENSG00000137752	71.1477	-1.45823	0.337782	-4.31709	1.58e-05	0.000479982	CASP1
ENSG00000003400	131.955	-0.683318	0.251323	-2.71889	0.00655017	0.0463228	CASP10
ENSG00000106144	236.72	0.392034	0.291229	1.34614	0.178258	0.417465	CASP2
ENSG00000164305	321.961	1.33622	0.391542	3.41271	0.000643203	0.00877962	CASP3
ENSG00000196954	766.761	0.46821	0.165531	2.82854	0.00467612	0.0363765	CASP4
ENSG00000138794	65.1227	-0.240221	0.333413	-0.720491	0.471223	0.71814	CASP6
ENSG00000165806	249.351	-0.218538	0.221921	-0.984755	0.324744	0.591947	CASP7
ENSG00000064012	629.88	0.422839	0.188291	2.24567	0.0247252	0.115426	CASP8
ENSG00000118412	351.099	0.253452	0.280156	0.904682	0.365634	0.629353	CASP8AP2
ENSG00000132906	141.206	-0.490983	0.273003	-1.79845	0.0721053	0.234625	CASP9
ENSG00000153113	2510.89	0.669434	0.156402	4.28022	1.87e-05	0.000548924	CAST
ENSG00000239282	155.265	-0.979384	0.502369	-1.94953	0.0512321	0.188987	CASTOR1
ENSG00000239521	77.5421	-0.522946	0.413095	-1.26592	0.205541	0.454028	CASTOR3
ENSG00000130940	203.112	0.441011	0.370731	1.18957	0.234216	0.490558	CASZ1
ENSG00000121691	273.707	-0.500391	0.21749	-2.30075	0.0214056	0.104355	CAT
ENSG00000105974	890.581	0.528421	0.333617	1.58392	0.113213	0.313943	CAV1
ENSG00000105971	254.899	0.947043	0.240516	3.93755	8.23e-05	0.00177071	CAV2
ENSG00000177469	4171.06	0.176224	0.192255	0.916616	0.359344	0.624027	CAVIN1
ENSG00000168497	1123.61	0.218852	0.232019	0.94325	0.345553	0.612639	CAVIN2
ENSG00000170955	184.79	0.856741	0.241836	3.54265	0.000396127	0.00602449	CAVIN3
ENSG00000099625	119.916	0.16617	0.331769	0.500861	0.616469	0.818344	CBARP
ENSG00000078699	262.715	-0.111902	0.359062	-0.31165	0.755306	0.893204	CBFA2T2
ENSG00000129993	88.3113	-0.139061	0.319742	-0.434918	0.663622	0.847571	CBFA2T3
ENSG00000067955	390.67	0.325674	0.399964	0.814259	0.415496	0.67319	CBFB
ENSG00000110395	379.711	0.652766	0.409664	1.59342	0.111067	0.310094	CBL
ENSG00000105879	267.545	0.483129	0.342128	1.41213	0.157913	0.38753	CBLL1
ENSG00000159228	1292.43	-0.621329	0.20448	-3.03857	0.00237701	0.0224267	CBR1
ENSG00000159231	228.742	-0.730956	0.216832	-3.37107	0.000748775	0.00981302	CBR3
ENSG00000145439	109.378	0.194686	0.383613	0.507506	0.6118	0.815037	CBR4
ENSG00000160200	1046.15	-0.503616	0.231922	-2.17149	0.0298943	0.131458	CBS
ENSG00000274276	942.36	-0.471183	0.224399	-2.09975	0.0357506	0.147855	CBSL
ENSG00000172785	422.122	0.6245	0.174458	3.57967	0.000344032	0.0054246	CBWD1
ENSG00000136682	411.129	0.33692	0.192134	1.75357	0.0795046	0.248802	CBWD2
ENSG00000215126	196.88	0.21987	0.291308	0.754771	0.450387	0.703281	CBWD2
ENSG00000147996	183.818	0.526733	0.259207	2.0321	0.042144	0.165868	CBWD5
ENSG00000196873	216.318	0.415862	0.249619	1.66599	0.0957162	0.281618	CBWD5
ENSG00000108468	1753.97	0.184711	0.191099	0.966571	0.333759	0.601149	CBX1
ENSG00000173894	533.771	-0.123229	0.169034	-0.729019	0.46599	0.713639	CBX2
ENSG00000122565	2436.24	0.491082	0.216839	2.26473	0.0235292	0.111501	CBX3
ENSG00000141582	349.618	-0.228476	0.190071	-1.20206	0.229341	0.483347	CBX4
ENSG00000094916	518.706	0.222551	0.32019	0.695061	0.487017	0.730049	CBX5
ENSG00000183741	878.931	0.286789	0.20877	1.37371	0.169531	0.405623	CBX6
ENSG00000100307	281.338	-0.80819	0.246203	-3.28262	0.00102845	0.0122385	CBX7
ENSG00000141570	154.268	-0.630795	0.244049	-2.58471	0.0097461	0.0610979	CBX8
ENSG00000100211	204.201	0.135988	0.21771	0.624628	0.532215	0.763515	CBY1
ENSG00000132024	372.32	-0.586907	0.247104	-2.37514	0.0175421	0.0910295	CC2D1A
ENSG00000154222	344.447	0.298146	0.208208	1.43197	0.152153	0.378119	CC2D1B
ENSG00000060339	1387.91	0.450498	0.182318	2.47094	0.0134758	0.0759896	CCAR1
ENSG00000158941	1425.18	0.0745342	0.141776	0.525716	0.599085	0.807689	CCAR2
ENSG00000254166	578.72	2.48145	0.235476	10.538	5.77e-26	1.69e-22	CCAT1
ENSG00000135736	181.985	-0.583304	0.229111	-2.54595	0.0108982	0.0660691	CCDC102A
ENSG00000167131	29.2846	-1.65699	0.595379	-2.78308	0.00538453	0.0405419	CCDC103
ENSG00000173581	175.113	-0.55284	0.251077	-2.20187	0.0276745	0.12486	CCDC106
ENSG00000159884	60.5371	-0.0788306	0.413824	-0.190493	0.848923	0.935972	CCDC107
ENSG00000164221	221.819	0.806895	0.296699	2.71958	0.00653654	0.046245	CCDC112
ENSG00000103021	180.111	0.305703	0.268075	1.14036	0.254135	0.515521	CCDC113
ENSG00000136710	161.85	-0.628818	0.295704	-2.12651	0.0334609	0.141515	CCDC115
ENSG00000159873	405.807	0.141851	0.364915	0.388723	0.697481	0.864903	CCDC117
ENSG00000160799	214.674	-0.114869	0.244042	-0.470692	0.63786	0.833771	CCDC12
ENSG00000176714	31.9897	-0.0725192	0.56364	-0.128662	0.897625	0.958175	CCDC121
ENSG00000151773	31.043	0.640341	0.614663	1.04178	0.297516	0.564375	CCDC122
ENSG00000007080	1458.12	-0.0195888	0.184703	-0.106055	0.915539	0.9665	CCDC124
ENSG00000183323	108.845	0.185085	0.275493	0.671832	0.501691	0.740933	CCDC125
ENSG00000169193	34.2712	-0.188345	0.574949	-0.327585	0.743225	0.888052	CCDC126
ENSG00000164366	420.501	-0.0374761	0.16834	-0.222622	0.82383	0.924054	CCDC127
ENSG00000280571	28.8897	-1.83714	1.14478	-1.60479	0.10854	0.305979	CCDC13
ENSG00000104957	336.274	-0.352117	0.239518	-1.4701	0.141533	0.362198	CCDC130
ENSG00000100147	30.828	0.519723	0.500552	1.0383	0.29913	0.565606	CCDC134
ENSG00000128596	124.057	-0.337566	0.285028	-1.18433	0.236284	0.493245	CCDC136
ENSG00000185298	267.164	-0.519704	0.481705	-1.07888	0.280639	0.545787	CCDC137
ENSG00000163006	131.049	0.489988	0.344659	1.42166	0.155125	0.383202	CCDC138
ENSG00000175455	435.497	-0.128203	0.172634	-0.742629	0.457707	0.708794	CCDC14
ENSG00000135637	134.564	1.14025	0.3701	3.08092	0.00206363	0.0201896	CCDC142
ENSG00000149548	90.2759	1.60377	0.570627	2.81055	0.00494576	0.0379866	CCDC15
ENSG00000144395	103.71	0.314963	0.301193	1.04572	0.295691	0.562442	CCDC150
ENSG00000198937	91.3562	0.0447301	0.286867	0.155926	0.876091	0.949544	CCDC167
ENSG00000154781	105.596	0.558106	0.295386	1.88941	0.0588367	0.206882	CCDC174
ENSG00000122483	154.213	0.875434	0.366497	2.38865	0.0169104	0.088799	CCDC18
ENSG00000213213	29.2133	-0.848372	0.534339	-1.5877	0.112353	0.312496	CCDC183
ENSG00000165813	188.855	0.767337	0.349364	2.19639	0.0280643	0.126092	CCDC186
ENSG00000196118	33.1632	-0.766632	0.478525	-1.60207	0.109139	0.306955	CCDC189
ENSG00000223745	91.926	-0.900008	0.378185	-2.37981	0.0173217	0.090152	CCDC18-AS1
ENSG00000185860	322.726	-0.0632436	0.252867	-0.250106	0.802506	0.914607	CCDC190
ENSG00000101997	317.091	0.0320679	0.184102	0.174185	0.86172	0.942418	CCDC22
ENSG00000159214	52.0634	-1.23205	0.426343	-2.8898	0.00385486	0.0315808	CCDC24
ENSG00000147419	692.266	0.152908	0.172405	0.886916	0.375124	0.637635	CCDC25
ENSG00000024862	171.347	0.253436	0.230737	1.09837	0.272041	0.536124	CCDC28A
ENSG00000160050	116.021	-0.725687	0.31441	-2.30809	0.020994	0.103158	CCDC28B
ENSG00000151468	123.172	-0.299823	0.266638	-1.12446	0.260819	0.522805	CCDC3
ENSG00000128891	92.1321	0.210244	0.387655	0.542348	0.587579	0.799553	CCDC32
ENSG00000140481	65.3274	-0.677105	0.395791	-1.71076	0.0871247	0.265466	CCDC33
ENSG00000109881	219.935	-0.226903	0.271659	-0.835249	0.403578	0.662431	CCDC34
ENSG00000141519	60.7093	-0.752152	0.350722	-2.14458	0.0319861	0.137373	CCDC40
ENSG00000180329	435.227	0.0413193	0.208075	0.198578	0.842592	0.933612	CCDC43
ENSG00000108588	1332.65	0.611632	0.19615	3.11818	0.00181972	0.0183971	CCDC47
ENSG00000152492	787.396	0.471743	0.193691	2.43554	0.0148695	0.0815668	CCDC50
ENSG00000164051	210.326	-0.232778	0.20421	-1.1399	0.25433	0.515551	CCDC51
ENSG00000176155	320.801	-0.900745	0.24729	-3.64246	0.000270047	0.00448743	CCDC57
ENSG00000160124	242.238	0.571911	0.298222	1.91774	0.0551443	0.198707	CCDC58
ENSG00000133773	273.822	0.810123	0.28682	2.8245	0.00473541	0.0367078	CCDC59
ENSG00000108091	657.293	0.643693	0.233771	2.75352	0.00589582	0.0432434	CCDC6
ENSG00000104983	48.6828	0.0622399	0.472503	0.131724	0.895203	0.956926	CCDC61
ENSG00000180376	156.617	0.309352	0.322987	0.957786	0.338171	0.605395	CCDC66
ENSG00000166510	287.28	0.230807	0.272541	0.846873	0.397066	0.656729	CCDC68
ENSG00000198624	54.3544	-0.53011	0.411173	-1.28926	0.197306	0.442378	CCDC69
ENSG00000177352	174.98	-0.549254	0.267974	-2.04965	0.0403987	0.160739	CCDC71
ENSG00000253276	1310.93	0.942109	0.37102	2.53924	0.0111094	0.0668196	CCDC71L
ENSG00000163040	335.746	-1.03331	0.219277	-4.71234	2.45e-06	0.000102508	CCDC74A
ENSG00000152076	335.751	-1.10685	0.23509	-4.70821	2.5e-06	0.000103865	CCDC74B
ENSG00000120647	477.674	0.151988	0.200123	0.759476	0.447568	0.700747	CCDC77
ENSG00000162004	50.9266	-1.32802	0.4016	-3.30683	0.000943569	0.0115201	CCDC78
ENSG00000149231	183.03	0.390222	0.261882	1.49007	0.136206	0.353713	CCDC82
ENSG00000186166	59.7433	1.068	0.412766	2.58741	0.00967001	0.060739	CCDC84
ENSG00000175602	810.614	-0.0971518	0.187482	-0.518192	0.604324	0.810656	CCDC85B
ENSG00000205476	666.52	0.357179	0.204066	1.75031	0.0800653	0.250156	CCDC85C
ENSG00000110104	461.937	1.0066	0.179718	5.60101	2.13e-08	1.76e-06	CCDC86
ENSG00000115355	631.476	0.259502	0.207132	1.25283	0.210267	0.459785	CCDC88A
ENSG00000168071	51.7283	-1.19943	0.497485	-2.41099	0.0159091	0.0854042	CCDC88B
ENSG00000015133	194.998	0.21852	0.265046	0.824458	0.409679	0.668204	CCDC88C
ENSG00000105321	181.655	0.793624	0.267663	2.96501	0.00302673	0.0266597	CCDC9
ENSG00000137500	303.758	0.282825	0.226287	1.24985	0.211355	0.460849	CCDC90B
ENSG00000123106	311.165	0.607016	0.224957	2.69837	0.00696805	0.0482879	CCDC91
ENSG00000119242	195.755	-0.798963	0.285791	-2.79562	0.00517998	0.0393959	CCDC92
ENSG00000125633	568.718	0.551405	0.174334	3.16292	0.00156196	0.0164534	CCDC93
ENSG00000142039	352.259	0.171534	0.19765	0.867867	0.385467	0.64663	CCDC97
ENSG00000188549	334.223	0.148963	0.257479	0.578544	0.562897	0.784168	CCDC9B
ENSG00000204536	375.451	-0.366153	0.183933	-1.99069	0.0465146	0.177353	CCHCR1
ENSG00000271503	23.2413	-1.97464	0.842503	-2.34378	0.0190895	0.0969362	CCL5
ENSG00000136280	680.142	-0.279143	0.177699	-1.57088	0.116212	0.319586	CCM2
ENSG00000101331	109.064	-0.708044	0.445297	-1.59005	0.111824	0.311368	CCM2L
ENSG00000145386	1123.6	0.453389	0.228618	1.98317	0.0473488	0.179576	CCNA2
ENSG00000134057	3983.47	0.585215	0.170333	3.43571	0.000591004	0.00825949	CCNB1
ENSG00000100814	367.121	-0.431439	0.258458	-1.66928	0.095062	0.28041	CCNB1IP1
ENSG00000157456	1298.65	0.238797	0.129132	1.84924	0.064423	0.219241	CCNB2
ENSG00000112237	719.957	0.336802	0.244144	1.37952	0.167735	0.402752	CCNC
ENSG00000110092	1030.95	0.494936	0.224144	2.20812	0.0272362	0.12354	CCND1
ENSG00000112576	368.116	0.284358	0.263488	1.07921	0.280495	0.545566	CCND3
ENSG00000166946	353.702	-0.0719963	0.191176	-0.376598	0.706472	0.870835	CCNDBP1
ENSG00000105173	305.925	-0.069321	0.237606	-0.291748	0.770479	0.89925	CCNE1
ENSG00000175305	76.2321	0.994538	0.527568	1.88514	0.0594113	0.208029	CCNE2
ENSG00000162063	386.599	0.108565	0.22364	0.485448	0.627358	0.825831	CCNF
ENSG00000113328	1531.82	-0.650264	0.255841	-2.54167	0.0110325	0.0665417	CCNG1
ENSG00000138764	173.85	-0.318916	0.356996	-0.893334	0.371679	0.635403	CCNG2
ENSG00000134480	701.622	0.164045	0.178518	0.91893	0.358132	0.623116	CCNH
ENSG00000118816	1291.37	0.281624	0.218628	1.28814	0.197697	0.442591	CCNI
ENSG00000107443	209.123	0.852524	0.270289	3.15412	0.00160984	0.0168723	CCNJ
ENSG00000090061	293.553	0.571869	0.195684	2.92242	0.00347326	0.029273	CCNK
ENSG00000163660	735.44	0.0885419	0.237413	0.372946	0.709189	0.871804	CCNL1
ENSG00000221978	1230.29	-1.23924	0.205073	-6.04291	1.51e-09	1.84e-07	CCNL2
ENSG00000152669	81.951	-0.266384	0.333949	-0.797679	0.425057	0.680727	CCNO
ENSG00000262919	404.462	-0.545491	0.227659	-2.39609	0.016571	0.0876724	CCNQ
ENSG00000129315	489.492	0.479563	0.210889	2.274	0.0229658	0.109569	CCNT1
ENSG00000082258	327.265	0.0458996	0.250381	0.183319	0.854548	0.938621	CCNT2
ENSG00000108100	681.292	0.392436	0.192509	2.03853	0.041497	0.164093	CCNY
ENSG00000163249	233.67	0.635679	0.317927	1.99945	0.0455596	0.174905	CCNYL1
ENSG00000103540	207.065	0.0526425	0.341557	0.154125	0.877511	0.950088	CCP110
ENSG00000260916	224.232	-0.315374	0.297794	-1.05903	0.289584	0.556486	CCPG1
ENSG00000173992	240.353	-0.403081	0.25107	-1.60545	0.108395	0.305839	CCS
ENSG00000154429	303.693	0.443812	0.326991	1.35726	0.174698	0.41276	CCSAP
ENSG00000107771	383.445	0.630178	0.33255	1.89498	0.0580944	0.205257	CCSER2
ENSG00000166226	3623.91	0.529256	0.152426	3.47221	0.000516194	0.00744339	CCT2
ENSG00000163468	10363	0.062018	0.116196	0.533736	0.593524	0.804084	CCT3
ENSG00000115484	5485.27	0.357286	0.171061	2.08865	0.0367394	0.150657	CCT4
ENSG00000150753	11476.2	0.199297	0.181986	1.09512	0.273463	0.53766	CCT5
ENSG00000146731	6879.05	0.548535	0.176428	3.10911	0.00187652	0.0188091	CCT6A
ENSG00000132141	29.8709	-0.489717	0.463288	-1.05705	0.29049	0.557362	CCT6B
ENSG00000228409	84.3845	0.598492	0.362459	1.6512	0.0986977	0.287428	CCT6P1
ENSG00000234585	78.6602	0.297323	0.355218	0.837016	0.402583	0.662035	CCT6P3
ENSG00000135624	6342.78	0.0739399	0.127928	0.577981	0.563277	0.784258	CCT7
ENSG00000156261	4115.28	0.382118	0.1753	2.17979	0.0292731	0.129628	CCT8
ENSG00000122674	1121.68	0.241096	0.165972	1.45263	0.146326	0.370091	CCZ1
ENSG00000146574	869.158	0.249941	0.21259	1.17569	0.239718	0.497577	CCZ1B
ENSG00000156535	952.255	0.57859	0.290508	1.99165	0.0464094	0.177105	CD109
ENSG00000170458	98.2123	-2.23408	0.359336	-6.21725	5.06e-10	6.64e-08	CD14
ENSG00000177697	1552.26	-0.646076	0.180903	-3.57139	0.000355094	0.00554219	CD151
ENSG00000135535	1551.16	0.0803279	0.213664	0.375955	0.70695	0.870919	CD164
ENSG00000012124	27.2087	1.88801	0.58513	3.22665	0.00125247	0.0142338	CD22
ENSG00000120217	59.3616	2.60678	0.419237	6.21792	5.04e-10	6.64e-08	CD274
ENSG00000103855	295.085	-0.340368	0.330028	-1.03133	0.302386	0.568947	CD276
ENSG00000215039	171.654	-1.18399	0.305594	-3.87439	0.000106892	0.00217507	CD27-AS1
ENSG00000198087	514.143	0.651541	0.296946	2.19414	0.0282254	0.126654	CD2AP
ENSG00000169217	1066.1	0.13879	0.137425	1.00993	0.312527	0.57941	CD2BP2
ENSG00000167775	825.404	-0.734423	0.234254	-3.13516	0.00171762	0.0177061	CD320
ENSG00000104894	38.832	-1.67915	0.553557	-3.03339	0.00241824	0.0227232	CD37
ENSG00000117877	178.13	1.3784	0.49591	2.77954	0.00544363	0.040847	CD3EAP
ENSG00000101017	103.936	-0.63735	0.291962	-2.18299	0.0290363	0.129106	CD40
ENSG00000026508	5038.53	-0.752014	0.157166	-4.78483	1.71e-06	7.48e-05	CD44
ENSG00000117335	1011.02	-0.33853	0.175243	-1.93177	0.0533881	0.194456	CD46
ENSG00000196776	381.702	0.0701591	0.206108	0.340399	0.733556	0.883627	CD47
ENSG00000196352	287.558	1.86124	0.239954	7.75666	8.72e-15	3.13e-12	CD55
ENSG00000116815	167.644	-0.326321	0.249058	-1.31022	0.190122	0.433655	CD58
ENSG00000085063	614.265	0.538198	0.161632	3.32977	0.000869177	0.0108839	CD59
ENSG00000135404	1370.84	0.117098	0.186756	0.627013	0.530651	0.762328	CD63
ENSG00000129226	177.791	0.864713	0.281531	3.07147	0.00213007	0.0206785	CD68
ENSG00000110651	666.583	-0.480233	0.149011	-3.22281	0.00126939	0.0143519	CD81
ENSG00000085117	95.9162	-0.326753	0.329444	-0.991831	0.32128	0.588934	CD82
ENSG00000112149	103.477	0.413215	0.311818	1.32518	0.185112	0.426539	CD83
ENSG00000010278	1701.38	0.253411	0.136374	1.85821	0.0631392	0.216572	CD9
ENSG00000002586	1080.34	-0.397391	0.194309	-2.04514	0.0408406	0.161908	CD99
ENSG00000102181	532.509	-0.476994	0.173295	-2.75249	0.00591435	0.043289	CD99L2
ENSG00000102543	70.5397	0.467286	0.361529	1.29253	0.196174	0.441148	CDADC1
ENSG00000140326	265.387	-0.0784217	0.21031	-0.372886	0.709233	0.871804	CDAN1
ENSG00000151465	1358.13	0.579418	0.184974	3.13242	0.00173373	0.0178249	CDC123
ENSG00000079335	77.9983	-0.0716594	0.353386	-0.202779	0.839308	0.931969	CDC14A
ENSG00000081377	156.96	0.0739233	0.234361	0.315425	0.752439	0.892588	CDC14B
ENSG00000130177	678.857	0.177154	0.181598	0.975531	0.329297	0.596904	CDC16
ENSG00000117399	3339.38	0.777209	0.156193	4.97596	6.49e-07	3.29e-05	CDC20
ENSG00000094880	989.869	-0.202496	0.188471	-1.07442	0.282636	0.548011	CDC23
ENSG00000164045	245.61	0.933427	0.286308	3.26021	0.00111328	0.013014	CDC25A
ENSG00000101224	1549.15	-0.397247	0.277054	-1.43382	0.151623	0.377381	CDC25B
ENSG00000158402	458.164	-0.0743056	0.167386	-0.443917	0.657103	0.844421	CDC25C
ENSG00000176386	268.603	0.173179	0.221392	0.782229	0.43408	0.688893	CDC26
ENSG00000004897	1070.29	0.674337	0.239963	2.81016	0.00495161	0.0380017	CDC27
ENSG00000099804	717.399	0.129634	0.151969	0.853027	0.393644	0.653414	CDC34
ENSG00000105401	2375.56	0.0294649	0.227779	0.129357	0.897075	0.958004	CDC37
ENSG00000106993	173.205	0.533894	0.283587	1.88264	0.0597488	0.208836	CDC37L1
ENSG00000273061	18.8759	-0.74798	0.621805	-1.20292	0.229008	0.482993	CDC37L1-DT
ENSG00000168438	404.448	0.0912158	0.268013	0.340341	0.7336	0.883627	CDC40
ENSG00000070831	1883.84	0.0916492	0.210371	0.435655	0.663087	0.847413	CDC42
ENSG00000143776	640.928	0.511415	0.204626	2.49927	0.0124449	0.0719094	CDC42BPA
ENSG00000198752	1422.11	0.20157	0.150735	1.33725	0.181142	0.421419	CDC42BPB
ENSG00000128283	523.766	0.989235	0.213748	4.62805	3.69e-06	0.00014311	CDC42EP1
ENSG00000149798	59.2566	1.14326	1.40251	0.815148	0.414988	0.67319	CDC42EP2
ENSG00000163171	1116.98	0.187542	0.22001	0.852421	0.393981	0.653709	CDC42EP3
ENSG00000179604	450.614	-0.160627	0.193731	-0.829126	0.407033	0.665326	CDC42EP4
ENSG00000167617	15.9184	-3.11798	1.13965	-2.73592	0.00622059	0.0447847	CDC42EP5
ENSG00000197622	632.278	-0.421808	0.199811	-2.11104	0.0347692	0.145197	CDC42SE1
ENSG00000158985	385.344	0.120911	0.402365	0.3005	0.763796	0.896455	CDC42SE2
ENSG00000093009	580.269	-0.222879	0.162287	-1.37336	0.16964	0.40572	CDC45
ENSG00000096401	947.488	0.560351	0.212702	2.63445	0.00842744	0.055264	CDC5L
ENSG00000094804	768.078	-0.050843	0.206964	-0.245661	0.805945	0.916295	CDC6
ENSG00000097046	200.788	-0.0346408	0.280762	-0.123381	0.901805	0.960029	CDC7
ENSG00000134371	631.273	0.462603	0.236873	1.95296	0.0508249	0.187998	CDC73
ENSG00000184661	680.966	0.889469	0.262785	3.38478	0.00071235	0.00952383	CDCA2
ENSG00000111665	658.515	-0.286754	0.203331	-1.41028	0.158457	0.388539	CDCA3
ENSG00000170779	519.816	-0.561484	0.379916	-1.47792	0.13943	0.358748	CDCA4
ENSG00000146670	596.567	0.487105	0.39897	1.2209	0.222122	0.473981	CDCA5
ENSG00000144354	861.617	-0.317494	0.143331	-2.21511	0.0267523	0.121957	CDCA7
ENSG00000164649	505.361	-0.0640354	0.226321	-0.282941	0.777222	0.902353	CDCA7L
ENSG00000134690	1374.81	0.293898	0.19824	1.48253	0.138199	0.35678	CDCA8
ENSG00000163814	2176.16	2.38885	0.249514	9.57402	1.03e-21	1.21e-18	CDCP1
ENSG00000139880	89.2772	-1.06584	0.330507	-3.22487	0.00126029	0.0142994	CDH24
ENSG00000179776	155.838	-1.40218	0.294735	-4.75741	1.96e-06	8.47e-05	CDH5
ENSG00000128536	19.1395	0.63282	0.627706	1.00815	0.313384	0.580263	CDHR3
ENSG00000089486	38.2865	0.756323	0.772347	0.979253	0.327455	0.594853	CDIP1
ENSG00000103502	381.389	-0.55609	0.284155	-1.957	0.0503479	0.186705	CDIPT
ENSG00000170312	743.505	0.37535	0.281127	1.33516	0.181825	0.422559	CDK1
ENSG00000185324	338.186	-0.737205	0.285653	-2.58078	0.00985786	0.0616546	CDK10
ENSG00000008128	491.129	0.262615	0.159189	1.64971	0.0990026	0.287906	CDK11A
ENSG00000248333	847.234	0.25127	0.137645	1.82549	0.0679276	0.2263	CDK11B
ENSG00000167258	1132.28	0.0968517	0.211409	0.458125	0.646863	0.838542	CDK12
ENSG00000065883	565.322	0.22765	0.197718	1.15139	0.249571	0.509548	CDK13
ENSG00000102225	2947.23	-0.279642	0.183151	-1.52684	0.126801	0.338418	CDK16
ENSG00000059758	154.383	1.16729	0.303696	3.84363	0.00012123	0.00239746	CDK17
ENSG00000117266	30.8096	-1.39239	0.565138	-2.46381	0.0137469	0.0770922	CDK18
ENSG00000155111	313.692	0.19774	0.28473	0.694483	0.487379	0.730363	CDK19
ENSG00000123374	333.211	-0.002177	0.231657	-0.00939755	0.992502	0.997946	CDK2
ENSG00000156345	137.566	-1.16316	0.412454	-2.82009	0.00480098	0.0371016	CDK20
ENSG00000111328	632.876	-0.819411	0.207357	-3.9517	7.76e-05	0.00169264	CDK2AP1
ENSG00000167797	178.62	-0.186764	0.235541	-0.792913	0.427829	0.683228	CDK2AP2
ENSG00000250506	13.9065	0.398569	1.32806	0.300113	0.764091	0.896582	CDK3
ENSG00000135446	1067.61	-0.308705	0.163322	-1.89015	0.0587374	0.206599	CDK4
ENSG00000164885	273.794	-0.644501	0.210184	-3.06636	0.00216683	0.020989	CDK5
ENSG00000176749	62.0661	0.318451	0.360977	0.882191	0.377674	0.639434	CDK5R1
ENSG00000101391	443.313	-0.0653921	0.200921	-0.325461	0.744832	0.888753	CDK5RAP1
ENSG00000136861	729.696	0.167646	0.159812	1.04902	0.29417	0.561177	CDK5RAP2
ENSG00000108465	736.741	-0.469597	0.177948	-2.63896	0.00831611	0.0548817	CDK5RAP3
ENSG00000105810	179.467	1.10628	0.328561	3.36706	0.000759743	0.00988473	CDK6
ENSG00000134058	605.256	0.42874	0.306724	1.3978	0.162172	0.394243	CDK7
ENSG00000132964	417.191	0.643026	0.17451	3.68476	0.000228921	0.00397694	CDK8
ENSG00000136807	464.382	-0.408431	0.182321	-2.24018	0.0250794	0.11666	CDK9
ENSG00000145996	108.527	0.88139	0.591792	1.48936	0.136393	0.35399	CDKAL1
ENSG00000100490	38.5626	1.48081	0.508697	2.911	0.00360277	0.0300347	CDKL1
ENSG00000006837	24.6984	0.812486	0.790896	1.0273	0.30428	0.570491	CDKL3
ENSG00000124762	101.206	2.18954	0.404073	5.41868	6e-08	4.24e-06	CDKN1A
ENSG00000111276	549.183	0.0169189	0.253718	0.0666839	0.946833	0.980078	CDKN1B
ENSG00000129757	40.5664	-0.465311	0.533343	-0.872443	0.382967	0.64437	CDKN1C
ENSG00000168564	198.92	0.820708	0.29447	2.78707	0.00531877	0.0402363	CDKN2AIP
ENSG00000237190	443.336	-0.205549	0.223178	-0.921012	0.357044	0.62212	CDKN2AIPNL
ENSG00000123080	192.612	-0.614264	0.313064	-1.9621	0.0497509	0.185233	CDKN2C
ENSG00000129355	140.027	0.00782446	0.268295	0.0291637	0.976734	0.991692	CDKN2D
ENSG00000100526	504.935	0.386007	0.194327	1.98638	0.0469911	0.178705	CDKN3
ENSG00000205643	62.823	-0.560377	0.364066	-1.53922	0.123751	0.333231	CDPF1
ENSG00000140743	237.169	0.667954	0.248368	2.68937	0.00715868	0.0492013	CDR2
ENSG00000109089	611.967	0.860028	0.156572	5.49287	3.95e-08	2.97e-06	CDR2L
ENSG00000101290	714.806	-0.430579	0.153772	-2.80012	0.00510835	0.03898	CDS2
ENSG00000167513	548.726	0.00709347	0.201291	0.0352399	0.971888	0.989734	CDT1
ENSG00000091527	1535.45	0.630947	0.185407	3.40303	0.000666425	0.00904743	CDV3
ENSG00000153046	560.158	0.127218	0.173688	0.732453	0.463892	0.712722	CDYL
ENSG00000186567	27.578	0.463332	0.500919	0.924964	0.354984	0.620332	CEACAM19
ENSG00000245848	201.261	0.0585145	0.213646	0.273885	0.784173	0.904977	CEBPA
ENSG00000267296	47.875	-0.511183	0.382811	-1.33534	0.181765	0.422477	CEBPA-DT
ENSG00000172216	873.812	1.75982	0.199384	8.82628	1.08e-18	8.65e-16	CEBPB
ENSG00000221869	106.297	-0.679723	0.372787	-1.82335	0.0682497	0.226597	CEBPD
ENSG00000153879	712.577	1.01176	0.179841	5.62585	1.85e-08	1.57e-06	CEBPG
ENSG00000115816	1186.88	0.665988	0.209374	3.18085	0.00146846	0.0158307	CEBPZ
ENSG00000218739	365.723	0.304998	0.243156	1.25433	0.209722	0.459085	CEBPZOS
ENSG00000149187	853.181	0.484623	0.224847	2.15535	0.0311345	0.134991	CELF1
ENSG00000075275	720.618	-0.00911227	0.230314	-0.0395646	0.96844	0.988169	CELSR1
ENSG00000143126	348.78	-0.729525	0.318191	-2.29273	0.0218636	0.105804	CELSR2
ENSG00000008300	122.278	0.327434	0.266698	1.22773	0.219547	0.470714	CELSR3
ENSG00000135048	114.221	0.590607	0.277691	2.12685	0.0334323	0.141496	CEMIP2
ENSG00000205923	16.6054	-3.41936	1.38293	-2.47254	0.0134156	0.0758393	CEMP1
ENSG00000184524	30.3546	0.0516698	0.526065	0.0982193	0.921758	0.969266	CEND1
ENSG00000115163	266.462	0.182618	0.282012	0.647553	0.517274	0.75303	CENPA
ENSG00000125817	1109.47	-0.125278	0.141899	-0.882864	0.37731	0.63905	CENPB
ENSG00000177946	148.207	-0.0164144	0.2658	-0.0617548	0.950758	0.981221	CENPBD1
ENSG00000213753	233.746	-0.0684925	0.263247	-0.260184	0.794722	0.910573	CENPBD1P1
ENSG00000145241	201.37	-0.0749504	0.259959	-0.288316	0.773105	0.900308	CENPC
ENSG00000138778	663.858	0.676743	0.308919	2.19068	0.0284749	0.127448	CENPE
ENSG00000117724	2750.7	0.729411	0.253974	2.87199	0.00407896	0.0329711	CENPF
ENSG00000153044	241.552	0.2954	0.299953	0.984821	0.324712	0.591947	CENPH
ENSG00000102384	348.799	0.481464	0.306305	1.57185	0.115986	0.319185	CENPI
ENSG00000151849	311.769	0.246493	0.239331	1.02992	0.303045	0.569679	CENPJ
ENSG00000123219	281.389	0.232084	0.251763	0.921835	0.356615	0.621776	CENPK
ENSG00000120334	248.558	0.306821	0.22191	1.38264	0.166776	0.40151	CENPL
ENSG00000100162	123.76	0.162548	0.348238	0.466771	0.640664	0.835236	CENPM
ENSG00000166451	416.655	0.936236	0.247697	3.77976	0.00015698	0.00292359	CENPN
ENSG00000138092	499.872	-0.104658	0.233007	-0.449161	0.653315	0.841893	CENPO
ENSG00000188312	156.638	0.467964	0.336876	1.38913	0.164794	0.398685	CENPP
ENSG00000031691	185.191	0.38625	0.319395	1.20932	0.226541	0.479659	CENPQ
ENSG00000175279	123.279	-0.055238	0.281693	-0.196093	0.844537	0.934339	CENPS
ENSG00000251503	13.5404	0.0465103	0.97879	0.0475182	0.9621	0.986048	CENPS-CORT
ENSG00000102901	404.346	-0.289845	0.281611	-1.02924	0.303368	0.569716	CENPT
ENSG00000151725	613.181	0.367485	0.233822	1.57165	0.116033	0.319245	CENPU
ENSG00000166582	319.075	0.385857	0.249875	1.5442	0.12254	0.331238	CENPV
ENSG00000203760	311.488	0.214502	0.250355	0.856792	0.39156	0.651465	CENPW
ENSG00000169689	319.019	-0.0942181	0.250337	-0.376365	0.706646	0.870835	CENPX
ENSG00000116198	376.511	0.341761	0.205052	1.6667	0.0955739	0.281455	CEP104
ENSG00000154240	116.385	0.286716	0.282764	1.01397	0.310595	0.577166	CEP112
ENSG00000168944	378.923	0.678441	0.227682	2.97977	0.00288461	0.0258614	CEP120
ENSG00000100629	132.455	0.737569	0.342304	2.15471	0.0311841	0.135136	CEP128
ENSG00000141577	223.085	-0.277662	0.254565	-1.09073	0.275393	0.539549	CEP131
ENSG00000174799	62.9695	1.2499	0.589092	2.12174	0.0338592	0.14271	CEP135
ENSG00000103995	194.647	0.526152	0.263567	1.99627	0.0459044	0.175863	CEP152
ENSG00000135315	60.2464	0.51809	0.500688	1.03476	0.300783	0.56705	CEP162
ENSG00000110274	744.524	0.41062	0.151982	2.70177	0.00689705	0.0480226	CEP164
ENSG00000143702	1313.11	0.535755	0.155947	3.43549	0.000591485	0.00825965	CEP170
ENSG00000099814	731.58	0.439439	0.152725	2.87731	0.00401075	0.0325695	CEP170B
ENSG00000174007	116.84	-0.276575	0.263695	-1.04884	0.29425	0.561207	CEP19
ENSG00000101639	608.017	-0.114814	0.208796	-0.549885	0.582398	0.796308	CEP192
ENSG00000126001	823.695	0.467891	0.228409	2.04847	0.0405135	0.161009	CEP250
ENSG00000198707	181.891	0.111895	0.263648	0.424412	0.671265	0.851661	CEP290
ENSG00000166004	188.365	0.176783	0.232561	0.760157	0.447161	0.700348	CEP295
ENSG00000135837	592.924	0.511486	0.210238	2.43289	0.014979	0.0819117	CEP350
ENSG00000106477	225.243	0.163381	0.269601	0.606011	0.544507	0.771957	CEP41
ENSG00000164118	93.0563	-0.0973545	0.339621	-0.286656	0.774376	0.901132	CEP44
ENSG00000138180	1982.74	1.16904	0.223729	5.22528	1.74e-07	1.08e-05	CEP55
ENSG00000166037	378.791	-0.381996	0.20082	-1.90218	0.0571472	0.203012	CEP57
ENSG00000183137	241.16	0.303465	0.262195	1.1574	0.247108	0.506985	CEP57L1
ENSG00000182923	238.481	0.541422	0.236072	2.29346	0.0218216	0.105658	CEP63
ENSG00000011523	211.266	0.0306435	0.280852	0.109109	0.913116	0.965798	CEP68
ENSG00000114107	363.007	0.0469741	0.21629	0.217181	0.828067	0.926283	CEP70
ENSG00000112877	148.369	0.671521	0.30649	2.191	0.0284516	0.127376	CEP72
ENSG00000101624	177.168	0.344743	0.251745	1.36941	0.17087	0.407179	CEP76
ENSG00000148019	453.647	0.101617	0.229106	0.443537	0.657378	0.844473	CEP78
ENSG00000173588	176.396	-0.0109573	0.271833	-0.040309	0.967847	0.98794	CEP83
ENSG00000130695	361.653	0.329101	0.173227	1.89983	0.0574553	0.203695	CEP85
ENSG00000121289	497.294	-0.0730898	0.184746	-0.395623	0.692383	0.862852	CEP89
ENSG00000258890	263.292	0.249032	0.20017	1.24411	0.213461	0.463544	CEP95
ENSG00000182504	162.89	0.724136	0.291735	2.48217	0.0130584	0.0742736	CEP97
ENSG00000134255	290.124	-0.449419	0.238956	-1.88076	0.0600044	0.209479	CEPT1
ENSG00000167123	434.211	-0.950679	0.253087	-3.75634	0.00017242	0.00314451	CERCAM
ENSG00000100422	534.198	-0.213952	0.170848	-1.25229	0.210464	0.459918	CERK
ENSG00000143418	2799.78	0.184326	0.130664	1.41069	0.158337	0.388354	CERS2
ENSG00000090661	266.506	-0.768856	0.268219	-2.86652	0.00415007	0.0334252	CERS4
ENSG00000139624	246.441	-0.135263	0.211292	-0.640169	0.522063	0.756543	CERS5
ENSG00000172292	476.332	0.921127	0.313049	2.94244	0.00325637	0.0280227	CERS6
ENSG00000172831	344.436	-0.397031	0.207788	-1.91075	0.0560365	0.200811	CES2
ENSG00000172828	43.5299	-1.14759	0.442147	-2.59549	0.00944566	0.0597999	CES3
ENSG00000147400	633.52	-0.429702	0.217327	-1.97722	0.0480173	0.181157	CETN2
ENSG00000153140	439.737	-0.199202	0.199785	-0.997081	0.318725	0.58608	CETN3
ENSG00000160401	47.2326	0.00862204	0.415074	0.0207723	0.983427	0.99503	CFAP157
ENSG00000070761	422.22	0.445978	0.185459	2.40473	0.0161844	0.086302	CFAP20
ENSG00000159079	646.678	-0.265154	0.208391	-1.27239	0.203235	0.450725	CFAP298
ENSG00000197826	71.6728	0.196479	0.34297	0.572877	0.566728	0.786273	CFAP299
ENSG00000137691	31.1565	-0.376677	0.667634	-0.564196	0.57262	0.789711	CFAP300
ENSG00000163001	681.068	-0.0375063	0.170864	-0.21951	0.826253	0.9254	CFAP36
ENSG00000160226	127.084	-0.469677	0.355675	-1.32052	0.186661	0.428586	CFAP410
ENSG00000206530	40.4173	0.665322	0.850972	0.781838	0.43431	0.688923	CFAP44
ENSG00000164323	545.07	0.796766	0.264167	3.01614	0.00256013	0.0236644	CFAP97
ENSG00000243649	75.3965	-0.928945	0.508188	-1.82795	0.0675564	0.225586	CFB
ENSG00000197766	180.553	-1.1927	0.35734	-3.33772	0.0008447	0.0106649	CFD
ENSG00000153774	891.735	-0.321339	0.153688	-2.09085	0.0365411	0.150135	CFDP1
ENSG00000172757	2974.53	0.0634276	0.181187	0.350066	0.726289	0.880525	CFL1
ENSG00000165410	647.105	1.16717	0.185424	6.29459	3.08e-10	4.3e-08	CFL2
ENSG00000003402	844.608	0.219596	0.22795	0.963352	0.335371	0.602694	CFLAR
ENSG00000164430	185.192	1.24453	0.399187	3.11767	0.00182285	0.0184182	CGAS
ENSG00000163320	584.622	-0.062549	0.192482	-0.32496	0.745212	0.888968	CGGBP1
ENSG00000138028	165.936	-0.974278	0.305169	-3.19258	0.00141006	0.0153405	CGREF1
ENSG00000100532	102.455	0.360926	0.30386	1.1878	0.234911	0.49137	CGRRF1
ENSG00000197180	10.4814	0.273348	1.12986	0.241929	0.808835	0.917085	CH17-340M24.3
ENSG00000128965	88.4127	1.72405	0.400144	4.30857	1.64e-05	0.000493806	CHAC1
ENSG00000143942	144.926	1.1597	0.390127	2.97262	0.00295271	0.0262312	CHAC2
ENSG00000167670	883.253	0.00676896	0.176859	0.0382731	0.96947	0.988703	CHAF1A
ENSG00000159259	362.122	-0.016131	0.211963	-0.076103	0.939337	0.977443	CHAF1B
ENSG00000198824	151.362	0.520357	0.48259	1.07826	0.280918	0.546089	CHAMP1
ENSG00000172586	574.551	-0.0838861	0.18402	-0.455853	0.648496	0.839132	CHCHD1
ENSG00000250479	1039.15	-0.642362	0.248225	-2.58782	0.00965849	0.0607292	CHCHD10
ENSG00000106153	4034.02	0.282465	0.139588	2.02356	0.043015	0.16813	CHCHD2
ENSG00000106554	2155.25	0.426754	0.167352	2.55003	0.0107712	0.0655711	CHCHD3
ENSG00000163528	280.935	0.464055	0.226333	2.05032	0.0403335	0.160598	CHCHD4
ENSG00000125611	53.9858	-0.133123	0.362538	-0.367198	0.713472	0.87333	CHCHD5
ENSG00000159685	361.01	-0.607047	0.249331	-2.4347	0.014904	0.0816975	CHCHD6
ENSG00000170791	108.351	0.894948	0.390536	2.29159	0.0219295	0.106006	CHCHD7
ENSG00000153922	836.129	0.905101	0.262227	3.4516	0.000557283	0.00787588	CHD1
ENSG00000131778	684.138	0.140191	0.182379	0.768675	0.442086	0.695639	CHD1L
ENSG00000173575	730.198	0.392764	0.27066	1.45114	0.146742	0.370299	CHD2
ENSG00000170004	1208.42	-0.067603	0.169845	-0.398028	0.690609	0.861988	CHD3
ENSG00000111642	2309.43	0.0623761	0.156988	0.39733	0.691124	0.861988	CHD4
ENSG00000116254	579.495	0.198115	0.249378	0.794435	0.426942	0.682308	CHD5
ENSG00000124177	549.093	0.137347	0.21816	0.629572	0.528975	0.760869	CHD6
ENSG00000171316	281.159	1.25149	0.34524	3.62499	0.000288976	0.00474368	CHD7
ENSG00000100888	1047.34	-0.0151339	0.15798	-0.0957963	0.923682	0.970435	CHD8
ENSG00000177200	482.034	0.343607	0.232236	1.47956	0.138991	0.358195	CHD9
ENSG00000149554	326.438	0.188617	0.278926	0.676225	0.498898	0.739216	CHEK1
ENSG00000183765	492.276	-0.403017	0.192962	-2.08858	0.0367451	0.150657	CHEK2
ENSG00000085872	644.005	0.396903	0.195112	2.03424	0.0419276	0.165239	CHERP
ENSG00000072609	205.732	0.216077	0.275	0.785732	0.432025	0.686872	CHFR
ENSG00000109220	63.5042	0.793426	0.352806	2.2489	0.0245189	0.114768	CHIC2
ENSG00000177830	485.25	-0.674939	0.228776	-2.95022	0.00317551	0.0275018	CHID1
ENSG00000110721	259.218	0.893076	0.265213	3.3674	0.000758815	0.00988202	CHKA
ENSG00000100288	79.7195	0.233214	0.541648	0.430563	0.666786	0.849119	CHKB
ENSG00000254413	77.302	-2.05698	0.597477	-3.44277	0.000575789	0.00808542	CHKB-CPT1B
ENSG00000205559	23.0679	0.40188	0.801591	0.501353	0.616123	0.818069	CHKB-DT
ENSG00000188419	370.936	0.426294	0.214212	1.99005	0.0465852	0.177545	CHM
ENSG00000203668	318.494	0.63482	0.286839	2.21316	0.0268865	0.1223	CHML
ENSG00000131165	977.988	-0.386759	0.237704	-1.62706	0.103724	0.296902	CHMP1A
ENSG00000255112	801.11	0.518589	0.165018	3.14261	0.00167448	0.0173886	CHMP1B
ENSG00000130724	664.926	-0.111122	0.285266	-0.389538	0.696878	0.864903	CHMP2A
ENSG00000083937	344.132	0.702949	0.234164	3.00195	0.00268259	0.0243734	CHMP2B
ENSG00000115561	625.974	-0.313982	0.149864	-2.09511	0.0361614	0.149063	CHMP3
ENSG00000254505	186.251	-0.19306	0.440872	-0.437906	0.661455	0.846363	CHMP4A
ENSG00000101421	1133.33	0.193722	0.136729	1.41683	0.156533	0.38538	CHMP4B
ENSG00000086065	766.342	0.2518	0.173407	1.45207	0.146481	0.370177	CHMP5
ENSG00000176108	168.651	-0.150589	0.232774	-0.646931	0.517677	0.7533	CHMP6
ENSG00000147457	394.967	-0.56274	0.22314	-2.52191	0.011672	0.0687453	CHMP7
ENSG00000128656	51.229	1.58814	0.421532	3.76755	0.00016486	0.00303816	CHN1
ENSG00000110172	742.114	1.13582	0.259825	4.37148	1.23e-05	0.000395916	CHORDC1
ENSG00000187446	688.14	-0.0571385	0.186642	-0.30614	0.759498	0.89502	CHP1
ENSG00000123989	616.061	-0.291236	0.157567	-1.84833	0.0645543	0.219352	CHPF
ENSG00000033100	376.81	0.0739362	0.213094	0.346966	0.728617	0.881767	CHPF2
ENSG00000111666	387.93	0.649077	0.218313	2.97314	0.00294766	0.0261996	CHPT1
ENSG00000104472	239.211	0.271245	0.236792	1.1455	0.252002	0.512486	CHRAC1
ENSG00000090539	55.5343	-0.467557	0.449851	-1.03936	0.298637	0.565415	CHRD
ENSG00000180720	35.3757	-0.107668	0.474585	-0.226867	0.820527	0.922713	CHRM4
ENSG00000080644	37.6641	-0.470841	0.453655	-1.03788	0.299324	0.565791	CHRNA3
ENSG00000169684	63.6111	-0.184245	0.420363	-0.4383	0.661169	0.846363	CHRNA5
ENSG00000170175	30.9812	-0.604707	0.501076	-1.20682	0.227503	0.480852	CHRNB1
ENSG00000115526	171.368	0.251077	0.234541	1.0705	0.284393	0.550051	CHST10
ENSG00000136213	205.173	-0.513688	0.221896	-2.31499	0.0206134	0.101827	CHST12
ENSG00000180767	34.5922	-0.472377	0.550105	-0.858703	0.390504	0.651117	CHST13
ENSG00000169105	127.807	-0.347565	0.29689	-1.17069	0.241724	0.500123	CHST14
ENSG00000182022	286.842	-0.00525678	0.278215	-0.0188947	0.984925	0.995735	CHST15
ENSG00000175040	51.1796	0.599417	0.428455	1.39902	0.161807	0.393807	CHST2
ENSG00000122863	261.985	0.495007	0.226395	2.18647	0.028781	0.128263	CHST3
ENSG00000147119	124.552	-0.582954	0.250208	-2.32987	0.0198128	0.0993237	CHST7
ENSG00000131873	192.766	0.765244	0.219005	3.49418	0.000475514	0.00696088	CHSY1
ENSG00000127586	342.248	0.112262	0.222258	0.505097	0.613491	0.816278	CHTF18
ENSG00000168802	293.893	0.129258	0.252038	0.512849	0.608057	0.812607	CHTF8
ENSG00000160679	904.572	0.00599809	0.150645	0.0398161	0.96824	0.988081	CHTOP
ENSG00000213341	481.272	0.782057	0.193221	4.04748	5.18e-05	0.00124008	CHUK
ENSG00000258289	224.552	-0.52395	0.264305	-1.98237	0.0474383	0.179628	CHURC1
ENSG00000125954	26.0136	6.39757	2.92654	2.18605	0.028812	0.128304	CHURC1-FNTB
ENSG00000144021	1223.15	-0.157385	0.136343	-1.15433	0.248366	0.508503	CIAO1
ENSG00000166797	347.393	0.479738	0.221531	2.16556	0.0303449	0.132578	CIAO2A
ENSG00000166595	924.361	0.0337029	0.275199	0.122467	0.902529	0.960145	CIAO2B
ENSG00000103245	154.093	-0.208543	0.269676	-0.773312	0.439338	0.693375	CIAO3
ENSG00000005194	595.712	0.156951	0.297116	0.528246	0.597328	0.806434	CIAPIN1
ENSG00000185043	1056.25	-0.0736981	0.182812	-0.403136	0.686848	0.859587	CIB1
ENSG00000136425	214.354	-0.745207	0.32797	-2.27218	0.0230758	0.109951	CIB2
ENSG00000079432	568.108	-0.343997	0.19531	-1.76129	0.0781896	0.246663	CIC
ENSG00000186162	81.3675	0.504487	0.335599	1.50324	0.132776	0.348283	CIDECP1
ENSG00000100865	309.075	-0.237003	0.219228	-1.08108	0.279661	0.544455	CINP
ENSG00000163507	690.282	0.992673	0.239403	4.14645	3.38e-05	0.000878178	CIP2A
ENSG00000198894	219.859	-0.173849	0.257123	-0.676132	0.498957	0.739216	CIPC
ENSG00000138433	266.769	0.149132	0.264708	0.563384	0.573173	0.790102	CIR1
ENSG00000099622	663.94	-0.29945	0.232937	-1.28554	0.198603	0.443774	CIRBP
ENSG00000122873	297.081	0.218553	0.22049	0.991218	0.321579	0.589109	CISD1
ENSG00000145354	344.901	0.1826	0.220057	0.829786	0.40666	0.664894	CISD2
ENSG00000277972	390.672	-0.0395519	0.2758	-0.143408	0.885968	0.95384	CISD3
ENSG00000122966	612.154	0.155517	0.2588	0.600914	0.547897	0.774233	CIT
ENSG00000125931	11.7497	2.20544	1.22666	1.79792	0.0721893	0.234769	CITED1
ENSG00000164442	359.08	0.60714	0.241016	2.51909	0.011766	0.0691159	CITED2
ENSG00000179862	88.3235	1.06608	0.328966	3.2407	0.00119236	0.0137301	CITED4
ENSG00000148337	1151.93	0.0329517	0.143863	0.229049	0.818831	0.921583	CIZ1
ENSG00000136108	1397.22	0.812862	0.305326	2.66227	0.00776147	0.0522813	CKAP2
ENSG00000169607	516.686	0.848515	0.21718	3.90698	9.35e-05	0.0019605	CKAP2L
ENSG00000136026	577.899	-0.0694601	0.196294	-0.353857	0.723446	0.879059	CKAP4
ENSG00000175216	3588.36	0.132319	0.177785	0.744265	0.456716	0.708196	CKAP5
ENSG00000166165	821.146	-0.507527	0.301446	-1.68364	0.092251	0.275125	CKB
ENSG00000217555	380.326	-0.524459	0.265243	-1.97728	0.0480102	0.181157	CKLF
ENSG00000254788	14.7605	1.86257	0.915426	2.03465	0.0418859	0.165148	CKLF-CMTM1
ENSG00000223572	177.53	-0.199637	0.226507	-0.881373	0.378116	0.639988	CKMT1A
ENSG00000237289	209.48	-0.427052	0.245116	-1.74224	0.0814658	0.253451	CKMT1B
ENSG00000247572	121.63	0.237723	0.28512	0.833763	0.404415	0.663248	CKMT2-AS1
ENSG00000173207	1215.62	0.0485884	0.182243	0.266613	0.789767	0.908995	CKS1B
ENSG00000123975	3356.83	0.712111	0.134565	5.29194	1.21e-07	7.94e-06	CKS2
ENSG00000074054	653.038	0.099445	0.208652	0.476608	0.633642	0.830469	CLASP1
ENSG00000163539	373.338	0.395329	0.25696	1.53848	0.12393	0.333612	CLASP2
ENSG00000104859	579.028	-0.507519	0.210248	-2.41391	0.0157825	0.0851403	CLASRP
ENSG00000140104	235.214	-0.591712	0.22196	-2.66584	0.00767953	0.0519284	CLBA1
ENSG00000121940	370.549	0.0186172	0.174791	0.106511	0.915177	0.966457	CLCC1
ENSG00000175505	118.554	1.08548	0.295952	3.66775	0.000244699	0.00418076	CLCF1
ENSG00000114859	159.305	-0.327381	0.249317	-1.31311	0.189147	0.432301	CLCN2
ENSG00000109572	668.958	0.564233	0.174548	3.23255	0.00122692	0.0140159	CLCN3
ENSG00000171365	297.555	1.05471	0.234292	4.50168	6.74e-06	0.000238972	CLCN5
ENSG00000011021	280.71	0.0816275	0.19315	0.422612	0.672578	0.851913	CLCN6
ENSG00000103249	653.092	0.0536843	0.198001	0.271132	0.78629	0.906102	CLCN7
ENSG00000163347	593.844	1.96633	0.263653	7.45803	8.78e-14	2.62e-11	CLDN1
ENSG00000013297	914.462	0.159775	0.328268	0.48672	0.626457	0.825308	CLDN11
ENSG00000157224	457.664	0.607676	0.233394	2.60365	0.00922374	0.0589253	CLDN12
ENSG00000106404	190.088	-0.267439	0.242071	-1.10479	0.269249	0.532795	CLDN15
ENSG00000189143	1130.37	0.963632	0.807594	1.19321	0.232786	0.488203	CLDN4
ENSG00000080822	374.316	0.415598	0.253559	1.63906	0.101201	0.292009	CLDND1
ENSG00000038532	251.091	0.356722	0.220933	1.61462	0.106394	0.302347	CLEC16A
ENSG00000110852	323.099	0.794026	0.28403	2.79557	0.00518079	0.0393959	CLEC2B
ENSG00000153132	43.4862	0.688601	0.661696	1.04066	0.298033	0.564948	CLGN
ENSG00000162994	27.0245	-0.120107	0.66779	-0.179858	0.857264	0.939975	CLHC1
ENSG00000213719	6208.23	-0.0751318	0.14854	-0.505802	0.612996	0.816124	CLIC1
ENSG00000169504	1222.2	0.611621	0.237289	2.57753	0.00995086	0.0620376	CLIC4
ENSG00000113282	1169.41	0.4028	0.15898	2.53365	0.0112882	0.0675259	CLINT1
ENSG00000130779	1003.43	0.823528	0.187343	4.39583	1.1e-05	0.000361272	CLIP1
ENSG00000106665	617.933	-0.735623	0.183027	-4.0192	5.84e-05	0.0013634	CLIP2
ENSG00000115295	247.671	0.540129	0.19939	2.70891	0.00675045	0.0473803	CLIP4
ENSG00000013441	794.373	0.0823275	0.148014	0.556212	0.578066	0.79316	CLK1
ENSG00000176444	765.684	-0.683047	0.223131	-3.0612	0.00220455	0.0212257	CLK2
ENSG00000179335	558.756	-0.500285	0.197869	-2.52837	0.0114594	0.0679881	CLK3
ENSG00000113240	246.733	-0.201314	0.222296	-0.905611	0.365142	0.628813	CLK4
ENSG00000165959	155.493	0.334556	0.272736	1.22667	0.219947	0.471227	CLMN
ENSG00000188603	298.236	-0.455028	0.23295	-1.95333	0.0507806	0.187873	CLN3
ENSG00000102805	122.708	0.00100656	0.273513	0.00368012	0.997064	0.999316	CLN5
ENSG00000128973	322.474	0.443416	0.262485	1.6893	0.0911613	0.273215	CLN6
ENSG00000182372	26.2475	0.45518	0.656235	0.693623	0.487918	0.73061	CLN8
ENSG00000074201	1744.48	-0.295391	0.133917	-2.20579	0.027399	0.124022	CLNS1A
ENSG00000134852	404.515	0.56826	0.254959	2.22883	0.0258251	0.119106	CLOCK
ENSG00000172409	140.981	-0.0155318	0.253455	-0.0612803	0.951136	0.981221	CLP1
ENSG00000162129	222.627	-0.118976	0.228134	-0.521517	0.602007	0.809405	CLPB
ENSG00000125656	672.488	-0.298486	0.149094	-2.00199	0.0452856	0.174101	CLPP
ENSG00000104853	1119.54	0.156673	0.192564	0.813614	0.415866	0.673279	CLPTM1
ENSG00000049656	1852.13	0.295668	0.147603	2.00313	0.0451629	0.173813	CLPTM1L
ENSG00000166855	572.818	0.209276	0.162758	1.28581	0.19851	0.443749	CLPX
ENSG00000092853	419.305	0.75143	0.297224	2.52816	0.0114663	0.0679898	CLSPN
ENSG00000171603	1524.87	-0.108012	0.149845	-0.720829	0.471015	0.71814	CLSTN1
ENSG00000139182	552.091	-1.05485	0.242616	-4.34781	1.38e-05	0.000430898	CLSTN3
ENSG00000122705	1733.31	-0.0618826	0.212892	-0.290676	0.771299	0.899561	CLTA
ENSG00000175416	767.609	-0.152861	0.217154	-0.70393	0.481476	0.72591	CLTB
ENSG00000141367	4365.74	0.350657	0.176591	1.98571	0.047066	0.17891	CLTC
ENSG00000070371	176.957	0.177591	0.323869	0.548342	0.583457	0.79709	CLTCL1
ENSG00000120885	806.671	0.168941	0.178145	0.948335	0.342959	0.610588	CLU
ENSG00000103351	268.216	0.111391	0.232411	0.479284	0.631736	0.829653	CLUAP1
ENSG00000132361	2559.97	0.12541	0.136156	0.921079	0.357009	0.62212	CLUH
ENSG00000131797	61.0294	-0.709984	0.565027	-1.25655	0.208917	0.457976	CLUHP3
ENSG00000125246	29.7968	-0.0193247	0.561515	-0.0344153	0.972546	0.989945	CLYBL
ENSG00000111726	649.639	0.598884	0.234992	2.54852	0.010818	0.0657648	CMAS
ENSG00000164237	459.803	-0.572262	0.172396	-3.31946	0.000901929	0.0111511	CMBL
ENSG00000187118	123.942	0.767421	0.40452	1.89712	0.0578124	0.204507	CMC1
ENSG00000103121	368.824	0.172408	0.183787	0.938087	0.3482	0.614358	CMC2
ENSG00000182712	176.818	-0.0288117	0.295054	-0.097649	0.922211	0.969527	CMC4
ENSG00000153815	656.442	0.76558	0.221204	3.46096	0.000538248	0.0076561	CMIP
ENSG00000162368	1729.19	0.580155	0.210243	2.75945	0.0057899	0.0427265	CMPK1
ENSG00000184220	623.318	0.831443	0.233482	3.56105	0.00036937	0.0057215	CMSS1
ENSG00000140931	306.064	-0.245663	0.266179	-0.922923	0.356048	0.621219	CMTM3
ENSG00000183723	601.747	0.0599576	0.20125	0.297926	0.76576	0.897387	CMTM4
ENSG00000091317	667.78	0.451271	0.276077	1.63458	0.102137	0.29365	CMTM6
ENSG00000153551	297.441	-0.022898	0.268254	-0.0853593	0.931976	0.9742	CMTM7
ENSG00000170293	47.0289	-0.327998	0.37511	-0.874405	0.381898	0.643611	CMTM8
ENSG00000137200	850.614	-0.140366	0.162037	-0.866259	0.386348	0.647275	CMTR1
ENSG00000180917	412.793	0.674142	0.203556	3.31183	0.000926868	0.0113873	CMTR2
ENSG00000149646	17.7052	-3.76694	1.41118	-2.66935	0.00759982	0.0515082	CNBD2
ENSG00000169714	3444.96	-0.096695	0.131212	-0.736937	0.461161	0.711322	CNBP
ENSG00000133313	867.209	-0.471813	0.234212	-2.01447	0.0439602	0.170648	CNDP2
ENSG00000205423	152.235	-0.014767	0.312714	-0.0472221	0.962336	0.986048	CNEP1R1
ENSG00000105427	18.618	-0.843658	0.686921	-1.22817	0.219382	0.470533	CNFN
ENSG00000100528	722.56	0.228183	0.180139	1.26671	0.205259	0.45352	CNIH1
ENSG00000143786	173.312	0.163039	0.301857	0.54012	0.589114	0.800682	CNIH3
ENSG00000143771	1254.89	-0.328162	0.192109	-1.70821	0.0875975	0.266307	CNIH4
ENSG00000064666	511.454	-0.309235	0.165296	-1.87079	0.0613744	0.212406	CNN2
ENSG00000117519	74.6251	0.811493	0.367715	2.20685	0.0273244	0.123748	CNN3
ENSG00000119946	211.581	-0.105607	0.228998	-0.461171	0.644676	0.837017	CNNM1
ENSG00000148842	251.818	0.140222	0.415709	0.337309	0.735884	0.884681	CNNM2
ENSG00000168763	351.705	-0.0599427	0.206774	-0.289895	0.771897	0.899851	CNNM3
ENSG00000158158	437.329	0.114819	0.184306	0.622982	0.533296	0.764567	CNNM4
ENSG00000125107	3740.21	0.0197244	0.17163	0.114924	0.908505	0.963773	CNOT1
ENSG00000182973	314.833	0.178362	0.186228	0.957762	0.338183	0.605395	CNOT10
ENSG00000158435	504.382	0.149991	0.263755	0.568676	0.569576	0.787969	CNOT11
ENSG00000111596	336.767	-0.228436	0.225429	-1.01334	0.310899	0.577487	CNOT2
ENSG00000088038	686.198	-0.105624	0.212401	-0.497284	0.618989	0.820315	CNOT3
ENSG00000080802	212.303	0.671587	0.3123	2.15045	0.0315195	0.136053	CNOT4
ENSG00000113300	570.234	0.701897	0.264449	2.65419	0.00795002	0.0530434	CNOT6
ENSG00000138767	166.472	0.465351	0.311459	1.4941	0.13515	0.352166	CNOT6L
ENSG00000198791	929.397	0.31549	0.196624	1.60453	0.108597	0.305979	CNOT7
ENSG00000155508	477.132	-0.567182	0.352027	-1.61119	0.107139	0.303661	CNOT8
ENSG00000144580	419.818	-0.0128825	0.279611	-0.046073	0.963252	0.986204	CNOT9
ENSG00000173786	1566.23	-0.613263	0.136706	-4.48599	7.26e-06	0.000253671	CNP
ENSG00000115649	392.078	0.142794	0.19044	0.749809	0.45337	0.705146	CNPPD1
ENSG00000257727	686.3	-0.515386	0.200649	-2.56859	0.0102113	0.0631492	CNPY2
ENSG00000137161	570.568	-0.557908	0.165073	-3.37976	0.000725485	0.00959725	CNPY3
ENSG00000166997	72.529	-0.937105	0.349962	-2.67774	0.00741217	0.0505483	CNPY4
ENSG00000119865	35.1688	0.621005	0.449876	1.38039	0.167467	0.402492	CNRIP1
ENSG00000162852	288.978	0.618607	0.24671	2.50742	0.0121615	0.0706816	CNST
ENSG00000122756	52.2077	0.24852	0.399455	0.622149	0.533844	0.764728	CNTFR
ENSG00000044459	197.725	0.191818	0.29958	0.640289	0.521985	0.756493	CNTLN
ENSG00000108797	229.014	-0.754382	0.249529	-3.02322	0.00250101	0.0232894	CNTNAP1
ENSG00000154529	59.0969	-0.0412715	0.357099	-0.115575	0.90799	0.963506	CNTNAP3B
ENSG00000119397	537.152	0.380419	0.238529	1.59485	0.110745	0.309539	CNTRL
ENSG00000170037	597.564	0.350131	0.169364	2.06733	0.0387028	0.155737	CNTROB
ENSG00000106603	545.682	0.0737285	0.17135	0.43028	0.666992	0.849184	COA1
ENSG00000183978	381.165	-0.296405	0.24108	-1.22949	0.218888	0.470123	COA3
ENSG00000181924	829.886	0.0350061	0.182152	0.192181	0.8476	0.935504	COA4
ENSG00000183513	317.28	-0.0748363	0.229026	-0.326759	0.74385	0.888415	COA5
ENSG00000168275	542.104	0.55281	0.237055	2.33199	0.019701	0.0989893	COA6
ENSG00000231663	14.6041	1.33592	0.945386	1.4131	0.157627	0.387207	COA6-AS1
ENSG00000162377	460	0.408754	0.227867	1.79383	0.0728404	0.236013	COA7
ENSG00000068120	633.67	-0.200708	0.233974	-0.85782	0.390992	0.65132	COASY
ENSG00000106078	153.341	0.0960377	0.301843	0.318171	0.750356	0.891676	COBL
ENSG00000100473	51.2809	0.582518	0.47885	1.21649	0.223798	0.4764	COCH
ENSG00000166685	307.56	0.0731728	0.200447	0.365048	0.715075	0.874101	COG1
ENSG00000135775	337.762	-0.102821	0.184667	-0.556791	0.57767	0.79316	COG2
ENSG00000136152	271.29	0.263989	0.209595	1.25952	0.207843	0.456813	COG3
ENSG00000103051	762.015	-0.804429	0.212327	-3.78863	0.000151483	0.00284837	COG4
ENSG00000164597	573.282	0.726768	0.200719	3.62083	0.000293664	0.00478933	COG5
ENSG00000133103	165.15	-0.00829542	0.295114	-0.0281092	0.977575	0.991791	COG6
ENSG00000168434	186.379	-0.279817	0.267801	-1.04487	0.296083	0.562933	COG7
ENSG00000213380	353.697	-0.739258	0.254776	-2.9016	0.00371263	0.0307596	COG8
ENSG00000121058	260.698	0.23304	0.27236	0.855632	0.392201	0.652037	COIL
ENSG00000065618	1463.13	0.392782	0.194422	2.02026	0.0433569	0.169165	COL17A1
ENSG00000182871	790.458	-0.0985066	0.224036	-0.439691	0.660161	0.845756	COL18A1
ENSG00000164692	1775.29	-1.02334	0.236498	-4.32707	1.51e-05	0.000463629	COL1A2
ENSG00000196739	180.619	-0.145087	0.228329	-0.635429	0.525149	0.758983	COL27A1
ENSG00000187498	88.0255	0.230121	0.423964	0.542785	0.587278	0.799391	COL4A1
ENSG00000134871	177.616	-0.323822	0.262424	-1.23396	0.217217	0.468563	COL4A2
ENSG00000113163	407.811	0.706603	0.214901	3.28803	0.0010089	0.0120913	COL4A3BP
ENSG00000130635	92.3367	-2.77186	0.53156	-5.21457	1.84e-07	1.13e-05	COL5A1
ENSG00000204262	5042.69	0.126777	0.188375	0.673006	0.500944	0.74062	COL5A2
ENSG00000142156	1245.55	-0.952078	0.195125	-4.87933	1.06e-06	5.06e-05	COL6A1
ENSG00000142173	959.45	-1.10333	0.252694	-4.36626	1.26e-05	0.000404756	COL6A2
ENSG00000163359	1633.45	0.648616	0.21007	3.08762	0.00201768	0.0198394	COL6A3
[truncated: 9,586 more rows]

## Sheet: PANC-1
gene_id	baseMean	log2FoldChange	lfcSE	stat	pvalue	padj	symbol	tstat
ENSG00000099785	347.597	-0.814852	0.197089	-4.13444	3.56e-05	0.000613496	2023-03-02	-4.13444
ENSG00000117791	135.127	-0.738285	0.250589	-2.9462	0.00321704	0.0234197	2023-03-02	-2.9462
ENSG00000144583	176.611	1.96173	0.252196	7.77858	7.33e-15	1.17e-12	2023-03-04	7.77858
ENSG00000198060	1753.04	-0.275507	0.0855109	-3.2219	0.00127345	0.0114966	2023-03-05	-3.2219
ENSG00000145495	4791.43	-0.0596152	0.125615	-0.474585	0.635083	0.821933	2023-03-06	-0.474585
ENSG00000136536	2067.75	-0.31169	0.1902	-1.63875	0.101266	0.28241	2023-03-07	-1.63875
ENSG00000165406	1747.68	-0.395489	0.12982	-3.04644	0.0023157	0.0180421	2023-03-08	-3.04644
ENSG00000139266	64.4106	0.44679	0.370746	1.20511	0.22816	0.471757	2023-03-09	1.20511
ENSG00000168385	4810.64	-0.393086	0.182782	-2.15057	0.0315099	0.127226	2023-09-02	-2.15057
ENSG00000100167	274.832	-0.406325	0.312276	-1.30117	0.1932	0.427049	2023-09-03	-1.30117
ENSG00000184702	246.848	-0.0239199	0.304585	-0.078533	0.937404	0.974145	2023-09-05	-0.078533
ENSG00000125354	1223.53	-0.421029	0.0955105	-4.40819	1.04e-05	0.000222667	2023-09-06	-4.40819
ENSG00000122545	6722.94	-0.188065	0.114372	-1.64433	0.100109	0.280522	2023-09-07	-1.64433
ENSG00000164402	974.948	-0.260537	0.13221	-1.97063	0.0487663	0.173401	2023-09-08	-1.97063
ENSG00000184640	6767.08	-0.273708	0.166044	-1.6484	0.0992703	0.278854	2023-09-09	-1.6484
ENSG00000186522	2432.17	-0.0435969	0.163834	-0.266105	0.790158	0.908184	2023-09-10	-0.266105
ENSG00000138758	3283.69	-0.115973	0.108388	-1.06998	0.284626	0.537443	2023-09-11	-1.06998
ENSG00000121410	262.205	-0.818029	0.223296	-3.66343	0.000248858	0.00307508	A1BG	-3.66343
ENSG00000268895	147.607	-0.261953	0.373029	-0.702231	0.482535	0.716235	A1BG-AS1	-0.702231
ENSG00000128274	147.57	-0.3673	0.216428	-1.6971	0.0896774	0.25931	A4GALT	-1.6971
ENSG00000094914	974.673	0.318485	0.121695	2.61708	0.00886854	0.050866	AAAS	2.61708
ENSG00000081760	1290.63	-0.740422	0.142653	-5.19036	2.1e-07	7.44e-06	AACS	-5.19036
ENSG00000109576	128.732	0.511263	0.245814	2.07987	0.037537	0.144301	AADAT	2.07987
ENSG00000103591	2465.48	-0.294702	0.25258	-1.16676	0.243306	0.489915	AAGAB	-1.16676
ENSG00000115977	1572.6	-0.0186691	0.225496	-0.0827913	0.934017	0.972921	AAK1	-0.0827913
ENSG00000087884	528.312	-0.455019	0.160306	-2.83844	0.00453349	0.0305802	AAMDC	-2.83844
ENSG00000127837	2616.51	0.174938	0.0955214	1.8314	0.0670402	0.214687	AAMP	1.8314
ENSG00000131043	1208	0.217692	0.130899	1.66305	0.096302	0.272588	AAR2	1.66305
ENSG00000090861	5102.32	-0.212019	0.125685	-1.6869	0.0916225	0.263209	AARS	-1.6869
ENSG00000124608	643.87	0.36068	0.150185	2.40157	0.016325	0.0796191	AARS2	2.40157
ENSG00000266967	293.897	0.469459	0.19689	2.38438	0.0171081	0.0822459	AARSD1	2.38438
ENSG00000157426	290.535	-0.249624	0.146148	-1.70802	0.0876328	0.254959	AASDH	-1.70802
ENSG00000149313	2223.17	-0.425077	0.117702	-3.61147	0.00030447	0.00361593	AASDHPPT	-3.61147
ENSG00000275700	1827.45	0.496472	0.163757	3.03176	0.00243129	0.0187302	AATF	3.03176
ENSG00000281376	429.283	0.168694	0.207291	0.8138	0.41576	0.66303	ABALON	0.8138
ENSG00000251595	129.248	0.384179	0.287917	1.33434	0.182093	0.410594	ABCA11P	1.33434
ENSG00000107331	1009.39	-0.905853	0.193788	-4.67446	2.95e-06	7.49e-05	ABCA2	-4.67446
ENSG00000167972	2157.35	-0.819451	0.151322	-5.41527	6.12e-08	2.49e-06	ABCA3	-5.41527
ENSG00000154265	232.798	-1.15552	0.266485	-4.33614	1.45e-05	0.00029244	ABCA5	-4.33614
ENSG00000064687	912.882	-0.56905	0.121273	-4.69231	2.7e-06	6.96e-05	ABCA7	-4.69231
ENSG00000135776	688.078	-0.203934	0.166401	-1.22555	0.220366	0.462036	ABCB10	-1.22555
ENSG00000115657	407.46	-0.0647613	0.177597	-0.364653	0.715371	0.87106	ABCB6	-0.364653
ENSG00000131269	936.927	-0.0904702	0.107767	-0.839495	0.401191	0.650833	ABCB7	-0.839495
ENSG00000197150	792.042	-0.109966	0.13858	-0.793525	0.427472	0.67353	ABCB8	-0.793525
ENSG00000150967	573.128	-0.0460694	0.154622	-0.297948	0.765743	0.897188	ABCB9	-0.297948
ENSG00000103222	12847.1	-0.187175	0.108624	-1.72315	0.0848617	0.249715	ABCC1	-1.72315
ENSG00000124574	909.513	-0.124839	0.105266	-1.18594	0.235645	0.480765	ABCC10	-1.18594
ENSG00000023839	382.606	0.383513	0.254529	1.50676	0.131873	0.335243	ABCC2	1.50676
ENSG00000108846	2858.77	-0.530449	0.118862	-4.46274	8.09e-06	0.000178429	ABCC3	-4.46274
ENSG00000125257	2563.21	-0.345687	0.10898	-3.17203	0.0015138	0.0130614	ABCC4	-3.17203
ENSG00000114770	1865.1	-0.235384	0.103693	-2.27001	0.0232067	0.102159	ABCC5	-2.27001
ENSG00000255277	25.319	-0.443431	0.43301	-1.02407	0.305803	0.55966	ABCC6P2	-1.02407
ENSG00000101986	2258.22	-0.475858	0.149844	-3.17568	0.00149485	0.012943	ABCD1	-3.17568
ENSG00000117528	1608.43	-0.154476	0.10511	-1.46967	0.141651	0.350141	ABCD3	-1.46967
ENSG00000119688	346.496	0.0718943	0.142995	0.502775	0.615123	0.809222	ABCD4	0.502775
ENSG00000164163	3400.11	0.457485	0.142822	3.20317	0.00135924	0.0120367	ABCE1	3.20317
ENSG00000204574	3585.89	0.196925	0.133175	1.4787	0.139221	0.34648	ABCF1	1.4787
ENSG00000033050	3377.83	0.102521	0.152944	0.670321	0.502653	0.731531	ABCF2	0.670321
ENSG00000285292	208.903	1.62284	1.89633	0.855782	0.392118	0.642799	ABCF2	0.855782
ENSG00000161204	1357	-0.0658074	0.133282	-0.493747	0.621485	0.813614	ABCF3	-0.493747
ENSG00000118777	3270.55	-0.484516	0.170139	-2.84777	0.00440272	0.0299214	ABCG2	-2.84777
ENSG00000144827	742.377	-0.316516	0.184463	-1.71588	0.0861844	0.252298	ABHD10	-1.71588
ENSG00000106077	435.206	0.0289131	0.194386	0.148741	0.881758	0.949251	ABHD11	0.148741
ENSG00000225969	29.4876	0.488344	0.560506	0.871255	0.383615	0.634901	ABHD11-AS1	0.871255
ENSG00000100997	1899.79	-0.0750365	0.157739	-0.4757	0.634288	0.821474	ABHD12	-0.4757
ENSG00000139826	412.945	-0.397692	0.150548	-2.64163	0.00825092	0.0481021	ABHD13	-2.64163
ENSG00000248487	127.973	-0.0283191	0.361874	-0.0782569	0.937624	0.974205	ABHD14A	-0.0782569
ENSG00000114786	134.179	-0.799671	1.25601	-0.636676	0.524336	0.747464	ABHD14A-ACY1	-0.636676
ENSG00000114779	598.443	0.286228	0.354191	0.808119	0.419022	0.666039	ABHD14B	0.808119
ENSG00000168792	1370.1	-0.588148	0.13228	-4.44623	8.74e-06	0.000190996	ABHD15	-4.44623
ENSG00000204427	836.941	0.0969985	0.116717	0.831055	0.405943	0.655353	ABHD16A	0.831055
ENSG00000129968	949.529	-0.16642	0.288524	-0.576797	0.564077	0.776021	ABHD17A	-0.576797
ENSG00000107362	378.722	-0.155031	0.204984	-0.756304	0.449467	0.69109	ABHD17B	-0.756304
ENSG00000136379	413.157	-0.344764	0.145994	-2.3615	0.0182014	0.0860871	ABHD17C	-2.3615
ENSG00000164074	285.459	-0.261564	0.163247	-1.60226	0.109097	0.296783	ABHD18	-1.60226
ENSG00000140526	3862.55	0.172252	0.104714	1.64498	0.0999741	0.280277	ABHD2	1.64498
ENSG00000158201	645.03	0.16174	0.127858	1.265	0.205873	0.443166	ABHD3	1.265
ENSG00000100439	228.213	0.0547192	0.181364	0.30171	0.762873	0.896024	ABHD4	0.30171
ENSG00000011198	430.026	0.318251	0.168263	1.89139	0.0585719	0.196112	ABHD5	1.89139
ENSG00000163686	555.694	0.095697	0.144442	0.662528	0.507633	0.7348	ABHD6	0.662528
ENSG00000127220	359.801	-0.334174	0.150715	-2.21725	0.0266057	0.113473	ABHD8	-2.21725
ENSG00000136754	1155.05	-0.147529	0.0915128	-1.61211	0.106938	0.292974	ABI1	-1.61211
ENSG00000138443	1071.53	-0.0716898	0.13598	-0.52721	0.598047	0.799317	ABI2	-0.52721
ENSG00000097007	1940.8	-0.247927	0.123917	-2.00076	0.0454181	0.165289	ABL1	-2.00076
ENSG00000143322	2002.63	1.22275	0.133236	9.17729	4.42e-20	1.57e-17	ABL2	9.17729
ENSG00000099204	9282.48	-0.558861	0.10511	-5.31692	1.06e-07	4.01e-06	ABLIM1	-5.31692
ENSG00000173210	985.417	0.447849	0.225733	1.98397	0.0472588	0.169931	ABLIM3	1.98397
ENSG00000159842	4885.88	-0.32458	0.118842	-2.7312	0.00631048	0.0394058	ABR	-2.7312
ENSG00000146386	510.861	-0.257976	0.135078	-1.90983	0.0561551	0.19081	ABRACL	-1.90983
ENSG00000163322	223.304	0.0542433	0.175907	0.308363	0.757806	0.893712	ABRAXAS1	0.308363
ENSG00000165660	1017.24	0.234739	0.107141	2.19094	0.0284561	0.118462	ABRAXAS2	2.19094
ENSG00000146109	744.648	0.169324	0.138601	1.22166	0.221835	0.464232	ABT1	1.22166
ENSG00000114626	137.351	-0.562472	0.394883	-1.4244	0.15433	0.368597	ABTB1	-1.4244
ENSG00000166016	1345.63	0.328294	0.115483	2.84279	0.00447212	0.0302795	ABTB2	2.84279
ENSG00000060971	772.363	-0.217965	0.125137	-1.74181	0.0815411	0.243336	ACAA1	-1.74181
ENSG00000167315	1293.3	-0.305371	0.138957	-2.19759	0.0279783	0.116881	ACAA2	-2.19759
ENSG00000278540	5366.54	-0.868157	0.11065	-7.846	4.3e-15	7.1e-13	ACACA	-7.846
ENSG00000076555	318.637	-0.518438	0.259522	-1.99767	0.0457527	0.166233	ACACB	-1.99767
ENSG00000111271	532.409	-0.202144	0.173428	-1.16558	0.243785	0.490313	ACAD10	-1.16558
ENSG00000240303	680	-0.403498	0.212701	-1.89702	0.0578248	0.194629	ACAD11	-1.89702
ENSG00000151498	694.985	0.00506141	0.137964	0.0366865	0.970735	0.988582	ACAD8	0.0366865
ENSG00000177646	1229.07	-0.155134	0.100744	-1.53989	0.123587	0.322454	ACAD9	-1.53989
ENSG00000117054	1733.82	-0.163953	0.0876	-1.87161	0.0612609	0.20178	ACADM	-1.87161
ENSG00000122971	252.756	-0.408917	0.19666	-2.07931	0.0375885	0.144341	ACADS	-2.07931
ENSG00000196177	656.432	-0.711787	0.169199	-4.20679	2.59e-05	0.000472455	ACADSB	-4.20679
ENSG00000072778	2230.32	0.169828	0.143389	1.18439	0.236259	0.481421	ACADVL	1.18439
ENSG00000114331	2514.61	0.0229931	0.126153	0.182264	0.855376	0.937253	ACAP2	0.182264
ENSG00000131584	552.925	-0.154662	0.151642	-1.01991	0.307769	0.561832	ACAP3	-1.01991
ENSG00000075239	2367.19	-0.473025	0.109266	-4.32913	1.5e-05	0.000300085	ACAT1	-4.32913
ENSG00000120437	2602.15	-0.761792	0.124828	-6.10271	1.04e-09	6.41e-08	ACAT2	-6.10271
ENSG00000182827	1671.06	-0.0204322	0.150252	-0.135986	0.891832	0.953989	ACBD3	-0.135986
ENSG00000181513	109.807	-0.019041	0.230251	-0.0826967	0.934093	0.972921	ACBD4	-0.0826967
ENSG00000107897	899.385	-0.121066	0.105747	-1.14485	0.252269	0.500231	ACBD5	-1.14485
ENSG00000230124	1182.91	-0.171936	0.103171	-1.66651	0.0956125	0.271023	ACBD6	-1.66651
ENSG00000110455	372.146	-0.386431	0.192611	-2.00627	0.0448269	0.163738	ACCS	-2.00627
ENSG00000102977	358.095	0.141318	0.150089	0.941566	0.346415	0.601505	ACD	0.941566
ENSG00000159640	149.314	-0.67492	0.335977	-2.00883	0.0445554	0.162986	ACE	-2.00883
ENSG00000078124	1068.88	-0.404937	0.124287	-3.25808	0.00112168	0.010315	ACER3	-3.25808
ENSG00000087085	125.857	0.612533	0.350355	1.74832	0.0804086	0.241226	ACHE	1.74832
ENSG00000100813	3288.58	-0.0956367	0.113758	-0.840703	0.400514	0.650208	ACIN1	-0.840703
ENSG00000131473	7247.43	-0.802679	0.109707	-7.31659	2.54e-13	3.12e-11	ACLY	-7.31659
ENSG00000122729	2087.47	-0.40237	0.127517	-3.15543	0.00160259	0.0135854	ACO1	-3.15543
ENSG00000100412	2154.45	-0.251103	0.104573	-2.40123	0.0163401	0.0796476	ACO2	-2.40123
ENSG00000184227	163.604	-0.375858	0.201785	-1.86267	0.0625093	0.204534	ACOT1	-1.86267
ENSG00000172497	58.3344	1.42012	0.401205	3.53963	0.000400696	0.00448494	ACOT12	3.53963
ENSG00000112304	845.182	-0.170876	0.12284	-1.39104	0.164213	0.383163	ACOT13	-1.39104
ENSG00000119673	330.934	-0.454767	0.247056	-1.84075	0.0656582	0.211696	ACOT2	-1.84075
ENSG00000177465	82.7303	0.249913	0.367917	0.679264	0.496971	0.727949	ACOT4	0.679264
ENSG00000097021	2184.27	-0.249809	0.177404	-1.40814	0.15909	0.37567	ACOT7	-1.40814
ENSG00000101473	335.672	-0.0135767	0.132509	-0.102458	0.918393	0.966061	ACOT8	-0.102458
ENSG00000123130	1217.11	0.0694716	0.127937	0.543015	0.587119	0.79228	ACOT9	0.543015
ENSG00000161533	1420.15	-0.268684	0.112797	-2.38201	0.0172185	0.0826563	ACOX1	-2.38201
ENSG00000168306	50.8712	0.544329	0.431413	1.26174	0.207044	0.444433	ACOX2	1.26174
ENSG00000087008	368.572	-0.447066	0.175236	-2.55122	0.0107347	0.0587668	ACOX3	-2.55122
ENSG00000143727	1690.28	0.116667	0.22569	0.516935	0.605202	0.803815	ACP1	0.516935
ENSG00000134575	396.309	-0.115614	0.229409	-0.503966	0.614285	0.808656	ACP2	-0.503966
ENSG00000162836	380.533	0.129709	0.184737	0.702128	0.4826	0.716235	ACP6	0.702128
ENSG00000183760	577.939	1.35465	0.340554	3.9778	6.96e-05	0.00108007	ACP7	3.9778
ENSG00000167107	247.999	-1.12907	0.271326	-4.1613	3.16e-05	0.000559203	ACSF2	-4.1613
ENSG00000176715	363.035	-0.491293	0.167235	-2.93773	0.00330621	0.0239455	ACSF3	-2.93773
ENSG00000151726	765.666	0.320819	0.168535	1.90358	0.0569646	0.19255	ACSL1	1.90358
ENSG00000123983	3148.93	-0.290516	0.0965768	-3.00813	0.00262858	0.0199404	ACSL3	-3.00813
ENSG00000068366	2568.72	-0.307776	0.139534	-2.20574	0.0274019	0.115613	ACSL4	-2.20574
ENSG00000197142	97.2659	0.664042	0.32078	2.07009	0.0384444	0.146689	ACSL5	2.07009
ENSG00000154930	1040.23	-0.688053	0.192524	-3.57386	0.000351756	0.00404437	ACSS1	-3.57386
ENSG00000131069	857.594	-0.97823	0.238649	-4.09904	4.15e-05	0.000700686	ACSS2	-4.09904
ENSG00000107796	49.8427	-0.123278	0.35119	-0.351031	0.725565	0.876773	ACTA2	-0.351031
ENSG00000075624	37356.9	-0.277476	0.118119	-2.34911	0.0188183	0.0880775	ACTB	-2.34911
ENSG00000184009	28663.9	-0.191176	0.195093	-0.97992	0.327126	0.581547	ACTG1	-0.97992
ENSG00000136518	3102.67	0.131911	0.143853	0.916986	0.35915	0.614476	ACTL6A	0.916986
ENSG00000072110	6127.97	0.0201019	0.0868166	0.231544	0.816892	0.919208	ACTN1	0.231544
ENSG00000130402	59731.7	-0.00405941	0.0887811	-0.0457238	0.96353	0.985422	ACTN4	-0.0457238
ENSG00000131966	765.61	-0.250051	0.162499	-1.53879	0.123856	0.322901	ACTR10	-1.53879
ENSG00000138107	2420.65	-0.0798118	0.125761	-0.63463	0.52567	0.74872	ACTR1A	-0.63463
ENSG00000115073	655.249	-0.19078	0.156296	-1.22063	0.222226	0.464636	ACTR1B	-1.22063
ENSG00000138071	9432.53	-0.452925	0.0685991	-6.60248	4.04e-11	3.43e-09	ACTR2	-6.60248
ENSG00000115091	7447.72	0.0629984	0.090361	0.697186	0.485687	0.71844	ACTR3	0.697186
ENSG00000133627	274.554	0.0459708	0.178108	0.258107	0.796324	0.910839	ACTR3B	0.258107
ENSG00000106526	105.419	-0.258545	0.285938	-0.904197	0.365891	0.620713	ACTR3C	-0.904197
ENSG00000101442	527.448	0.608286	0.171645	3.54385	0.000394324	0.00443363	ACTR5	3.54385
ENSG00000075089	593.309	-0.197202	0.147255	-1.33918	0.180511	0.408139	ACTR6	-1.33918
ENSG00000113812	664.083	0.225289	0.124751	1.80592	0.0709316	0.2222	ACTR8	1.80592
ENSG00000184378	62.9984	0.239541	0.298561	0.802319	0.422369	0.669061	ACTRT3	0.802319
ENSG00000115170	1130.23	0.254624	0.121101	2.10258	0.0355023	0.138772	ACVR1	2.10258
ENSG00000135503	912.202	-0.9073	0.367234	-2.47063	0.0134875	0.0697937	ACVR1B	-2.47063
ENSG00000121989	137.553	0.459493	0.328684	1.39798	0.162119	0.380444	ACVR2A	1.39798
ENSG00000243989	348.557	-0.0545532	0.352789	-0.154634	0.87711	0.947499	ACY1	-0.154634
ENSG00000119640	195.176	-0.190259	0.226659	-0.839409	0.40124	0.650859	ACYP1	-0.839409
ENSG00000170634	171.793	-0.353144	0.18735	-1.88494	0.0594378	0.198276	ACYP2	-1.88494
ENSG00000196839	969.046	0.20794	0.102364	2.03138	0.042216	0.157152	ADA	2.03138
ENSG00000168803	539.189	-0.134302	0.204942	-0.655317	0.512264	0.73837	ADAL	-0.655317
ENSG00000137845	3536.3	-0.481979	0.119381	-4.03733	5.41e-05	0.000870842	ADAM10	-4.03733
ENSG00000073670	120.117	0.432247	0.271141	1.59418	0.110897	0.299813	ADAM11	1.59418
ENSG00000143537	815.86	0.221191	0.145407	1.52119	0.128212	0.329497	ADAM15	1.52119
ENSG00000151694	1694.44	0.268294	0.114661	2.33989	0.0192894	0.0896064	ADAM17	2.33989
ENSG00000135074	95.4601	0.54301	0.407692	1.33191	0.182889	0.411873	ADAM19	1.33191
ENSG00000008277	217.155	-0.820675	0.186631	-4.39731	1.1e-05	0.00023103	ADAM22	-4.39731
ENSG00000151651	94.8083	0.107927	0.27414	0.393694	0.693807	0.858245	ADAM8	0.393694
ENSG00000168615	3580.12	0.249909	0.107163	2.33205	0.0196979	0.0909866	ADAM9	2.33205
ENSG00000142303	87.6982	-0.899333	0.485577	-1.85209	0.0640125	0.208114	ADAMTS10	-1.85209
ENSG00000166106	1752	-0.317377	0.171527	-1.8503	0.0642698	0.208575	ADAMTS15	-1.8503
ENSG00000143382	253.006	-0.38404	0.278631	-1.37831	0.168108	0.389789	ADAMTSL4	-1.37831
ENSG00000185761	291.769	-0.313496	0.243957	-1.28505	0.198776	0.433865	ADAMTSL5	-1.28505
ENSG00000105963	86.3923	-0.237865	0.355037	-0.669974	0.502875	0.731741	ADAP1	-0.669974
ENSG00000184060	31.8543	-0.889864	0.478033	-1.86151	0.062672	0.204863	ADAP2	-1.86151
ENSG00000160710	5487.23	0.0848231	0.187583	0.452189	0.651133	0.832614	ADAR	0.452189
ENSG00000197381	414.025	-0.0621757	0.194777	-0.319215	0.749564	0.889436	ADARB1	-0.319215
ENSG00000065457	566.423	0.128093	0.135586	0.94473	0.344797	0.599377	ADAT1	0.94473
ENSG00000189007	255.217	0.264571	0.223671	1.18286	0.236866	0.482212	ADAT2	1.18286
ENSG00000213638	59.5987	-0.415375	0.577593	-0.719148	0.47205	0.708075	ADAT3	-0.719148
ENSG00000063761	236.406	-0.218471	0.185103	-1.18027	0.237895	0.483334	ADCK1	-1.18027
ENSG00000133597	554.456	0.0324462	0.174347	0.186101	0.852365	0.93542	ADCK2	0.186101
ENSG00000173137	166.323	-0.0632718	0.207797	-0.304488	0.760756	0.895331	ADCK5	-0.304488
ENSG00000138031	742.289	-0.299879	0.194084	-1.5451	0.122323	0.320377	ADCY3	-1.5451
ENSG00000174233	1091.6	-0.225298	0.131216	-1.717	0.0859793	0.251958	ADCY6	-1.717
ENSG00000121281	255.814	0.370251	0.24298	1.5238	0.12756	0.328373	ADCY7	1.5238
ENSG00000162104	1147.83	-0.33793	0.123429	-2.73785	0.00618414	0.0387877	ADCY9	-2.73785
ENSG00000087274	2617.95	-0.224887	0.28402	-0.7918	0.428478	0.673914	ADD1	-0.7918
ENSG00000148700	1407.51	-0.461981	0.243	-1.90115	0.0572818	0.193268	ADD3	-1.90115
ENSG00000152990	1548.42	-0.923975	0.182119	-5.07347	3.91e-07	1.27e-05	ADGRA3	-5.07347
ENSG00000181790	167.587	-0.839275	0.3305	-2.53941	0.0111039	0.0603346	ADGRB1	-2.53941
ENSG00000121753	825.627	-0.405912	0.139449	-2.91082	0.00360477	0.025622	ADGRB2	-2.91082
ENSG00000123146	2675.42	-0.0353655	0.124301	-0.284516	0.776015	0.901091	ADGRE5	-0.284516
ENSG00000205336	479.7	1.13402	0.285355	3.97405	7.07e-05	0.00109293	ADGRG1	3.97405
ENSG00000173698	179.005	0.359018	0.374693	0.958165	0.337979	0.592456	ADGRG2	0.958165
ENSG00000112414	6659.6	0.190946	0.221678	0.861366	0.389036	0.639744	ADGRG6	0.861366
ENSG00000072071	864.097	-0.601191	0.141433	-4.25072	2.13e-05	0.000403482	ADGRL1	-4.25072
ENSG00000117114	1446.15	-0.35239	0.187985	-1.87457	0.0608524	0.200987	ADGRL2	-1.87457
ENSG00000197894	2497.23	-0.0027582	0.113641	-0.0242712	0.980636	0.992034	ADH5	-0.0242712
ENSG00000182551	1639.24	-0.0583429	0.146985	-0.396931	0.691418	0.857056	ADI1	-0.396931
ENSG00000159346	2539.72	-0.0576347	0.0950694	-0.606238	0.544357	0.761562	ADIPOR1	-0.606238
ENSG00000006831	4103.38	-0.178366	0.0893399	-1.99649	0.0458811	0.166469	ADIPOR2	-1.99649
ENSG00000148671	195.167	0.77184	0.252751	3.05375	0.00225997	0.0177544	ADIRF	3.05375
ENSG00000156110	1578.82	0.134	0.134518	0.996151	0.319177	0.573368	ADK	0.996151
ENSG00000148926	939.923	-0.220671	0.206862	-1.06675	0.286083	0.538492	ADM	-1.06675
ENSG00000128165	189.86	-0.727068	0.349479	-2.08043	0.0374857	0.14414	ADM2	-2.08043
ENSG00000101126	1464.12	0.0371625	0.274359	0.135452	0.892254	0.954172	ADNP	0.135452
ENSG00000101544	1875.08	0.143053	0.163474	0.875083	0.381529	0.633116	ADNP2	0.875083
ENSG00000259456	33.1817	-0.43454	0.410157	-1.05945	0.289396	0.542248	ADNP-AS1	-1.05945
ENSG00000181915	1168.28	-0.10141	0.115724	-0.876305	0.380864	0.632437	ADO	-0.876305
ENSG00000163485	127.312	-0.8022	0.41646	-1.92623	0.0540751	0.185589	ADORA1	-1.92623
ENSG00000128271	54.5732	0.874446	0.815493	1.07229	0.283589	0.536387	ADORA2A	1.07229
ENSG00000170425	1087.89	0.730442	0.12957	5.63743	1.73e-08	7.91e-07	ADORA2B	5.63743
ENSG00000159322	1553.33	0.0331357	0.111417	0.297401	0.76616	0.897188	ADPGK	0.297401
ENSG00000144843	328.352	0.211248	0.173916	1.21465	0.224498	0.467602	ADPRH	1.21465
ENSG00000153531	183.942	1.44092	0.262792	5.48313	4.18e-08	1.76e-06	ADPRHL1	5.48313
ENSG00000116863	873.56	0.427542	0.151993	2.8129	0.00490967	0.0324991	ADPRHL2	2.8129
ENSG00000170222	101.911	0.202038	0.283001	0.713915	0.47528	0.710075	ADPRM	0.713915
ENSG00000170214	299.376	-0.390936	0.212374	-1.8408	0.0656516	0.211696	ADRA1B	-1.8408
ENSG00000184160	273.897	-1.36735	0.204234	-6.69501	2.16e-11	1.9e-09	ADRA2C	-6.69501
ENSG00000043591	274.158	0.299945	0.154388	1.94279	0.0520409	0.180583	ADRB1	1.94279
ENSG00000130706	3780.54	0.51372	0.133605	3.84507	0.000120519	0.00169503	ADRM1	3.84507
ENSG00000239900	2062.55	0.198104	0.108576	1.82456	0.0680671	0.216741	ADSL	1.82456
ENSG00000035687	1818.78	0.00379314	0.0957181	0.0396283	0.96839	0.987498	ADSS	0.0396283
ENSG00000185100	156.624	-1.05237	0.206181	-5.1041	3.32e-07	1.12e-05	ADSSL1	-5.1041
ENSG00000139154	521.882	-0.266507	0.187589	-1.4207	0.155405	0.370096	AEBP2	-1.4207
ENSG00000181026	1231.52	1.20091	0.202868	5.91967	3.23e-09	1.77e-07	AEN	5.91967
ENSG00000104964	3927.69	-0.475711	0.0866172	-5.4921	3.97e-08	1.7e-06	AES	-5.4921
ENSG00000196526	3989.73	-0.176753	0.176679	-1.00042	0.317107	0.571407	AFAP1	-1.00042
ENSG00000272620	2309.7	-0.065493	0.224437	-0.291811	0.770431	0.898995	AFAP1-AS1	-0.291811
ENSG00000157510	698.772	0.404133	0.202002	2.00063	0.0454319	0.165309	AFAP1L1	2.00063
ENSG00000169129	4424.09	-0.495934	0.197417	-2.51212	0.012001	0.0639959	AFAP1L2	-2.51212
ENSG00000130396	3642.84	-0.135478	0.0889783	-1.5226	0.12786	0.328847	AFDN	-1.5226
ENSG00000172493	453.681	0.222697	0.279843	0.795792	0.426153	0.672258	AFF1	0.795792
ENSG00000072364	4388.13	-0.0988288	0.12054	-0.819882	0.412283	0.660246	AFF4	-0.819882
ENSG00000135537	263.505	-0.0663768	0.18417	-0.36041	0.718541	0.872831	AFG1L	-0.36041
ENSG00000223959	261.144	0.119716	0.208794	0.573369	0.566395	0.777217	AFG3L1P	0.573369
ENSG00000141385	2554.4	0.0636032	0.135677	0.468783	0.639224	0.824424	AFG3L2	0.468783
ENSG00000183077	470.696	0.00936113	0.2132	0.0439076	0.964978	0.985658	AFMID	0.0439076
ENSG00000119844	901.524	0.0588829	0.169366	0.347667	0.728091	0.878196	AFTPH	0.347667
ENSG00000038002	336.375	-0.394312	0.14351	-2.74763	0.00600277	0.0379299	AGA	-2.74763
ENSG00000157985	1335.54	-0.190138	0.151553	-1.2546	0.209624	0.448082	AGAP1	-1.2546
ENSG00000265018	110.003	0.175008	0.235602	0.742813	0.457595	0.697089	AGAP12P	0.742813
ENSG00000255737	320.835	-0.154954	0.145673	-1.06371	0.28746	0.539936	AGAP2-AS1	-1.06371
ENSG00000133612	1485.31	-0.226039	0.116916	-1.93334	0.0531943	0.18343	AGAP3	-1.93334
ENSG00000188234	195.358	0.43375	0.208556	2.07978	0.0375457	0.144301	AGAP4	2.07978
ENSG00000172650	122.59	0.134299	0.289486	0.46392	0.642705	0.826817	AGAP5	0.46392
ENSG00000204149	308.221	0.291771	0.181117	1.61095	0.10719	0.293203	AGAP6	1.61095
ENSG00000264204	103.599	0.142923	0.267725	0.533843	0.59345	0.796494	AGAP7P	0.533843
ENSG00000204172	254.418	0.320821	0.169444	1.89337	0.0583082	0.195786	AGAP9	1.89337
ENSG00000165923	121.44	-0.125258	0.311419	-0.402218	0.687524	0.854924	AGBL2	-0.402218
ENSG00000146856	42.4475	0.199815	0.373812	0.534534	0.592972	0.796337	AGBL3	0.534534
ENSG00000084693	1288.46	-0.337746	0.117011	-2.88644	0.00389621	0.0272735	AGBL5	-2.88644
ENSG00000173744	2186.72	0.0307435	0.0860851	0.357129	0.720995	0.8741	AGFG1	0.357129
ENSG00000106351	365.205	1.21097	0.243177	4.97981	6.36e-07	1.94e-05	AGFG2	4.97981
ENSG00000164252	1243.88	-0.233611	0.140311	-1.66495	0.0959234	0.271714	AGGF1	-1.66495
ENSG00000006530	704.841	0.0876901	0.110878	0.790872	0.429018	0.674313	AGK	0.790872
ENSG00000162688	790.445	-0.379604	0.157881	-2.40436	0.0162006	0.0792267	AGL	-2.40436
ENSG00000116771	133.217	0.188311	0.281556	0.668824	0.503608	0.732275	AGMAT	0.668824
ENSG00000092847	2067.6	-0.03714	0.117814	-0.315243	0.752577	0.891682	AGO1	-0.315243
ENSG00000123908	2184.41	-0.00495055	0.0876009	-0.0565126	0.954933	0.98195	AGO2	-0.0565126
ENSG00000126070	986.588	0.0338006	0.11111	0.304208	0.760969	0.895377	AGO3	0.304208
ENSG00000134698	783.851	-0.440446	0.194671	-2.26251	0.0236657	0.103604	AGO4	-2.26251
ENSG00000204310	2603.44	-0.236757	0.102895	-2.30097	0.0213935	0.0966212	AGPAT1	-2.30097
ENSG00000169692	793.29	-0.564395	0.222	-2.54232	0.0110119	0.0598825	AGPAT2	-2.54232
ENSG00000160216	1035.6	-0.48388	0.212677	-2.27519	0.0228945	0.101325	AGPAT3	-2.27519
ENSG00000026652	615.379	-0.115664	0.23763	-0.486741	0.626442	0.816105	AGPAT4	-0.486741
ENSG00000155189	799.635	-0.0715253	0.240951	-0.296846	0.766584	0.897249	AGPAT5	-0.296846
ENSG00000018510	2876.39	-0.012648	0.0992136	-0.127483	0.898558	0.956471	AGPS	-0.127483
ENSG00000106541	3491.17	-0.574875	0.171478	-3.35246	0.000800961	0.00782237	AGR2	-3.35246
ENSG00000188157	5311.67	-0.505418	0.148584	-3.40158	0.000669987	0.00681085	AGRN	-3.40158
ENSG00000135049	451.521	0.00112141	0.145235	0.00772132	0.993839	0.99766	AGTPBP1	0.00772132
ENSG00000177674	581.398	-0.231139	0.185779	-1.24416	0.213441	0.453409	AGTRAP	-1.24416
ENSG00000153207	2976.82	0.118841	0.166601	0.713332	0.475641	0.7104	AHCTF1	0.713332
ENSG00000226121	579.465	0.233967	0.131829	1.77478	0.0759343	0.231976	AHCTF1P1	1.77478
ENSG00000101444	5033.33	-0.145089	0.139916	-1.03697	0.299748	0.553001	AHCY	-1.03697
ENSG00000168710	4438.81	-0.597488	0.255034	-2.34277	0.019141	0.0891409	AHCYL1	-2.34277
ENSG00000158467	944.157	-0.484546	0.113333	-4.27542	1.91e-05	0.000367934	AHCYL2	-4.27542
ENSG00000126705	1221.73	-0.374734	0.118651	-3.1583	0.00158693	0.0134872	AHDC1	-3.1583
ENSG00000135541	681.944	0.104584	0.137865	0.758595	0.448095	0.690391	AHI1	0.758595
ENSG00000124942	65747.6	-0.117422	0.088116	-1.33259	0.182668	0.411516	AHNAK	-1.33259
ENSG00000185567	17221.6	-0.796767	0.120476	-6.61348	3.75e-11	3.21e-09	AHNAK2	-6.61348
ENSG00000106546	1437.11	-0.127146	0.143488	-0.886107	0.37556	0.628944	AHR	-0.886107
ENSG00000063438	130.845	0.224741	0.284364	0.790328	0.429336	0.674451	AHRR	0.790328
ENSG00000100591	2912.33	0.363085	0.140947	2.57603	0.0099942	0.0556651	AHSA1	2.57603
ENSG00000173209	932.835	0.170953	0.155987	1.09594	0.273103	0.526034	AHSA2P	1.09594
ENSG00000186063	2554.15	-0.0175686	0.141238	-0.12439	0.901007	0.957581	AIDA	-0.12439
ENSG00000126878	185.386	-0.382994	0.531096	-0.721138	0.470825	0.707306	AIF1L	-0.721138
ENSG00000156709	2935.01	-0.313472	0.127411	-2.46032	0.0138814	0.0710812	AIFM1	-2.46032
ENSG00000042286	963.996	0.330911	0.157522	2.10073	0.0356646	0.139269	AIFM2	2.10073
ENSG00000146416	563.301	-0.584775	0.156822	-3.7289	0.000192315	0.00249865	AIG1	-3.7289
ENSG00000164022	1500.8	0.257485	0.10523	2.44688	0.0144101	0.0728395	AIMP1	2.44688
ENSG00000106305	1138.49	0.188475	0.224887	0.838091	0.401979	0.651579	AIMP2	0.838091
ENSG00000110711	1289.92	-0.149519	0.100732	-1.48433	0.137721	0.344512	AIP	-1.48433
ENSG00000232434	221.252	-0.930491	0.202265	-4.60036	4.22e-06	0.000101575	AJM1	-4.60036
ENSG00000129474	1334.84	0.303917	0.318995	0.952733	0.340725	0.595587	AJUBA	0.952733
ENSG00000106992	477.848	-0.388233	0.160624	-2.41703	0.0156476	0.0772218	AK1	-2.41703
ENSG00000004455	3052.91	0.635965	0.214379	2.96655	0.00301161	0.0222124	AK2	2.96655
ENSG00000147853	537.199	-0.428443	0.237546	-1.80362	0.0712905	0.222867	AK3	-1.80362
ENSG00000162433	820.864	0.0920115	0.346257	0.265732	0.790445	0.908256	AK4	0.265732
ENSG00000154027	68.7749	-0.00515017	0.322586	-0.0159653	0.987262	0.994921	AK5	-0.0159653
ENSG00000085231	1075.01	0.189987	0.197598	0.961483	0.336309	0.590572	AK6	0.961483
ENSG00000155085	68.1242	-0.072098	0.283914	-0.253943	0.79954	0.91168	AK9	-0.253943
ENSG00000121057	2226.28	0.538852	0.22556	2.38896	0.0168964	0.081425	AKAP1	2.38896
ENSG00000108599	759.147	0.0487225	0.134264	0.362887	0.71669	0.87139	AKAP10	0.362887
ENSG00000023516	1455.29	-0.22994	0.17473	-1.31597	0.188183	0.419369	AKAP11	-1.31597
ENSG00000131016	29241.9	0.79667	0.225998	3.52512	0.000423292	0.00467198	AKAP12	3.52512
ENSG00000170776	4553.48	0.566433	0.102824	5.50876	3.61e-08	1.56e-06	AKAP13	5.50876
ENSG00000197976	708.785	0.138309	0.119365	1.1587	0.246577	0.493618	AKAP17A	1.1587
ENSG00000118507	112.723	0.0590316	0.28974	0.20374	0.838557	0.928419	AKAP7	0.20374
ENSG00000105127	974.409	-0.0609933	0.122789	-0.496731	0.619379	0.812236	AKAP8	-0.496731
ENSG00000011243	1131.37	-0.0142313	0.144334	-0.0986003	0.921456	0.967528	AKAP8L	-0.0986003
ENSG00000127914	1384.27	-0.0816312	0.231329	-0.352879	0.724179	0.876086	AKAP9	-0.352879
ENSG00000166452	522.162	-0.0823298	0.157185	-0.523776	0.600434	0.801143	AKIP1	-0.523776
ENSG00000174574	3323.19	0.73115	0.267579	2.73246	0.00628626	0.0392792	AKIRIN1	2.73246
ENSG00000135334	1227.25	0.656384	0.128905	5.092	3.54e-07	1.18e-05	AKIRIN2	5.092
ENSG00000106948	188.027	-0.521014	0.266687	-1.95365	0.0507425	0.177755	AKNA	-1.95365
ENSG00000117448	1394.3	-0.018537	0.098022	-0.189111	0.850006	0.934122	AKR1A1	-0.189111
ENSG00000085662	1142.93	-0.222852	0.094435	-2.35985	0.0182823	0.0863837	AKR1B1	-2.35985
ENSG00000165568	57.5203	-0.137777	0.351159	-0.392348	0.694801	0.858779	AKR1E2	-0.392348
ENSG00000053371	1075.4	-0.662647	0.238149	-2.78249	0.00539443	0.0349375	AKR7A2	-2.78249
ENSG00000142208	2741.41	-0.679685	0.137271	-4.9514	7.37e-07	2.19e-05	AKT1	-4.9514
ENSG00000204673	2416.38	-0.131837	0.151039	-0.872864	0.382737	0.633918	AKT1S1	-0.872864
ENSG00000105221	31807.5	-0.152651	0.0943242	-1.61837	0.105584	0.290289	AKT2	-1.61837
ENSG00000117020	202.499	-0.0765648	0.383184	-0.199812	0.841627	0.929909	AKT3	-0.199812
ENSG00000166971	447.72	0.459837	0.12897	3.56546	0.000363212	0.00416885	AKTIP	3.56546
ENSG00000148218	332.149	-0.267363	0.157836	-1.69393	0.0902795	0.260555	ALAD	-1.69393
ENSG00000023330	2052.53	0.181132	0.0880579	2.05696	0.03969	0.150286	ALAS1	2.05696
ENSG00000170017	1877.15	0.0391756	0.122775	0.319084	0.749662	0.889436	ALCAM	0.319084
ENSG00000161618	359.848	0.0618688	0.177731	0.348104	0.727762	0.878066	ALDH16A1	0.348104
ENSG00000059573	2432.29	0.234241	0.0952525	2.45916	0.0139262	0.0711242	ALDH18A1	2.45916
ENSG00000184254	3191.26	-0.239352	0.23933	-1.00009	0.317265	0.571544	ALDH1A3	-1.00009
ENSG00000137124	1342.71	-0.146891	0.151176	-0.971661	0.331219	0.585624	ALDH1B1	-0.971661
ENSG00000111275	187.051	-0.513997	0.293805	-1.74945	0.0802133	0.240965	ALDH2	-1.74945
ENSG00000072210	1033.39	-0.497629	0.232894	-2.13672	0.0326211	0.130544	ALDH3A2	-2.13672
ENSG00000006534	514.736	-0.723616	0.263973	-2.74125	0.00612062	0.0384673	ALDH3B1	-2.74125
ENSG00000159423	634.267	-0.384258	0.240939	-1.59483	0.110749	0.299632	ALDH4A1	-1.59483
ENSG00000112294	172.07	-1.09527	0.569151	-1.92439	0.0543063	0.186036	ALDH5A1	-1.92439
ENSG00000119711	95.8989	0.501054	0.336854	1.48745	0.136896	0.342932	ALDH6A1	1.48745
ENSG00000164904	1060.65	-0.590893	0.106748	-5.53538	3.11e-08	1.35e-06	ALDH7A1	-5.53538
ENSG00000143149	1517.69	-0.134691	0.0884601	-1.52262	0.127854	0.328847	ALDH9A1	-1.52262
ENSG00000285043	448.098	0.731532	0.403295	1.81389	0.0696952	0.219854	ALDOA	1.81389
ENSG00000149925	13628	-0.478362	0.102518	-4.66615	3.07e-06	7.74e-05	ALDOA	-4.66615
ENSG00000109107	325.537	-1.40438	0.422329	-3.32532	0.000883168	0.00846281	ALDOC	-3.32532
ENSG00000033011	761.239	0.046916	0.195158	0.2404	0.81002	0.915931	ALG1	0.2404
ENSG00000139133	156.626	0.286966	0.205426	1.39693	0.162434	0.380758	ALG10	1.39693
ENSG00000175548	237.848	-0.149644	0.328726	-0.455225	0.648948	0.831399	ALG10B	-0.455225
ENSG00000253710	452.678	0.422551	0.385543	1.09599	0.273084	0.526034	ALG11	1.09599
ENSG00000182858	582.887	-0.20688	0.135407	-1.52784	0.126551	0.327263	ALG12	-1.52784
ENSG00000101901	864.897	-0.0836227	0.160531	-0.520914	0.602427	0.802386	ALG13	-0.520914
ENSG00000119523	682.889	-0.0237291	0.118884	-0.199598	0.841795	0.929938	ALG2	-0.199598
ENSG00000214160	1172.2	0.359511	0.165442	2.17304	0.0297776	0.122246	ALG3	2.17304
ENSG00000120697	440.991	0.0265382	0.126965	0.20902	0.834432	0.92652	ALG5	0.20902
ENSG00000088035	622.949	-0.491208	0.139753	-3.51482	0.000440045	0.0048167	ALG6	-3.51482
ENSG00000159063	1509.01	0.176539	0.112573	1.56823	0.116828	0.310954	ALG8	1.56823
ENSG00000086848	724.075	-0.284159	0.168985	-1.68156	0.0926537	0.265212	ALG9	-1.68156
ENSG00000100601	313.281	0.379293	0.149753	2.53279	0.0113159	0.0612557	ALKBH1	2.53279
ENSG00000189046	367.319	0.659322	0.245803	2.68232	0.00731137	0.0439147	ALKBH2	2.68232
ENSG00000166199	461.178	-0.221766	0.18049	-1.22869	0.219189	0.460248	ALKBH3	-1.22869
ENSG00000160993	316.631	-0.0950797	0.189011	-0.503037	0.614938	0.809153	ALKBH4	-0.503037
ENSG00000091542	2438.6	-0.154201	0.0877992	-1.7563	0.0790378	0.238339	ALKBH5	-1.7563
ENSG00000239382	330.317	-0.195582	0.1703	-1.14846	0.250781	0.498721	ALKBH6	-1.14846
ENSG00000125652	446.166	-0.446613	0.19075	-2.34135	0.0192141	0.0893819	ALKBH7	-2.34135
ENSG00000137760	626.27	0.882849	0.144957	6.09042	1.13e-09	6.88e-08	ALKBH8	6.09042
ENSG00000116127	1025.85	-0.0390544	0.115033	-0.339506	0.734228	0.882061	ALMS1	-0.339506
ENSG00000215067	125.469	0.341285	0.235166	1.45125	0.14671	0.356885	ALOX12-AS1	1.45125
ENSG00000163286	80.1813	-1.24446	0.424594	-2.93094	0.0033794	0.0243516	ALPG	-2.93094
ENSG00000003393	2528.7	-0.0531108	0.0864451	-0.614388	0.538959	0.75841	ALS2	-0.614388
ENSG00000183684	2416.17	0.275268	0.164962	1.66867	0.0951825	0.270113	ALYREF	1.66867
ENSG00000242110	377.227	-0.493434	0.311207	-1.58555	0.112841	0.303392	AMACR	-1.58555
ENSG00000110497	1142	0.341068	0.150665	2.26375	0.0235897	0.103379	AMBRA1	2.26375
ENSG00000123505	2681.22	0.583297	0.151921	3.83947	0.000123301	0.00172318	AMD1	3.83947
ENSG00000162066	584.971	-0.330784	0.223423	-1.48053	0.138732	0.345804	AMDHD2	-1.48053
ENSG00000184675	374.775	-0.233161	0.138186	-1.6873	0.0915456	0.263064	AMER1	-1.6873
ENSG00000159461	1858.69	-0.258175	0.225242	-1.14621	0.251707	0.499919	AMFR	-1.14621
ENSG00000104899	108.854	-0.310248	0.297464	-1.04298	0.296959	0.550488	AMH	-1.04298
ENSG00000139211	859.649	-0.0961563	0.176105	-0.546018	0.585054	0.790731	AMIGO2	-0.546018
ENSG00000101935	905.08	-0.134197	0.148875	-0.901405	0.367373	0.62158	AMMECR1	-0.901405
ENSG00000144233	1554.78	0.0207818	0.0932888	0.222768	0.823716	0.922653	AMMECR1L	0.222768
ENSG00000151743	380.888	0.0171983	0.148825	0.11556	0.908001	0.96077	AMN1	0.11556
ENSG00000126016	217.895	-1.16452	0.292985	-3.97467	7.05e-05	0.00109096	AMOT	-3.97467
ENSG00000166025	726.672	0.0388131	0.169321	0.229228	0.818692	0.920063	AMOTL1	0.229228
ENSG00000114019	1905.03	-0.00947067	0.249084	-0.038022	0.96967	0.98818	AMOTL2	-0.038022
ENSG00000116337	806.847	-0.285773	0.167533	-1.70577	0.0880512	0.255577	AMPD2	-1.70577
ENSG00000133805	309.126	0.872987	0.221478	3.94165	8.09e-05	0.00122032	AMPD3	3.94165
ENSG00000196704	1076.4	0.102038	0.106615	0.957063	0.338535	0.593221	AMZ2	0.957063
ENSG00000214174	179.442	-0.0198076	0.204979	-0.0966321	0.923019	0.968043	AMZ2P1	-0.0966321
ENSG00000153107	2379.84	0.136342	0.11008	1.23858	0.215502	0.456188	ANAPC1	1.23858
ENSG00000164162	163.029	0.210066	0.236199	0.889357	0.373811	0.627392	ANAPC10	0.889357
ENSG00000141552	1150.2	-0.274579	0.238456	-1.15149	0.249532	0.497235	ANAPC11	-1.15149
ENSG00000129055	1313.69	-0.359047	0.200259	-1.79292	0.0729865	0.226603	ANAPC13	-1.79292
ENSG00000110200	546.725	-0.267242	0.173798	-1.53766	0.124132	0.323193	ANAPC15	-1.53766
ENSG00000166295	2859.87	-0.0781879	0.104882	-0.745484	0.455979	0.695642	ANAPC16	-0.745484
ENSG00000176248	657.493	-0.117023	0.132042	-0.886255	0.37548	0.628944	ANAPC2	-0.886255
ENSG00000053900	660.576	-0.0842246	0.110213	-0.764198	0.444749	0.68712	ANAPC4	-0.764198
ENSG00000089053	2981.84	0.0422089	0.1288	0.327709	0.743131	0.886638	ANAPC5	0.327709
ENSG00000196510	2209.51	-0.0330197	0.133513	-0.247314	0.804665	0.913923	ANAPC7	-0.247314
ENSG00000214274	35.4567	-0.265203	0.660792	-0.401341	0.688169	0.855043	ANG	-0.401341
ENSG00000013523	766.032	-0.322313	0.115771	-2.78405	0.00536846	0.0348274	ANGEL1	-2.78405
ENSG00000174606	690.59	-0.365237	0.115596	-3.15959	0.0015799	0.0134482	ANGEL2	-3.15959
ENSG00000167772	1025.8	-0.0665653	0.313632	-0.212241	0.831919	0.925773	ANGPTL4	-0.212241
ENSG00000029534	1204.01	-0.0532262	0.143212	-0.37166	0.710146	0.867947	ANK1	-0.37166
ENSG00000145362	289.637	-0.513407	0.300439	-1.70886	0.0874775	0.254681	ANK2	-1.70886
ENSG00000151687	82.5348	0.173739	0.29541	0.588128	0.556446	0.770308	ANKAR	0.588128
ENSG00000166839	182.967	0.000594273	0.254556	0.00233454	0.998137	0.999347	ANKDD1A	0.00233454
ENSG00000132623	322.2	0.025037	0.175685	0.14251	0.886677	0.951941	ANKEF1	0.14251
ENSG00000185722	1757.18	-0.481811	0.113156	-4.25795	2.06e-05	0.000392913	ANKFY1	-4.25795
ENSG00000154122	368.953	0.0494893	0.161134	0.307132	0.758743	0.894136	ANKH	0.307132
ENSG00000131503	1981.48	0.304702	0.204095	1.49294	0.135452	0.340906	ANKHD1	1.49294
ENSG00000254996	2729.14	-0.283841	0.174444	-1.62712	0.103711	0.28697	ANKHD1-EIF4EBP3	-1.62712
ENSG00000001629	3315.45	-0.174789	0.098816	-1.76883	0.0769225	0.233879	ANKIB1	-1.76883
ENSG00000176915	2444.26	0.035449	0.102146	0.347042	0.728559	0.878499	ANKLE2	0.347042
ENSG00000144504	231.106	-0.337286	0.178235	-1.89237	0.0584415	0.195942	ANKMY1	-1.89237
ENSG00000106524	823.64	0.196509	0.112604	1.74513	0.0809625	0.242265	ANKMY2	1.74513
ENSG00000164331	127.495	-0.0163461	0.289114	-0.0565388	0.954913	0.98195	ANKRA2	-0.0565388
ENSG00000148677	68.0619	3.54716	0.388763	9.12423	7.22e-20	2.43e-17	ANKRD1	9.12423
ENSG00000088448	1201.95	0.216357	0.122258	1.76968	0.0767806	0.233519	ANKRD10	1.76968
ENSG00000167522	3085.61	0.392584	0.343318	1.1435	0.252832	0.500843	ANKRD11	1.1435
ENSG00000101745	740.684	0.0546976	0.895623	0.0610721	0.951302	0.980309	ANKRD12	0.0610721
ENSG00000076513	1164.3	0.219333	0.0965344	2.27207	0.0230823	0.10175	ANKRD13A	2.27207
ENSG00000198720	453.967	-0.181357	0.13468	-1.34657	0.178118	0.404707	ANKRD13B	-1.34657
ENSG00000118454	779.168	0.0149539	0.15603	0.0958395	0.923648	0.968266	ANKRD13C	0.0958395
ENSG00000172932	562.928	0.0601049	0.138483	0.434025	0.66427	0.841007	ANKRD13D	0.434025
ENSG00000134461	122.171	0.00865643	0.243031	0.0356187	0.971586	0.988977	ANKRD16	0.0356187
ENSG00000132466	2927.62	0.0848583	0.0923635	0.918742	0.35823	0.613559	ANKRD17	0.918742
ENSG00000180071	214.642	0.205737	0.267958	0.767796	0.442608	0.685359	ANKRD18A	0.767796
ENSG00000230453	96.8917	0.0894645	0.287987	0.310654	0.756063	0.893313	ANKRD18B	0.310654
ENSG00000163126	35.6456	0.524068	0.582367	0.899893	0.368177	0.622305	ANKRD23	0.899893
ENSG00000107890	428.197	-0.222749	0.258146	-0.862878	0.388204	0.639011	ANKRD26	-0.862878
ENSG00000105186	2406.57	-0.0817675	0.0810875	-1.00839	0.313269	0.566918	ANKRD27	-1.00839
ENSG00000206560	2002.64	0.0155838	0.131794	0.118244	0.905875	0.959702	ANKRD28	0.118244
ENSG00000154065	46.0319	1.48467	0.472001	3.14549	0.0016581	0.0139428	ANKRD29	3.14549
ENSG00000164236	1264.41	1.03068	0.153519	6.71371	1.9e-11	1.7e-09	ANKRD33B	6.71371
ENSG00000135976	315.296	0.104885	0.224349	0.467508	0.640137	0.825064	ANKRD36	0.467508
ENSG00000196912	189.553	0.180208	0.25154	0.716418	0.473733	0.708939	ANKRD36B	0.716418
ENSG00000174501	222.537	0.415765	0.2259	1.84048	0.065698	0.211758	ANKRD36C	1.84048
ENSG00000186352	105.886	-0.0379332	0.281048	-0.13497	0.892635	0.954296	ANKRD37	-0.13497
ENSG00000213337	319.469	0.0943328	0.198763	0.4746	0.635072	0.821933	ANKRD39	0.4746
ENSG00000154945	2539.38	0.117298	0.0813257	1.44233	0.14921	0.361414	ANKRD40	1.44233
ENSG00000137494	235.666	0.112861	0.311018	0.362878	0.716696	0.87139	ANKRD42	0.362878
ENSG00000065413	300.18	0.341795	0.235577	1.45088	0.146813	0.357046	ANKRD44	1.45088
ENSG00000186106	199.369	-0.220516	0.243399	-0.905987	0.364942	0.619871	ANKRD46	-0.905987
ENSG00000168876	432.529	-0.581005	0.34799	-1.6696	0.0949984	0.269822	ANKRD49	-1.6696
ENSG00000151458	1164.86	-0.40712	0.134494	-3.02705	0.00246951	0.0189584	ANKRD50	-3.02705
ENSG00000139645	3562.9	-0.463941	0.0931686	-4.97959	6.37e-07	1.94e-05	ANKRD52	-4.97959
ENSG00000100124	470.388	-0.0727288	0.140756	-0.5167	0.605366	0.803846	ANKRD54	-0.5167
ENSG00000156381	306.588	-0.491339	0.184571	-2.66206	0.00776651	0.0459393	ANKRD9	-2.66206
ENSG00000064999	945.514	0.173104	0.114046	1.51784	0.129055	0.33095	ANKS1A	1.51784
ENSG00000185046	83.5777	-0.827559	0.389683	-2.12367	0.0336977	0.133907	ANKS1B	-2.12367
ENSG00000168096	322.529	0.028934	0.154289	0.187531	0.851244	0.934773	ANKS3	0.187531
ENSG00000165138	734.355	-0.17793	0.165034	-1.07814	0.280971	0.533934	ANKS6	-1.07814
ENSG00000163516	499.267	-0.709894	0.231342	-3.0686	0.00215068	0.0171338	ANKZF1	-3.0686
ENSG00000011426	6466.11	0.491594	0.199811	2.4603	0.0138821	0.0710812	ANLN	2.4603
ENSG00000160746	676.419	-0.541421	0.116655	-4.64121	3.46e-06	8.55e-05	ANO10	-4.64121
ENSG00000177119	5744.48	-0.277105	0.115874	-2.39143	0.0167827	0.0809955	ANO6	-2.39143
ENSG00000146205	73.4399	-0.264256	0.273251	-0.967084	0.333502	0.587701	ANO7	-0.967084
ENSG00000074855	312.868	-0.748947	0.173567	-4.31504	1.6e-05	0.00031827	ANO8	-4.31504
ENSG00000185101	650.27	-0.666286	0.24811	-2.68544	0.00724334	0.0435984	ANO9	-2.68544
ENSG00000140350	4536.68	-0.353727	0.122327	-2.89166	0.00383218	0.0269202	ANP32A	-2.89166
ENSG00000259516	24.2947	0.0289125	0.527104	0.0548517	0.956257	0.982475	ANP32AP1	0.0548517
ENSG00000136938	4264.41	-0.0961824	0.136821	-0.702983	0.482067	0.71601	ANP32B	-0.702983
ENSG00000143401	2256.54	-0.110411	0.153104	-0.721152	0.470816	0.707306	ANP32E	-0.721152
ENSG00000166825	6483.33	0.0571104	0.0980421	0.582509	0.560224	0.77281	ANPEP	0.582509
ENSG00000169604	3772.29	-0.623863	0.126058	-4.94903	7.46e-07	2.21e-05	ANTXR1	-4.94903
ENSG00000163297	1161.73	0.738531	0.140741	5.24743	1.54e-07	5.61e-06	ANTXR2	5.24743
ENSG00000135046	3487.88	1.08742	0.0845395	12.8628	7.29e-38	2.89e-34	ANXA1	12.8628
ENSG00000122359	4239	0.085194	0.128815	0.661365	0.508378	0.735279	ANXA11	0.661365
ENSG00000182718	39791	-0.160556	0.0992464	-1.61775	0.105717	0.290496	ANXA2	-1.61775
ENSG00000213406	26.0804	0.253482	0.512659	0.494445	0.620992	0.813449	ANXA2P1	0.494445
ENSG00000231991	4843.48	-0.195182	0.109422	-1.78375	0.0744647	0.229335	ANXA2P2	-1.78375
ENSG00000177721	113.788	0.541491	0.235923	2.2952	0.0217214	0.0977242	ANXA2R	2.2952
ENSG00000138772	42.616	0.382633	0.438734	0.87213	0.383138	0.634401	ANXA3	0.87213
ENSG00000196975	3236.13	-0.412398	0.10244	-4.02575	5.68e-05	0.000908948	ANXA4	-4.02575
ENSG00000164111	7117.42	0.392363	0.139328	2.81611	0.00486096	0.032252	ANXA5	2.81611
ENSG00000197043	2039.28	-0.480962	0.135843	-3.54057	0.000399266	0.00447147	ANXA6	-3.54057
ENSG00000138279	4089.82	0.0803603	0.150876	0.532624	0.594294	0.797091	ANXA7	0.532624
ENSG00000143412	87.7901	-0.219732	0.265148	-0.828714	0.407266	0.656552	ANXA9	-0.828714
ENSG00000138356	257.779	1.99879	0.194877	10.2566	1.1e-24	7.56e-22	AOX1	10.2566
ENSG00000138660	612.676	0.151364	0.133957	1.12994	0.258501	0.508218	AP1AR	1.12994
ENSG00000100280	1935.83	0.114094	0.109811	1.039	0.298803	0.55231	AP1B1	1.039
ENSG00000166747	3285.74	-0.026449	0.102447	-0.258173	0.796273	0.910833	AP1G1	-0.258173
ENSG00000213983	462.328	-0.0289303	0.130307	-0.222017	0.824301	0.92287	AP1G2	-0.222017
ENSG00000072958	1315.81	-0.107906	0.163573	-0.659681	0.509459	0.736369	AP1M1	-0.659681
ENSG00000129354	58.3284	0.877482	0.405133	2.16591	0.0303181	0.123697	AP1M2	2.16591
ENSG00000106367	1763.54	-0.075931	0.134529	-0.564421	0.572468	0.782089	AP1S1	-0.564421
ENSG00000182287	297.642	-0.595041	0.186639	-3.18819	0.00143167	0.0125105	AP1S2	-3.18819
ENSG00000152056	1533.76	0.49324	0.102812	4.79749	1.61e-06	4.38e-05	AP1S3	4.79749
ENSG00000196961	1820.53	-0.554697	0.136668	-4.05872	4.93e-05	0.000809257	AP2A1	-4.05872
ENSG00000183020	2752	-0.584033	0.09239	-6.32138	2.59e-10	1.85e-08	AP2A2	-6.32138
ENSG00000006125	12844.6	0.0357575	0.139661	0.256031	0.797927	0.910887	AP2B1	0.256031
ENSG00000161203	5511.04	0.0530314	0.108232	0.489981	0.624148	0.815043	AP2M1	0.489981
ENSG00000042753	1201.5	-0.10672	0.110067	-0.969587	0.332252	0.586667	AP2S1	-0.969587
ENSG00000132842	2485	-0.235674	0.126472	-1.86345	0.0623995	0.20439	AP3B1	-1.86345
ENSG00000065000	4496.64	-0.117672	0.158825	-0.74089	0.45876	0.697961	AP3D1	-0.74089
ENSG00000185009	3168.01	-0.162088	0.0932165	-1.73883	0.0820649	0.244385	AP3M1	-1.73883
ENSG00000070718	380.1	-0.303426	0.28015	-1.08309	0.278771	0.53134	AP3M2	-1.08309
ENSG00000177879	1922.75	-0.212735	0.13895	-1.53102	0.125763	0.325988	AP3S1	-1.53102
ENSG00000157823	980.639	0.0991041	0.10086	0.982593	0.325808	0.580035	AP3S2	0.982593
ENSG00000134262	323.325	0.0335058	0.222787	0.150394	0.880454	0.949001	AP4B1	0.150394
ENSG00000081014	692.09	-0.0440427	0.162519	-0.271001	0.78639	0.906342	AP4E1	-0.271001
ENSG00000221838	700.595	-0.380313	0.170025	-2.23681	0.025299	0.109001	AP4M1	-2.23681
ENSG00000100478	170.693	0.531852	0.188403	2.82295	0.00475833	0.0317273	AP4S1	2.82295
ENSG00000254470	1615.39	-0.397056	0.0939743	-4.22516	2.39e-05	0.000443255	AP5B1	-4.22516
ENSG00000053770	655.413	-0.456444	0.153087	-2.9816	0.00286748	0.0213368	AP5M1	-2.9816
ENSG00000125843	244.051	-0.13766	0.268366	-0.512955	0.607983	0.805435	AP5S1	-0.512955
ENSG00000242802	1130.97	-0.214052	0.106212	-2.01533	0.04387	0.161217	AP5Z1	-2.01533
ENSG00000120868	639.499	-0.336288	0.118623	-2.83493	0.00458357	0.0308656	APAF1	-2.83493
ENSG00000011132	366.181	0.203944	0.145748	1.39929	0.161726	0.379997	APBA3	1.39929
ENSG00000166313	206.817	0.242215	0.244484	0.990718	0.321823	0.575938	APBB1	0.990718
ENSG00000163697	603.946	-0.111968	0.128223	-0.87323	0.382538	0.633833	APBB2	-0.87323
ENSG00000113108	325.749	-0.328468	0.170841	-1.92265	0.0545236	0.18664	APBB3	-1.92265
ENSG00000134982	692.565	-1.13506	0.329906	-3.44057	0.000580492	0.00606832	APC	-3.44057
ENSG00000115266	350.078	-1.07812	0.248378	-4.34063	1.42e-05	0.000288296	APC2	-4.34063
ENSG00000164062	2233.32	-0.0967091	0.142318	-0.679528	0.496803	0.727875	APEH	-0.679528
ENSG00000100823	773.583	-0.220635	0.224119	-0.984451	0.324894	0.578967	APEX1	-0.984451
ENSG00000169188	1266.77	0.0536359	0.146062	0.367212	0.713461	0.870069	APEX2	0.367212
ENSG00000117362	2860.89	0.168697	0.162818	1.03611	0.300152	0.553283	APH1A	1.03611
ENSG00000138613	171.041	0.101745	0.459179	0.221581	0.82464	0.923115	APH1B	0.221581
ENSG00000166181	1816.52	0.152165	0.0971048	1.56701	0.117111	0.311413	API5	1.56701
ENSG00000149089	746.909	-0.0916709	0.12526	-0.731847	0.464262	0.702408	APIP	-0.731847
ENSG00000105290	1084.22	-0.923522	0.197846	-4.66789	3.04e-06	7.68e-05	APLP1	-4.66789
ENSG00000084234	21843.2	-0.452455	0.0886565	-5.10346	3.33e-07	1.12e-05	APLP2	-5.10346
ENSG00000101474	5407.79	-0.250622	0.114001	-2.19843	0.0279184	0.116784	APMAP	-2.19843
ENSG00000179750	260.726	0.761296	0.197281	3.85893	0.000113882	0.00161775	APOBEC3B	3.85893
ENSG00000244509	473.868	0.238743	0.129803	1.83927	0.0658759	0.212087	APOBEC3C	1.83927
ENSG00000243811	66.8728	-0.0233257	0.383435	-0.0608337	0.951492	0.980443	APOBEC3D	-0.0608337
ENSG00000128394	130.912	0.303348	0.257787	1.17674	0.2393	0.48493	APOBEC3F	1.17674
ENSG00000239713	124.419	0.895916	0.216122	4.14542	3.39e-05	0.000589627	APOBEC3G	4.14542
ENSG00000130208	202.285	-0.352669	0.252732	-1.39542	0.162888	0.381463	APOC1	-1.39542
ENSG00000130203	7538.89	-0.612124	0.228483	-2.67907	0.00738262	0.0442407	APOE	-2.67907
ENSG00000100342	128.758	0.453294	0.291434	1.55539	0.119852	0.315834	APOL1	1.55539
ENSG00000128335	799.009	0.20194	0.136241	1.48222	0.138282	0.345182	APOL2	1.48222
ENSG00000128284	87.719	0.391225	0.383535	1.02005	0.307705	0.561818	APOL3	1.02005
ENSG00000221963	1127.41	0.760202	0.192691	3.94519	7.97e-05	0.00121068	APOL6	3.94519
ENSG00000178878	307.391	-0.381897	0.860614	-0.443749	0.657224	0.83634	APOLD1	-0.443749
ENSG00000204444	30.5411	-0.0218609	0.471713	-0.0463437	0.963036	0.985279	APOM	-0.0463437
ENSG00000184831	387.968	0.136467	0.168811	0.808399	0.418861	0.665943	APOO	0.808399
ENSG00000155008	1202.13	-0.332159	0.134522	-2.46918	0.0135423	0.0700043	APOOL	-2.46918
ENSG00000256053	529.237	0.0531787	0.247934	0.214487	0.830167	0.925208	APOPT1	0.214487
ENSG00000142192	16552.6	-0.259506	0.120124	-2.16032	0.0307477	0.124911	APP	-2.16032
ENSG00000062725	834.512	-0.300735	0.108043	-2.78348	0.00537797	0.0348664	APPBP2	-2.78348
ENSG00000157500	1548.64	-0.31618	0.122421	-2.58272	0.00980255	0.0548813	APPL1	-2.58272
ENSG00000136044	625.178	-0.311112	0.137923	-2.2557	0.0240893	0.104905	APPL2	-2.2557
ENSG00000198931	1780	-0.333116	0.154665	-2.15379	0.0312566	0.126439	APRT	-2.15379
ENSG00000214293	176.277	0.732551	0.298365	2.45522	0.0140799	0.0716632	APTR	2.45522
ENSG00000137074	1000.49	0.129661	0.135684	0.955613	0.339268	0.593947	APTX	0.955613
ENSG00000178301	61.1605	0.543287	0.326967	1.66159	0.0965944	0.27326	AQP11	1.66159
ENSG00000021776	2429.43	-0.103564	0.103968	-0.996114	0.319195	0.573368	AQR	-0.996114
ENSG00000078061	1513.47	0.029359	0.134682	0.217987	0.827439	0.924352	ARAF	0.217987
ENSG00000186635	2065.59	-0.242795	0.130748	-1.85698	0.0633146	0.20625	ARAP1	-1.85698
ENSG00000047365	269.667	0.365112	0.159389	2.2907	0.0219807	0.0985392	ARAP2	2.2907
ENSG00000120318	162.006	-0.0617773	0.235738	-0.262059	0.793276	0.909239	ARAP3	-0.262059
ENSG00000198576	69.8439	2.94811	0.46042	6.40309	1.52e-10	1.14e-08	ARC	6.40309
ENSG00000095139	6222.79	-0.474787	0.259706	-1.82817	0.0675243	0.215611	ARCN1	-1.82817
ENSG00000109321	59.7201	1.74605	0.337598	5.17197	2.32e-07	8.09e-06	AREG	5.17197
ENSG00000119682	1568.63	-0.0948664	0.115263	-0.82304	0.410485	0.658913	AREL1	-0.82304
ENSG00000143761	7041.17	-0.0230076	0.126027	-0.182561	0.855143	0.937209	ARF1	-0.182561
ENSG00000134287	4774.86	-0.276606	0.097024	-2.8509	0.00435959	0.0297	ARF3	-2.8509
ENSG00000168374	3197.26	0.0832713	0.24167	0.344566	0.730421	0.879604	ARF4	0.344566
ENSG00000004059	1944.36	-0.097621	0.146521	-0.666258	0.505246	0.733189	ARF5	-0.666258
ENSG00000165527	2864.36	-0.378225	0.112226	-3.37021	0.000751107	0.0074417	ARF6	-3.37021
ENSG00000101199	1324.1	0.0211427	0.10872	0.194469	0.845808	0.932054	ARFGAP1	0.194469
ENSG00000149182	1061.37	0.106085	0.129569	0.818756	0.412926	0.660954	ARFGAP2	0.818756
ENSG00000242247	1317.44	-0.160794	0.114168	-1.4084	0.159012	0.375577	ARFGAP3	-1.4084
ENSG00000066777	2818.18	-0.201607	0.124135	-1.6241	0.104354	0.288069	ARFGEF1	-1.6241
ENSG00000124198	3186	-0.0683335	0.0775665	-0.880968	0.378335	0.630472	ARFGEF2	-0.880968
ENSG00000164144	393.185	0.277266	0.250343	1.10755	0.268057	0.520304	ARFIP1	1.10755
ENSG00000132254	1668.59	-0.116688	0.125618	-0.928912	0.352934	0.60846	ARFIP2	-0.928912
ENSG00000101246	445.184	0.230726	0.152827	1.50972	0.131115	0.33423	ARFRP1	1.50972
ENSG00000134884	2252.72	-0.269605	0.16546	-1.62943	0.103223	0.285858	ARGLU1	-1.62943
ENSG00000175220	1265.79	0.581472	0.11002	5.28516	1.26e-07	4.7e-06	ARHGAP1	5.28516
ENSG00000071205	388.716	0.458139	0.183685	2.49416	0.0126257	0.0665843	ARHGAP10	2.49416
ENSG00000198826	1833.45	0.679707	0.276237	2.46059	0.0138707	0.0710812	ARHGAP11A	2.46059
ENSG00000285077	421.508	0.223737	0.197815	1.13104	0.258036	0.507455	ARHGAP11B	1.13104
ENSG00000165322	894.492	-0.155746	0.136688	-1.13942	0.254527	0.503497	ARHGAP12	-1.13942
ENSG00000140750	1782.33	-0.162853	0.153831	-1.05865	0.289758	0.542676	ARHGAP17	-1.05865
ENSG00000146376	336.013	0.0649358	0.168699	0.384922	0.700295	0.862185	ARHGAP18	0.384922
ENSG00000213390	1416.76	-0.168196	0.115498	-1.45627	0.145318	0.354846	ARHGAP19	-1.45627
ENSG00000107863	1932.41	0.295145	0.108807	2.71254	0.00667691	0.0411501	ARHGAP21	2.71254
ENSG00000275832	389.903	0.43453	0.289653	1.50017	0.13357	0.337754	ARHGAP23	1.50017
ENSG00000138639	400.315	0.372212	0.175082	2.12593	0.0335088	0.133343	ARHGAP24	2.12593
ENSG00000145819	1937.51	0.77626	0.324503	2.39215	0.0167501	0.0809167	ARHGAP26	2.39215
ENSG00000159314	722.119	-0.232076	0.126109	-1.84028	0.0657275	0.211816	ARHGAP27	-1.84028
ENSG00000215769	98.1601	-0.0315661	0.346998	-0.0909692	0.927517	0.969891	ARHGAP27P1	-0.0909692
ENSG00000137962	11640.9	-0.0477426	0.11104	-0.42996	0.667225	0.842468	ARHGAP29	-0.42996
ENSG00000031081	446.821	0.115002	0.17045	0.674696	0.499869	0.729572	ARHGAP31	0.674696
ENSG00000134909	1297.91	-0.0187868	0.120316	-0.156145	0.875919	0.94692	ARHGAP32	-0.156145
ENSG00000004777	277.572	-0.142053	0.232755	-0.61031	0.541657	0.760196	ARHGAP33	-0.61031
ENSG00000160007	3276.45	-0.0259193	0.195864	-0.132333	0.894721	0.955021	ARHGAP35	-0.132333
ENSG00000147799	405.863	-0.306419	0.143943	-2.12875	0.0332751	0.132573	ARHGAP39	-2.12875
ENSG00000089820	2368.09	-0.458312	0.112025	-4.09116	4.29e-05	0.000721864	ARHGAP4	-4.09116
ENSG00000165895	382.416	0.413345	0.193435	2.13687	0.0326089	0.130521	ARHGAP42	2.13687
ENSG00000180448	637.337	0.0802602	0.171	0.469358	0.638814	0.824055	ARHGAP45	0.469358
ENSG00000100852	2139.86	0.358752	0.153485	2.33737	0.0194198	0.0900854	ARHGAP5	2.33737
ENSG00000241484	83.3848	0.274358	0.300701	0.912394	0.361561	0.616848	ARHGAP8	0.912394
ENSG00000141522	4290.44	0.189962	0.165383	1.14862	0.250713	0.498721	ARHGDIA	1.14862
ENSG00000076928	1430.3	0.198079	0.134108	1.47701	0.139672	0.347049	ARHGEF1	1.47701
ENSG00000104728	967.943	-0.0970901	0.097317	-0.997669	0.31844	0.572665	ARHGEF10	-0.997669
ENSG00000074964	153.598	-0.488829	0.279078	-1.75159	0.0798444	0.240296	ARHGEF10L	-1.75159
ENSG00000132694	2362.96	-0.212264	0.109218	-1.94349	0.0519569	0.180498	ARHGEF11	-1.94349
ENSG00000196914	9388.58	-0.311754	0.152829	-2.03989	0.0413613	0.154929	ARHGEF12	-2.03989
ENSG00000130762	410.529	0.170924	0.159871	1.06914	0.285006	0.537533	ARHGEF16	1.06914
ENSG00000110237	1338.88	-0.641689	0.159925	-4.01242	6.01e-05	0.000948807	ARHGEF17	-4.01242
ENSG00000104880	1645.59	0.238019	0.112393	2.11773	0.0341981	0.13538	ARHGEF18	2.11773
ENSG00000142632	340.139	-0.221796	0.167793	-1.32184	0.18622	0.417066	ARHGEF19	-1.32184
ENSG00000116584	2188.82	-0.0142849	0.125311	-0.113996	0.909241	0.961463	ARHGEF2	-0.113996
ENSG00000240771	285.683	-0.98062	0.241505	-4.06046	4.9e-05	0.000803923	ARHGEF25	-4.06046
ENSG00000214944	1763.09	0.245642	0.1176	2.0888	0.036726	0.142238	ARHGEF28	2.0888
ENSG00000163947	700.882	0.176672	0.177112	0.997515	0.318515	0.572665	ARHGEF3	0.997515
ENSG00000204959	1076.03	-0.205105	0.123287	-1.66364	0.0961843	0.272343	ARHGEF34P	-1.66364
ENSG00000213214	566.922	-0.412029	0.153639	-2.6818	0.00732283	0.0439569	ARHGEF35	-2.6818
ENSG00000183111	153.762	-1.07039	0.348886	-3.06802	0.00215484	0.0171532	ARHGEF37	-3.06802
ENSG00000137135	542.015	0.415346	0.352679	1.17769	0.238921	0.484688	ARHGEF39	1.17769
ENSG00000165801	491.922	-0.512495	0.1404	-3.65026	0.000261977	0.00319541	ARHGEF40	-3.65026
ENSG00000050327	1118.19	-0.219976	0.192109	-1.14505	0.252187	0.500164	ARHGEF5	-1.14505
ENSG00000129675	1867.27	-0.748222	0.117	-6.39503	1.61e-10	1.2e-08	ARHGEF6	-6.39503
ENSG00000102606	1301.33	-0.0932293	0.124709	-0.747573	0.454718	0.695105	ARHGEF7	-0.747573
ENSG00000131089	391.935	-0.412776	0.200374	-2.06002	0.0393962	0.149373	ARHGEF9	-2.06002
ENSG00000117713	5280.14	-0.00108021	0.118352	-0.00912711	0.992718	0.997417	ARID1A	-0.00912711
ENSG00000049618	2014.88	-0.298286	0.190039	-1.5696	0.116507	0.310382	ARID1B	-1.5696
ENSG00000189079	1733.62	-0.290714	0.118892	-2.44519	0.0144775	0.0730871	ARID2	-2.44519
ENSG00000116017	540.982	-0.540404	0.142001	-3.80565	0.000141434	0.00192507	ARID3A	-3.80565
ENSG00000179361	534.74	0.415324	0.217476	1.90974	0.0561665	0.19081	ARID3B	1.90974
ENSG00000032219	507.76	-0.312644	0.197048	-1.58664	0.112594	0.302996	ARID4A	-1.58664
ENSG00000054267	1733.92	-0.309704	0.253175	-1.22328	0.221223	0.463458	ARID4B	-1.22328
ENSG00000196843	176.585	-0.313925	0.214463	-1.46377	0.143257	0.352632	ARID5A	-1.46377
ENSG00000150347	880.664	-0.22737	0.117874	-1.92893	0.0537396	0.184829	ARID5B	-1.92893
ENSG00000166233	1449.01	-0.106799	0.11626	-0.918623	0.358293	0.613594	ARIH1	-0.918623
ENSG00000177479	2026.11	0.262789	0.0976179	2.69201	0.0071022	0.0430098	ARIH2	2.69201
ENSG00000120805	1480.54	-0.239194	0.0970739	-2.46404	0.013738	0.070648	ARL1	-2.46404
ENSG00000175414	261.972	-0.773095	0.299961	-2.57732	0.00995704	0.0555205	ARL10	-2.57732
ENSG00000169379	719.709	-0.165726	0.173796	-0.953565	0.340304	0.595188	ARL13B	-0.953565
ENSG00000179674	105.395	2.248	0.297496	7.5564	4.14e-14	5.79e-12	ARL14	7.5564
ENSG00000152219	653.895	-0.18693	0.140997	-1.32577	0.184917	0.41484	ARL14EP	-1.32577
ENSG00000185305	302.158	-0.782826	0.16727	-4.68001	2.87e-06	7.33e-05	ARL15	-4.68001
ENSG00000214087	390.441	0.261988	0.138363	1.89348	0.0582942	0.195786	ARL16	1.89348
ENSG00000185829	419.604	-0.184681	0.148412	-1.24438	0.21336	0.453333	ARL17A	-1.24438
ENSG00000228696	101.647	-0.227591	0.26455	-0.860294	0.389627	0.640496	ARL17A	-0.860294
ENSG00000213465	1422.01	-0.261365	0.183578	-1.42373	0.154525	0.368841	ARL2	-1.42373
ENSG00000102931	747.825	-0.191829	0.393685	-0.487264	0.626071	0.81589	ARL2BP	-0.487264
ENSG00000138175	1300.84	-0.313326	0.107953	-2.90244	0.00370264	0.0261584	ARL3	-2.90244
ENSG00000122644	607.021	0.161657	0.285955	0.565322	0.571855	0.781574	ARL4A	0.565322
ENSG00000188042	6628.8	-0.444427	0.0685499	-6.48327	8.98e-11	7.12e-09	ARL4C	-6.48327
ENSG00000175906	88.6336	-0.237895	0.328195	-0.724859	0.468539	0.705899	ARL4D	-0.724859
ENSG00000162980	1192.73	-0.373209	0.133717	-2.79103	0.005254	0.0342416	ARL5A	-2.79103
ENSG00000165997	947.734	-0.209172	0.173315	-1.20689	0.227475	0.471117	ARL5B	-1.20689
ENSG00000113966	295.713	-0.580163	0.220925	-2.62606	0.00863795	0.0499039	ARL6	-2.62606
ENSG00000170540	8945.36	-0.178199	0.158106	-1.12708	0.259708	0.510093	ARL6IP1	-1.12708
ENSG00000182196	1086.45	-0.203318	0.135844	-1.4967	0.134471	0.339322	ARL6IP4	-1.4967
ENSG00000144746	1814.83	0.136299	0.146514	0.930278	0.352227	0.607688	ARL6IP5	0.930278
ENSG00000177917	886.599	-0.168638	0.154654	-1.09042	0.275529	0.528549	ARL6IP6	-1.09042
ENSG00000143862	855.778	-0.395996	0.133973	-2.95578	0.00311879	0.0228639	ARL8A	-2.95578
ENSG00000134108	2060.43	0.365035	0.568851	0.641706	0.521064	0.745531	ARL8B	0.641706
ENSG00000104442	1728.23	-0.178241	0.176333	-1.01082	0.312102	0.565775	ARMC1	-1.01082
ENSG00000170632	1271.82	-0.318315	0.159412	-1.99681	0.0458459	0.166435	ARMC10	-1.99681
ENSG00000118690	166.208	-0.557015	0.268639	-2.07347	0.0381284	0.145735	ARMC2	-2.07347
ENSG00000140691	420.655	-0.0250564	0.373662	-0.0670563	0.946537	0.978284	ARMC5	-0.0670563
ENSG00000105676	776.84	0.601992	0.222219	2.70901	0.00674851	0.0414254	ARMC6	2.70901
ENSG00000125449	668.863	0.17482	0.332129	0.526361	0.598637	0.79955	ARMC7	0.526361
ENSG00000114098	1833.04	0.140524	0.0892164	1.57509	0.115235	0.308073	ARMC8	1.57509
ENSG00000135931	895.927	-0.459592	0.11445	-4.01565	5.93e-05	0.000940313	ARMC9	-4.01565
ENSG00000126947	321.964	0.357097	0.173291	2.06068	0.0393334	0.149306	ARMCX1	2.06068
ENSG00000184867	56.9159	-0.106138	0.445426	-0.238284	0.81166	0.916599	ARMCX2	-0.238284
ENSG00000102401	911.887	-0.351517	0.356571	-0.985826	0.324219	0.578443	ARMCX3	-0.985826
ENSG00000196440	124.981	0.730597	0.624719	1.16948	0.24221	0.488736	ARMCX4	1.16948
ENSG00000125962	516.316	1.04701	0.484574	2.16069	0.0307193	0.124821	ARMCX5	2.16069
ENSG00000198960	518.337	-0.333801	0.20357	-1.63974	0.10106	0.282111	ARMCX6	-1.63974
ENSG00000120029	1152.59	-0.153296	0.117732	-1.30207	0.192892	0.426606	ARMH3	-1.30207
ENSG00000146476	749.227	-0.288733	0.388355	-0.743477	0.457193	0.696958	ARMT1	-0.743477
ENSG00000143437	1336.84	-0.0651349	0.150643	-0.432379	0.665466	0.841962	ARNT	-0.432379
ENSG00000172379	690.139	-0.53288	0.247417	-2.15378	0.0312577	0.126439	ARNT2	-2.15378
ENSG00000133794	171.489	0.0309406	0.207246	0.149294	0.881322	0.94914	ARNTL	0.149294
ENSG00000029153	1704.92	0.21568	0.272839	0.790503	0.429234	0.674439	ARNTL2	0.790503
ENSG00000241685	4894.74	-0.154972	0.11125	-1.393	0.16362	0.382362	ARPC1A	-1.393
ENSG00000130429	5130.09	-0.259549	0.148556	-1.74715	0.0806122	0.24165	ARPC1B	-1.74715
ENSG00000163466	5727.75	0.313066	0.135224	2.31516	0.0206042	0.0941059	ARPC2	2.31516
ENSG00000111229	6680.18	-0.15687	0.144216	-1.08775	0.276706	0.52953	ARPC3	-1.08775
ENSG00000241553	2322.75	0.100314	0.121063	0.828614	0.407323	0.656552	ARPC4	0.828614
ENSG00000250151	52.8582	0.133442	0.532347	0.250667	0.802072	0.91294	ARPC4-TTLL3	0.250667
ENSG00000162704	3497.84	-0.073555	0.221248	-0.332454	0.739546	0.884858	ARPC5	-0.332454
ENSG00000136950	1206.75	0.321942	0.140686	2.28838	0.0221155	0.0989662	ARPC5L	2.28838
ENSG00000242498	564.356	-0.595913	0.174065	-3.4235	0.000618204	0.00637643	ARPIN	-3.4235
ENSG00000128989	3657.54	-0.43498	0.161272	-2.69719	0.00699279	0.0425289	ARPP19	-2.69719
ENSG00000137486	6218.85	-1.15122	0.10813	-10.6466	1.81e-26	1.56e-23	ARRB1	-10.6466
ENSG00000141480	490.456	-0.206234	0.187486	-1.1	0.271332	0.524201	ARRB2	-1.1
ENSG00000197070	496.284	-0.762495	0.15608	-4.88527	1.03e-06	2.95e-05	ARRDC1	-4.88527
ENSG00000203993	235.126	0.369041	0.197942	1.86439	0.0622671	0.204111	ARRDC1-AS1	1.86439
ENSG00000105643	571.255	0.12994	0.158157	0.821588	0.411311	0.659221	ARRDC2	0.821588
ENSG00000113369	2270.22	0.528298	0.267139	1.97762	0.0479718	0.17181	ARRDC3	1.97762
ENSG00000140450	326.053	0.622364	0.23824	2.61234	0.00899237	0.0514275	ARRDC4	2.61234
ENSG00000100299	569.253	-0.279895	0.118513	-2.36171	0.0181907	0.0860871	ARSA	-2.36171
ENSG00000113273	705.999	-0.381478	0.112147	-3.4016	0.000669928	0.00681085	ARSB	-3.4016
ENSG00000006756	430.128	-0.295835	0.173987	-1.70033	0.089069	0.257889	ARSD	-1.70033
ENSG00000183876	1207.2	2.38765	0.14581	16.3751	2.88e-60	5.72e-56	ARSI	16.3751
ENSG00000180801	1262.22	0.00501854	0.116835	0.0429542	0.965738	0.985996	ARSJ	0.0429542
ENSG00000164291	552.117	0.157271	0.211626	0.743156	0.457387	0.697089	ARSK	0.743156
ENSG00000173409	661.668	-0.251716	0.177693	-1.41658	0.156606	0.371967	ARV1	-1.41658
ENSG00000099889	159.03	-0.0196384	0.210816	-0.0931541	0.925781	0.969211	ARVCF	-0.0931541
ENSG00000214435	341.521	-0.758323	0.229779	-3.30023	0.000966046	0.00912914	AS3MT	-3.30023
ENSG00000104763	588.263	-0.457022	0.182814	-2.49993	0.0124218	0.0657714	ASAH1	-2.49993
ENSG00000188611	144.326	0.740682	0.427321	1.73331	0.0830397	0.246253	ASAH2	1.73331
ENSG00000204147	128.792	0.579435	0.322827	1.79487	0.0726738	0.226052	ASAH2B	1.79487
ENSG00000153317	4345.48	-0.0652399	0.110513	-0.590337	0.554965	0.769389	ASAP1	-0.590337
ENSG00000151693	4170.24	0.185234	0.075174	2.46407	0.0137369	0.070648	ASAP2	2.46407
ENSG00000088280	450.61	-0.698236	0.165458	-4.22001	2.44e-05	0.000452236	ASAP3	-4.22001
ENSG00000065802	1317.5	0.780165	0.60642	1.28651	0.198265	0.433132	ASB1	1.28651
ENSG00000196372	388.445	-0.0923065	0.154	-0.599391	0.548912	0.764808	ASB13	-0.599391
ENSG00000267080	71.6711	-0.659195	0.352417	-1.8705	0.0614147	0.202152	ASB16-AS1	-1.8705
ENSG00000115239	404.806	-0.0860782	0.161581	-0.532726	0.594224	0.797051	ASB3	-0.532726
ENSG00000148331	615.553	0.97486	0.249331	3.90989	9.23e-05	0.00136442	ASB6	3.90989
ENSG00000183475	698.033	0.06688	0.128818	0.51918	0.603635	0.802784	ASB7	0.51918
ENSG00000177981	403.129	0.0174381	0.174181	0.100115	0.920253	0.967033	ASB8	0.100115
ENSG00000102048	190.969	-0.0365172	0.273792	-0.133376	0.893896	0.954885	ASB9	-0.133376
ENSG00000138303	1789.38	-0.086451	0.157501	-0.548892	0.58308	0.789216	ASCC1	-0.548892
ENSG00000100325	1026.43	0.21953	0.124656	1.76109	0.0782235	0.236819	ASCC2	1.76109
ENSG00000112249	3094.3	-0.27978	0.0922425	-3.03309	0.0024206	0.0186914	ASCC3	-3.03309
ENSG00000111875	782.195	0.0823515	0.147317	0.559008	0.576156	0.78502	ASF1A	0.559008
ENSG00000105011	704.528	0.160509	0.211269	0.759738	0.447411	0.690043	ASF1B	0.759738
ENSG00000116539	3191.33	-0.0352838	0.0934196	-0.377691	0.70566	0.865924	ASH1L	-0.377691
ENSG00000235919	29.4107	0.394302	0.464446	0.848973	0.395896	0.646176	ASH1L-AS1	0.848973
ENSG00000129691	587.11	-0.132918	0.144061	-0.922654	0.356188	0.611387	ASH2L	-0.922654
ENSG00000110881	247.196	0.0794137	0.207694	0.38236	0.702195	0.863381	ASIC1	0.38236
ENSG00000108684	114.271	1.02908	0.302222	3.40504	0.00066154	0.00674629	ASIC2	3.40504
ENSG00000126522	727.804	-0.00297225	0.129295	-0.0229881	0.98166	0.992411	ASL	-0.0229881
ENSG00000169093	302.694	-0.353556	0.217735	-1.62379	0.104421	0.28813	ASMTL	-1.62379
ENSG00000198356	1297.42	0.087262	0.117762	0.741002	0.458692	0.697957	ASNA1	0.741002
ENSG00000070669	2673.13	-0.375117	0.227376	-1.64977	0.0989909	0.278293	ASNS	-1.64977
ENSG00000138381	1055.49	0.0134933	0.267925	0.0503624	0.959834	0.983625	ASNSD1	0.0503624
ENSG00000198363	8656.43	-0.190234	0.13462	-1.41313	0.157619	0.37362	ASPH	-1.41313
ENSG00000174939	647.864	-0.292741	0.187042	-1.56511	0.117557	0.312012	ASPHD1	-1.56511
ENSG00000066279	2051.24	0.278277	0.202345	1.37526	0.169051	0.391157	ASPM	1.37526
ENSG00000169696	596.971	-0.171628	0.144935	-1.18417	0.236345	0.481547	ASPSCR1	-1.18417
ENSG00000162174	565.117	-0.377883	0.200933	-1.88064	0.0600208	0.199393	ASRGL1	-1.88064
ENSG00000130707	525.565	-1.02316	0.285199	-3.58753	0.000333831	0.00388784	ASS1	-3.58753
ENSG00000034533	279.993	0.555574	0.206468	2.69085	0.00712707	0.0430951	ASTE1	2.69085
ENSG00000148219	80.3001	-0.0951324	0.324697	-0.292988	0.769531	0.898521	ASTN2	-0.292988
ENSG00000171456	2096.08	0.0991104	0.176451	0.561689	0.574328	0.783659	ASXL1	0.561689
ENSG00000143970	2351	-0.0680162	0.0943737	-0.720711	0.471087	0.707515	ASXL2	-0.720711
ENSG00000138138	2151.72	-0.102645	0.160369	-0.640054	0.522137	0.746213	ATAD1	-0.640054
ENSG00000156802	3015.49	0.332549	0.141586	2.34875	0.0188366	0.0881217	ATAD2	2.34875
ENSG00000119778	722.947	-0.296514	0.116527	-2.54459	0.0109405	0.0596305	ATAD2B	-2.54459
ENSG00000197785	1234.64	0.400729	0.179449	2.2331	0.0255422	0.109834	ATAD3A	2.2331
ENSG00000160072	2210.72	0.618177	0.154887	3.99116	6.58e-05	0.00102579	ATAD3B	3.99116
ENSG00000215915	434.419	0.332651	0.176259	1.88728	0.0591224	0.197523	ATAD3C	1.88728
ENSG00000176208	456.256	0.500794	0.176409	2.83882	0.00452808	0.0305542	ATAD5	2.83882
ENSG00000137343	257.5	0.0638555	0.249652	0.255778	0.798122	0.911058	ATAT1	0.255778
ENSG00000107669	1469.15	-0.199679	0.0961787	-2.07612	0.0378829	0.145013	ATE1	-2.07612
ENSG00000123268	747.684	0.0409241	0.15276	0.267899	0.788777	0.907753	ATF1	0.267899
ENSG00000115966	1543.3	-0.352672	0.219393	-1.60749	0.107947	0.294623	ATF2	-1.60749
ENSG00000162772	485.577	1.08351	0.490867	2.20734	0.0272901	0.115449	ATF3	2.20734
ENSG00000128272	5174.51	-0.121566	0.189626	-0.641086	0.521467	0.745846	ATF4	-0.641086
ENSG00000169136	1914.22	-0.806673	0.557068	-1.44807	0.147598	0.35834	ATF5	-1.44807
ENSG00000118217	1919.66	-0.0131732	0.105809	-0.1245	0.900919	0.957568	ATF6	-0.1245
ENSG00000213676	2845.91	-0.169244	0.102813	-1.64613	0.0997363	0.279834	ATF6B	-1.64613
ENSG00000170653	1367.23	-0.236205	0.10234	-2.30803	0.0209973	0.0953529	ATF7	-2.30803
ENSG00000171681	837.445	-0.170543	0.143285	-1.19023	0.233955	0.478544	ATF7IP	-1.19023
ENSG00000166669	454.327	-0.265872	0.17361	-1.53144	0.125662	0.325768	ATF7IP2	-1.53144
ENSG00000152348	472.95	-0.367351	0.156765	-2.34332	0.019113	0.0890789	ATG10	-2.34332
ENSG00000123395	1414.07	0.445347	0.139147	3.20055	0.00137165	0.0121087	ATG101	3.20055
ENSG00000145782	1224.85	-0.0257759	0.145967	-0.176588	0.859832	0.9395	ATG12	-0.176588
ENSG00000175224	1838.2	0.110917	0.150031	0.739296	0.459727	0.6983	ATG13	0.739296
ENSG00000126775	495.018	-0.0806713	0.158377	-0.509361	0.610499	0.806937	ATG14	-0.509361
ENSG00000085978	1642.11	0.399175	0.125559	3.17917	0.00147699	0.0128293	ATG16L1	3.17917
ENSG00000168010	217.549	-0.636813	0.281783	-2.25994	0.023825	0.10412	ATG16L2	-2.25994
ENSG00000110046	979.992	-0.0953763	0.125748	-0.758471	0.448169	0.690391	ATG2A	-0.758471
ENSG00000066739	276.182	0.26335	0.234866	1.12128	0.262168	0.51314	ATG2B	1.12128
ENSG00000144848	2105.84	0.251452	0.144792	1.73665	0.0824498	0.245117	ATG3	1.73665
ENSG00000101844	578.737	0.442619	0.188348	2.35001	0.0187728	0.0879478	ATG4A	2.35001
ENSG00000168397	1524	-0.019837	0.124427	-0.159426	0.873333	0.945509	ATG4B	-0.159426
ENSG00000125703	295.702	-0.0834403	0.170747	-0.488677	0.62507	0.815209	ATG4C	-0.488677
ENSG00000130734	264.981	0.312347	0.159033	1.96403	0.0495263	0.175196	ATG4D	1.96403
ENSG00000057663	2010.4	0.0774047	0.102518	0.755038	0.450226	0.691597	ATG5	0.755038
ENSG00000197548	733.113	0.650043	0.120852	5.37883	7.5e-08	2.96e-06	ATG7	5.37883
ENSG00000198925	1918	-0.360044	0.109335	-3.29302	0.000991164	0.00934425	ATG9A	-3.29302
ENSG00000138363	4705.59	0.183724	0.163408	1.12432	0.260876	0.511316	ATIC	1.12432
ENSG00000198513	59.5529	-0.205181	0.312041	-0.657545	0.510831	0.737429	ATL1	-0.657545
ENSG00000119787	1386.8	0.00855879	0.129712	0.0659828	0.947392	0.978624	ATL2	0.0659828
ENSG00000184743	2831.17	-0.132442	0.0778621	-1.70099	0.0889453	0.257719	ATL3	-1.70099
ENSG00000149311	4152.94	-0.623278	0.209862	-2.96994	0.00297855	0.022031	ATM	-2.96994
ENSG00000166454	1793.8	0.0422442	0.121174	0.348623	0.727372	0.877991	ATMIN	0.348623
ENSG00000111676	2990.6	0.105964	0.0945251	1.12102	0.262281	0.51328	ATN1	1.12102
ENSG00000177556	1371.76	0.0689227	0.107579	0.640671	0.521736	0.746116	ATOX1	0.640671
ENSG00000145246	464.783	0.172987	0.176994	0.977362	0.32839	0.582719	ATP10D	0.977362
ENSG00000068650	2119.76	-0.564258	0.08918	-6.32718	2.5e-10	1.79e-08	ATP11A	-6.32718
ENSG00000058063	3309.31	-0.181235	0.164232	-1.10353	0.269798	0.522122	ATP11B	-1.10353
ENSG00000101974	2179.11	-0.427303	0.111284	-3.83974	0.000123163	0.00172318	ATP11C	-3.83974
ENSG00000105726	843.765	0.0464284	0.098574	0.471001	0.63764	0.823202	ATP13A1	0.471001
ENSG00000159363	1034.37	0.04056	0.109509	0.370382	0.711098	0.868415	ATP13A2	0.370382
ENSG00000133657	6485.04	0.232567	0.216293	1.07524	0.282268	0.53506	ATP13A3	1.07524
ENSG00000163399	5508.53	0.160142	0.0722666	2.21598	0.0266927	0.113649	ATP1A1	2.21598
ENSG00000203865	462.717	0.0971836	0.159301	0.610065	0.541819	0.760218	ATP1A1-AS1	0.610065
ENSG00000105409	146.923	0.125556	0.225325	0.557225	0.577374	0.785687	ATP1A3	0.557225
ENSG00000143153	2416.06	-0.202906	0.132759	-1.52838	0.126418	0.327046	ATP1B1	-1.52838
ENSG00000069849	2547.99	-0.298633	0.127864	-2.33555	0.0195148	0.0903574	ATP1B3	-2.33555
ENSG00000166896	229.727	-0.202208	0.205646	-0.983283	0.325468	0.579639	ATP23	-0.983283
ENSG00000260442	15.5524	0.222271	0.710181	0.312979	0.754297	0.892448	ATP2A1-AS1	0.312979
ENSG00000174437	8337.59	-0.0353055	0.190129	-0.185692	0.852686	0.935597	ATP2A2	-0.185692
ENSG00000074370	388.524	-1.24037	0.269818	-4.59705	4.29e-06	0.000102845	ATP2A3	-4.59705
ENSG00000070961	2399.47	-0.165409	0.0839812	-1.9696	0.0488846	0.173669	ATP2B1	-1.9696
ENSG00000058668	2585.15	-0.382383	0.139262	-2.74579	0.00603658	0.0380992	ATP2B4	-2.74579
ENSG00000017260	4694.77	-0.13907	0.084254	-1.65061	0.0988183	0.277927	ATP2C1	-1.65061
ENSG00000152234	5466.12	-0.324124	0.0887867	-3.65059	0.000261634	0.00319319	ATP5F1A	-3.65059
ENSG00000110955	14913.8	-0.0872223	0.144954	-0.601723	0.547359	0.763877	ATP5F1B	-0.601723
ENSG00000165629	3232.18	0.00609559	0.125	0.0487646	0.961107	0.984167	ATP5F1C	0.0487646
ENSG00000099624	766.603	-0.253701	0.135465	-1.87281	0.0610948	0.201467	ATP5F1D	-1.87281
ENSG00000124172	5308.18	-0.0599504	0.120981	-0.495534	0.620223	0.813075	ATP5F1E	-0.495534
ENSG00000130770	1135.35	0.0334916	0.119162	0.281059	0.778665	0.902658	ATP5IF1	0.281059
ENSG00000159199	2761.38	0.423945	0.215739	1.96509	0.0494043	0.175045	ATP5MC1	1.96509
ENSG00000135390	2138.19	-0.0808321	0.136884	-0.590516	0.554845	0.769294	ATP5MC2	-0.590516
ENSG00000154518	3530.1	0.0393707	0.121319	0.324521	0.745544	0.887677	ATP5MC3	0.324521
ENSG00000173915	3572.66	0.218039	0.139769	1.56	0.118761	0.314073	ATP5MD	1.56
ENSG00000169020	1975.51	-0.352985	0.111608	-3.16271	0.00156306	0.0133243	ATP5ME	-3.16271
ENSG00000241468	2442.04	-0.270942	0.139459	-1.9428	0.05204	0.180583	ATP5MF	-1.9428
ENSG00000248919	95.626	-0.402373	0.310594	-1.2955	0.195149	0.429158	ATP5MF-PTCD1	-1.2955
ENSG00000167283	3626.96	-0.115843	0.154496	-0.749813	0.453367	0.694197	ATP5MG	-0.749813
ENSG00000156411	843.483	0.0628375	0.181198	0.34679	0.728749	0.878616	ATP5MPL	0.34679
ENSG00000116459	2825.87	0.213503	0.119309	1.7895	0.073535	0.227554	ATP5PB	1.7895
ENSG00000167863	4432.41	-0.221513	0.139575	-1.58706	0.1125	0.302843	ATP5PD	-1.58706
ENSG00000154723	1809.17	-0.00419711	0.156288	-0.026855	0.978575	0.991921	ATP5PF	-0.026855
ENSG00000241837	2553.08	-0.134305	0.233082	-0.576211	0.564473	0.776243	ATP5PO	-0.576211
ENSG00000198899	45452.1	0.308224	0.124009	2.48551	0.0129366	0.0678096	ATP6	2.48551
ENSG00000071553	5177.11	-0.432537	0.103124	-4.19432	2.74e-05	0.000494221	ATP6AP1	-4.19432
ENSG00000182220	599.524	-0.334558	0.182644	-1.83175	0.0669887	0.214585	ATP6AP2	-1.83175
ENSG00000033627	1194.26	0.154897	0.198368	0.780859	0.434885	0.679173	ATP6V0A1	0.780859
ENSG00000185344	804.107	0.087549	0.121251	0.72205	0.470264	0.706838	ATP6V0A2	0.72205
ENSG00000117410	1330.41	0.567616	0.109938	5.16308	2.43e-07	8.41e-06	ATP6V0B	5.16308
ENSG00000185883	2237.97	-0.154916	0.325468	-0.47598	0.634089	0.821437	ATP6V0C	-0.47598
ENSG00000159720	1258.01	0.00512433	0.201821	0.0253905	0.979744	0.991943	ATP6V0D1	0.0253905
ENSG00000113732	4814.5	0.0362755	0.122105	0.297086	0.766401	0.897188	ATP6V0E1	0.297086
ENSG00000171130	988.164	0.19283	0.148113	1.30191	0.192947	0.426634	ATP6V0E2	1.30191
ENSG00000204934	80.7294	1.53444	0.307936	4.983	6.26e-07	1.91e-05	ATP6V0E2-AS1	4.983
ENSG00000114573	2886.95	0.140633	0.115865	1.21376	0.224837	0.467737	ATP6V1A	1.21376
ENSG00000147416	1362.14	0.223115	0.133748	1.66818	0.0952799	0.270312	ATP6V1B2	1.66818
ENSG00000155097	3286.74	0.51352	0.205247	2.50196	0.0123508	0.0654826	ATP6V1C1	2.50196
ENSG00000143882	335.118	-1.19336	1.14302	-1.04405	0.296463	0.550075	ATP6V1C2	-1.04405
ENSG00000100554	1220.42	-0.0131691	0.256521	-0.0513373	0.959057	0.983487	ATP6V1D	-0.0513373
ENSG00000131100	2737.59	0.00543621	0.0997809	0.0544815	0.956552	0.98252	ATP6V1E1	0.0544815
ENSG00000250565	227.322	-0.112513	0.17385	-0.647182	0.517514	0.742862	ATP6V1E2	-0.647182
ENSG00000128524	1750.17	0.0241541	0.127671	0.189191	0.849943	0.934122	ATP6V1F	0.189191
ENSG00000136888	1724.39	0.0964798	0.143744	0.67119	0.5021	0.731057	ATP6V1G1	0.67119
ENSG00000213760	36.4728	1.51298	0.532473	2.84143	0.00449118	0.0303478	ATP6V1G2	2.84143
ENSG00000254870	358.364	0.576105	0.260531	2.21127	0.0270171	0.114585	ATP6V1G2-DDX39B	2.21127
ENSG00000047249	800.681	0.0764216	0.166543	0.458871	0.646327	0.829863	ATP6V1H	0.458871
ENSG00000165240	1105.66	-0.585578	0.10196	-5.7432	9.29e-09	4.57e-07	ATP7A	-5.7432
ENSG00000123191	498.915	-0.69739	0.18898	-3.69029	0.000223995	0.00282549	ATP7B	-3.69029
ENSG00000228253	32113	0.299936	0.131941	2.27326	0.0230103	0.101611	ATP8	2.27326
ENSG00000081923	606.765	0.0385021	0.133789	0.287782	0.773513	0.90015	ATP8B1	0.287782
ENSG00000143515	598.009	-0.234387	0.174007	-1.347	0.177981	0.40454	ATP8B2	-1.347
ENSG00000130270	861.3	-0.14527	0.132264	-1.09834	0.272056	0.525088	ATP8B3	-1.09834
ENSG00000054793	709.99	-1.23053	0.302237	-4.07141	4.67e-05	0.000774739	ATP9A	-4.07141
ENSG00000166377	833.082	-0.363105	0.110789	-3.27744	0.00104752	0.00977316	ATP9B	-3.27744
ENSG00000123472	848.944	0.0390029	0.223854	0.174234	0.861682	0.940244	ATPAF1	0.174234
ENSG00000171953	274.881	-0.114994	0.17757	-0.6476	0.517244	0.742689	ATPAF2	-0.6476
ENSG00000175054	2087.36	-0.022172	0.100958	-0.219616	0.82617	0.923957	ATR	-0.219616
ENSG00000138085	1524.32	-0.0877889	0.104951	-0.836473	0.402889	0.65268	ATRAID	-0.836473
ENSG00000164053	304.549	0.309763	0.195295	1.58613	0.112709	0.30312	ATRIP	1.58613
ENSG00000088812	2983.56	-0.236983	0.106244	-2.23055	0.0257108	0.11044	ATRN	-2.23055
ENSG00000107518	204.559	-0.315885	0.188282	-1.67772	0.093401	0.266659	ATRNL1	-1.67772
ENSG00000085224	2364.93	-0.638449	0.196334	-3.25186	0.00114653	0.0105036	ATRX	-3.25186
ENSG00000124788	1942.17	-0.553033	0.117736	-4.69725	2.64e-06	6.81e-05	ATXN1	-4.69725
ENSG00000130638	2138.06	-0.18591	0.143301	-1.29733	0.194516	0.428301	ATXN10	-1.29733
ENSG00000224470	1401.56	-0.0197379	0.0953725	-0.206956	0.836044	0.927406	ATXN1L	-0.206956
ENSG00000204842	1220.51	0.0424753	0.0974981	0.435653	0.663089	0.84042	ATXN2	0.435653
ENSG00000168488	3286.94	0.199306	0.111399	1.78912	0.0735951	0.227633	ATXN2L	1.78912
ENSG00000066427	352.455	-0.523376	0.151567	-3.4531	0.000554179	0.00583122	ATXN3	-3.4531
ENSG00000163635	252.109	0.140784	0.607604	0.231704	0.816768	0.919124	ATXN7	0.231704
ENSG00000285258	233.312	0.48262	1.43373	0.336618	0.736405	0.883271	ATXN7	0.336618
ENSG00000146776	210.877	0.134293	0.246102	0.545682	0.585284	0.790887	ATXN7L1	0.545682
ENSG00000162650	119.471	0.0954242	0.213044	0.447909	0.654219	0.834132	ATXN7L2	0.447909
ENSG00000087152	1598.34	-0.245362	0.0892113	-2.75034	0.00595329	0.0377574	ATXN7L3	-2.75034
ENSG00000253719	1809.69	-0.328852	0.0984806	-3.33926	0.000840014	0.00813969	ATXN7L3B	-3.33926
ENSG00000148090	150.83	-0.362124	0.204434	-1.77135	0.0765024	0.232923	AUH	-1.77135
ENSG00000127423	272.925	0.673026	0.220317	3.0548	0.00225209	0.0177071	AUNIP	3.0548
ENSG00000115307	2678.27	0.315758	0.0992207	3.18238	0.00146071	0.0127196	AUP1	3.18238
ENSG00000087586	2915.77	0.712109	0.199977	3.56095	0.000369515	0.00422653	AURKA	3.56095
ENSG00000175756	2113.54	-0.0752621	0.152378	-0.493917	0.621365	0.813614	AURKAIP1	-0.493917
ENSG00000178999	499.057	0.181597	0.225954	0.80369	0.421576	0.668306	AURKB	0.80369
ENSG00000169857	559.449	0.201972	0.188135	1.07355	0.283026	0.535736	AVEN	1.07355
ENSG00000135407	70.4279	0.0410988	0.324789	0.12654	0.899305	0.956683	AVIL	0.12654
ENSG00000105778	2416.56	-0.351083	0.147732	-2.37648	0.0174787	0.0835012	AVL9	-2.37648
ENSG00000119986	172.09	0.740167	0.268113	2.76065	0.00576868	0.0368281	AVPI1	2.76065
ENSG00000126895	113.849	-0.294421	0.395393	-0.744629	0.456496	0.696216	AVPR2	-0.744629
ENSG00000103126	1264.65	-0.102844	0.117164	-0.877777	0.380065	0.631859	AXIN1	-0.877777
ENSG00000167601	4163.92	0.267009	0.153968	1.73419	0.0828852	0.245868	AXL	1.73419
ENSG00000163512	720.478	-0.0303222	0.201046	-0.150823	0.880116	0.948924	AZI2	-0.150823
ENSG00000155096	5816.18	0.0236153	0.0790256	0.298831	0.765069	0.897153	AZIN1	0.298831
ENSG00000253320	26.1299	0.245603	0.49929	0.491904	0.622787	0.81407	AZIN1-AS1	0.491904
ENSG00000172232	51.4034	-1.00271	0.394294	-2.54306	0.0109888	0.0598233	AZU1	-2.54306
ENSG00000166710	7137.06	-0.462619	0.761851	-0.60723	0.543698	0.76107	B2M	-0.60723
ENSG00000169255	802.776	-0.215137	0.161892	-1.32889	0.183883	0.413268	B3GALNT1	-1.32889
ENSG00000162885	1227.15	-0.178375	0.0934607	-1.90855	0.0563199	0.191152	B3GALNT2	-1.90855
ENSG00000235863	94.3285	-0.300302	0.24025	-1.24995	0.211316	0.450485	B3GALT4	-1.24995
ENSG00000176022	1164.98	-0.622198	0.115366	-5.39327	6.92e-08	2.77e-06	B3GALT6	-5.39327
ENSG00000149541	1093.09	-0.165648	0.12999	-1.27431	0.202552	0.438636	B3GAT3	-1.27431
ENSG00000187676	851.462	-0.325371	0.120918	-2.69084	0.00712715	0.0430951	B3GLCT	-2.69084
ENSG00000170340	496.03	-0.0615896	0.142845	-0.431164	0.666349	0.842215	B3GNT2	-0.431164
ENSG00000176597	1306.17	0.837959	0.345825	2.42307	0.0153898	0.0763144	B3GNT5	2.42307
ENSG00000156966	3848.6	0.138379	0.146548	0.944257	0.345038	0.599744	B3GNT7	0.944257
ENSG00000237172	280.57	-0.784221	0.187131	-4.19075	2.78e-05	0.000501596	B3GNT9	-4.19075
ENSG00000175711	664.078	0.134194	0.116041	1.15644	0.247502	0.494979	B3GNTL1	1.15644
ENSG00000135454	1288.1	-0.123447	0.122984	-1.00376	0.315492	0.569487	B4GALNT1	-1.00376
ENSG00000139044	112.758	-0.0956725	0.292712	-0.326849	0.743782	0.886987	B4GALNT3	-0.326849
ENSG00000182272	1574.95	-1.09185	0.188976	-5.77771	7.57e-09	3.8e-07	B4GALNT4	-5.77771
ENSG00000086062	2757.67	-0.0836584	0.123707	-0.676265	0.498873	0.728808	B4GALT1	-0.676265
ENSG00000117411	2003.34	0.067823	0.0946468	0.716591	0.473627	0.708849	B4GALT2	0.716591
ENSG00000158850	632.753	0.274173	0.160403	1.70928	0.0873989	0.254604	B4GALT3	1.70928
ENSG00000121578	650.353	0.297049	0.171234	1.73476	0.0827838	0.245677	B4GALT4	1.73476
ENSG00000158470	2811.4	-0.144761	0.116702	-1.24043	0.214815	0.455174	B4GALT5	-1.24043
ENSG00000118276	636.658	0.0105752	0.2123	0.0498127	0.960272	0.983718	B4GALT6	0.0498127
ENSG00000027847	508.747	0.0269723	0.218076	0.123683	0.901566	0.957649	B4GALT7	0.123683
ENSG00000174684	857.603	-0.762474	0.11562	-6.59464	4.26e-11	3.58e-09	B4GAT1	-6.59464
ENSG00000108641	208.51	-0.342807	0.161765	-2.11917	0.0340763	0.135087	B9D1	-2.11917
ENSG00000123810	66.9134	0.0279141	0.364981	0.0764812	0.939036	0.974949	B9D2	0.0764812
ENSG00000105393	902.411	-0.189678	0.126191	-1.5031	0.132812	0.336623	BABAM1	-1.5031
ENSG00000158019	788.145	0.0879812	0.145965	0.602754	0.546672	0.763328	BABAM2	0.602754
ENSG00000186318	482.177	-0.350607	0.165944	-2.11281	0.0346174	0.136388	BACE1	-2.11281
ENSG00000182240	368.073	-0.0368664	0.216978	-0.169909	0.865082	0.941704	BACE2	-0.169909
ENSG00000156273	502.753	0.0929958	0.172475	0.539183	0.589761	0.794126	BACH1	0.539183
ENSG00000002330	648.409	-0.441098	0.239528	-1.84153	0.0655434	0.211507	BAD	-1.84153
ENSG00000107262	950.169	0.417727	0.19662	2.12454	0.0336249	0.133711	BAG1	2.12454
ENSG00000112208	1470.03	0.197231	0.108853	1.8119	0.0700015	0.22033	BAG2	1.8119
ENSG00000151929	4587.28	0.413566	0.166734	2.48039	0.0131239	0.0685737	BAG3	2.48039
ENSG00000156735	220.789	0.380217	0.177756	2.13897	0.0324377	0.13002	BAG4	2.13897
ENSG00000166170	1025.28	-0.320043	0.12417	-2.57747	0.00995276	0.0555122	BAG5	-2.57747
ENSG00000204463	5905.19	0.0143813	0.149951	0.0959063	0.923595	0.968266	BAG6	0.0959063
ENSG00000266074	2068.51	-0.519356	0.114643	-4.53021	5.89e-06	0.000135817	BAHCC1	-4.53021
ENSG00000140320	1309.44	0.028705	0.148203	0.193687	0.846421	0.932174	BAHD1	0.193687
ENSG00000175866	1556.52	0.250212	0.186349	1.3427	0.179368	0.406714	BAIAP2	1.3427
ENSG00000226137	994.643	-0.872801	0.116011	-7.52345	5.33e-14	7.3e-12	BAIAP2-DT	-7.52345
ENSG00000006453	4558.56	0.0584365	0.105177	0.555601	0.578484	0.786356	BAIAP2L1	0.555601
ENSG00000007516	221.928	-0.084635	0.2794	-0.302917	0.761953	0.895725	BAIAP3	-0.302917
ENSG00000030110	1300.1	0.348445	0.122899	2.83522	0.00457946	0.0308484	BAK1	2.83522
ENSG00000095739	53.3147	-0.654481	0.418969	-1.56212	0.118259	0.313163	BAMBI	-1.56212
ENSG00000175334	1714.19	0.0968691	0.176428	0.549057	0.582966	0.789216	BANF1	0.549057
ENSG00000153064	99.6299	-0.63733	0.292915	-2.17581	0.0295692	0.121642	BANK1	-2.17581
ENSG00000172530	351.096	-0.00891883	0.227419	-0.0392175	0.968717	0.987737	BANP	-0.0392175
ENSG00000163930	1358.33	0.178215	0.211358	0.843189	0.399123	0.649175	BAP1	0.843189
ENSG00000138376	339.695	0.105972	0.154095	0.687705	0.491639	0.72362	BARD1	0.687705
ENSG00000131668	1315.37	-0.313065	0.108359	-2.88914	0.00386301	0.0270984	BARX1	-2.88914
ENSG00000043039	136.906	0.947277	0.257467	3.67922	0.000233949	0.00292362	BARX2	3.67922
ENSG00000176788	5720.62	-0.0268333	0.143491	-0.187004	0.851658	0.935005	BASP1	-0.187004
ENSG00000168062	86.7016	0.545903	0.312717	1.74568	0.080867	0.242162	BATF2	1.74568
ENSG00000123685	48.4175	0.631174	0.3896	1.62005	0.105221	0.289804	BATF3	1.62005
ENSG00000087088	863.766	0.206903	0.124908	1.65644	0.0976325	0.275607	BAX	1.65644
ENSG00000198604	1703.11	0.212035	0.118223	1.79352	0.0728897	0.226439	BAZ1A	1.79352
ENSG00000009954	7507.87	-0.0297445	0.102274	-0.290831	0.771181	0.899159	BAZ1B	-0.290831
ENSG00000076108	4684.63	-0.202152	0.104528	-1.93395	0.0531191	0.183235	BAZ2A	-1.93395
ENSG00000123636	1067.77	-0.255262	0.171156	-1.4914	0.135857	0.341621	BAZ2B	-1.4914
ENSG00000226266	31.2147	0.757168	0.448767	1.68722	0.0915613	0.263071	BAZ2B	1.68722
ENSG00000105327	146.852	-0.899779	0.281704	-3.19406	0.00140288	0.0123077	BBC3	-3.19406
ENSG00000214413	548.025	-0.139267	0.163582	-0.851356	0.394572	0.645153	BBIP1	-0.851356
ENSG00000119636	55.5021	-0.347791	0.400739	-0.867874	0.385463	0.636505	BBOF1	-0.867874
ENSG00000174483	297.191	-0.281683	0.337235	-0.835272	0.403564	0.653294	BBS1	-0.835272
ENSG00000179941	553.604	-0.584785	0.158116	-3.69846	0.000216915	0.00275588	BBS10	-3.69846
ENSG00000181004	91.8429	-0.337255	0.273812	-1.2317	0.21806	0.458849	BBS12	-1.2317
ENSG00000125124	695.873	-0.455586	0.159554	-2.85537	0.00429869	0.0293759	BBS2	-2.85537
ENSG00000140463	438.889	0.357062	0.179465	1.9896	0.0466353	0.16851	BBS4	1.9896
ENSG00000163093	276.809	-0.0292643	0.146329	-0.199991	0.841488	0.929858	BBS5	-0.199991
ENSG00000138686	348.722	-0.292504	0.15397	-1.89974	0.0574672	0.193622	BBS7	-1.89974
ENSG00000122507	258.894	-0.266076	0.161115	-1.65146	0.0986441	0.277515	BBS9	-1.65146
ENSG00000114439	1849.06	0.0640815	0.250956	0.25535	0.798453	0.911102	BBX	0.25535
ENSG00000187244	457.537	-0.796337	0.224102	-3.55345	0.000380212	0.00431654	BCAM	-3.55345
ENSG00000075790	761.813	-0.633086	0.238849	-2.65057	0.00803552	0.0471093	BCAP29	-2.65057
ENSG00000185825	5365.67	0.45218	0.155272	2.91219	0.0035891	0.0255381	BCAP31	2.91219
ENSG00000050820	2144.59	0.0971605	0.183135	0.530541	0.595737	0.797679	BCAR1	0.530541
ENSG00000137936	765.386	0.643263	0.152015	4.23158	2.32e-05	0.000432811	BCAR3	4.23158
ENSG00000064787	138.457	-0.961026	0.359441	-2.67367	0.00750263	0.0448058	BCAS1	-2.67367
ENSG00000116752	650.198	0.0900805	0.128687	0.699996	0.48393	0.717435	BCAS2	0.699996
ENSG00000141376	218.215	-0.802656	0.181326	-4.42659	9.57e-06	0.000206285	BCAS3	-4.42659
ENSG00000124243	1065.17	-0.509053	0.131496	-3.87124	0.000108284	0.00155155	BCAS4	-3.87124
ENSG00000060982	202.78	-0.179704	0.339708	-0.528996	0.596808	0.798438	BCAT1	-0.528996
ENSG00000105552	643.475	-0.133199	0.122297	-1.08914	0.276091	0.528914	BCAT2	-1.08914
ENSG00000107949	2861.59	0.562813	0.134598	4.18145	2.9e-05	0.000519265	BCCIP	4.18145
ENSG00000186666	153.19	-0.437143	0.259313	-1.68578	0.091839	0.26345	BCDIN3D	-1.68578
ENSG00000248098	286.475	-0.0581679	0.149155	-0.389984	0.696548	0.859406	BCKDHA	-0.389984
ENSG00000083123	370.882	-0.581402	0.162447	-3.57902	0.000344884	0.00398615	BCKDHB	-3.57902
ENSG00000103507	1046.83	-0.0321765	0.175168	-0.18369	0.854257	0.936718	BCKDK	-0.18369
ENSG00000142867	1375.3	0.875917	0.135607	6.45922	1.05e-10	8.16e-09	BCL10	6.45922
ENSG00000140379	196.988	2.88481	0.240848	11.9777	4.65e-33	1.32e-29	BCL2A1	11.9777
ENSG00000171552	3172.2	0.520728	0.138644	3.75586	0.000172749	0.00228091	BCL2L1	3.75586
ENSG00000153094	449.415	-1.72557	0.757129	-2.2791	0.0226611	0.100696	BCL2L11	-2.2791
ENSG00000126453	497.292	0.361714	0.194183	1.86274	0.0624984	0.204534	BCL2L12	1.86274
ENSG00000099968	1485.04	0.25104	0.142161	1.76589	0.0774149	0.235016	BCL2L13	1.76589
ENSG00000129473	232.996	2.38168	1.05182	2.26435	NA	NA	BCL2L2	2.26435
ENSG00000258643	142.398	-1.14697	0.44225	-2.59348	0.00950093	0.0535642	BCL2L2-PABPN1	-2.59348
ENSG00000069399	643.943	-0.0173843	0.193363	-0.089905	0.928363	0.970075	BCL3	-0.089905
ENSG00000113916	524.129	0.127205	0.155077	0.820273	0.412061	0.660085	BCL6	0.820273
ENSG00000110987	593.463	-0.0586091	0.135826	-0.4315	0.666105	0.842163	BCL7A	-0.4315
ENSG00000106635	1461.39	0.340805	0.182683	1.86555	0.062104	0.203711	BCL7B	1.86555
ENSG00000099385	1063.88	-0.112476	0.102177	-1.1008	0.270983	0.523761	BCL7C	-1.1008
ENSG00000116128	905.076	-0.274257	0.122416	-2.24037	0.0250671	0.108166	BCL9	-2.24037
ENSG00000186174	7094.32	-0.0537752	0.0914579	-0.587978	0.556547	0.770308	BCL9L	-0.587978
ENSG00000029363	2935.57	-0.124338	0.121621	-1.02234	0.306619	0.560402	BCLAF1	-1.02234
ENSG00000173681	245.434	-0.505258	0.283513	-1.78213	0.0747278	0.229807	BCLAF3	-1.78213
ENSG00000197580	46.6039	0.929313	0.440572	2.10934	0.0349157	0.13708	BCO2	2.10934
ENSG00000183337	1770.58	-0.424435	0.200495	-2.11693	0.0342656	0.135593	BCOR	-2.11693
ENSG00000085185	1531.88	-0.396897	0.150679	-2.63406	0.00843713	0.0489004	BCORL1	-2.63406
ENSG00000186716	1149.98	-0.143907	0.133421	-1.07859	0.28077	0.533704	BCR	-1.07859
ENSG00000074582	485.761	1.01182	0.178917	5.65525	1.56e-08	7.2e-07	BCS1L	5.65525
ENSG00000236824	262.897	-0.182685	0.319697	-0.571431	0.567707	0.778238	BCYRN1	-0.571431
ENSG00000161267	97.8773	0.45608	0.377457	1.2083	0.226933	0.470388	BDH1	1.2083
ENSG00000145734	2298.6	-0.0143318	0.23244	-0.0616582	0.950835	0.980123	BDP1	-0.0616582
ENSG00000126581	964.64	-0.0851729	0.103592	-0.822199	0.410964	0.659186	BECN1	-0.822199
ENSG00000183092	721.071	0.0793611	0.133241	0.595621	0.551429	0.766552	BEGAIN	0.595621
ENSG00000178409	296.246	0.338325	0.167871	2.01538	0.0438644	0.161217	BEND3	2.01538
ENSG00000151917	451.105	0.00905766	0.13693	0.0661481	0.94726	0.978624	BEND6	0.0661481
ENSG00000165626	107.765	-0.0327884	0.252232	-0.129993	0.896572	0.955865	BEND7	-0.129993
ENSG00000167995	525.327	-0.26049	0.382245	-0.681474	0.495571	0.726921	BEST1	-0.681474
ENSG00000105829	402.372	-0.324945	0.354201	-0.917404	0.358931	0.614316	BET1	-0.917404
ENSG00000177951	2822.64	0.0471789	0.104512	0.451423	0.651685	0.832648	BET1L	0.451423
ENSG00000133134	210.923	0.398857	0.396714	1.0054	0.314703	0.568632	BEX2	1.0054
ENSG00000166681	1111.67	-0.171595	0.132314	-1.29687	0.194675	0.428484	BEX3	-1.29687
ENSG00000102409	40.7867	0.507201	0.510359	0.993813	0.320314	0.574325	BEX4	0.993813
ENSG00000103429	2547.95	-0.170963	0.150251	-1.13785	0.255183	0.504333	BFAR	-1.13785
ENSG00000125864	161.765	-0.330618	0.203888	-1.62156	0.104897	0.289162	BFSP1	-1.62156
ENSG00000198908	128.966	1.71808	0.634689	2.70697	0.00679005	0.0416148	BHLHB9	2.70697
ENSG00000134107	2408.71	0.0331571	0.221475	0.14971	0.880993	0.949075	BHLHE40	0.14971
ENSG00000123095	2282.9	-0.494545	0.133755	-3.6974	0.000217817	0.00276557	BHLHE41	-3.6974
ENSG00000151746	722.998	-0.0200854	0.117715	-0.170628	0.864516	0.941493	BICD1	-0.170628
ENSG00000185963	1042.37	0.107576	0.110893	0.970083	0.332005	0.586283	BICD2	0.970083
ENSG00000135127	486.718	0.112235	0.252948	0.443709	0.657253	0.83634	BICDL1	0.443709
ENSG00000063169	214.679	-0.00813082	0.211981	-0.0383564	0.969404	0.988125	BICRA	-0.0383564
ENSG00000112624	844.969	-0.229988	0.147294	-1.56142	0.118426	0.313438	BICRAL	-1.56142
ENSG00000015475	999.934	-0.165334	0.163221	-1.01294	0.311086	0.564874	BID	-1.01294
ENSG00000136717	1376.11	-0.0585183	0.132206	-0.442632	0.658032	0.83678	BIN1	-0.442632
ENSG00000147439	178.58	-0.0147554	0.183691	-0.0803271	0.935977	0.973709	BIN3	-0.0803271
ENSG00000110330	2034.6	0.236536	0.2726	0.867705	0.385556	0.636605	BIRC2	0.867705
ENSG00000023445	2937.99	0.393188	0.263969	1.48952	0.13635	0.342297	BIRC3	1.48952
ENSG00000089685	973.184	-0.355869	0.377639	-0.942351	0.346013	0.601018	BIRC5	-0.942351
ENSG00000115760	3859.06	-0.128898	0.0908808	-1.41832	0.156098	0.371123	BIRC6	-1.41832
ENSG00000101197	132.089	-0.197288	0.309153	-0.638158	0.523371	0.746571	BIRC7	-0.638158
ENSG00000282851	38.3704	-0.297158	0.400008	-0.742879	0.457555	0.697089	BISPR	-0.742879
ENSG00000134897	277.33	-0.216388	0.27715	-0.780763	0.434942	0.679173	BIVM	-0.780763
ENSG00000166619	1334.07	0.0375494	0.130545	0.287635	0.773626	0.90015	BLCAP	0.287635
ENSG00000197299	732.026	0.366305	0.158861	2.30582	0.0211204	0.0957586	BLM	2.30582
ENSG00000108578	1612.66	-0.0721472	0.13606	-0.530262	0.595931	0.797782	BLMH	-0.530262
ENSG00000135441	708.733	-0.0806688	0.140821	-0.572847	0.566748	0.777434	BLOC1S1	-0.572847
ENSG00000258311	48.7633	1.05133	0.748611	1.40438	0.160207	0.377379	BLOC1S1-RDH5	1.40438
ENSG00000196072	400.304	0.210488	0.132819	1.58477	0.113018	0.303743	BLOC1S2	1.58477
ENSG00000189114	415.963	0.0329481	0.157853	0.208727	0.834661	0.9267	BLOC1S3	0.208727
ENSG00000186222	199.335	-0.122516	0.180964	-0.677019	0.498394	0.728628	BLOC1S4	-0.677019
ENSG00000188428	352.812	-0.220066	0.164207	-1.34017	0.180191	0.407803	BLOC1S5	-1.34017
ENSG00000259040	5847.73	0.407077	2.255	0.180522	0.856742	0.937949	BLOC1S5-TXNDC5	0.180522
ENSG00000104164	1756.13	-0.330979	0.142952	-2.31532	0.0205955	0.0940878	BLOC1S6	-2.31532
ENSG00000106605	1527.98	-0.11353	0.130405	-0.870597	0.383974	0.635156	BLVRA	-0.870597
ENSG00000090013	542.536	0.209778	0.220697	0.950526	0.341845	0.59686	BLVRB	0.950526
ENSG00000117475	772.088	0.541491	0.140573	3.85202	0.000117145	0.0016511	BLZF1	3.85202
ENSG00000104081	260.338	-2.46502	0.480184	-5.13348	2.84e-07	9.68e-06	BMF	-5.13348
ENSG00000168283	1687.64	0.0486716	0.105359	0.461961	0.644109	0.82798	BMI1	0.461961
ENSG00000168487	225.393	0.125237	0.1652	0.758091	0.448396	0.690391	BMP1	0.758091
ENSG00000138756	550.11	-0.0165578	0.175913	-0.0941247	0.92501	0.968896	BMP2K	-0.0941247
[truncated: 11,308 more rows]
